# Supplementary material for: Interaction of Wnt Signaling with BMP/Smad Signaling during the Transition from Cell Proliferation to Myogenic Differentiation in Mouse Myoblast-Derived Cells
Source: Int J Cell Biol. 2013 Jun 20;2013:616294. doi: 10.1155/2013/616294 (PMC3705783; doi:10.1155/2013/616294)
Supplement: Supplementary file 1 — Expression profiles after clustering analysis for mouse whole transcripts. Messenger RNAs from C2C12 in proliferating medium (C2C12-PR), C2C12 in differentiation medium (C1C12-DF), and W4-08 in proliferating medium (C2C12-W4-08) were analyzed with the 3D-GeneTM mouse oligo chip 24K (Toray Industries, Inc., Tokyo). [file 616294.f1.xls]

## Sheet: ReadMe
1．Combination of samples
	Order NO.	Cy5	Cy3	Tip ID	Tip name
	MAA-11101	C2C12-PR	-	EM06Y10	Mouse 24K
	MAA-11101	C2C12-DF	-	EM06Y11	Mouse 24K
	MAA-11140	C2C12-W4-08	-	EM0YQ24	Mouse 24K
２．Explanation for sheets
	Data	Integrated data with gene ID and annotation for used tips
	up-up	Up-regulated genes in C2C12-DF/C2C12-PR and C2C12-W4-08/C2C12-PR
	down-down	Down-regulated genes in C2C12-DF/C2C12-PR and C2C12-W4-08/C2C12-PR
	up-down	Up-regulated genes in C2C12-DF/C2C12-PR, but down-regulated in C2C12-W4-08/C2C12-PR
	down-up	Down-regulated genes in C2C12-DF/C2C12-PR, but up-regulated in C2C12-W4-08/C2C12-PR
３．Explanation for items
	global normalization	Normalized value as median of variation (y/x) becomes 1
	*globalnormalization is empty when no expression is detectable (raw data was less than BG + 2SD)
	*global normalization is used for analysis in general
	*global normalization is equal or above 20■, and 100■
４．Explanation for analysis		fold-change	Ratio of variation
	up	*	ratio(y/x) is equal or above 2
		**	ratio(y/x) is equal or above 4
		***	ratio(y/x) is equal or above 8
	down	*	ratio(x/y) is equal or above 2
		**	ratio(x/y) is equal or above 4
		***	ratio(x/y) is equal or above 8

## Sheet: Data
										C2C12-DF／C2C12-PR						C2C12-W4-08／C2C12-PR
										global normalization				fold_change		global normalization				fold_change
Name	ID	ensembl_id	RefSeq_id	Enterz_id	symbol	description	GO_biological_process	GO_molecular_function	GO_cellular_component	C2C12-PR	C2C12-DF	ratio	LOG2ratio	up	down	C2C12-PR	C2C12-W4-08	ratio	LOG2ratio	up	down
Mmp13	M200002096	ENSMUSG00000050578	NM_008607	17386	Mmp13	matrix metallopeptidase 13 [Source:MarkerSymbol;Acc:MGI:1340026]	GO:0000270(peptidoglycan metabolic process);GO:0006508(proteolysis);GO:0030282(bone mineralization);GO:0030574(collagen catabolic process);GO:0051216(cartilage development)	GO:0004222(metalloendopeptidase activity);GO:0004232(interstitial collagenase activity);GO:0005509(calcium ion binding);GO:0008133(collagenase activity);GO:0008233(peptidase activity);GO:0008237(metallopeptidase activity);GO:0008270(zinc ion binding);GO:0016787(hydrolase activity);GO:0046872(metal ion binding)	GO:0005578(proteinaceous extracellular matrix);GO:0005615(extracellular space)	6.87962	12.945	1.88165	0.911998			6.87962	1.09152	0.15866	-2.65599		**
Thrb	M200001931	ENSMUSG00000021779	NM_009380	21834	Thrb	thyroid hormone receptor beta [Source:MarkerSymbol;Acc:MGI:98743]	GO:0006350(transcription);GO:0006355(regulation of transcription, DNA-dependent);GO:0007605(sensory perception of sound);GO:0008016(regulation of heart contraction);GO:0009887(organ morphogenesis);GO:0016481(negative regulation of transcription);GO:0045944(positive regulation of transcription from RNA polymerase II promoter)	GO:0003677(DNA binding);GO:0003700(transcription factor activity);GO:0003707(steroid hormone receptor activity);GO:0004872(receptor activity);GO:0004879(ligand-dependent nuclear receptor activity);GO:0004887(thyroid hormone receptor activity);GO:0005515(protein binding);GO:0008270(zinc ion binding);GO:0016564(transcriptional repressor activity);GO:0043565(sequence-specific DNA binding);GO:0046872…	GO:0005634(nucleus)	7.72195	4.64492	0.601521	-0.733312			7.72195	2.27122	0.294126	-1.7655		*
Wnt10b	M200001904	ENSMUSG00000022996	NM_011718	22410	Wnt10b	wingless related MMTV integration site 10b [Source:MarkerSymbol;Acc:MGI:108061]	GO:0007165(signal transduction);GO:0007223(Wnt receptor signaling pathway, calcium modulating pathway);GO:0007267(cell-cell signaling);GO:0007275(multicellular organismal development);GO:0009887(organ morphogenesis);GO:0016055(Wnt receptor signaling pathway)	GO:0004871(signal transducer activity);GO:0005102(receptor binding)	GO:0005576(extracellular region);GO:0005615(extracellular space)	25.3786	14.1759	0.558575	-0.840178			25.3786	11.7758	0.464004	-1.10779		*
Sh3bp1	M200001756	ENSMUSG00000022436	NM_009164	0	Sh3bp1	SH3-domain binding protein 1 [Source:MarkerSymbol;Acc:MGI:104603]				53.2273	23.9957	0.450816	-1.14939		*	53.2273	18.2102	0.342121	-1.54742		*
Mmp9	M200001725	ENSMUSG00000017737	NM_013599	17395	Mmp9	matrix metallopeptidase 9 [Source:MarkerSymbol;Acc:MGI:97011]	GO:0000270(peptidoglycan metabolic process);GO:0001501(skeletal development);GO:0006508(proteolysis);GO:0030198(extracellular matrix organization and biogenesis);GO:0030225(macrophage differentiation);GO:0030574(collagen catabolic process);GO:0043065(positive regulation of apoptosis)	GO:0004222(metalloendopeptidase activity);GO:0004229(gelatinase B activity);GO:0005509(calcium ion binding);GO:0005515(protein binding);GO:0005518(collagen binding);GO:0008133(collagenase activity);GO:0008233(peptidase activity);GO:0008237(metallopeptidase activity);GO:0008270(zinc ion binding);GO:0016787(hydrolase activity);GO:0046872(metal ion binding)	GO:0005578(proteinaceous extracellular matrix);GO:0005615(extracellular space)	3.59394	2.68498	0.747086	-0.420653			3.59394
Xpa	M200001568	ENSMUSG00000028329	NM_011728	22590	Xpa	xeroderma pigmentosum, complementation group A [Source:MarkerSymbol;Acc:MGI:99135]	GO:0006281(DNA repair);GO:0006289(nucleotide-excision repair);GO:0006974(response to DNA damage stimulus);GO:0006979(response to oxidative stress);GO:0008630(DNA damage response, signal transduction resulting in induction of apoptosis);GO:0009411(response to UV);GO:0009636(response to toxin)	GO:0003677(DNA binding);GO:0003684(damaged DNA binding);GO:0008270(zinc ion binding);GO:0046872(metal ion binding)	GO:0005634(nucleus)	118.632	156.492	1.31914	0.399594			118.632	95.2507	0.80291	-0.31669
Clpb	M200001543	ENSMUSG00000001829	NM_009191	0	Clpb	ClpB caseinolytic peptidase B homolog (E. coli) [Source:MarkerSymbol;Acc:MGI:1100517]	GO:0006355(regulation of transcription, DNA-dependent)	GO:0000166(nucleotide binding);GO:0003677(DNA binding);GO:0003700(transcription factor activity);GO:0005524(ATP binding);GO:0017111(nucleoside-triphosphatase activity)		171.924	102.129	0.594038	-0.751372			171.924	98.1402	0.570836	-0.808852
Txn2	M200001385	ENSMUSG00000005354	NM_019913	0	Txn2	thioredoxin 2 [Source:MarkerSymbol;Acc:MGI:1929468]				845.572	600.242	0.709865	-0.494384			845.572	767.517	0.907689	-0.13973
Fnta	M200001360	ENSMUSG00000015994	NM_008033	100046996	Fnta	farnesyltransferase, CAAX box, alpha [Source:MarkerSymbol;Acc:MGI:104683]	GO:0018346(protein amino acid prenylation);GO:0045213(neurotransmitter receptor metabolic process)	GO:0004659(prenyltransferase activity);GO:0004660(protein farnesyltransferase activity);GO:0004662(CAAX-protein geranylgeranyltransferase activity);GO:0005515(protein binding);GO:0008318(protein prenyltransferase activity);GO:0016740(transferase activity);GO:0030548(acetylcholine receptor regulator activity)		769.018	779.549	1.01369	0.0196216			769.018	296.361	0.385376	-1.37566		*
Clec4f	M200001195	ENSMUSG00000014542	NM_016751	51811	Clec4f	C-type lectin domain family 4, member f [Source:MarkerSymbol;Acc:MGI:1859834]	GO:0006897(endocytosis)	GO:0004872(receptor activity);GO:0005529(sugar binding)	GO:0016020(membrane);GO:0016021(integral to membrane)	3.75319	3.58299	0.954651	-0.066954			3.75319	15.5895	4.15365	2.05438	**
Sipa1	M200001174	ENSMUSG00000056917	NM_011379	20469	Sipa1	signal-induced proliferation associated gene 1 [Source:MarkerSymbol;Acc:MGI:107576]	GO:0000074(regulation of progression through cell cycle);GO:0051056(regulation of small GTPase mediated signal transduction)	GO:0005096(GTPase activator activity);GO:0005515(protein binding)	GO:0005622(intracellular);GO:0005634(nucleus)	145.81	69.3207	0.475417	-1.07274		*	145.81	43.8092	0.300453	-1.73479		*
Mgat1	M200001020	ENSMUSG00000020346		17308	Mgat1	mannoside acetylglucosaminyltransferase 1 [Source:MarkerSymbol;Acc:MGI:96973]	GO:0006487(protein amino acid N-linked glycosylation)	GO:0003827(alpha-1,3(mannosylglycoprotein 2(beta-N-acetylglucosaminyltransferase activity);GO:0016740(transferase activity);GO:0016757(transferase activity, transferring glycosyl groups)	GO:0000139(Golgi membrane);GO:0005615(extracellular space);GO:0016020(membrane);GO:0016021(integral to membrane)	275.848	139.634	0.506198	-0.982226			275.848	148.414	0.538029	-0.894245
Pabpc1	M200001005	ENSMUSG00000022283	NM_008774	18458	Pabpc1	poly A binding protein, cytoplasmic 1 [Source:MarkerSymbol;Acc:MGI:1349722]	GO:0006397(mRNA processing);GO:0008380(RNA splicing);GO:0016071(mRNA metabolic process)	GO:0000166(nucleotide binding);GO:0003676(nucleic acid binding);GO:0003723(RNA binding);GO:0008143(poly(A) binding)	GO:0005681(spliceosome);GO:0005737(cytoplasm)	9544.16	4821.27	0.505154	-0.985204			9544.16	5549.77	0.581483	-0.782191
Eya2	M200000844	ENSMUSG00000017897	NM_010165	0	Eya2	eyes absent 2 homolog (Drosophila) [Source:MarkerSymbol;Acc:MGI:109341]	GO:0006350(transcription);GO:0006355(regulation of transcription, DNA-dependent);GO:0006470(protein amino acid dephosphorylation);GO:0007275(multicellular organismal development);GO:0008152(metabolic process);GO:0008632(apoptotic program)	GO:0000287(magnesium ion binding);GO:0003824(catalytic activity);GO:0004721(phosphoprotein phosphatase activity);GO:0004725(protein tyrosine phosphatase activity);GO:0016787(hydrolase activity)	GO:0005634(nucleus);GO:0005730(nucleolus);GO:0005737(cytoplasm)	5.10362	2.6826	0.525628	-0.927887			5.10362	1.59473	0.312469	-1.67821		*
Rev3l	M200000824	ENSMUSG00000019841	NM_011264	19714	Rev3l	REV3-like, catalytic subunit of DNA polymerase zeta RAD54 like (S. cerevisiae) [Source:MarkerSymbol;Acc:MGI:1337131]	GO:0006260(DNA replication);GO:0006281(DNA repair);GO:0006974(response to DNA damage stimulus)	GO:0000166(nucleotide binding);GO:0003677(DNA binding);GO:0003887(DNA-directed DNA polymerase activity);GO:0008270(zinc ion binding);GO:0008408(3'-5' exonuclease activity);GO:0016740(transferase activity);GO:0016779(nucleotidyltransferase activity);GO:0046872(metal ion binding)	GO:0005634(nucleus)	126.629	88.2252	0.696724	-0.52134			126.629	89.5383	0.707094	-0.500026
Fxyd3	M200000665	ENSMUSG00000057092	NM_008557	17178	Fxyd3	FXYD domain-containing ion transport regulator 3 [Source:MarkerSymbol;Acc:MGI:107497]	GO:0006810(transport);GO:0006811(ion transport)	GO:0005216(ion channel activity);GO:0005254(chloride channel activity);GO:0031404(chloride ion binding)	GO:0005615(extracellular space);GO:0016020(membrane);GO:0016021(integral to membrane)	3.01424	3.01978	1.00184	0.00264942			3.01424	1.18563	0.393343	-1.34614		*
Ctf1	M200000650	ENSMUSG00000042340	NM_007795	13019	Ctf1	cardiotrophin 1 [Source:MarkerSymbol;Acc:MGI:105115]	GO:0048666(neuron development)	GO:0005125(cytokine activity)	GO:0005615(extracellular space)	27.0852	31.8893	1.17737	0.235567			27.0852	15.6216	0.576758	-0.793962
Il13	M200000488	ENSMUSG00000020383	NM_008355	16163	Il13	interleukin 13 [Source:MarkerSymbol;Acc:MGI:96541]	GO:0006955(immune response)	GO:0005125(cytokine activity);GO:0005126(hematopoietin/interferon-class (D200(domain) cytokine receptor binding);GO:0005144(interleukin-13 receptor binding)	GO:0005576(extracellular region);GO:0005615(extracellular space)	17.2892	12.3249	0.712867	-0.488296			17.2892	12.9233	0.747478	-0.419898
Cdc45l	M200000463	ENSMUSG00000000028	NM_009862	0	Cdc45l	cell division cycle 45 homolog (S. cerevisiae)-like [Source:MarkerSymbol;Acc:MGI:1338073]	GO:0000074(regulation of progression through cell cycle);GO:0006260(DNA replication);GO:0006270(DNA replication initiation);GO:0007049(cell cycle);GO:0051301(cell division)	GO:0005515(protein binding)	GO:0005634(nucleus)	516.299	266.858	0.516867	-0.952134			516.299	246.782	0.477982	-1.06497		*
Hoxb1	M200000317	ENSMUSG00000018973	NM_008266	15407	Hoxb1	homeo box B1 [Source:MarkerSymbol;Acc:MGI:96182]	GO:0006350(transcription);GO:0006355(regulation of transcription, DNA-dependent);GO:0007275(multicellular organismal development);GO:0007389(pattern specification process);GO:0009887(organ morphogenesis);GO:0045449(regulation of transcription)	GO:0003677(DNA binding);GO:0003700(transcription factor activity);GO:0019904(protein domain specific binding);GO:0043565(sequence-specific DNA binding)	GO:0005634(nucleus);GO:0005667(transcription factor complex)	3.47896	5.25829	1.51145	0.595938			3.47896	3.98069	1.14422	0.194361
Emid1	M200000295	ENSMUSG00000034164	NM_080595	140703	Emid1	EMI domain containing 1 [Source:MarkerSymbol;Acc:MGI:2155091]	GO:0006817(phosphate transport)	GO:0005515(protein binding)	GO:0005578(proteinaceous extracellular matrix);GO:0005615(extracellular space);GO:0005737(cytoplasm);GO:0005783(endoplasmic reticulum);GO:0005794(Golgi apparatus)	6.80183	4.97779	0.731831	-0.450418			6.80183	7.75395	1.13998	0.189007
Zc3h12a	M200000151	ENSMUSG00000042677	NM_153159	230738	Zc3h12a	zinc finger CCCH type containing 12A [Source:MarkerSymbol;Acc:MGI:2385891]				14.3608	17.146	1.19395	0.255743			14.3608	7.68086	0.534851	-0.902791
Lipc	M200000126	ENSMUSG00000032207	NM_008280	15450	Lipc	lipase, hepatic [Source:MarkerSymbol;Acc:MGI:96216]	GO:0006629(lipid metabolic process);GO:0016042(lipid catabolic process)	GO:0003824(catalytic activity);GO:0004806(triacylglycerol lipase activity);GO:0005319(lipid transporter activity);GO:0008201(heparin binding);GO:0016298(lipase activity);GO:0016787(hydrolase activity)	GO:0005615(extracellular space)	4.05735	3.80523	0.937861	-0.0925533			4.05735	2.23081	0.54982	-0.862969
Fkbp9	M200004019	ENSMUSG00000029781	NM_012056	27055	Fkbp9	FK506 binding protein 9 [Source:MarkerSymbol;Acc:MGI:1350921]	GO:0006457(protein folding)	GO:0003755(peptidyl-prolyl cis-trans isomerase activity);GO:0005509(calcium ion binding);GO:0016853(isomerase activity)	GO:0005615(extracellular space);GO:0005783(endoplasmic reticulum)	726.029	711.467	0.979943	-0.0292304			726.029	475.794	0.655337	-0.609691
Cdc6	M200003999	ENSMUSG00000017499	NM_011799	23834	Cdc6	cell division cycle 6 homolog (S. cerevisiae) [Source:MarkerSymbol;Acc:MGI:1345150]	GO:0006260(DNA replication);GO:0007049(cell cycle);GO:0007067(mitosis);GO:0051301(cell division)	GO:0000166(nucleotide binding);GO:0003682(chromatin binding);GO:0005515(protein binding);GO:0005524(ATP binding);GO:0017111(nucleoside-triphosphatase activity)	GO:0005634(nucleus);GO:0005737(cytoplasm);GO:0005819(spindle)	245.068	73.5378	0.300072	-1.73662		*	245.068	101.001	0.412137	-1.2788		*
Fignl1	M200003863	ENSMUSG00000035455	NM_021891	60530	Fignl1	fidgetin-like 1 [Source:MarkerSymbol;Acc:MGI:1890648]		GO:0000166(nucleotide binding);GO:0005524(ATP binding);GO:0017111(nucleoside-triphosphatase activity)		64.5153	21.7988	0.337885	-1.56539		*	64.5153	39.551	0.613049	-0.705927
Asrgl1	M200003841	ENSMUSG00000024654	NM_025610	66514	Asrgl1	asparaginase like 1 [Source:MarkerSymbol;Acc:MGI:1913764]	GO:0006516(glycoprotein catabolic process)	GO:0004067(asparaginase activity)		13.6837	13.2251	0.966482	-0.0491856			13.6837	4.3765	0.319832	-1.64461		*
Mta3	M200003691	ENSMUSG00000055817	NM_054082	0	Mta3	metastasis associated 3 [Source:MarkerSymbol;Acc:MGI:2151172]	GO:0006355(regulation of transcription, DNA-dependent);GO:0008150(biological_process)	GO:0003674(molecular_function);GO:0003677(DNA binding);GO:0003700(transcription factor activity);GO:0008270(zinc ion binding);GO:0043565(sequence-specific DNA binding);GO:0046872(metal ion binding)	GO:0005634(nucleus);GO:0005737(cytoplasm)	51.4691	52.4009	1.0181	0.0258847			51.4691	38.1172	0.740585	-0.433263
Mki67ip	M200003673	ENSMUSG00000026377	NM_026472	67949	Mki67ip	Mki67 (FHA domain) interacting nucleolar phosphoprotein [Source:MarkerSymbol;Acc:MGI:1915199]	GO:0008150(biological_process)	GO:0000166(nucleotide binding);GO:0003676(nucleic acid binding);GO:0003723(RNA binding)	GO:0005634(nucleus);GO:0005654(nucleoplasm);GO:0005730(nucleolus);GO:0005737(cytoplasm)	310.357	228.871	0.737446	-0.439391			310.357	144.779	0.466493	-1.10007		*
Trex1	M200003525	ENSMUSG00000049734	NM_011637	0	Trex1	three prime repair exonuclease 1 [Source:MarkerSymbol;Acc:MGI:1328317]	GO:0006260(DNA replication);GO:0006281(DNA repair);GO:0006298(mismatch repair);GO:0006310(DNA recombination);GO:0006974(response to DNA damage stimulus)	GO:0000287(magnesium ion binding);GO:0003697(single-stranded DNA binding);GO:0004518(nuclease activity);GO:0004527(exonuclease activity);GO:0008408(3'-5' exonuclease activity);GO:0008853(exodeoxyribonuclease III activity);GO:0016787(hydrolase activity);GO:0032405(MutLalpha complex binding);GO:0032407(MutSalpha complex binding);GO:0042803(protein homodimerization activity)	GO:0005622(intracellular);GO:0005634(nucleus);GO:0005635(nuclear envelope);GO:0016021(integral to membrane)	31.0768	33.6291	1.08213	0.113872			31.0768	15.4345	0.496656	-1.00968		*
XP_110121.7	M200003507									172.685	179.146	1.03741	0.0529928			172.685	100.075	0.579523	-0.787062
Idh3g	M200003352	ENSMUSG00000002010	NM_008323	15929	Idh3g	isocitrate dehydrogenase 3 (NAD+), gamma [Source:MarkerSymbol;Acc:MGI:1099463]	GO:0006099(tricarboxylic acid cycle);GO:0008152(metabolic process)	GO:0000166(nucleotide binding);GO:0004449(isocitrate dehydrogenase (NAD+) activity);GO:0005524(ATP binding);GO:0016491(oxidoreductase activity);GO:0016616(oxidoreductase activity, acting on the CH-OH group of donors, NAD or NADP as acceptor)	GO:0005739(mitochondrion)	883.699	886.915	1.00364	0.00523951			883.699	342.219	0.387257	-1.36864		*
Wac	M200003325	ENSMUSG00000024283	NM_153085	100044766	Wac	WW domain containing adaptor with coiled-coil [Source:MarkerSymbol;Acc:MGI:2387357]			GO:0005634(nucleus);GO:0005681(spliceosome)	358.91	240.584	0.670318	-0.577082			358.91	212.906	0.5932	-0.753409
Fyttd1	M200003141	ENSMUSG00000022800	NM_027226	69823	Fyttd1	forty-two-three domain containing 1 [Source:MarkerSymbol;Acc:MGI:1917955]				144.367	126.677	0.877467	-0.188583			144.367	135.08	0.935675	-0.095921
Uxs1	M200003123	ENSMUSG00000057363	NM_026430	67883	Uxs1	UDP-glucuronate decarboxylase 1 [Source:MarkerSymbol;Acc:MGI:1915133]	GO:0044237(cellular metabolic process)	GO:0003824(catalytic activity);GO:0016829(lyase activity);GO:0016831(carboxy-lyase activity);GO:0048040(UDP-glucuronate decarboxylase activity);GO:0050662(coenzyme binding)	GO:0016020(membrane);GO:0016021(integral to membrane)	229.933	156.775	0.68183	-0.552516			229.933	164.816	0.716801	-0.480355
Dnajc4	M200002976	ENSMUSG00000024963	NM_020566	57431	Dnajc4	DnaJ (Hsp40) homolog, subfamily C, member 4 [Source:MarkerSymbol;Acc:MGI:1927346]	GO:0006457(protein folding)	GO:0031072(heat shock protein binding);GO:0051082(unfolded protein binding)	GO:0005615(extracellular space);GO:0016020(membrane);GO:0016021(integral to membrane)	156.846	178.577	1.13855	0.187201			156.846	131.186	0.836404	-0.257728
Punc	M200002960	ENSMUSG00000032394	NM_008988	19289	Punc	putative neuronal cell adhesion molecule [Source:MarkerSymbol;Acc:MGI:1202390]	GO:0007275(multicellular organismal development);GO:0030154(cell differentiation);GO:0050885(regulation of balance)	GO:0004872(receptor activity)	GO:0016020(membrane);GO:0016021(integral to membrane)	14.5387	11.6014	0.797967	-0.325598			14.5387	15.2699	1.0503	0.0708007
Pmm2	M200002815	ENSMUSG00000022711	NM_016881	54128	Pmm2	phosphomannomutase 2 [Source:MarkerSymbol;Acc:MGI:1859214]	GO:0008152(metabolic process);GO:0019307(mannose biosynthetic process)	GO:0003824(catalytic activity);GO:0004615(phosphomannomutase activity);GO:0016853(isomerase activity)	GO:0005737(cytoplasm)	76.5771	52.4083	0.684386	-0.547117			76.5771	79.8163	1.0423	0.0597702
Nbl1	M200002791	ENSMUSG00000041120	NM_008675	17965	Nbl1	neuroblastoma, suppression of tumorigenicity 1 [Source:MarkerSymbol;Acc:MGI:104591]	GO:0007049(cell cycle);GO:0045786(negative regulation of progression through cell cycle)		GO:0005615(extracellular space)	288.408	405.287	1.40525	0.490832			288.408	83.5069	0.289544	-1.78814		*
Ptpn20	M200002643									48.7502	47.8175	0.980868	-0.0278695			48.7502	51.9807	1.06626	0.0925654
Foxb2	M200002616	ENSMUSG00000056829	NM_008023	14240	Foxb2	forkhead box B2 [Source:MarkerSymbol;Acc:MGI:1347468]	GO:0006350(transcription);GO:0006355(regulation of transcription, DNA-dependent)	GO:0003677(DNA binding);GO:0003700(transcription factor activity);GO:0043565(sequence-specific DNA binding)	GO:0005634(nucleus);GO:0005667(transcription factor complex)	17.8689	15.1823	0.849648	-0.235064			17.8689	17.3383	0.970302	-0.0434942
Alad	M200002468	ENSMUSG00000028393	NM_008525	0	Alad	aminolevulinate, delta-, dehydratase [Source:MarkerSymbol;Acc:MGI:96853]	GO:0006779(porphyrin biosynthetic process);GO:0006783(heme biosynthetic process);GO:0008152(metabolic process)	GO:0003824(catalytic activity);GO:0004655(porphobilinogen synthase activity);GO:0008270(zinc ion binding);GO:0016829(lyase activity);GO:0042802(identical protein binding);GO:0046872(metal ion binding)		463.447	253.917	0.547888	-0.868048			463.447	332.916	0.718347	-0.477246
Plcb3	M200002447	ENSMUSG00000024960	NM_008874	18797	Plcb3	phospholipase C, beta 3 [Source:MarkerSymbol;Acc:MGI:104778]	GO:0006629(lipid metabolic process);GO:0007165(signal transduction);GO:0007242(intracellular signaling cascade);GO:0016042(lipid catabolic process)	GO:0004435(phosphoinositide phospholipase C activity);GO:0004629(phospholipase C activity);GO:0004871(signal transducer activity);GO:0005509(calcium ion binding);GO:0016787(hydrolase activity)	GO:0005634(nucleus)	84.4846	62.8904	0.7444	-0.42585			84.4846	36.6949	0.434338	-1.20311		*
Apbh	M200002306	ENSMUSG00000062556	NM_020563	57426	Apbh	androgen-binding protein eta [Source:MarkerSymbol;Acc:MGI:1930867]			GO:0005615(extracellular space)	8.95129	7.28708	0.814081	-0.296755			8.95129	5.61096	0.626833	-0.673848
Slc5a11	M200002281	ENSMUSG00000030769	NM_146198	233836	Slc5a11	solute carrier family 5 (sodium/glucose cotransporter), member 11 [Source:MarkerSymbol;Acc:MGI:1919316]	GO:0006810(transport);GO:0006811(ion transport);GO:0006814(sodium ion transport)	GO:0005215(transporter activity)	GO:0016020(membrane);GO:0016021(integral to membrane)	7.72292	4.87622	0.631395	-0.663385			7.72292	10.3696	1.3427	0.425142
Bmp8a	M200002113	ENSMUSG00000032726	NM_007558	0	Bmp8a	bone morphogenetic protein 8a [Source:MarkerSymbol;Acc:MGI:104515]	GO:0001503(ossification);GO:0007179(transforming growth factor beta receptor signaling pathway);GO:0007275(multicellular organismal development);GO:0007283(spermatogenesis);GO:0030154(cell differentiation);GO:0040007(growth);GO:0051216(cartilage development)	GO:0005125(cytokine activity);GO:0008083(growth factor activity)	GO:0005615(extracellular space)	5.73823	3.19112	0.556116	-0.846543			5.73823	2.52534	0.440091	-1.18413		*
1700037C18Rik	M200005988	ENSMUSG00000005983		0	1700037C18Rik	RIKEN cDNA 1700037C18 gene [Source:MarkerSymbol;Acc:MGI:1920511]				8.30546	7.33747	0.883451	-0.178777			8.30546	5.25449	0.632655	-0.660509
Pctk3	M200005849	ENSMUSG00000026437	NM_008795	0	Pctk3	PCTAIRE-motif protein kinase 3 [Source:MarkerSymbol;Acc:MGI:97518]	GO:0006468(protein amino acid phosphorylation)	GO:0000166(nucleotide binding);GO:0004672(protein kinase activity);GO:0004674(protein serine/threonine kinase activity);GO:0004713(protein-tyrosine kinase activity);GO:0005524(ATP binding);GO:0016301(kinase activity);GO:0016740(transferase activity)		209.359	99.4929	0.475227	-1.07331		*	209.359	44.3722	0.211943	-2.23825		**
Glis2	M200005827	ENSMUSG00000014303	NM_031184	83396	Glis2	GLIS family zinc finger 2 [Source:MarkerSymbol;Acc:MGI:1932535]	GO:0006357(regulation of transcription from RNA polymerase II promoter)	GO:0003677(DNA binding);GO:0003700(transcription factor activity);GO:0008270(zinc ion binding);GO:0046872(metal ion binding)	GO:0005622(intracellular);GO:0005667(transcription factor complex)	112.066	90.2489	0.805321	-0.312364			112.066	49.634	0.442901	-1.17494		*
R3hcc1	M200005679	ENSMUSG00000034194		71843	R3hcc1	R3H domain and coiled-coil containing 1 [Source:MarkerSymbol;Acc:MGI:1919093]		GO:0003676(nucleic acid binding)		239.964	228.965	0.954162	-0.0676935			239.964	93.4092	0.389263	-1.36118		*
Dnajc15	M200005658	ENSMUSG00000022013	NM_025384	66148	Dnajc15	DnaJ (Hsp40) homolog, subfamily C, member 15 [Source:MarkerSymbol;Acc:MGI:1913398]	GO:0006457(protein folding)	GO:0031072(heat shock protein binding)	GO:0016020(membrane);GO:0016021(integral to membrane)	358.19	443.061	1.23694	0.306779			358.19	251.111	0.701055	-0.5124
Uroc1	M200005522	ENSMUSG00000034456	NM_144940	243537	Uroc1	urocanase domain containing 1 [Source:MarkerSymbol;Acc:MGI:2385332]	GO:0006547(histidine metabolic process);GO:0006548(histidine catabolic process)	GO:0016153(urocanate hydratase activity);GO:0016787(hydrolase activity);GO:0016829(lyase activity)		14.2891	11.7679	0.82356	-0.280054			14.2891	7.15003	0.500383	-0.998895
Rac3	M200005502	ENSMUSG00000018012	NM_133223	170758	Rac3	RAS-related C3 botulinum substrate 3 [Source:MarkerSymbol;Acc:MGI:2180784]	GO:0007242(intracellular signaling cascade);GO:0007264(small GTPase mediated signal transduction);GO:0030031(cell projection biogenesis);GO:0030036(actin cytoskeleton organization and biogenesis);GO:0050885(regulation of balance);GO:0050905(neuromuscular process)	GO:0000166(nucleotide binding);GO:0003924(GTPase activity);GO:0005515(protein binding);GO:0005525(GTP binding)	GO:0005622(intracellular);GO:0012505(endomembrane system);GO:0016020(membrane)	30.5543	29.083	0.951848	-0.0711968			30.5543	17.2176	0.563509	-0.82749
Bcas1	M200005360	ENSMUSG00000013523	NM_029815	0	Bcas1	breast carcinoma amplified sequence 1 [Source:MarkerSymbol;Acc:MGI:1924210]	GO:0008150(biological_process)	GO:0042803(protein homodimerization activity)	GO:0005829(cytosol)	7.75923	7.21749	0.930181	-0.104417			7.75923	2.34644	0.302407	-1.72544		*
Mrpl36	M200005345	ENSMUSG00000021607	NM_053163	94066	Mrpl36	mitochondrial ribosomal protein L36 [Source:MarkerSymbol;Acc:MGI:2137228]	GO:0006412(translation)	GO:0003674(molecular_function);GO:0003735(structural constituent of ribosome)	GO:0005615(extracellular space);GO:0005622(intracellular);GO:0005739(mitochondrion);GO:0005762(mitochondrial large ribosomal subunit);GO:0005840(ribosome);GO:0030529(ribonucleoprotein complex)	340.555	352.397	1.03477	0.049313			340.555	328.856	0.965647	-0.0504328
Fubp1	M200005179	ENSMUSG00000028034	NM_057172	51886	Fubp1	far upstream element (FUSE) binding protein 1 [Source:MarkerSymbol;Acc:MGI:1196294]	GO:0006350(transcription);GO:0006355(regulation of transcription, DNA-dependent)	GO:0003676(nucleic acid binding);GO:0003677(DNA binding)	GO:0005634(nucleus)	170.755	99.3318	0.581723	-0.781596			170.755	96.0487	0.562496	-0.830086
Abhd11	M200005157	ENSMUSG00000040532	NM_145215	0	Abhd11	abhydrolase domain containing 11 [Source:MarkerSymbol;Acc:MGI:1916008]	GO:0006725(aromatic compound metabolic process)	GO:0003824(catalytic activity);GO:0016787(hydrolase activity)		256.913	145.803	0.567518	-0.817261			256.913	48.7162	0.189622	-2.39881		**
1700021F05Rik	M200005020	ENSMUSG00000019797	NM_026411	67851	1700021F05Rik	RIKEN cDNA 1700021F05 gene [Source:MarkerSymbol;Acc:MGI:1915101]				332.563	327.295	0.98416	-0.0230355			332.563	246.741	0.741938	-0.43063
Arhgef5	M200004998	ENSMUSG00000033542		54324	Arhgef5	Rho guanine nucleotide exchange factor (GEF) 5 [Source:MarkerSymbol;Acc:MGI:1858952]	GO:0007242(intracellular signaling cascade);GO:0008150(biological_process);GO:0035023(regulation of Rho protein signal transduction)	GO:0003674(molecular_function);GO:0005085(guanyl-nucleotide exchange factor activity);GO:0005089(Rho guanyl-nucleotide exchange factor activity)	GO:0005575(cellular_component);GO:0005622(intracellular)	182.182	151.113	0.829462	-0.269752			182.182	190.422	1.04523	0.0638195
Mtmr6	M200004861	ENSMUSG00000021987	NM_144843	219135	Mtmr6	myotubularin related protein 6 [Source:MarkerSymbol;Acc:MGI:2145637]	GO:0006470(protein amino acid dephosphorylation);GO:0046839(phospholipid dephosphorylation)	GO:0004437(inositol or phosphatidylinositol phosphatase activity);GO:0004721(phosphoprotein phosphatase activity);GO:0004725(protein tyrosine phosphatase activity);GO:0016787(hydrolase activity)		275.566	260.314	0.944652	-0.0821445			275.566	134.513	0.488132	-1.03466		*
A530089I17Rik	M200004838	ENSMUSG00000038417	NM_133999	103199	A530089I17Rik	RIKEN cDNA A530089I17 gene [Source:MarkerSymbol;Acc:MGI:2143585]			GO:0016021(integral to membrane)	136.703	138.169	1.01072	0.0153869			136.703	92.5271	0.676848	-0.563097
Nek8	M200004690	ENSMUSG00000017405	NM_080849	140859	Nek8	NIMA (never in mitosis gene a)-related expressed kinase 8 [Source:MarkerSymbol;Acc:MGI:1890646]	GO:0006468(protein amino acid phosphorylation)	GO:0000166(nucleotide binding);GO:0000287(magnesium ion binding);GO:0004672(protein kinase activity);GO:0004674(protein serine/threonine kinase activity);GO:0004713(protein-tyrosine kinase activity);GO:0005524(ATP binding);GO:0016301(kinase activity);GO:0016740(transferase activity);GO:0046872(metal ion binding)		38.7391	45.2284	1.16751	0.223441			38.7391	11.6184	0.299915	-1.73738		*
Zcchc18	M200004665	ENSMUSG00000031428	NM_025893	0	Zcchc18	zinc finger, CCHC domain containing 18 [Source:MarkerSymbol;Acc:MGI:1914245]		GO:0003676(nucleic acid binding);GO:0008270(zinc ion binding)		42.7428	36.0896	0.844345	-0.244096			42.7428	29.1961	0.683066	-0.549904
2610204M08Rik	M200004511	ENSMUSG00000037679	NM_198411	0	2610204M08Rik	RIKEN cDNA 2610204M08 gene [Source:MarkerSymbol;Acc:MGI:1917685]	GO:0008152(metabolic process);GO:0016043(cellular component organization and biogenesis);GO:0030036(actin cytoskeleton organization and biogenesis)	GO:0003779(actin binding);GO:0005488(binding);GO:0017048(Rho GTPase binding)		84.5177	53.7523	0.635988	-0.652928			84.5177	68.6588	0.81236	-0.299808
1700017B05Rik	M200004489	ENSMUSG00000032300		0	1700017B05Rik	RIKEN cDNA 1700017B05 gene [Source:MarkerSymbol;Acc:MGI:1921461]				24.0957	18.7148	0.776688	-0.364594			24.0957	10.7035	0.444207	-1.1707		*
Tbc1d15	M200004335	ENSMUSG00000020130	NM_025706	66687	Tbc1d15	TBC1 domain family, member 15 [Source:MarkerSymbol;Acc:MGI:1913937]	GO:0032313(regulation of Rab GTPase activity)	GO:0005096(GTPase activator activity);GO:0005097(Rab GTPase activator activity)	GO:0005622(intracellular);GO:0005739(mitochondrion)	119.337	86.4202	0.724166	-0.465607			119.337	136.707	1.14555	0.196044
Stk40	M200004316	ENSMUSG00000042608	NM_028800	0	Stk40	serine/threonine kinase 40 [Source:MarkerSymbol;Acc:MGI:1921428]	GO:0006468(protein amino acid phosphorylation)	GO:0000166(nucleotide binding);GO:0004672(protein kinase activity);GO:0004674(protein serine/threonine kinase activity);GO:0005524(ATP binding);GO:0016301(kinase activity);GO:0016740(transferase activity)	GO:0005634(nucleus)	131.004	83.3558	0.636284	-0.652258			131.004	104.641	0.798759	-0.324169
Dap	M200004175	ENSMUSG00000039168	NM_146057	223453	Dap	death-associated protein [Source:MarkerSymbol;Acc:MGI:1918190]	GO:0006915(apoptosis);GO:0008624(induction of apoptosis by extracellular signals)			2443.5	1662.53	0.68039	-0.555566			2443.5	2186.7	0.894906	-0.160191
Rod1	M200004158	ENSMUSG00000028382	NM_144904;NM_178164	230257	Rod1	ROD1 regulator of differentiation 1 (S. pombe) [Source:MarkerSymbol;Acc:MGI:1923334]	GO:0006397(mRNA processing)	GO:0000166(nucleotide binding);GO:0003676(nucleic acid binding);GO:0003723(RNA binding)	GO:0005634(nucleus);GO:0030529(ribonucleoprotein complex)	117.633	83.6285	0.710926	-0.492229			117.633	92.8549	0.78936	-0.341245
Imp4	M200007857									50.9401	37.7752	0.741562	-0.431361			50.9401	29.6943	0.582926	-0.778617
Sap18	M200007834	ENSMUSG00000021963	NM_009119	0	Sap18	Sin3-associated polypeptide 18 [Source:MarkerSymbol;Acc:MGI:1277978]	GO:0006350(transcription);GO:0006355(regulation of transcription, DNA-dependent);GO:0016568(chromatin modification)	GO:0003674(molecular_function)	GO:0000118(histone deacetylase complex);GO:0005667(transcription factor complex)	41.5539	32.8876	0.791444	-0.337441			41.5539	15.6442	0.37648	-1.40935		*
4932442K08Rik	M200007698	ENSMUSG00000014763	NM_024203	67544	4932442K08Rik	RIKEN cDNA 4932442K08 gene [Source:MarkerSymbol;Acc:MGI:1914794]		GO:0004527(exonuclease activity)		111.847	96.238	0.860445	-0.216845			111.847	54.7143	0.48919	-1.03153		*
-	M300016509									29.3798	17.9332	0.610391	-0.712195			29.3798	24.8819	0.846904	-0.23973
Ulk1	M200007519	ENSMUSG00000029512	NM_009469	0	Ulk1	Unc-51 like kinase 1 (C. elegans) [Source:MarkerSymbol;Acc:MGI:1270126]	GO:0006468(protein amino acid phosphorylation);GO:0007265(Ras protein signal transduction);GO:0007409(axonogenesis)	GO:0000166(nucleotide binding);GO:0004672(protein kinase activity);GO:0004674(protein serine/threonine kinase activity);GO:0005515(protein binding);GO:0005524(ATP binding);GO:0016301(kinase activity);GO:0016740(transferase activity)	GO:0005624(membrane fraction);GO:0030659(cytoplasmic vesicle membrane);GO:0043005(neuron projection)	113.17	110.997	0.9808	-0.0279687			113.17	57.2572	0.50594	-0.982961
1700027J05Rik	M200007504	ENSMUSG00000015377	NM_027081	69440	1700027J05Rik	RIKEN cDNA 1700027J05 gene [Source:MarkerSymbol;Acc:MGI:1916690]				10.2314	8.79461	0.859571	-0.218311			10.2314	4.78346	0.467527	-1.09688		*
Rasl12	M200007343	ENSMUSG00000041696		70784	Rasl12	RAS-like, family 12 [Source:MarkerSymbol;Acc:MGI:1918034]	GO:0007264(small GTPase mediated signal transduction)	GO:0000166(nucleotide binding);GO:0005525(GTP binding)	GO:0016020(membrane)	6.53082	4.36459	0.668306	-0.581419			6.53082	1.43975	0.220455	-2.18145		**
Gpatc1	M200007320									54.7496	39.8474	0.727812	-0.458362			54.7496	35.1393	0.641819	-0.639762
Chm	M200007148									64.2829	59.5762	0.926782	-0.109698			64.2829	48.3991	0.752908	-0.409455
Ttc25	M200007126	ENSMUSG00000006784	XM_126529	74407	Ttc25	tetratricopeptide repeat domain 25 [Source:MarkerSymbol;Acc:MGI:1921657]		GO:0005488(binding)		4.42797	2.739	0.618568	-0.692995			4.42797	0.690672	0.15598	-2.68057		**
Mdh1b	M200006965	ENSMUSG00000025963	NM_029696	76668	Mdh1b	malate dehydrogenase 1B, NAD (soluble) [Source:MarkerSymbol;Acc:MGI:1923918]	GO:0006108(malate metabolic process)	GO:0016491(oxidoreductase activity);GO:0016615(malate dehydrogenase activity)		3.12181	2.29481	0.735089	-0.444008			3.12181	0.891098	0.285443	-1.80873		*
Pla2g12b	M200006930	ENSMUSG00000009646	NM_023530	69836	Pla2g12b	phospholipase A2, group XIIB [Source:MarkerSymbol;Acc:MGI:1917086]	GO:0006644(phospholipid metabolic process);GO:0016042(lipid catabolic process)	GO:0004623(phospholipase A2 activity);GO:0005509(calcium ion binding);GO:0016787(hydrolase activity);GO:0046872(metal ion binding)	GO:0005576(extracellular region);GO:0005615(extracellular space);GO:0005783(endoplasmic reticulum)	5.52686	1.79349	0.324504	-1.62369		*	5.52686	1.87648	0.33952	-1.55843		*
Tmem109	M200006786	ENSMUSG00000034659	NM_134142	68539	Tmem109	transmembrane protein 109 [Source:MarkerSymbol;Acc:MGI:1915789]			GO:0005615(extracellular space);GO:0016020(membrane);GO:0016021(integral to membrane)	364.878	331.337	0.908077	-0.139113			364.878	129.385	0.354597	-1.49575		*
Egln2	M200006758	ENSMUSG00000058709	NM_053208	112406	Egln2	EGL nine homolog 2 (C. elegans) [Source:MarkerSymbol;Acc:MGI:1932287]	GO:0001558(regulation of cell growth);GO:0001666(response to hypoxia);GO:0019538(protein metabolic process);GO:0030503(regulation of cell redox homeostasis);GO:0030520(estrogen receptor signaling pathway);GO:0045732(positive regulation of protein catabolic process)	GO:0005506(iron ion binding);GO:0008198(ferrous iron binding);GO:0016491(oxidoreductase activity);GO:0016702(oxidoreductase activity, acting on single donors with incorporation of molecular oxygen, incorporation of two atoms of oxygen);GO:0016706(oxidoreductase activity, acting on paired donors, with incorporation or reduction of molecular oxygen, 2(oxoglutarate as one don);GO:0019826(oxygen sens…	GO:0005634(nucleus)	168.287	200.877	1.19366	0.255392			168.287	135.213	0.803467	-0.31569
Mrps34	M200006629	ENSMUSG00000038880	NM_023260	0	Mrps34	mitochondrial ribosomal protein S34 [Source:MarkerSymbol;Acc:MGI:1930188]	GO:0008150(biological_process)	GO:0003674(molecular_function)	GO:0005575(cellular_component);GO:0005739(mitochondrion);GO:0030529(ribonucleoprotein complex)	59.0876	62.2747	1.05394	0.075792			59.0876	76.8046	1.29984	0.378337
Eif3s12	M200006614	ENSMUSG00000053565	NM_028659	0	Eif3s12	eukaryotic translation initiation factor 3, subunit 12 [Source:MarkerSymbol;Acc:MGI:1921080]	GO:0006412(translation);GO:0006413(translational initiation)	GO:0003723(RNA binding);GO:0003743(translation initiation factor activity);GO:0005515(protein binding)	GO:0005634(nucleus)	1288.59	1145.35	0.888846	-0.169994			1288.59	950.092	0.737313	-0.43965
Ndufb2	M200006474	ENSMUSG00000002416	NM_026612	68198	Ndufb2	NADH dehydrogenase (ubiquinone) 1 beta subcomplex, 2 [Source:MarkerSymbol;Acc:MGI:1915448]				383.822	265.288	0.691173	-0.532881			383.822	197.081	0.513469	-0.961652
Mmp23	M200006455	ENSMUSG00000029061	NM_011985	26561	Mmp23	matrix metallopeptidase 23 [Source:MarkerSymbol;Acc:MGI:1347361]	GO:0000003(reproduction);GO:0006508(proteolysis);GO:0006810(transport)	GO:0004222(metalloendopeptidase activity);GO:0005215(transporter activity);GO:0008233(peptidase activity);GO:0008237(metallopeptidase activity);GO:0008270(zinc ion binding);GO:0016787(hydrolase activity);GO:0046872(metal ion binding)	GO:0005578(proteinaceous extracellular matrix);GO:0016020(membrane);GO:0016021(integral to membrane)	13.4387	14.0698	1.04696	0.0662003			13.4387	10.9183	0.812447	-0.299655
Rtn1	M200006309	ENSMUSG00000021087	NM_153457	104001	Rtn1	reticulon 1 [Source:MarkerSymbol;Acc:MGI:1933947]	GO:0008150(biological_process)	GO:0003674(molecular_function)	GO:0005783(endoplasmic reticulum);GO:0016020(membrane);GO:0016021(integral to membrane)	114.494	112.721	0.98452	-0.0225076			114.494	83.4655	0.728996	-0.456017
Eif2b2	M200006289	ENSMUSG00000004788	NM_145445	217715	Eif2b2	eukaryotic translation initiation factor 2B, subunit 2 beta [Source:MarkerSymbol;Acc:MGI:2145118]	GO:0001541(ovarian follicle development);GO:0006412(translation);GO:0006413(translational initiation);GO:0007417(central nervous system development);GO:0008150(biological_process);GO:0014003(oligodendrocyte development);GO:0042552(myelination);GO:0044237(cellular metabolic process);GO:0051716(cellular response to stimulus)	GO:0003743(translation initiation factor activity);GO:0005085(guanyl-nucleotide exchange factor activity);GO:0005515(protein binding);GO:0005524(ATP binding);GO:0005525(GTP binding)	GO:0005737(cytoplasm);GO:0005851(eukaryotic translation initiation factor 2B complex)	433.867	346.099	0.797708	-0.326068			433.867	331.903	0.764989	-0.386489
0610009B10Rik	M200006156									5.68938	3.41477	0.600201	-0.736482			5.68938	2.74119	0.481808	-1.05347		*
Ube3c	M200006139	ENSMUSG00000039000	NM_133907	100763	Ube3c	ubiquitin protein ligase E3C [Source:MarkerSymbol;Acc:MGI:2140998]	GO:0006464(protein modification);GO:0006512(ubiquitin cycle)	GO:0004842(ubiquitin-protein ligase activity);GO:0016874(ligase activity)	GO:0005622(intracellular);GO:0005634(nucleus)	154.888	125.233	0.808539	-0.30661			154.888	94.6473	0.61107	-0.71059
Wdr61	M200006005	ENSMUSG00000061559	NM_023191	0	Wdr61	WD repeat domain 61 [Source:MarkerSymbol;Acc:MGI:1917493]				566.952	450.282	0.794214	-0.3324			566.952	347.1	0.61222	-0.707877
4933402D24Rik	M200010747	ENSMUSG00000025961	XM_129823	74426	4933402D24Rik	RIKEN cDNA 4933402D24 gene [Source:MarkerSymbol;Acc:MGI:1921676]				4.87078	2.96628	0.608995	-0.715499			4.87078	1.40758	0.288985	-1.79093		*
4921524L21Rik	M200010229	ENSMUSG00000039540	XM_128860	0	4921524L21Rik	RIKEN cDNA 4921524L21 gene [Source:MarkerSymbol;Acc:MGI:1918151]				4.34505	3.46663	0.797835	-0.325838			4.34505
Cugbp1	M400000106	ENSMUSG00000005506	NM_017368;NM_198683	0	Cugbp1	CUG triplet repeat, RNA binding protein 1 [Source:MarkerSymbol;Acc:MGI:1342295]	GO:0006376(mRNA splice site selection);GO:0006397(mRNA processing);GO:0007281(germ cell development);GO:0009790(embryonic development);GO:0016246(RNA interference)	GO:0000166(nucleotide binding);GO:0000900(translation repressor activity, nucleic acid binding);GO:0003676(nucleic acid binding);GO:0003723(RNA binding);GO:0042835(BRE binding)	GO:0005625(soluble fraction);GO:0005634(nucleus);GO:0005737(cytoplasm);GO:0030529(ribonucleoprotein complex)	91.5495	55.7291	0.608732	-0.716121			91.5495	95.7563	1.04595	0.0648159
3732413I11Rik	M200009873	ENSMUSG00000019189	XM_203376	74315	3732413I11Rik	RIKEN cDNA 3732413I11 gene [Source:MarkerSymbol;Acc:MGI:1921565]	GO:0006512(ubiquitin cycle)	GO:0004872(receptor activity);GO:0005515(protein binding);GO:0008270(zinc ion binding);GO:0046872(metal ion binding)		435.989	420.946	0.965497	-0.0506568			435.989	158.924	0.364515	-1.45595		*
Gopc	M200009842	ENSMUSG00000019861	NM_053187	94221	Gopc	golgi associated PDZ and coiled-coil motif containing [Source:MarkerSymbol;Acc:MGI:2149946]	GO:0006810(transport);GO:0006914(autophagy);GO:0015031(protein transport);GO:0051260(protein homooligomerization)	GO:0005083(small GTPase regulator activity);GO:0005515(protein binding);GO:0042980(cystic fibrosis transmembrane conductance regulator binding);GO:0050430(syntaxin-6 binding)	GO:0005737(cytoplasm);GO:0005794(Golgi apparatus);GO:0016020(membrane);GO:0019717(synaptosome);GO:0030140(trans-Golgi network transport vesicle)	95.6702	61.5992	0.643871	-0.635157			95.6702	49.0681	0.512888	-0.963283
Pla2g5	M200009678	ENSMUSG00000041193	NM_011110	0	Pla2g5	phospholipase A2, group V [Source:MarkerSymbol;Acc:MGI:101899]	GO:0006644(phospholipid metabolic process);GO:0016042(lipid catabolic process)	GO:0004623(phospholipase A2 activity);GO:0005509(calcium ion binding);GO:0016787(hydrolase activity);GO:0046872(metal ion binding)	GO:0005615(extracellular space)	6.9499	5.14788	0.740712	-0.433015			6.9499	1.55431	0.223645	-2.16072		**
Prima1	M200009651	ENSMUSG00000041669		0	Prima1	proline rich membrane anchor 1 [Source:MarkerSymbol;Acc:MGI:1926097]				4.33158	3.57727	0.825858	-0.276034			4.33158	0.428308	0.0988803	-3.33817		***
Ppp1r1a	M200009474	ENSMUSG00000022490	NM_021391	58200	Ppp1r1a	protein phosphatase 1, regulatory (inhibitor) subunit 1A [Source:MarkerSymbol;Acc:MGI:1889595]	GO:0005975(carbohydrate metabolic process);GO:0005977(glycogen metabolic process);GO:0007165(signal transduction)	GO:0004864(protein phosphatase inhibitor activity);GO:0005515(protein binding)		56.1032	59.4731	1.06007	0.0841544			56.1032	32.878	0.586027	-0.77096
Pigo	M200009451	ENSMUSG00000028454	NM_020035	56703	Pigo	phosphatidylinositol glycan anchor biosynthesis, class O [Source:MarkerSymbol;Acc:MGI:1861452]	GO:0006506(GPI anchor biosynthetic process);GO:0008152(metabolic process);GO:0009117(nucleotide metabolic process)	GO:0003674(molecular_function);GO:0005515(protein binding);GO:0016740(transferase activity);GO:0016780(phosphotransferase activity, for other substituted phosphate groups);GO:0016787(hydrolase activity)	GO:0005783(endoplasmic reticulum);GO:0005789(endoplasmic reticulum membrane);GO:0016020(membrane);GO:0016021(integral to membrane)	37.3696	26.3907	0.706207	-0.501836			37.3696	17.7373	0.474645	-1.07508		*
Hsd3b1	M200009318	ENSMUSG00000027871	NM_008293	0	Hsd3b1	hydroxy-delta-5-steroid dehydrogenase, 3 beta- and steroid delta-isomerase 1 [Source:MarkerSymbol;Acc:MGI:96233]	GO:0006694(steroid biosynthetic process);GO:0006700(C21(steroid hormone biosynthetic process)	GO:0003824(catalytic activity);GO:0003854(3(beta-hydroxy-delta5(steroid dehydrogenase activity);GO:0004769(steroid delta-isomerase activity);GO:0016491(oxidoreductase activity);GO:0016853(isomerase activity)	GO:0005739(mitochondrion);GO:0005783(endoplasmic reticulum);GO:0016020(membrane);GO:0016021(integral to membrane)	5.46263	2.29096	0.419387	-1.25365		*	5.46263	0.736122	0.134756	-2.89158		**
Brpf1	M400000038	ENSMUSG00000001632	NM_030178	78783	Brpf1	bromodomain and PHD finger containing, 1 [Source:MarkerSymbol;Acc:MGI:1926033]	GO:0006118(electron transport);GO:0006355(regulation of transcription, DNA-dependent)	GO:0003676(nucleic acid binding);GO:0003677(DNA binding);GO:0005515(protein binding);GO:0008270(zinc ion binding);GO:0009055(electron carrier activity);GO:0020037(heme binding);GO:0046872(metal ion binding)	GO:0005622(intracellular);GO:0005634(nucleus)	49.5771	35.3716	0.713465	-0.487085			49.5771	12.4964	0.25206	-1.98816		*
Zfp202	M200009056	ENSMUSG00000025602	NM_030713	80902	Zfp202	zinc finger protein 202 [Source:MarkerSymbol;Acc:MGI:1933401]	GO:0006355(regulation of transcription, DNA-dependent)	GO:0003676(nucleic acid binding);GO:0003700(transcription factor activity);GO:0008270(zinc ion binding);GO:0046872(metal ion binding)	GO:0005622(intracellular);GO:0005634(nucleus)	21.2217	14.2387	0.67095	-0.575723			21.2217	14.2973	0.673712	-0.569796
Polr1e	M200009020	ENSMUSG00000028318	NM_022811	64424	Polr1e	polymerase (RNA) I polypeptide E [Source:MarkerSymbol;Acc:MGI:1929022]	GO:0006350(transcription);GO:0009303(rRNA transcription)	GO:0003677(DNA binding);GO:0003899(DNA-directed RNA polymerase activity);GO:0005515(protein binding);GO:0016740(transferase activity);GO:0016779(nucleotidyltransferase activity)	GO:0005634(nucleus);GO:0005730(nucleolus)	106.774	65.7511	0.615796	-0.699477			106.774	72.5265	0.679251	-0.557983
Car5a	M200008819	ENSMUSG00000025317	NM_007608	12352	Car5a	carbonic anhydrase 5a, mitochondrial [Source:MarkerSymbol;Acc:MGI:101946]	GO:0006094(gluconeogenesis);GO:0006730(one-carbon compound metabolic process)	GO:0004089(carbonate dehydratase activity);GO:0008270(zinc ion binding);GO:0016829(lyase activity);GO:0046872(metal ion binding)	GO:0005739(mitochondrion)	8.70819	8.17812	0.939129	-0.090604			8.70819	6.3866	0.733402	-0.447325
4632404H12Rik	M200008798	ENSMUSG00000042579	NM_028726	0	4632404H12Rik	RIKEN cDNA 4632404H12 gene [Source:MarkerSymbol;Acc:MGI:1921284]				36.4104	30.0967	0.826596	-0.274746			36.4104	34.1784	0.938699	-0.0912661
Pde3a	M200008607	ENSMUSG00000041741	NM_018779	0	Pde3a	phosphodiesterase 3A, cGMP inhibited [Source:MarkerSymbol;Acc:MGI:1860764]	GO:0006810(transport);GO:0007165(signal transduction);GO:0008152(metabolic process)	GO:0003824(catalytic activity);GO:0004114(3',5'-cyclic-nucleotide phosphodiesterase activity);GO:0004119(cGMP-inhibited cyclic-nucleotide phosphodiesterase activity);GO:0005215(transporter activity);GO:0016740(transferase activity);GO:0016787(hydrolase activity)	GO:0016020(membrane)	4.21376	2.18344	0.518168	-0.948508			4.21376	0.482002	0.114388	-3.128		***
Zfp354c	M200008587	ENSMUSG00000044807	NM_013922	0	Zfp354c	zinc finger protein 354C [Source:MarkerSymbol;Acc:MGI:1353621]	GO:0006350(transcription);GO:0006355(regulation of transcription, DNA-dependent)	GO:0003676(nucleic acid binding);GO:0003677(DNA binding);GO:0008270(zinc ion binding);GO:0046872(metal ion binding)	GO:0005622(intracellular);GO:0005634(nucleus)	6.746	5.54746	0.822333	-0.282206			6.746	1.54821	0.2295	-2.12343		**
Myo1e	M200008417									220.703	222.701	1.00905	0.0130032			220.703	91.9753	0.416739	-1.26279		*
Ttc26	M300021192	ENSMUSG00000056832	NM_153600	0	Ttc26	tetratricopeptide repeat domain 26 [Source:MarkerSymbol;Acc:MGI:2444853]		GO:0005488(binding)		10.8875	4.59594	0.422129	-1.24424		*	10.8875	6.62958	0.608915	-0.715686
1810026J23Rik	M200008206	ENSMUSG00000048429	NM_178619	69773	1810026J23Rik	RIKEN cDNA 1810026J23 gene [Source:MarkerSymbol;Acc:MGI:1917023]				83.7186	97.2378	1.16148	0.215969			83.7186	46.3829	0.554033	-0.851957
Dyrk3	M200008183	ENSMUSG00000016526	NM_145508	226419	Dyrk3	dual-specificity tyrosine-(Y)-phosphorylation regulated kinase 3 [Source:MarkerSymbol;Acc:MGI:1330300]	GO:0006468(protein amino acid phosphorylation);GO:0018108(peptidyl-tyrosine phosphorylation)	GO:0000166(nucleotide binding);GO:0004674(protein serine/threonine kinase activity);GO:0004713(protein-tyrosine kinase activity);GO:0005524(ATP binding);GO:0016301(kinase activity);GO:0016740(transferase activity)	GO:0005575(cellular_component)	40.0522	21.7373	0.542724	-0.881709			40.0522	52.4103	1.30855	0.387968
Pcgf6	M200008028	ENSMUSG00000025050	NM_027654	71041	Pcgf6	polycomb group ring finger 6 [Source:MarkerSymbol;Acc:MGI:1918291]	GO:0000122(negative regulation of transcription from RNA polymerase II promoter);GO:0006350(transcription);GO:0006355(regulation of transcription, DNA-dependent)	GO:0005515(protein binding);GO:0008270(zinc ion binding);GO:0016564(transcriptional repressor activity);GO:0019904(protein domain specific binding);GO:0046872(metal ion binding)	GO:0005634(nucleus)	83.4212	57.5623	0.690021	-0.535289			83.4212	93.7257	1.12352	0.168031
0610040J01Rik	M200008012	ENSMUSG00000060512	NM_029554	76261	0610040J01Rik	RIKEN cDNA 0610040J01 gene [Source:MarkerSymbol;Acc:MGI:1923511]				7.67729	5.99402	0.780747	-0.357073			7.67729	4.53758	0.591039	-0.758674
Csrp2bp	M200013965	ENSMUSG00000027425	NM_181417	674229	Csrp2bp	cysteine and glycine-rich protein 2 binding protein [Source:MarkerSymbol;Acc:MGI:1917264]	GO:0008150(biological_process);GO:0008152(metabolic process)	GO:0003674(molecular_function);GO:0008080(N-acetyltransferase activity)	GO:0005575(cellular_component)	82.4037	49.9375	0.606011	-0.722584			82.4037	47.8719	0.580944	-0.783528
Gabrg2	M400000389									37.6825	29.0347	0.770507	-0.376119			37.6825	17.3016	0.459142	-1.12299		*
1300012G16Rik	M200013765	ENSMUSG00000029598	NM_023625	0	1300012G16Rik	RIKEN cDNA 1300012G16 gene [Source:MarkerSymbol;Acc:MGI:1919022]	GO:0008150(biological_process)	GO:0003674(molecular_function)	GO:0005615(extracellular space);GO:0005764(lysosome);GO:0016021(integral to membrane)	76.0834	66.6435	0.875926	-0.191118			76.0834	41.1231	0.5405	-0.887634
Rabl5	M200013746	ENSMUSG00000007987	NM_026073	67286	Rabl5	RAB, member of RAS oncogene family-like 5 [Source:MarkerSymbol;Acc:MGI:1914536]		GO:0000166(nucleotide binding);GO:0005525(GTP binding)		122.741	129.208	1.05269	0.0740849			122.741	55.0724	0.448689	-1.15621		*
Abtb1	M200013604	ENSMUSG00000030083	NM_030251	0	Abtb1	ankyrin repeat and BTB (POZ) domain containing 1 [Source:MarkerSymbol;Acc:MGI:1933148]	GO:0006355(regulation of transcription, DNA-dependent);GO:0006412(translation);GO:0009401(phosphoenolpyruvate-dependent sugar phosphotransferase system)	GO:0003677(DNA binding);GO:0003700(transcription factor activity);GO:0003746(translation elongation factor activity);GO:0005351(sugar porter activity);GO:0005515(protein binding)		65.7045	90.6312	1.37937	0.464015			65.7045	43.0862	0.655757	-0.608768
Irak1bp1	M200013585	ENSMUSG00000032251	NM_022986	0	Irak1bp1	interleukin-1 receptor-associated kinase 1 binding protein 1 [Source:MarkerSymbol;Acc:MGI:1929475]	GO:0007249(I-kappaB kinase/NF-kappaB cascade)	GO:0004872(receptor activity);GO:0005515(protein binding);GO:0016301(kinase activity)	GO:0005575(cellular_component)	217.294	169.004	0.777767	-0.36259			217.294	128.858	0.593011	-0.753868
Solh	M200013410	ENSMUSG00000037326	NM_015830	50817	Solh	small optic lobes homolog (Drosophila) [Source:MarkerSymbol;Acc:MGI:1355075]	GO:0006508(proteolysis)	GO:0004197(cysteine-type endopeptidase activity);GO:0004198(calpain activity);GO:0008233(peptidase activity);GO:0008234(cysteine-type peptidase activity);GO:0008270(zinc ion binding);GO:0016787(hydrolase activity);GO:0046872(metal ion binding)	GO:0005622(intracellular)	8.28491	4.25854	0.514011	-0.960128			8.28491	1.76191	0.212665	-2.23334		**
1700019H03Rik	M200013361	ENSMUSG00000023393	NM_183161	0	1700019H03Rik	RIKEN cDNA 1700019H03 gene [Source:MarkerSymbol;Acc:MGI:1919107]				7.90595	7.05691	0.892608	-0.163901			7.90595	4.2287	0.534876	-0.902724
Ero1l	M200013120	ENSMUSG00000021831	NM_015774;XM_489197	50527	Ero1l	ERO1-like (S. cerevisiae) [Source:MarkerSymbol;Acc:MGI:1354385]	GO:0006118(electron transport);GO:0006457(protein folding);GO:0006810(transport);GO:0030968(unfolded protein response)	GO:0016491(oxidoreductase activity)	GO:0005783(endoplasmic reticulum);GO:0016020(membrane);GO:0030176(integral to endoplasmic reticulum membrane)	203.441	80.886	0.39759	-1.33065		*	203.441	368.599	1.81183	0.857444
Akap1	M400000291	ENSMUSG00000018428	NM_009648	0	Akap1	A kinase (PRKA) anchor protein 1 [Source:MarkerSymbol;Acc:MGI:104729]		GO:0003676(nucleic acid binding);GO:0003723(RNA binding);GO:0016301(kinase activity)	GO:0005615(extracellular space);GO:0005739(mitochondrion);GO:0005783(endoplasmic reticulum);GO:0016020(membrane);GO:0016021(integral to membrane);GO:0019867(outer membrane)	17.2562	12.5457	0.727023	-0.459927			17.2562	12.0156	0.696302	-0.522215
Pitpnb	M200012906	ENSMUSG00000050017	NM_019640	0	Pitpnb	phosphatidylinositol transfer protein, beta [Source:MarkerSymbol;Acc:MGI:1927542]				321.285	185.419	0.577117	-0.793065			321.285	26.8766	0.0836534	-3.57943		***
Kif23	M200012880	ENSMUSG00000032254	NM_024245	0	Kif23	kinesin family member 23 [Source:MarkerSymbol;Acc:MGI:1919069]	GO:0007018(microtubule-based movement)	GO:0000166(nucleotide binding);GO:0003774(motor activity);GO:0003777(microtubule motor activity);GO:0005524(ATP binding)	GO:0005874(microtubule);GO:0005875(microtubule associated complex)	153.637	58.7363	0.382306	-1.3872		*	153.637	64.1379	0.417464	-1.26028		*
Csrp1	M200012670	ENSMUSG00000026421	NM_007791	0	Csrp1	cysteine and glycine-rich protein 1 [Source:MarkerSymbol;Acc:MGI:88549]				1443.03	1373.43	0.951767	-0.0713193			1443.03	566.624	0.392663	-1.34864		*
-	M200012636									345.231	327.321	0.948123	-0.0768545			345.231	216.191	0.62622	-0.675258
Dalrd3	M200012255	ENSMUSG00000019039		67789	Dalrd3	DALR anticodon binding domain containing 3 [Source:MarkerSymbol;Acc:MGI:1915039]	GO:0006420(arginyl-tRNA aminoacylation)	GO:0004812(aminoacyl-tRNA ligase activity);GO:0004814(arginine-tRNA ligase activity);GO:0005524(ATP binding)		109.26	118.216	1.08197	0.113655			109.26	57.9169	0.530082	-0.915712
Tex13	M200012228	ENSMUSG00000042386	NM_031381	83555	Tex13	testis expressed gene 13 [Source:MarkerSymbol;Acc:MGI:1890544]				12.4223	10.6484	0.857205	-0.222289			12.4223	10.2822	0.82772	-0.272786
2400006N03Rik	M200012041									134.589	148.977	1.10691	0.146533			134.589	70.9223	0.526955	-0.924249
XP_919537.1	M400000194									4.56443	2.6898	0.589296	-0.762937			4.56443	1.40758	0.308381	-1.69722		*
0610037L13Rik	M200011816									48.9997	43.5995	0.889791	-0.168461			48.9997	26.5045	0.540911	-0.886536
1500009M05Rik	M200011782									45.5486	27.525	0.6043	-0.726663			45.5486	25.0707	0.550415	-0.861408
8030411F24Rik	M200011467	ENSMUSG00000027444	XM_130383	78609	8030411F24Rik	RIKEN cDNA 8030411F24 gene [Source:MarkerSymbol;Acc:MGI:1925859]		GO:0004869(cysteine protease inhibitor activity)	GO:0005615(extracellular space)	215.514	87.2233	0.404723	-1.30499		*	215.514	162.543	0.754213	-0.406956
A930021C24Rik	M200011380	ENSMUSG00000042655	XM_127537	77803	A930021C24Rik	RIKEN cDNA A930021C24 gene [Source:MarkerSymbol;Acc:MGI:1925053]				4.1672	1.95525	0.4692	-1.09172		*	4.1672	1.80843	0.433968	-1.20434		*
Rnf24	M200010838	ENSMUSG00000048911	NM_178607	51902	Rnf24	ring finger protein 24 [Source:MarkerSymbol;Acc:MGI:1261771]	GO:0006512(ubiquitin cycle);GO:0008150(biological_process)	GO:0003674(molecular_function);GO:0005515(protein binding);GO:0008270(zinc ion binding);GO:0046872(metal ion binding)	GO:0005575(cellular_component)	5.00118	2.45991	0.491867	-1.02366		*	5.00118	2.03756	0.407416	-1.29543		*
Lpin2	M400000714									29.2327	28.6463	0.979938	-0.0292384			29.2327	22.0613	0.754679	-0.406064
Smc6l1	M200016317									357.137	215.973	0.604735	-0.725625			357.137	308.646	0.864222	-0.210527
Zdhhc4	M200016282	ENSMUSG00000001844	NM_028379	72881	Zdhhc4	zinc finger, DHHC domain containing 4 [Source:MarkerSymbol;Acc:MGI:1920131]				198.535	188.585	0.949885	-0.0741753			198.535	167.103	0.841679	-0.248658
4930427A07Rik	M200016078	ENSMUSG00000037466	NM_134041	100047736	4930427A07Rik	RIKEN cDNA 4930427A07 gene [Source:MarkerSymbol;Acc:MGI:2144738]				63.3133	22.8635	0.361117	-1.46946		*	63.3133	23.7554	0.375204	-1.41425		*
Akt3	M200016059	ENSMUSG00000019699	NM_011785	23797	Akt3	thymoma viral proto-oncogene 3 [Source:MarkerSymbol;Acc:MGI:1345147]	GO:0006468(protein amino acid phosphorylation)	GO:0000166(nucleotide binding);GO:0004672(protein kinase activity);GO:0004674(protein serine/threonine kinase activity);GO:0005515(protein binding);GO:0005524(ATP binding);GO:0016301(kinase activity);GO:0016740(transferase activity)		56.222	33.4031	0.594128	-0.751153			56.222	29.8304	0.530582	-0.914353
Camkk2	M200015884	ENSMUSG00000029471	NM_145358	207565	Camkk2	calcium/calmodulin-dependent protein kinase kinase 2, beta [Source:MarkerSymbol;Acc:MGI:2444812]	GO:0006468(protein amino acid phosphorylation);GO:0046777(protein amino acid autophosphorylation)	GO:0000166(nucleotide binding);GO:0004672(protein kinase activity);GO:0004674(protein serine/threonine kinase activity);GO:0004685(calcium- and calmodulin-dependent protein kinase activity);GO:0005509(calcium ion binding);GO:0005516(calmodulin binding);GO:0005524(ATP binding);GO:0016301(kinase activity);GO:0016740(transferase activity)		64.7411	50.7791	0.784341	-0.350448			64.7411	23.5932	0.364424	-1.45631		*
Tbc1d21	M200015859	ENSMUSG00000036244	XM_134945	74286	Tbc1d21	TBC1 domain family, member 21 [Source:MarkerSymbol;Acc:MGI:1921536]	GO:0032313(regulation of Rab GTPase activity)	GO:0005097(Rab GTPase activator activity)	GO:0005622(intracellular)	5.64794	4.481	0.793386	-0.333905			5.64794	2.10454	0.37262	-1.42422		*
Zfp687	M200015665	ENSMUSG00000019338	NM_030074	0	Zfp687	zinc finger protein 687 [Source:MarkerSymbol;Acc:MGI:1925516]	GO:0006350(transcription);GO:0006355(regulation of transcription, DNA-dependent)	GO:0003676(nucleic acid binding);GO:0003677(DNA binding);GO:0008270(zinc ion binding);GO:0046872(metal ion binding)	GO:0005622(intracellular);GO:0005634(nucleus)	62.7573	46.181	0.735866	-0.442485			62.7573	36.8517	0.587209	-0.768053
Mtss1	M400000568	ENSMUSG00000022353	NM_144800	211401	Mtss1	metastasis suppressor 1 [Source:MarkerSymbol;Acc:MGI:2384818]	GO:0006928(cell motility);GO:0007015(actin filament organization);GO:0007155(cell adhesion);GO:0007169(transmembrane receptor protein tyrosine kinase signaling pathway);GO:0007399(nervous system development);GO:0007517(muscle development);GO:0030035(microspike biogenesis);GO:0030041(actin filament polymerization)	GO:0003779(actin binding);GO:0003785(actin monomer binding);GO:0005102(receptor binding)	GO:0001726(ruffle);GO:0005737(cytoplasm);GO:0005856(cytoskeleton);GO:0015629(actin cytoskeleton);GO:0030139(endocytic vesicle)	54.085	27.5118	0.508678	-0.975177			54.085	27.7828	0.513687	-0.96104
Tusc3	M200015414	ENSMUSG00000039530	NM_030254	80286	Tusc3	tumor suppressor candidate 3 [Source:MarkerSymbol;Acc:MGI:1933134]	GO:0018279(protein amino acid N-linked glycosylation via asparagine)	GO:0004579(dolichyl-diphosphooligosaccharide-protein glycotransferase activity)	GO:0005615(extracellular space);GO:0005739(mitochondrion);GO:0008250(oligosaccharyl transferase complex);GO:0016021(integral to membrane)	577.155	474.154	0.821536	-0.283605			577.155	200.874	0.348042	-1.52267		*
Slc35d3	M200015374	ENSMUSG00000050473	XM_125515	76157	Slc35d3	solute carrier family 35, member D3 [Source:MarkerSymbol;Acc:MGI:1923407]				30.606	23.7023	0.774431	-0.368791			30.606	11.8914	0.388532	-1.3639		*
Efhc2	M200015181	ENSMUSG00000025038	XM_135814	74405	Efhc2	EF-hand domain (C-terminal) containing 2 [Source:MarkerSymbol;Acc:MGI:1921655]		GO:0005509(calcium ion binding)		4.61607	2.74041	0.593669	-0.75227			4.61607	2.07797	0.450161	-1.15149		*
Fbxo16	M200015151	ENSMUSG00000034532	NM_015795	50759	Fbxo16	F-box protein 16 [Source:MarkerSymbol;Acc:MGI:1354706]	GO:0006512(ubiquitin cycle)			154.623	165.805	1.07232	0.100735			154.623	310.958	2.01108	1.00797	*
Hoxd12	M200014937	ENSMUSG00000001823	NM_008274	15432	Hoxd12	homeo box D12 [Source:MarkerSymbol;Acc:MGI:96204]	GO:0001501(skeletal development);GO:0006350(transcription);GO:0006355(regulation of transcription, DNA-dependent);GO:0007275(multicellular organismal development);GO:0007389(pattern specification process);GO:0009887(organ morphogenesis);GO:0045449(regulation of transcription)	GO:0003677(DNA binding);GO:0003700(transcription factor activity);GO:0043565(sequence-specific DNA binding)	GO:0005634(nucleus);GO:0005667(transcription factor complex)	4.29756	1.67209	0.389079	-1.36187		*	4.29756
Rhpn1	M200014910	ENSMUSG00000022580	NM_008164	14787	Rhpn1	rhophilin, Rho GTPase binding protein 1 [Source:MarkerSymbol;Acc:MGI:1098783]	GO:0007165(signal transduction)	GO:0005083(small GTPase regulator activity);GO:0005515(protein binding)	GO:0005622(intracellular)	19.2473	16.9745	0.881918	-0.181284			19.2473	10.9244	0.567579	-0.817106
Arx	M200014722	ENSMUSG00000035277	NM_007492	0	Arx	aristaless related homeobox gene (Drosophila) [Source:MarkerSymbol;Acc:MGI:1097716]	GO:0001764(neuron migration);GO:0006350(transcription);GO:0006355(regulation of transcription, DNA-dependent);GO:0007275(multicellular organismal development);GO:0030900(forebrain development);GO:0042127(regulation of cell proliferation);GO:0045449(regulation of transcription)	GO:0003677(DNA binding);GO:0003700(transcription factor activity);GO:0043565(sequence-specific DNA binding)	GO:0005634(nucleus);GO:0005667(transcription factor complex)	75.2164	77.0638	1.02456	0.0350074			75.2164	69.347	0.921968	-0.117212
Sfrs5	M400000441	ENSMUSG00000070729;ENSMUSG00000021134		622469	Sfrs5	splicing factor, arginine/serine-rich 5 (SRp40, HRS) [Source:MarkerSymbol;Acc:MGI:98287]	GO:0006350(transcription);GO:0006355(regulation of transcription, DNA-dependent);GO:0006376(mRNA splice site selection);GO:0006397(mRNA processing);GO:0008380(RNA splicing)	GO:0000166(nucleotide binding);GO:0003676(nucleic acid binding);GO:0003723(RNA binding)	GO:0005634(nucleus);GO:0005681(spliceosome)	944.453	535.69	0.567197	-0.818079			944.453	663.515	0.70254	-0.509348
Nenf	M200014515	ENSMUSG00000037499	NM_025424	66208	Nenf	neuron derived neurotrophic factor [Source:MarkerSymbol;Acc:MGI:1913458]	GO:0043410(positive regulation of MAPKKK cascade)	GO:0008083(growth factor activity);GO:0020037(heme binding);GO:0046914(transition metal ion binding)	GO:0005615(extracellular space)	328.696	466.52	1.4193	0.505184			328.696	223.455	0.679822	-0.556771
Psca	M200014493	ENSMUSG00000022598	NM_028216	72373	Psca	prostate stem cell antigen [Source:MarkerSymbol;Acc:MGI:1919623]		GO:0048503(GPI anchor binding)	GO:0005615(extracellular space);GO:0016020(membrane)	6.42096	7.2206	1.12454	0.16933			6.42096	0.730016	0.113693	-3.13679		***
Acoxl	M200014326	ENSMUSG00000027380	NM_028765	0	Acoxl	acyl-Coenzyme A oxidase-like [Source:MarkerSymbol;Acc:MGI:1921371]	GO:0006118(electron transport);GO:0006605(protein targeting);GO:0006631(fatty acid metabolic process);GO:0006635(fatty acid beta-oxidation)	GO:0003995(acyl-CoA dehydrogenase activity);GO:0003997(acyl-CoA oxidase activity);GO:0008083(growth factor activity);GO:0050660(FAD binding)	GO:0005777(peroxisome)	9.30005	8.29114	0.891515	-0.165669			9.30005	7.56019	0.81292	-0.298815
Mcm8	M200014306	ENSMUSG00000027353	NM_025676	0	Mcm8	minichromosome maintenance deficient 8 (S. cerevisiae) [Source:MarkerSymbol;Acc:MGI:1913884]	GO:0006260(DNA replication);GO:0006270(DNA replication initiation);GO:0006350(transcription);GO:0006355(regulation of transcription, DNA-dependent);GO:0007049(cell cycle)	GO:0000166(nucleotide binding);GO:0003677(DNA binding);GO:0005524(ATP binding);GO:0008094(DNA-dependent ATPase activity);GO:0017111(nucleoside-triphosphatase activity)	GO:0005634(nucleus)	25.1532	10.8714	0.432206	-1.21021		*	25.1532	17.5895	0.699296	-0.516026
-	M200014154									3.80297	2.01068	0.528714	-0.919441			3.80297
Slc25a29	M200014127	ENSMUSG00000021265	NM_181328	214663	Slc25a29	solute carrier family 25 (mitochondrial carrier, palmitoylcarnitine transporter), member 29 [Source:MarkerSymbol;Acc:MGI:2444911]	GO:0006810(transport);GO:0006844(acyl carnitine transport)	GO:0005215(transporter activity);GO:0005488(binding);GO:0015227(acyl carnitine transporter activity)	GO:0005739(mitochondrion);GO:0005743(mitochondrial inner membrane);GO:0016020(membrane);GO:0016021(integral to membrane)	20.689	35.9226	1.73632	0.79603			20.689	17.6493	0.853077	-0.229252
2700060E02Rik	M300002960	ENSMUSG00000021807	NM_026528	545536	2700060E02Rik	RIKEN cDNA 2700060E02 gene [Source:MarkerSymbol;Acc:MGI:1915295]			GO:0005634(nucleus)	2090.46	2539.65	1.21488	0.280811			2090.46	1461.46	0.699111	-0.516406
Ppwd1	M300002917	ENSMUSG00000021713	NM_172807	238831	Ppwd1	peptidylprolyl isomerase domain and WD repeat containing 1 [Source:MarkerSymbol;Acc:MGI:2443069]	GO:0006397(mRNA processing);GO:0006457(protein folding);GO:0008380(RNA splicing)	GO:0003755(peptidyl-prolyl cis-trans isomerase activity);GO:0016853(isomerase activity)	GO:0005681(spliceosome)	113.516	62.987	0.554873	-0.84977			113.516	51.9015	0.457217	-1.12905		*
2810455K09Rik	M300002657	ENSMUSG00000021271	XM_138271	72805	2810455K09Rik	RIKEN cDNA 2810455K09 gene [Source:MarkerSymbol;Acc:MGI:1920055]		GO:0003676(nucleic acid binding);GO:0008270(zinc ion binding)	GO:0005622(intracellular)	13.4788	13.0472	0.967981	-0.0469491			13.4788	8.08782	0.60004	-0.73687
Acot2	M300002637	ENSMUSG00000021226	NM_134188	171210	Acot2	acyl-CoA thioesterase 2 [Source:MarkerSymbol;Acc:MGI:2159605]	GO:0006629(lipid metabolic process);GO:0006637(acyl-CoA metabolic process)	GO:0004759(serine esterase activity);GO:0016290(palmitoyl-CoA hydrolase activity);GO:0016291(acyl-CoA thioesterase activity);GO:0016787(hydrolase activity)	GO:0005739(mitochondrion)	22.3942	21.0695	0.940844	-0.0879727			22.3942	34.8942	1.55818	0.639861
Blmh	M300002423	ENSMUSG00000020840	NM_178645	104184	Blmh	bleomycin hydrolase [Source:MarkerSymbol;Acc:MGI:1345186]	GO:0006508(proteolysis);GO:0009636(response to toxin);GO:0042493(response to drug)	GO:0004197(cysteine-type endopeptidase activity);GO:0008233(peptidase activity);GO:0008234(cysteine-type peptidase activity);GO:0008423(bleomycin hydrolase activity);GO:0016787(hydrolase activity)	GO:0005625(soluble fraction)	436.863	363.509	0.83209	-0.265189			436.863	184.334	0.421951	-1.24485		*
Slc13a5	M300002400	ENSMUSG00000020805	NM_001004148	100046128	Slc13a5	solute carrier family 13 (sodium-dependent citrate transporter), member 5 [Source:MarkerSymbol;Acc:MGI:3037150]	GO:0006810(transport);GO:0006811(ion transport);GO:0006814(sodium ion transport);GO:0006842(tricarboxylic acid transport);GO:0015744(succinate transport);GO:0015746(citrate transport)	GO:0005215(transporter activity);GO:0015137(citrate transporter activity);GO:0015141(succinate transporter activity);GO:0015142(tricarboxylic acid transporter activity);GO:0015293(symporter activity);GO:0031402(sodium ion binding)	GO:0005886(plasma membrane);GO:0016020(membrane);GO:0016021(integral to membrane)	7.88218	6.3303	0.803115	-0.316321			7.88218	4.28346	0.543437	-0.879816
Cdkl3	M300002161	ENSMUSG00000020389		0	Cdkl3	cyclin-dependent kinase-like 3 [Source:MarkerSymbol;Acc:MGI:2388268]	GO:0006468(protein amino acid phosphorylation)	GO:0000166(nucleotide binding);GO:0004672(protein kinase activity);GO:0004674(protein serine/threonine kinase activity);GO:0004713(protein-tyrosine kinase activity);GO:0005524(ATP binding);GO:0016301(kinase activity);GO:0016740(transferase activity)		6.27196	4.25469	0.678366	-0.559864			6.27196	2.43337	0.387977	-1.36596		*
Creb1	M400000875	ENSMUSG00000025958	NM_133828	0	Creb1	cAMP responsive element binding protein 1 [Source:MarkerSymbol;Acc:MGI:88494]	GO:0006350(transcription);GO:0006355(regulation of transcription, DNA-dependent);GO:0007409(axonogenesis);GO:0008361(regulation of cell size)	GO:0003677(DNA binding);GO:0003700(transcription factor activity);GO:0005515(protein binding);GO:0043565(sequence-specific DNA binding);GO:0046983(protein dimerization activity)	GO:0005634(nucleus);GO:0005667(transcription factor complex)	20.6867	10.4226	0.503829	-0.988994			20.6867	4.6439	0.224487	-2.1553		**
BC004690	M300001922									4.76511	2.96769	0.622796	-0.683169			4.76511	8.66624	1.81869	0.862896
Slc6a15	M300001879	ENSMUSG00000019894	NM_175328	103098	Slc6a15	solute carrier family 6 (neurotransmitter transporter), member 15 [Source:MarkerSymbol;Acc:MGI:2143484]	GO:0006810(transport);GO:0006836(neurotransmitter transport)	GO:0005328(neurotransmitter:sodium symporter activity);GO:0015293(symporter activity)	GO:0005887(integral to plasma membrane);GO:0016020(membrane);GO:0016021(integral to membrane)	4.51689	2.79755	0.619352	-0.691168			4.51689	1.045	0.231355	-2.11182		**
Sfrs1	M300001664	ENSMUSG00000018379	NM_173374	110809	Sfrs1	splicing factor, arginine/serine-rich 1 (ASF/SF2) [Source:MarkerSymbol;Acc:MGI:98283]	GO:0000398(nuclear mRNA splicing, via spliceosome);GO:0006376(mRNA splice site selection);GO:0006397(mRNA processing);GO:0006605(protein targeting);GO:0008380(RNA splicing)	GO:0000166(nucleotide binding);GO:0003676(nucleic acid binding);GO:0003723(RNA binding);GO:0031202(RNA splicing factor activity, transesterification mechanism)	GO:0005634(nucleus);GO:0005681(spliceosome)	757.72	341.754	0.45103	-1.14871		*	757.72	502.34	0.662962	-0.593002
Baiap2l2	M300001636	ENSMUSG00000018126	NM_177580	207495	Baiap2l2	BAI1-associated protein 2-like 2 [Source:MarkerSymbol;Acc:MGI:2652819]				9.0836	5.37567	0.591799	-0.756821			9.0836	4.75129	0.523062	-0.934946
Gzmb	M300001410	ENSMUSG00000015437		14939	Gzmb	granzyme B [Source:MarkerSymbol;Acc:MGI:109267]	GO:0006508(proteolysis);GO:0006915(apoptosis);GO:0008626(induction of apoptosis by granzyme);GO:0019835(cytolysis)	GO:0004252(serine-type endopeptidase activity);GO:0004263(chymotrypsin activity);GO:0004278(granzyme B activity);GO:0005515(protein binding);GO:0008233(peptidase activity);GO:0016787(hydrolase activity)	GO:0005615(extracellular space)	21.4164	15.4574	0.721755	-0.470419			21.4164	24.3189	1.13553	0.183364
Hmgb3	M300001378	ENSMUSG00000015217	NM_008253	0	Hmgb3	high mobility group box 3 [Source:MarkerSymbol;Acc:MGI:1098219]	GO:0006323(DNA packaging);GO:0006355(regulation of transcription, DNA-dependent);GO:0045578(negative regulation of B cell differentiation);GO:0045638(negative regulation of myeloid cell differentiation)	GO:0003677(DNA binding)	GO:0000785(chromatin);GO:0005634(nucleus);GO:0005694(chromosome)	913.037	383.731	0.42028	-1.25058		*	913.037	314.034	0.343944	-1.53975		*
1700049J03Rik	M300001121	ENSMUSG00000011052		0	1700049J03Rik	RIKEN cDNA 1700049J03 gene [Source:MarkerSymbol;Acc:MGI:1920615]				4.06891	4.64395	1.14133	0.190712			4.06891	2.28557	0.561716	-0.832086
Dnmbp	M400000803	ENSMUSG00000025195	NM_028029	71972	Dnmbp	dynamin binding protein [Source:MarkerSymbol;Acc:MGI:1917352]	GO:0007242(intracellular signaling cascade);GO:0035023(regulation of Rho protein signal transduction)	GO:0005085(guanyl-nucleotide exchange factor activity);GO:0005089(Rho guanyl-nucleotide exchange factor activity);GO:0005515(protein binding)	GO:0005622(intracellular);GO:0005737(cytoplasm);GO:0005856(cytoskeleton)	16.304	12.5455	0.769473	-0.378058			16.304	13.3672	0.819875	-0.286524
Haghl	M300000902	ENSMUSG00000061046	NM_026897	68977	Haghl	hydroxyacylglutathione hydrolase-like [Source:MarkerSymbol;Acc:MGI:1919877]		GO:0016787(hydrolase activity)		76.3372	109.52	1.43469	0.520734			76.3372	32.6882	0.428208	-1.22362		*
1110036O03Rik	M300000865	ENSMUSG00000006931	NM_176830	66180	1110036O03Rik	RIKEN cDNA 1110036O03 gene [Source:MarkerSymbol;Acc:MGI:1913430]			GO:0005634(nucleus)	754.916	911.623	1.20758	0.272121			754.916	201.663	0.267133	-1.90437		*
Fgfr4	M300000661	ENSMUSG00000005320		14186	Fgfr4	fibroblast growth factor receptor 4 [Source:MarkerSymbol;Acc:MGI:95525]	GO:0001759(induction of an organ);GO:0006468(protein amino acid phosphorylation);GO:0007165(signal transduction);GO:0030324(lung development)	GO:0000166(nucleotide binding);GO:0004672(protein kinase activity);GO:0004674(protein serine/threonine kinase activity);GO:0004713(protein-tyrosine kinase activity);GO:0004872(receptor activity);GO:0005007(fibroblast growth factor receptor activity);GO:0005524(ATP binding);GO:0016301(kinase activity);GO:0016740(transferase activity)	GO:0005615(extracellular space);GO:0016020(membrane);GO:0016021(integral to membrane)	4.27057	5.43489	1.27264	0.347822			4.27057	1.2465	0.291881	-1.77655		*
1200003C05Rik	M300000633	ENSMUSG00000005078	NM_024205	0	1200003C05Rik	RIKEN cDNA 1200003C05 gene [Source:MarkerSymbol;Acc:MGI:1915057]				162.448	158.799	0.977539	-0.032774			162.448	109.577	0.674536	-0.568032
Foxj2	M300000382	ENSMUSG00000003154	NM_021899	60611	Foxj2	forkhead box J2 [Source:MarkerSymbol;Acc:MGI:1926805]	GO:0006350(transcription);GO:0006355(regulation of transcription, DNA-dependent)	GO:0003677(DNA binding);GO:0003700(transcription factor activity);GO:0043565(sequence-specific DNA binding)	GO:0005634(nucleus)	31.2104	24.546	0.786468	-0.34654			31.2104	27.4223	0.878628	-0.186676
Map2k7	M300000350	ENSMUSG00000002948	NM_011944	0	Map2k7	mitogen activated protein kinase kinase 7 [Source:MarkerSymbol;Acc:MGI:1346871]	GO:0006468(protein amino acid phosphorylation);GO:0006950(response to stress);GO:0051403(stress-activated MAPK cascade)	GO:0000166(nucleotide binding);GO:0000287(magnesium ion binding);GO:0004672(protein kinase activity);GO:0004674(protein serine/threonine kinase activity);GO:0004708(MAP kinase kinase activity);GO:0004713(protein-tyrosine kinase activity);GO:0005515(protein binding);GO:0005524(ATP binding);GO:0016301(kinase activity);GO:0016740(transferase activity);GO:0046872(metal ion binding)	GO:0005634(nucleus);GO:0005737(cytoplasm)	90.6523	59.923	0.66102	-0.597235			90.6523	52.5945	0.580178	-0.785434
Gabrg1	M300000171	ENSMUSG00000001260	NM_010252	14405	Gabrg1	gamma-aminobutyric acid (GABA-A) receptor, subunit gamma 1 [Source:MarkerSymbol;Acc:MGI:103156]	GO:0006457(protein folding);GO:0006810(transport);GO:0006811(ion transport);GO:0006821(chloride transport);GO:0007214(gamma-aminobutyric acid signaling pathway);GO:0007268(synaptic transmission)	GO:0004872(receptor activity);GO:0004890(GABA-A receptor activity);GO:0005216(ion channel activity);GO:0005230(extracellular ligand-gated ion channel activity);GO:0005254(chloride channel activity);GO:0030594(neurotransmitter receptor activity);GO:0031404(chloride ion binding)	GO:0005887(integral to plasma membrane);GO:0016020(membrane);GO:0016021(integral to membrane);GO:0045211(postsynaptic membrane)	3.48921	2.01091	0.576322	-0.795052			3.48921	1.17952	0.338049	-1.5647		*
Exosc3	M300006045	ENSMUSG00000028322	NM_025513	0	Exosc3	exosome component 3 [Source:MarkerSymbol;Acc:MGI:1913612]	GO:0006364(rRNA processing)	GO:0003723(RNA binding);GO:0004518(nuclease activity);GO:0004527(exonuclease activity);GO:0005515(protein binding);GO:0016787(hydrolase activity)	GO:0000176(nuclear exosome (RNase complex));GO:0000177(cytoplasmic exosome (RNase complex));GO:0000178(exosome (RNase complex));GO:0005634(nucleus)	281.34	186.487	0.662853	-0.59324			281.34	48.5301	0.172497	-2.53536		**
Ccnl1	M300005804	ENSMUSG00000027829	NM_019937	56706	Ccnl1	cyclin L1 [Source:MarkerSymbol;Acc:MGI:1922664]	GO:0000074(regulation of progression through cell cycle);GO:0006350(transcription);GO:0006355(regulation of transcription, DNA-dependent);GO:0008150(biological_process)	GO:0003674(molecular_function)	GO:0005634(nucleus);GO:0008023(transcription elongation factor complex)	124.321	82.6704	0.664974	-0.58863			124.321	97.8677	0.787216	-0.345169
Kpna4	M300005777	ENSMUSG00000027782	NM_008467	16649	Kpna4	karyopherin (importin) alpha 4 [Source:MarkerSymbol;Acc:MGI:1100848]				93.4836	19.6229	0.209907	-2.25218		**	93.4836	21.081	0.225505	-2.14877		**
Ttbk1	M300005560									14.5708	7.61559	0.522662	-0.936049			14.5708	5.053	0.34679	-1.52787		*
Syt13	M300005520	ENSMUSG00000027220	NM_030725	80976	Syt13	synaptotagmin XIII [Source:MarkerSymbol;Acc:MGI:1933945]	GO:0006810(transport);GO:0016192(vesicle-mediated transport)	GO:0005215(transporter activity)	GO:0005615(extracellular space);GO:0005887(integral to plasma membrane);GO:0008021(synaptic vesicle);GO:0016020(membrane);GO:0016021(integral to membrane);GO:0030133(transport vesicle)	907.154	729.206	0.803838	-0.315023			907.154	304.367	0.335518	-1.57554		*
-	M300005301									177.915	145.626	0.818515	-0.28892			177.915	36.6268	0.205867	-2.28022		**
Itga8	M300005272	ENSMUSG00000026768	NM_001001309	241226	Itga8	integrin alpha 8 [Source:MarkerSymbol;Acc:MGI:109442]	GO:0007155(cell adhesion);GO:0007160(cell-matrix adhesion);GO:0007229(integrin-mediated signaling pathway);GO:0007613(memory);GO:0030030(cell projection organization and biogenesis);GO:0030198(extracellular matrix organization and biogenesis);GO:0042472(inner ear morphogenesis)	GO:0004872(receptor activity);GO:0005515(protein binding)	GO:0008305(integrin complex);GO:0016021(integral to membrane);GO:0045177(apical part of cell)	35.1335	26.1183	0.743402	-0.427786			35.1335	14.2569	0.405793	-1.30118		*
Clasp1	M300005066	ENSMUSG00000064302		76707	Clasp1	CLIP associating protein 1 [Source:MarkerSymbol;Acc:MGI:1923957]	GO:0001578(microtubule bundle formation);GO:0007026(negative regulation of microtubule depolymerization);GO:0007049(cell cycle);GO:0007067(mitosis);GO:0051301(cell division)	GO:0005488(binding);GO:0005515(protein binding);GO:0008017(microtubule binding);GO:0043515(kinetochore binding);GO:0051010(microtubule plus-end binding)	GO:0000776(kinetochore);GO:0005794(Golgi apparatus);GO:0005813(centrosome);GO:0005856(cytoskeleton);GO:0005874(microtubule);GO:0005881(cytoplasmic microtubule);GO:0030981(cortical microtubule cytoskeleton)	78.4997	90.9249	1.15828	0.211989			78.4997	21.9486	0.279601	-1.83856		*
Ugt1a6a	M300005020	ENSMUSG00000054545	NM_145079;NM_201410	100048293	Ugt1a6a	UDP glucuronosyltransferase 1 family, polypeptide A7C [Source:MarkerSymbol;Acc:MGI:3032636]	GO:0008152(metabolic process)	GO:0016740(transferase activity);GO:0016757(transferase activity, transferring glycosyl groups);GO:0016758(transferase activity, transferring hexosyl groups)		51.5622	46.2479	0.896935	-0.156925			51.5622	40.8392	0.792038	-0.336358
BC053401	M300004809									87.9027	64.6879	0.735904	-0.442411			87.9027	64.7197	0.736266	-0.441702
Hgs	M300004771	ENSMUSG00000025793	NM_008244	15239	Hgs	HGF-regulated tyrosine kinase substrate [Source:MarkerSymbol;Acc:MGI:104681]	GO:0006810(transport);GO:0006886(intracellular protein transport);GO:0015031(protein transport)	GO:0008270(zinc ion binding);GO:0016301(kinase activity);GO:0046872(metal ion binding)	GO:0005737(cytoplasm);GO:0016020(membrane)	317.934	212.73	0.6691	-0.579706			317.934	146.675	0.461338	-1.1161		*
2310007F12Rik	M300004545									325.181	226.399	0.696226	-0.522371			325.181	173.259	0.532809	-0.90831
Peo1	M300004514	ENSMUSG00000025209	NM_153796	226153	Peo1	progressive external ophthalmoplegia 1 (human) [Source:MarkerSymbol;Acc:MGI:2137410]	GO:0006260(DNA replication);GO:0006268(DNA unwinding during replication)	GO:0000166(nucleotide binding);GO:0003678(DNA helicase activity);GO:0004386(helicase activity);GO:0005524(ATP binding);GO:0016787(hydrolase activity)	GO:0005739(mitochondrion)	82.5956	66.6385	0.806804	-0.30971			82.5956	70.4635	0.853114	-0.229189
Ms4a1	M300004265	ENSMUSG00000024673	NM_007641	12482	Ms4a1	membrane-spanning 4-domains, subfamily A, member 1 [Source:MarkerSymbol;Acc:MGI:88321]	GO:0006952(defense response);GO:0007165(signal transduction);GO:0042113(B cell activation)	GO:0004872(receptor activity)	GO:0005886(plasma membrane);GO:0016020(membrane);GO:0016021(integral to membrane)	5.83423	3.64227	0.624294	-0.679703			5.83423	2.13884	0.366602	-1.44771		*
Slc6a7	M300004236	ENSMUSG00000052026	NM_201353	240332	Slc6a7	solute carrier family 6 (neurotransmitter transporter, L-proline), member 7 [Source:MarkerSymbol;Acc:MGI:2147363]	GO:0006810(transport);GO:0006836(neurotransmitter transport);GO:0006865(amino acid transport)	GO:0005328(neurotransmitter:sodium symporter activity);GO:0015171(amino acid transporter activity);GO:0015293(symporter activity)	GO:0005887(integral to plasma membrane);GO:0016020(membrane);GO:0016021(integral to membrane)	5.17624	4.1988	0.811168	-0.301927			5.17624	1.52215	0.294064	-1.7658		*
Crem	M300004005									4.17424	1.89931	0.455008	-1.13604		*	4.17424	2.03145	0.486665	-1.039		*
-	M300003965									66.159	44.2765	0.669243	-0.579397			66.159	35.1672	0.531556	-0.911707
XP_912255.1	M300003726									25.8353	20.0082	0.774453	-0.368751			25.8353	22.43	0.868193	-0.203912
Usp8	M400001002	ENSMUSG00000027363	NM_019729	0	Usp8	ubiquitin specific peptidase 8 [Source:MarkerSymbol;Acc:MGI:1934029]	GO:0006265(DNA topological change);GO:0006511(ubiquitin-dependent protein catabolic process);GO:0006512(ubiquitin cycle);GO:0007265(Ras protein signal transduction)	GO:0003690(double-stranded DNA binding);GO:0004197(cysteine-type endopeptidase activity);GO:0004221(ubiquitin thiolesterase activity);GO:0004843(ubiquitin-specific protease activity);GO:0005515(protein binding);GO:0008233(peptidase activity);GO:0008234(cysteine-type peptidase activity);GO:0016787(hydrolase activity)	GO:0005622(intracellular)	59.3577	56.0435	0.944166	-0.0828874			59.3577	38.596	0.650227	-0.620984
Cpox	M300003479	ENSMUSG00000022742	NM_007757;XM_489571	12892	Cpox	coproporphyrinogen oxidase [Source:MarkerSymbol;Acc:MGI:104841]	GO:0006779(porphyrin biosynthetic process);GO:0006783(heme biosynthetic process)	GO:0004109(coproporphyrinogen oxidase activity);GO:0016491(oxidoreductase activity)	GO:0005739(mitochondrion)	26.0733	13.5574	0.519974	-0.943488			26.0733	71.7216	2.75077	1.45983	*
Dppa4	M300003437	ENSMUSG00000058550	NM_028610	433161	Dppa4	developmental pluripotency associated 4 [Source:MarkerSymbol;Acc:MGI:2157525]			GO:0005634(nucleus)	6.07635	2.57627	0.423983	-1.23792		*	6.07635	2.23905	0.368487	-1.44032		*
Angpt1	M300003197	ENSMUSG00000022309	NM_009640	0	Angpt1	angiopoietin 1 [Source:MarkerSymbol;Acc:MGI:108448]	GO:0001525(angiogenesis);GO:0007165(signal transduction);GO:0007169(transmembrane receptor protein tyrosine kinase signaling pathway);GO:0007275(multicellular organismal development);GO:0007492(endoderm development);GO:0030154(cell differentiation)	GO:0005102(receptor binding);GO:0005172(vascular endothelial growth factor receptor binding)	GO:0005615(extracellular space)	75.7378	115.204	1.52108	0.6051			75.7378	36.4171	0.480831	-1.0564		*
Amacr	M300003163	ENSMUSG00000022244	NM_008537	17117	Amacr	alpha-methylacyl-CoA racemase [Source:MarkerSymbol;Acc:MGI:1098273]	GO:0008152(metabolic process);GO:0008300(isoprenoid catabolic process)	GO:0008111(alpha-methylacyl-CoA racemase activity);GO:0016853(isomerase activity)	GO:0005739(mitochondrion);GO:0005777(peroxisome)	360.537	773.388	2.1451	1.10105	*		360.537	213.099	0.591062	-0.75862
9630046K23Rik	M300009122	ENSMUSG00000034064		224143	9630046K23Rik	RIKEN cDNA 9630046K23 gene [Source:MarkerSymbol;Acc:MGI:2444232]			GO:0005615(extracellular space);GO:0005783(endoplasmic reticulum)	353.913	265.473	0.750108	-0.414829			353.913	196.055	0.553965	-0.852132
Pqlc1	M300009086	ENSMUSG00000034006	NM_025861	0	Pqlc1	PQ loop repeat containing 1 [Source:MarkerSymbol;Acc:MGI:1914193]				79.54	67.759	0.851886	-0.231268			79.54	56.6181	0.71182	-0.490416
Znrf1	M300008828	ENSMUSG00000033545	NM_133206	170737	Znrf1	zinc and ring finger 1 [Source:MarkerSymbol;Acc:MGI:2177308]	GO:0006512(ubiquitin cycle);GO:0008150(biological_process)	GO:0003674(molecular_function);GO:0005515(protein binding);GO:0008270(zinc ion binding);GO:0016874(ligase activity);GO:0046872(metal ion binding)	GO:0005575(cellular_component);GO:0016020(membrane)	51.3405	35.092	0.683516	-0.548954			51.3405	38.6496	0.75281	-0.409643
Plcxd1	M300008781	ENSMUSG00000064247	NM_207279	403178	Plcxd1	phosphatidylinositol-specific phospholipase C, X domain containing 1 [Source:MarkerSymbol;Acc:MGI:2685422]	GO:0007242(intracellular signaling cascade)	GO:0004629(phospholipase C activity)		14.4641	9.0763	0.627504	-0.672303			14.4641	6.21381	0.429601	-1.21893		*
NM_029200.1	M300008515									10.1983	6.49036	0.636416	-0.651958			10.1983	4.48282	0.439565	-1.18585		*
Cyb5r4	M300008489	ENSMUSG00000032872;ENSMUSG00000050550		266690	Cyb5r4	cytochrome b5 reductase 4 [Source:MarkerSymbol;Acc:MGI:2386848]	GO:0006118(electron transport);GO:0042168(heme metabolic process)	GO:0004128(cytochrome-b5 reductase activity);GO:0016491(oxidoreductase activity);GO:0020037(heme binding);GO:0046914(transition metal ion binding)	GO:0005737(cytoplasm)	97.3666	69.9491	0.718409	-0.477122			97.3666	55.4483	0.56948	-0.812284
Clstn2	M300008261	ENSMUSG00000032452	NM_022319	64085	Clstn2	calsyntenin 2 [Source:MarkerSymbol;Acc:MGI:1929897]	GO:0007155(cell adhesion);GO:0007156(homophilic cell adhesion);GO:0009401(phosphoenolpyruvate-dependent sugar phosphotransferase system)	GO:0005351(sugar porter activity);GO:0005509(calcium ion binding);GO:0005515(protein binding)	GO:0005615(extracellular space);GO:0016020(membrane);GO:0016021(integral to membrane);GO:0045211(postsynaptic membrane)	30.4528	23.5928	0.774732	-0.36823			30.4528	15.7261	0.51641	-0.953413
Trip4	M300008233	ENSMUSG00000032386	NM_019797	0	Trip4	thyroid hormone receptor interactor 4 [Source:MarkerSymbol;Acc:MGI:1928469]	GO:0006350(transcription);GO:0006355(regulation of transcription, DNA-dependent);GO:0006366(transcription from RNA polymerase II promoter);GO:0045449(regulation of transcription)	GO:0003713(transcription coactivator activity);GO:0004872(receptor activity);GO:0008270(zinc ion binding);GO:0016922(ligand-dependent nuclear receptor binding);GO:0030528(transcription regulator activity);GO:0046872(metal ion binding)	GO:0005634(nucleus);GO:0005737(cytoplasm)	128.477	90.2412	0.702391	-0.509653			128.477	56.7891	0.442017	-1.17783		*
Kars	M300007993	ENSMUSG00000031948	NM_053092	631033	Kars	lysyl-tRNA synthetase [Source:MarkerSymbol;Acc:MGI:1934754]	GO:0006412(translation);GO:0006418(tRNA aminoacylation for protein translation);GO:0006422(aspartyl-tRNA aminoacylation);GO:0006430(lysyl-tRNA aminoacylation);GO:0008033(tRNA processing)	GO:0000049(tRNA binding);GO:0000166(nucleotide binding);GO:0003676(nucleic acid binding);GO:0004812(aminoacyl-tRNA ligase activity);GO:0004815(aspartate-tRNA ligase activity);GO:0004824(lysine-tRNA ligase activity);GO:0005515(protein binding);GO:0005524(ATP binding);GO:0016874(ligase activity)	GO:0005634(nucleus);GO:0005737(cytoplasm);GO:0005739(mitochondrion)	1313.7	828.1	0.630358	-0.665758			1313.7	812.08	0.618163	-0.69394
Dpep2	M300007968	ENSMUSG00000053687	NM_176913	319446	Dpep2	dipeptidase 2 [Source:MarkerSymbol;Acc:MGI:2442042]	GO:0006508(proteolysis)	GO:0004237(membrane dipeptidase activity);GO:0008233(peptidase activity);GO:0008237(metallopeptidase activity);GO:0008238(exopeptidase activity);GO:0008239(dipeptidyl-peptidase activity);GO:0008270(zinc ion binding);GO:0016787(hydrolase activity);GO:0016805(dipeptidase activity);GO:0046872(metal ion binding);GO:0048503(GPI anchor binding)	GO:0016020(membrane)	18.1647	16.8634	0.92836	-0.107244			18.1647	6.20053	0.34135	-1.55067		*
Cd209d	M300007734	ENSMUSG00000031495	NM_130904	0	Cd209d	CD209d antigen [Source:MarkerSymbol;Acc:MGI:2157947]	GO:0006897(endocytosis);GO:0007157(heterophilic cell adhesion)	GO:0004872(receptor activity);GO:0005509(calcium ion binding);GO:0005529(sugar binding);GO:0005537(mannose binding);GO:0042803(protein homodimerization activity);GO:0046872(metal ion binding)	GO:0016020(membrane);GO:0016021(integral to membrane)	6.78226	4.58926	0.676656	-0.563505			6.78226	5.60882	0.826984	-0.274068
Atp2b3	M300007691	ENSMUSG00000031376	NM_177236	0	Atp2b3	ATPase, Ca++ transporting, plasma membrane 3 [Source:MarkerSymbol;Acc:MGI:1347353]	GO:0006810(transport);GO:0006811(ion transport);GO:0006812(cation transport);GO:0006816(calcium ion transport);GO:0008152(metabolic process)	GO:0000166(nucleotide binding);GO:0000287(magnesium ion binding);GO:0005388(calcium-transporting ATPase activity);GO:0005509(calcium ion binding);GO:0005516(calmodulin binding);GO:0005524(ATP binding);GO:0015662(ATPase activity, coupled to transmembrane movement of ions, phosphorylative mechanism);GO:0016787(hydrolase activity);GO:0016820(hydrolase activity, acting on acid anhydrides, catalyzing …	GO:0016020(membrane);GO:0016021(integral to membrane)	3.77281						3.77281
Prss8	M300007438	ENSMUSG00000030800	NM_133351	0	Prss8	protease, serine, 8 (prostasin) [Source:MarkerSymbol;Acc:MGI:1923810]	GO:0006508(proteolysis)	GO:0004252(serine-type endopeptidase activity);GO:0004263(chymotrypsin activity);GO:0008233(peptidase activity);GO:0016787(hydrolase activity)	GO:0005615(extracellular space);GO:0016020(membrane);GO:0016021(integral to membrane)	3.57623	1.95429	0.546467	-0.871795			3.57623	1.6617	0.464652	-1.10578		*
-	M300007389									547.895	437.335	0.79821	-0.32516			547.895	263.504	0.480938	-1.05608		*
-	M300007106									140.445	121.91	0.868025	-0.204191			140.445	110.415	0.786178	-0.347071
Bcl2l14	M300007068	ENSMUSG00000030200	NM_025778	66813	Bcl2l14	Bcl2-like 14 (apoptosis facilitator) [Source:MarkerSymbol;Acc:MGI:1914063]				4.18673	1.8967	0.453028	-1.14233		*	4.18673	0.52959	0.126493	-2.98287		**
Rbm28	M300006826	ENSMUSG00000029701	NM_133925	68272	Rbm28	RNA binding motif protein 28 [Source:MarkerSymbol;Acc:MGI:2655711]		GO:0000166(nucleotide binding);GO:0003676(nucleic acid binding);GO:0003723(RNA binding)	GO:0005634(nucleus)	102.487	63.0166	0.614872	-0.701641			102.487	115.182	1.12387	0.168474
Cdk8	M300006792	ENSMUSG00000029635	NM_153599;NM_181570;XM_484371	0	Cdk8	cyclin-dependent kinase 8 [Source:MarkerSymbol;Acc:MGI:1196224]	GO:0006350(transcription);GO:0006355(regulation of transcription, DNA-dependent);GO:0006468(protein amino acid phosphorylation);GO:0007049(cell cycle);GO:0051301(cell division)	GO:0000166(nucleotide binding);GO:0004672(protein kinase activity);GO:0004674(protein serine/threonine kinase activity);GO:0004693(cyclin-dependent protein kinase activity);GO:0005524(ATP binding);GO:0016301(kinase activity);GO:0016740(transferase activity)	GO:0000119(mediator complex);GO:0005634(nucleus)	270.709	142.763	0.527367	-0.92312			270.709	219.111	0.809398	-0.305079
Lnx1	M300006562	ENSMUSG00000029228	NM_010727	16924	Lnx1	ligand of numb-protein X 1 [Source:MarkerSymbol;Acc:MGI:1278335]	GO:0006511(ubiquitin-dependent protein catabolic process);GO:0006512(ubiquitin cycle);GO:0007242(intracellular signaling cascade);GO:0042787(protein ubiquitination during ubiquitin-dependent protein catabolic process);GO:0051260(protein homooligomerization)	GO:0004842(ubiquitin-protein ligase activity);GO:0005515(protein binding);GO:0008270(zinc ion binding);GO:0016874(ligase activity);GO:0030165(PDZ domain binding);GO:0046872(metal ion binding)	GO:0005615(extracellular space);GO:0005737(cytoplasm)	2.78881	2.06611	0.740859	-0.432729			2.78881	1.00459	0.360223	-1.47304		*
9430057O19Rik	M300006523	ENSMUSG00000029165		231093	9430057O19Rik	RIKEN cDNA 9430057O19 gene [Source:MarkerSymbol;Acc:MGI:2441745]	GO:0006508(proteolysis)	GO:0004180(carboxypeptidase activity);GO:0004182(carboxypeptidase A activity)		26.4943	25.8901	0.977195	-0.033281			26.4943	20.9786	0.791817	-0.336761
Zfp31	M300006305	ENSMUSG00000061894	NM_177758	0	Zfp31	zinc finger protein 31 [Source:MarkerSymbol;Acc:MGI:2679268]	GO:0006355(regulation of transcription, DNA-dependent)	GO:0003677(DNA binding);GO:0003700(transcription factor activity);GO:0008270(zinc ion binding);GO:0046872(metal ion binding)	GO:0005622(intracellular);GO:0005634(nucleus)	38.8652	27.9107	0.718143	-0.477658			38.8652	20.6969	0.53253	-0.909064
Ece1	M300006272	ENSMUSG00000057530	NM_199307	0	Ece1	endothelin converting enzyme 1 [Source:MarkerSymbol;Acc:MGI:1101357]	GO:0006508(proteolysis);GO:0016486(peptide hormone processing);GO:0060037(pharyngeal system development)	GO:0004245(neprilysin activity);GO:0008233(peptidase activity);GO:0008237(metallopeptidase activity);GO:0008270(zinc ion binding);GO:0016511(endothelin-converting enzyme activity);GO:0016512(endothelin-converting enzyme 1 activity);GO:0016787(hydrolase activity);GO:0046872(metal ion binding)	GO:0005794(Golgi apparatus);GO:0009986(cell surface);GO:0016020(membrane);GO:0016021(integral to membrane)	96.0665	90.9775	0.947027	-0.0785231			96.0665	17.636	0.183581	-2.44551		**
Mpdz	M300006078	ENSMUSG00000028402	NM_010820	0	Mpdz	multiple PDZ domain protein [Source:MarkerSymbol;Acc:MGI:1343489]	GO:0007155(cell adhesion)	GO:0005515(protein binding)	GO:0005923(tight junction);GO:0016020(membrane);GO:0019717(synaptosome);GO:0045202(synapse)	78.0205	74.1501	0.950392	-0.0734053			78.0205	58.9621	0.755726	-0.404065
Pak7	M300012441	ENSMUSG00000039913	NM_172858	0	Pak7	p21 (CDKN1A)-activated kinase 7 [Source:MarkerSymbol;Acc:MGI:1920334]	GO:0006468(protein amino acid phosphorylation);GO:0006916(anti-apoptosis)	GO:0000166(nucleotide binding);GO:0004672(protein kinase activity);GO:0004674(protein serine/threonine kinase activity);GO:0004713(protein-tyrosine kinase activity);GO:0005524(ATP binding);GO:0016301(kinase activity);GO:0016740(transferase activity)	GO:0005739(mitochondrion)	10.25	6.32429	0.617005	-0.696646			10.25	4.22152	0.411856	-1.27979		*
Ccdc27	M300012206	ENSMUSG00000039492	XM_355541	381580	Ccdc27	coiled-coil domain containing 27 [Source:MarkerSymbol;Acc:MGI:2685881]	GO:0006412(translation)	GO:0003735(structural constituent of ribosome)	GO:0005622(intracellular);GO:0005840(ribosome)	6.71291	5.70803	0.850307	-0.233945			6.71291	3.00248	0.44727	-1.16078		*
NP_035507.1	M300012154									25.3301	13.393	0.528739	-0.919372			25.3301	8.71383	0.344011	-1.53947		*
Cpa4	M300011925	ENSMUSG00000039070	NM_027926	71791	Cpa4	carboxypeptidase A4 [Source:MarkerSymbol;Acc:MGI:1919041]	GO:0006508(proteolysis)	GO:0004180(carboxypeptidase activity);GO:0004182(carboxypeptidase A activity);GO:0008233(peptidase activity);GO:0008237(metallopeptidase activity);GO:0008270(zinc ion binding);GO:0016787(hydrolase activity);GO:0046872(metal ion binding)	GO:0005615(extracellular space)	7.56875	5.65186	0.746737	-0.421329			7.56875	2.17101	0.286839	-1.80169		*
2610034B18Rik	M300011900	ENSMUSG00000039043	NM_027420	70420	2610034B18Rik	RIKEN cDNA 2610034B18 gene [Source:MarkerSymbol;Acc:MGI:1917670]				254.606	155.941	0.612481	-0.707263			254.606	76.5688	0.300735	-1.73344		*
Capn8	M300011653	ENSMUSG00000038599	NM_130890	170725	Capn8	calpain 8 [Source:MarkerSymbol;Acc:MGI:2181366]	GO:0006508(proteolysis)	GO:0004197(cysteine-type endopeptidase activity);GO:0004198(calpain activity);GO:0005509(calcium ion binding);GO:0008233(peptidase activity);GO:0008234(cysteine-type peptidase activity);GO:0016787(hydrolase activity)	GO:0005622(intracellular)	7.99492	5.26163	0.658122	-0.603573			7.99492	3.78637	0.473597	-1.07827		*
Twsg1	M200002883	ENSMUSG00000024098	NM_023053	65960	Twsg1	twisted gastrulation homolog 1 (Drosophila) [Source:MarkerSymbol;Acc:MGI:2137520]	GO:0001503(ossification);GO:0001707(mesoderm formation);GO:0007275(multicellular organismal development);GO:0009790(embryonic development);GO:0009888(tissue development);GO:0030097(hemopoiesis);GO:0030154(cell differentiation);GO:0030509(BMP signaling pathway);GO:0030513(positive regulation of BMP signaling pathway);GO:0030514(negative regulation of BMP signaling pathway);GO:0030900(forebrain dev…	GO:0005515(protein binding)	GO:0005615(extracellular space)	287.941	219.777	0.763272	-0.389731			287.941	112.397	0.390346	-1.35717		*
XP_994503.1	M300011367									19.5877	56.3274	2.87565	1.52389	*		19.5877	8.29756	0.423611	-1.23919		*
Hsd3b2	M300011334	ENSMUSG00000063730	NM_153193	0	Hsd3b2	hydroxy-delta-5-steroid dehydrogenase, 3 beta- and steroid delta-isomerase 2 [Source:MarkerSymbol;Acc:MGI:96234]	GO:0006694(steroid biosynthetic process);GO:0006700(C21(steroid hormone biosynthetic process)	GO:0003824(catalytic activity);GO:0003854(3(beta-hydroxy-delta5(steroid dehydrogenase activity);GO:0004769(steroid delta-isomerase activity);GO:0016491(oxidoreductase activity);GO:0016853(isomerase activity)	GO:0005739(mitochondrion);GO:0005783(endoplasmic reticulum);GO:0016020(membrane);GO:0016021(integral to membrane)	4.76833	2.57701	0.540442	-0.887788			4.76833	1.67498	0.351272	-1.50934		*
Prosapip1	M300011079	ENSMUSG00000037703	NM_197945	0	Prosapip1	ProSAPiP1 protein [Source:MarkerSymbol;Acc:MGI:2656976]		GO:0005198(structural molecule activity)	GO:0005737(cytoplasm);GO:0016020(membrane)	18.2248	12.5039	0.686094	-0.543522			18.2248	10.6758	0.585787	-0.771551
Kcnmb2	M300011026	ENSMUSG00000037610	NM_028231	0	Kcnmb2	potassium large conductance calcium-activated channel, subfamily M, beta member 2 [Source:MarkerSymbol;Acc:MGI:1919663]	GO:0001508(regulation of action potential);GO:0005513(detection of calcium ion);GO:0006810(transport);GO:0006811(ion transport);GO:0006813(potassium ion transport);GO:0019228(generation of action potential)	GO:0005216(ion channel activity);GO:0015269(calcium-activated potassium channel activity)	GO:0008076(voltage-gated potassium channel complex);GO:0016020(membrane);GO:0016021(integral to membrane)	3.19023	3.30294	1.03533	0.050092			3.19023	0.805236	0.252407	-1.98618		*
Nodal	M300010786	ENSMUSG00000037171	NM_013611	18119	Nodal	nodal [Source:MarkerSymbol;Acc:MGI:97359]				17.313	13.4454	0.776607	-0.364744			17.313	12.166	0.702708	-0.509002
H2-M10.6	M300010753	ENSMUSG00000037130	NM_201611	399549	H2-M10.6	histocompatibility 2, M region locus 10.6 [Source:MarkerSymbol;Acc:MGI:2687364]	GO:0019882(antigen processing and presentation)		GO:0016020(membrane);GO:0016021(integral to membrane);GO:0042612(MHC class I protein complex)	5.72154	4.25304	0.743339	-0.427907			5.72154	3.96847	0.693603	-0.527818
Cc2d1a	M300010496	ENSMUSG00000036686		212139	Cc2d1a	coiled-coil and C2 domain containing 1A [Source:MarkerSymbol;Acc:MGI:2384831]	GO:0006350(transcription);GO:0006355(regulation of transcription, DNA-dependent);GO:0043123(positive regulation of I-kappaB kinase/NF-kappaB cascade)	GO:0003677(DNA binding);GO:0004871(signal transducer activity)	GO:0005634(nucleus)	52.6454	40.0728	0.761183	-0.393685			52.6454	25.5374	0.485083	-1.0437		*
Mag	M300010471	ENSMUSG00000036634	NM_010758	17136	Mag	myelin-associated glycoprotein [Source:MarkerSymbol;Acc:MGI:96912]	GO:0007155(cell adhesion)	GO:0005515(protein binding);GO:0005529(sugar binding)	GO:0005615(extracellular space);GO:0016020(membrane);GO:0016021(integral to membrane)	27.698	23.4131	0.845297	-0.24247			27.698	19.4181	0.701063	-0.512384
1810041L15Rik	M300010247	ENSMUSG00000062760	XM_128169	0	1810041L15Rik	RIKEN cDNA 1810041L15 gene [Source:MarkerSymbol;Acc:MGI:1919551]				11.0863	8.06601	0.727569	-0.458845			11.0863	5.82253	0.525203	-0.929054
Galt	M300010227	ENSMUSG00000036073	NM_016658	0	Galt	galactose-1-phosphate uridyl transferase [Source:MarkerSymbol;Acc:MGI:95638]	GO:0005975(carbohydrate metabolic process);GO:0006012(galactose metabolic process)	GO:0005506(iron ion binding);GO:0008108(UDP-glucose:hexose-1(phosphate uridylyltransferase activity);GO:0008270(zinc ion binding);GO:0016740(transferase activity);GO:0016779(nucleotidyltransferase activity);GO:0046872(metal ion binding)		61.527	59.5803	0.96836	-0.0463847			61.527	38.6757	0.628597	-0.669793
Tsen34	M300010003	ENSMUSG00000035585	NM_024168	0	Tsen34	tRNA splicing endonuclease 34 homolog (SEN34, S. cerevisiae) [Source:MarkerSymbol;Acc:MGI:1913328]				1106.04	990.741	0.895759	-0.158818			1106.04	613.164	0.55438	-0.851053
2410039E07Rik	M300009979									56.2509	41.1392	0.731352	-0.451362			56.2509	51.2393	0.910907	-0.134625
Wnk4	M300009701									27.609	26.3897	0.955836	-0.0651644			27.609	25.8216	0.935258	-0.0965641
Nek11	M300009666	ENSMUSG00000035032	NM_172461	208583	Nek11	NIMA (never in mitosis gene a)-related expressed kinase 11 [Source:MarkerSymbol;Acc:MGI:2442276]	GO:0006468(protein amino acid phosphorylation);GO:0007049(cell cycle);GO:0007243(protein kinase cascade);GO:0031573(intra-S DNA damage checkpoint)	GO:0000166(nucleotide binding);GO:0000287(magnesium ion binding);GO:0004672(protein kinase activity);GO:0004674(protein serine/threonine kinase activity);GO:0004713(protein-tyrosine kinase activity);GO:0005524(ATP binding);GO:0016301(kinase activity);GO:0016740(transferase activity);GO:0030145(manganese ion binding);GO:0046872(metal ion binding)	GO:0005634(nucleus);GO:0005730(nucleolus)	3.79467	3.52303	0.928414	-0.10716			3.79467	1.76802	0.465921	-1.10184		*
Exph5	M300009430	ENSMUSG00000034584		320051	Exph5	exophilin 5 [Source:MarkerSymbol;Acc:MGI:2443248]	GO:0006886(intracellular protein transport);GO:0008150(biological_process)	GO:0005515(protein binding);GO:0008270(zinc ion binding);GO:0017137(Rab GTPase binding)	GO:0005575(cellular_component)	4.88751	2.01187	0.411636	-1.28056		*	4.88751	0.898274	0.18379	-2.44387		**
Edil3	M300009382	ENSMUSG00000034488	NM_010103	13612	Edil3	EGF-like repeats and discoidin I-like domains 3 [Source:MarkerSymbol;Acc:MGI:1329025]	GO:0007155(cell adhesion);GO:0007275(multicellular organismal development)	GO:0005509(calcium ion binding);GO:0005515(protein binding)	GO:0005615(extracellular space)	16.541	26.9554	1.62961	0.70453			16.541	16.2952	0.985143	-0.0215942
BC017133	M300016816	ENSMUSG00000045896	NM_146169	232164	BC017133	cDNA sequence BC017133 [Source:MarkerSymbol;Acc:MGI:2386865]				51.9989	34.1796	0.657314	-0.605345			51.9989	32.7517	0.629854	-0.666912
Angptl6	M400002186	ENSMUSG00000038742	NM_145154	70726	Angptl6	angiopoietin-like 6 [Source:MarkerSymbol;Acc:MGI:1917976]	GO:0001525(angiogenesis);GO:0007165(signal transduction);GO:0007275(multicellular organismal development);GO:0030154(cell differentiation)	GO:0005102(receptor binding)	GO:0005615(extracellular space);GO:0030141(secretory granule)	13.8793	12.2714	0.884152	-0.177633			13.8793	28.627	2.06257	1.04444	*
Rbm15b	M300016326	ENSMUSG00000045365	NM_175402	0	Rbm15b	RNA binding motif protein 15B [Source:MarkerSymbol;Acc:MGI:1923598]				82.3539	59.9122	0.727497	-0.458987			82.3539	38.7522	0.470557	-1.08756		*
Lhfpl2	M300016280	ENSMUSG00000045312	NM_172589	218454	Lhfpl2	lipoma HMGIC fusion partner-like 2 [Source:MarkerSymbol;Acc:MGI:2145236]	GO:0008152(metabolic process)	GO:0016740(transferase activity)	GO:0016020(membrane);GO:0016021(integral to membrane)	130.74	150.557	1.15158	0.203609			130.74	181.255	1.38638	0.471323
Olfr1030	M300015907	ENSMUSG00000044923	NM_146588	258581	Olfr1030	olfactory receptor 1030 [Source:MarkerSymbol;Acc:MGI:3030864]	GO:0007165(signal transduction);GO:0007186(G-protein coupled receptor protein signaling pathway);GO:0007608(sensory perception of smell);GO:0050896(response to stimulus)	GO:0001584(rhodopsin-like receptor activity);GO:0004871(signal transducer activity);GO:0004872(receptor activity);GO:0004930(G-protein coupled receptor activity);GO:0004984(olfactory receptor activity)	GO:0016020(membrane);GO:0016021(integral to membrane)	5.10875	3.52303	0.689607	-0.536154			5.10875	1.39934	0.27391	-1.86823		*
Lemd2	M300015844									179.346	169.454	0.944843	-0.0818531			179.346	97.2629	0.542319	-0.882786
Zfp407	M300015380	ENSMUSG00000044356	XM_140518	0	Zfp407	zinc finger protein 407 [Source:MarkerSymbol;Acc:MGI:2685179]	GO:0008150(biological_process)	GO:0003674(molecular_function);GO:0003676(nucleic acid binding);GO:0008270(zinc ion binding);GO:0046872(metal ion binding)	GO:0005575(cellular_component);GO:0005622(intracellular)	3.59585	2.23864	0.622563	-0.683708			3.59585	0.856792	0.238273	-2.06932		**
Uhmk1	M300015333	ENSMUSG00000044306		0	Uhmk1	U2AF homology motif (UHM) kinase 1 [Source:MarkerSymbol;Acc:MGI:1341908]				64.5548	44.953	0.696353	-0.522109			64.5548	35.9963	0.557608	-0.842677
Slc36a4	M300014940	ENSMUSG00000043885	NM_172289	234967	Slc36a4	solute carrier family 36 (proton/amino acid symporter), member 4 [Source:MarkerSymbol;Acc:MGI:2442595]	GO:0006865(amino acid transport)	GO:0005279(amino acid-polyamine transporter activity)	GO:0016020(membrane)	13.1342	11.0946	0.844704	-0.243482			13.1342	3.56655	0.271546	-1.88073		*
Mrpl23	M300014875	ENSMUSG00000037772;ENSMUSG00000075279	NM_011288	100046620	Mrpl23	mitochondrial ribosomal protein L23 [Source:MarkerSymbol;Acc:MGI:1196612]	GO:0006412(translation);GO:0042254(ribosome biogenesis and assembly)	GO:0000166(nucleotide binding);GO:0003723(RNA binding);GO:0003735(structural constituent of ribosome)	GO:0005739(mitochondrion);GO:0005762(mitochondrial large ribosomal subunit);GO:0030529(ribonucleoprotein complex)	643.538	919.844	1.42935	0.515364			643.538	382.246	0.593975	-0.751525
D430033N04Rik	M300014413									29.5415	18.8866	0.639324	-0.645382			29.5415	20.5672	0.696213	-0.522399
4930486G11Rik	M300014364	ENSMUSG00000043289	NM_175213	0	4930486G11Rik	RIKEN cDNA 4930486G11 gene [Source:MarkerSymbol;Acc:MGI:1922283]	GO:0008150(biological_process)	GO:0003674(molecular_function)	GO:0005575(cellular_component)	3.56183	2.85683	0.802068	-0.318203			3.56183	0.78371	0.22003	-2.18423		**
NP311_MOUSE	M300013932									24.5883	137.609	5.59653	2.48453	**		24.5883	3.52614	0.143407	-2.80181		**
XP_993588.1	M300013862									7.30989	3.97656	0.543998	-0.878328			7.30989	3.95412	0.540928	-0.886493
Gnl3	M300013645	ENSMUSG00000042354	NM_153547;NM_178846	30877	Gnl3	guanine nucleotide binding protein-like 3 (nucleolar) [Source:MarkerSymbol;Acc:MGI:1353651]	GO:0000074(regulation of progression through cell cycle);GO:0008150(biological_process);GO:0042127(regulation of cell proliferation)	GO:0000166(nucleotide binding);GO:0003674(molecular_function);GO:0005515(protein binding);GO:0005525(GTP binding)	GO:0005622(intracellular);GO:0005634(nucleus);GO:0005730(nucleolus)	581.307	338.429	0.582187	-0.780446			581.307	849.603	1.46154	0.547488
Nxt2	M300013607	ENSMUSG00000042271	NM_172782	0	Nxt2	nuclear transport factor 2-like export factor 2 [Source:MarkerSymbol;Acc:MGI:2147914]	GO:0006606(protein import into nucleus);GO:0006810(transport)	GO:0005515(protein binding);GO:0008565(protein transporter activity)	GO:0005622(intracellular);GO:0005634(nucleus)	113.639	64.1181	0.564225	-0.825656			113.639	47.0638	0.414152	-1.27177		*
Plekha6	M300013347	ENSMUSG00000041757	NM_182930	0	Plekha6	pleckstrin homology domain containing, family A member 6 [Source:MarkerSymbol;Acc:MGI:2388662]				31.819	26.2741	0.825737	-0.276246			31.819	30.9521	0.972756	-0.0398506
Mpped1	M300013313	ENSMUSG00000041708	NM_172610	223726	Mpped1	metallophosphoesterase domain containing 1 [Source:MarkerSymbol;Acc:MGI:106316]		GO:0016787(hydrolase activity)		3.48823	2.18202	0.625537	-0.676833			3.48823	2.88288	0.826459	-0.274985
Prkd2	M300013046	ENSMUSG00000041187	NM_178900	101540	Prkd2	protein kinase D2 [Source:MarkerSymbol;Acc:MGI:2141917]	GO:0006468(protein amino acid phosphorylation);GO:0007242(intracellular signaling cascade)	GO:0000166(nucleotide binding);GO:0004672(protein kinase activity);GO:0004674(protein serine/threonine kinase activity);GO:0005524(ATP binding);GO:0008270(zinc ion binding);GO:0016301(kinase activity);GO:0016740(transferase activity);GO:0019992(diacylglycerol binding);GO:0046872(metal ion binding)		52.6341	37.1585	0.705978	-0.502305			52.6341	28.4261	0.54007	-0.888783
AB182283	M300013012	ENSMUSG00000041073	XM_109794	192950	AB182283	cDNA sequence AB182283 [Source:MarkerSymbol;Acc:MGI:3603030]	GO:0006810(transport);GO:0015031(protein transport)		GO:0005634(nucleus)	21.7609	18.2687	0.839518	-0.252367			21.7609	10.3077	0.473679	-1.07802		*
Slc26a7	M300012731	ENSMUSG00000040569	NM_145947	208890	Slc26a7	solute carrier family 26, member 7 [Source:MarkerSymbol;Acc:MGI:2384791]	GO:0006810(transport);GO:0006820(anion transport);GO:0006821(chloride transport)	GO:0005215(transporter activity);GO:0005253(anion channel activity);GO:0005254(chloride channel activity)	GO:0016021(integral to membrane)	3.98184	2.23841	0.562155	-0.83096			3.98184	0.736122	0.184869	-2.43542		**
Zfp609	M300012707	ENSMUSG00000040524	NM_172536	214812	Zfp609	zinc finger protein 609 [Source:MarkerSymbol;Acc:MGI:2674092]		GO:0003676(nucleic acid binding);GO:0008270(zinc ion binding);GO:0046872(metal ion binding)	GO:0005622(intracellular)	42.2968	38.451	0.909076	-0.137526			42.2968	29.9734	0.708645	-0.496865
Ccdc32	M300012468	ENSMUSG00000039983	NM_199310	269336	Ccdc32	coiled-coil domain containing 32 [Source:MarkerSymbol;Acc:MGI:2685477]				120.413	131.166	1.0893	0.123405			120.413	106.448	0.884023	-0.177844
Gucy1a2	M400002526	ENSMUSG00000041624	XM_150145	0	Gucy1a2	guanylate cyclase 1, soluble, alpha 2 [Source:MarkerSymbol;Acc:MGI:2660877]	GO:0006182(cGMP biosynthetic process);GO:0007242(intracellular signaling cascade)	GO:0004383(guanylate cyclase activity);GO:0020037(heme binding)		15.7381	14.7302	0.935959	-0.095483			15.7381	8.23776	0.523427	-0.933939
Mmp14	M400000023	ENSMUSG00000000957		17387	Mmp14	matrix metallopeptidase 14 (membrane-inserted) [Source:MarkerSymbol;Acc:MGI:101900]	GO:0000270(peptidoglycan metabolic process);GO:0006508(proteolysis);GO:0016477(cell migration);GO:0030324(lung development);GO:0030574(collagen catabolic process);GO:0031638(zymogen activation);GO:0048754(branching morphogenesis of a tube)	GO:0004222(metalloendopeptidase activity);GO:0005509(calcium ion binding);GO:0005515(protein binding);GO:0008233(peptidase activity);GO:0008237(metallopeptidase activity);GO:0008270(zinc ion binding);GO:0016787(hydrolase activity);GO:0046872(metal ion binding)	GO:0005578(proteinaceous extracellular matrix);GO:0005615(extracellular space);GO:0016020(membrane);GO:0016021(integral to membrane)	274.284	268.336	0.978312	-0.0316338			274.284	70.2442	0.2561	-1.96522		*
Ins2	M400000009	ENSMUSG00000035804;ENSMUSG00000000215	NM_008387	0	Ins2	insulin II [Source:MarkerSymbol;Acc:MGI:96573]	GO:0000187(activation of MAPK activity);GO:0005975(carbohydrate metabolic process);GO:0006006(glucose metabolic process);GO:0006983(ER overload response);GO:0007257(activation of JNK activity);GO:0008286(insulin receptor signaling pathway);GO:0015758(glucose transport);GO:0016042(lipid catabolic process);GO:0042325(regulation of phosphorylation);GO:0042981(regulation of apoptosis)	GO:0005179(hormone activity)	GO:0005576(extracellular region);GO:0005615(extracellular space);GO:0005634(nucleus);GO:0005732(small nucleolar ribonucleoprotein complex);GO:0030141(secretory granule)	32.4937	106.83	3.28771	1.71708	*		32.4937	14.2293	0.437909	-1.1913		*
5830483C08Rik	M300021884	ENSMUSG00000051235	NM_177331	209334	5830483C08Rik	RIKEN cDNA 5830483C08 gene [Source:MarkerSymbol;Acc:MGI:2443149]	GO:0006281(DNA repair)	GO:0003677(DNA binding);GO:0004518(nuclease activity);GO:0004527(exonuclease activity)		118.676	36.6055	0.30845	-1.69689		*	118.676	43.8429	0.369435	-1.43661		*
Olfr655	M300021839	ENSMUSG00000051182		258817	Olfr655	olfactory receptor 655 [Source:MarkerSymbol;Acc:MGI:3030489]	GO:0007165(signal transduction);GO:0007186(G-protein coupled receptor protein signaling pathway);GO:0007608(sensory perception of smell);GO:0050896(response to stimulus)	GO:0004871(signal transducer activity);GO:0004872(receptor activity);GO:0004930(G-protein coupled receptor activity);GO:0004984(olfactory receptor activity)	GO:0016020(membrane);GO:0016021(integral to membrane)	4.71245	3.69674	0.784463	-0.350223			4.71245	0.589391	0.125071	-2.99918		**
2310061I04Rik	M300021380	ENSMUSG00000050705	XM_128627	69662	2310061I04Rik	RIKEN cDNA 2310061I04 gene [Source:MarkerSymbol;Acc:MGI:1916912]				260.1	154.742	0.594932	-0.749203			260.1	127.533	0.490323	-1.0282		*
6530421E24Rik	M300021311									4.30688	2.4004	0.557342	-0.843366			4.30688	0.737191	0.171166	-2.54653		**
Tmem10	M300020834									5.23818	3.02312	0.577133	-0.793025			5.23818	2.03756	0.388983	-1.36222		*
Lat2	M400002434	ENSMUSG00000040751	NM_022964	56743	Lat2	linker for activation of T cells family, member 2 [Source:MarkerSymbol;Acc:MGI:1926479]	GO:0006955(immune response);GO:0007242(intracellular signaling cascade);GO:0019722(calcium-mediated signaling);GO:0042113(B cell activation);GO:0043303(mast cell degranulation)	GO:0005515(protein binding);GO:0042169(SH2 domain binding)	GO:0005615(extracellular space);GO:0016020(membrane);GO:0016021(integral to membrane);GO:0045121(lipid raft)	11.3979	3.74957	0.328971	-1.60397		*	11.3979	9.98657	0.876179	-0.190703
Olfr1403	M300020347	ENSMUSG00000049605	NM_146651	258645	Olfr1403	olfactory receptor 1403 [Source:MarkerSymbol;Acc:MGI:3031237]	GO:0007165(signal transduction);GO:0007186(G-protein coupled receptor protein signaling pathway);GO:0007608(sensory perception of smell);GO:0050896(response to stimulus)	GO:0004871(signal transducer activity);GO:0004872(receptor activity);GO:0004930(G-protein coupled receptor activity);GO:0004984(olfactory receptor activity)	GO:0016020(membrane);GO:0016021(integral to membrane)	14.3957	11.8186	0.820978	-0.284584			14.3957	8.4847	0.589391	-0.762702
Tmie	M300020295	ENSMUSG00000049555	NM_146260	20776	Tmie	transmembrane inner ear [Source:MarkerSymbol;Acc:MGI:2159400]	GO:0007605(sensory perception of sound);GO:0042472(inner ear morphogenesis)		GO:0016020(membrane);GO:0016021(integral to membrane)	3.3877	2.52373	0.744968	-0.424749			3.3877	0.78371	0.23134	-2.11191		**
Olfr368	M300019787	ENSMUSG00000049018	NM_146374	258371	Olfr368	olfactory receptor 368 [Source:MarkerSymbol;Acc:MGI:3030202]	GO:0007165(signal transduction);GO:0007186(G-protein coupled receptor protein signaling pathway);GO:0007608(sensory perception of smell);GO:0050896(response to stimulus)	GO:0004871(signal transducer activity);GO:0004872(receptor activity);GO:0004930(G-protein coupled receptor activity);GO:0004984(olfactory receptor activity)	GO:0016020(membrane);GO:0016021(integral to membrane)	3.48408	2.29073	0.657484	-0.604972			3.48408	1.23825	0.355403	-1.49247		*
C1galt1c1	M300019743	ENSMUSG00000048970	NM_021550	59048	C1galt1c1	C1GALT1-specific chaperone 1 [Source:MarkerSymbol;Acc:MGI:1913493]		GO:0016740(transferase activity);GO:0016757(transferase activity, transferring glycosyl groups)	GO:0016021(integral to membrane)	204.821	316.803	1.54673	0.62922			204.821	86.5046	0.422341	-1.24352		*
Zdhhc22	M300019279	ENSMUSG00000048483		0	Zdhhc22	zinc finger, DHHC-type containing 22 [Source:MarkerSymbol;Acc:MGI:2685108]				4.61933	3.13206	0.678034	-0.560571			4.61933	3.94134	0.853228	-0.228997
Pld5	M300019233	ENSMUSG00000055214		0	Pld5	phospholipase D family, member 5 [Source:MarkerSymbol;Acc:MGI:2442056]	GO:0008152(metabolic process)	GO:0003824(catalytic activity)	GO:0016020(membrane)	3.71693	2.35047	0.632368	-0.661164			3.71693	0.950898	0.255829	-1.96675		*
-	M300018753									176.614	87.776	0.496993	-1.0087		*	176.614	111.29	0.630134	-0.666269
Parc	M400002355									54.8274	45.444	0.828856	-0.270807			54.8274	36.6114	0.667758	-0.582603
C230078M08Rik	M300018282	ENSMUSG00000047439	NM_176995	0	C230078M08Rik	RIKEN cDNA C230078M08 gene [Source:MarkerSymbol;Acc:MGI:2442659]				16.0059	8.23401	0.514435	-0.958939			16.0059	3.61811	0.226048	-2.1453		**
Defb9	M300018235	ENSMUSG00000047390	NM_139219	246079	Defb9	defensin beta 9 [Source:MarkerSymbol;Acc:MGI:2179198]	GO:0006952(defense response);GO:0042742(defense response to bacterium)		GO:0005576(extracellular region);GO:0005615(extracellular space)	2.50297	2.01187	0.803796	-0.315099			2.50297	0.944792	0.377469	-1.40557		*
Olfr1212	M300017746	ENSMUSG00000048226	NM_207140	0	Olfr1212	olfactory receptor 1212 [Source:MarkerSymbol;Acc:MGI:3031046]	GO:0007165(signal transduction);GO:0007186(G-protein coupled receptor protein signaling pathway);GO:0007608(sensory perception of smell);GO:0050896(response to stimulus)	GO:0004871(signal transducer activity);GO:0004872(receptor activity);GO:0004930(G-protein coupled receptor activity);GO:0004984(olfactory receptor activity)	GO:0016020(membrane);GO:0016021(integral to membrane)	5.10879	2.12659	0.41626	-1.26444		*	5.10879	3.13593	0.61383	-0.704089
Gchfr	M300017690	ENSMUSG00000046814	NM_177157	320415	Gchfr	GTP cyclohydrolase I feedback regulator [Source:MarkerSymbol;Acc:MGI:2443977]		GO:0016787(hydrolase activity)		1232.66	866.348	0.702829	-0.508754			1232.66	513.223	0.416355	-1.26411		*
Ppargc1a	M300017289	ENSMUSG00000046379		0	Ppargc1a	peroxisome proliferative activated receptor, gamma, coactivator 1 alpha [Source:MarkerSymbol;Acc:MGI:1342774]				5.69357	3.69125	0.648319	-0.625225			5.69357	3.8196	0.670862	-0.575911
XP_484710.3	M400002277									14.6388	8.40149	0.573919	-0.801081			14.6388	7.27787	0.497163	-1.00821		*
Mpa2	M400001703									7.47241	4.76031	0.637052	-0.650518			7.47241	1.15239	0.15422	-2.69694		**
Thrap1	M400001683	ENSMUSG00000034297	XM_109726	327987	Thrap1	thyroid hormone receptor associated protein 1 [Source:MarkerSymbol;Acc:MGI:3029632]	GO:0045944(positive regulation of transcription from RNA polymerase II promoter)	GO:0003713(transcription coactivator activity);GO:0004872(receptor activity)	GO:0000119(mediator complex)	48.8796	30.2656	0.619187	-0.691552			48.8796	28.8966	0.591178	-0.758334
Klra1	M400001524									9.79366	6.77279	0.691548	-0.532099			9.79366	2.86186	0.292215	-1.7749		*
1700031F05Rik	M400001507									7.42907	4.98017	0.670362	-0.576987			7.42907	2.4323	0.327404	-1.61086		*
-	M400001394									185.462	108.686	0.586027	-0.77096			185.462	96.5828	0.520769	-0.941285
1700018L24Rik	M400001379	ENSMUSG00000031512	XM_133991	75528	1700018L24Rik	RIKEN cDNA 1700018L24 gene [Source:MarkerSymbol;Acc:MGI:1922778]				32.2796	24.9426	0.772706	-0.372008			32.2796	18.4603	0.571888	-0.806195
Clec2i	M400001254	ENSMUSG00000030365		0	Clec2i	C-type lectin domain family 2, member i [Source:MarkerSymbol;Acc:MGI:2136650]				25.9936	17.9333	0.689913	-0.535513			25.9936	15.6764	0.603086	-0.729564
-	M400002693									9.66843	6.33483	0.655208	-0.609976			9.66843	2.74729	0.284151	-1.81527		*
Yrdc	M400001126	ENSMUSG00000028889	NM_153566	0	Yrdc	yrdC domain containing (E.coli) [Source:MarkerSymbol;Acc:MGI:2387201]	GO:0051051(negative regulation of transport)	GO:0005515(protein binding)	GO:0005624(membrane fraction)	622.739	496.735	0.797661	-0.326152			622.739	395.779	0.635545	-0.653933
Rad54l	M400001107	ENSMUSG00000028702		0	Rad54l	RAD54 like (S. cerevisiae) [Source:MarkerSymbol;Acc:MGI:894697]	GO:0006281(DNA repair);GO:0006974(response to DNA damage stimulus)	GO:0000166(nucleotide binding);GO:0003676(nucleic acid binding);GO:0003677(DNA binding);GO:0004386(helicase activity);GO:0005524(ATP binding);GO:0008026(ATP-dependent helicase activity);GO:0016787(hydrolase activity)	GO:0005634(nucleus)	96.7616	37.6701	0.389309	-1.36101		*	96.7616	50.4328	0.521207	-0.94007
5730494N06Rik	M400001001	ENSMUSG00000027341	NM_027478	638221	5730494N06Rik	RIKEN cDNA 5730494N06 gene [Source:MarkerSymbol;Acc:MGI:1917862]			GO:0016020(membrane);GO:0016021(integral to membrane)	269.48	292.583	1.08573	0.118666			269.48	164.143	0.609109	-0.715227
Cmya3	M400000984	ENSMUSG00000027022	XM_141283	241431	Cmya3	cardiomyopathy associated 3 [Source:MarkerSymbol;Acc:MGI:2685198]	GO:0008150(biological_process)	GO:0003674(molecular_function);GO:0008270(zinc ion binding);GO:0046872(metal ion binding)	GO:0005575(cellular_component)	9.84446	3.13591	0.318546	-1.65043		*	9.84446	2.83315	0.287792	-1.7969		*
4930418G15Rik	M400000870	ENSMUSG00000025916	NM_027033;NM_145692	69312	4930418G15Rik	RIKEN cDNA 4930418G15 gene [Source:MarkerSymbol;Acc:MGI:1921138]		GO:0005515(protein binding)		3.34436	1.84343	0.551205	-0.85934			3.34436	1.0987	0.328523	-1.60593		*
Col7a1	M400000848	ENSMUSG00000025650	NM_007738	12836	Col7a1	procollagen, type VII, alpha 1 [Source:MarkerSymbol;Acc:MGI:88462]	GO:0006817(phosphate transport);GO:0007155(cell adhesion)	GO:0004866(endopeptidase inhibitor activity);GO:0004867(serine-type endopeptidase inhibitor activity);GO:0005198(structural molecule activity);GO:0005515(protein binding);GO:0030020(extracellular matrix structural constituent conferring tensile strength)	GO:0005578(proteinaceous extracellular matrix);GO:0005581(collagen);GO:0005615(extracellular space);GO:0005737(cytoplasm)	48.0507	11.4254	0.237779	-2.07231		**	48.0507	43.7183	0.909836	-0.136321
Hist2h2aa1	M400008600									46.9444	193.835	4.12904	2.04581	**		46.9444	62.5807	1.33308	0.414765
-	M400002610									195.26	237.64	1.21704	0.28338			195.26	105.326	0.539413	-0.890539
Zfp406	M400000562									32.7927	27.0691	0.825463	-0.276724			32.7927	40.6582	1.23986	0.310173
NP_001013827.1	M400000548									8.72264	6.04685	0.693236	-0.528581			8.72264	10.2324	1.17309	0.230314
Dlgh4	M400000425									83.0883	74.7677	0.899859	-0.152229			83.0883	38.4987	0.463347	-1.10984		*
Vrk3	M200006179	ENSMUSG00000002205	NM_133945	101568	Vrk3	vaccinia related kinase 3 [Source:MarkerSymbol;Acc:MGI:2182465]	GO:0006468(protein amino acid phosphorylation)	GO:0000166(nucleotide binding);GO:0004672(protein kinase activity);GO:0004674(protein serine/threonine kinase activity);GO:0005524(ATP binding);GO:0016301(kinase activity);GO:0016740(transferase activity)	GO:0005634(nucleus)	289.966	303.937	1.04818	0.0678884			289.966	193.5	0.66732	-0.583549
Erbb3	M400000282									11.2074	8.78979	0.784283	-0.350554			11.2074	8.158	0.72791	-0.458167
XP_985901.1	M400000267									64.903	88.6777	1.36631	0.450286			64.903	41.1656	0.634264	-0.656844
Tph2	M400000138	ENSMUSG00000006764	NM_173391	216343	Tph2	tryptophan hydroxylase 2 [Source:MarkerSymbol;Acc:MGI:2651811]	GO:0006587(serotonin biosynthetic process from tryptophan);GO:0008152(metabolic process);GO:0009072(aromatic amino acid family metabolic process);GO:0042427(serotonin biosynthetic process)	GO:0004497(monooxygenase activity);GO:0004510(tryptophan 5(monooxygenase activity);GO:0005506(iron ion binding);GO:0016491(oxidoreductase activity);GO:0016597(amino acid binding);GO:0046872(metal ion binding)		6.42837	4.70273	0.731558	-0.450957			6.42837	2.31881	0.360715	-1.47107		*
-	M400003503									3.35787	2.51512	0.749021	-0.416922			3.35787	1.19174	0.354908	-1.49448		*
Dgkz	M400003364	ENSMUSG00000047923		0	Dgkz	diacylglycerol kinase zeta [Source:MarkerSymbol;Acc:MGI:1278339]				13.4094	9.18529	0.684988	-0.545848			13.4094	3.56655	0.265974	-1.91064		*
AA409316	M300017637	ENSMUSG00000046761	NM_134087	105732	AA409316	expressed sequence AA409316 [Source:MarkerSymbol;Acc:MGI:2145900]				124.4	73.4284	0.590259	-0.760579			124.4	77.1467	0.620149	-0.689314
XP_910153.1	M400003221									4.22723	3.13353	0.741273	-0.431922			4.22723	0.937616	0.221804	-2.17264		**
-	M400003203									4.82836	2.23672	0.463245	-1.11015		*	4.82836
4930526D03Rik	M400003077	ENSMUSG00000045794	NM_199023	277496	4930526D03Rik	RIKEN cDNA 4930526D03 gene [Source:MarkerSymbol;Acc:MGI:2685538]				3.79141	1.89931	0.500951	-0.997258			3.79141
-	M400003091									251.579	83.0023	0.329925	-1.59979		*	251.579	96.108	0.382019	-1.38828		*
Olfr670	M400002931	ENSMUSG00000044705	NM_207146	384703	Olfr670	olfactory receptor 670 [Source:MarkerSymbol;Acc:MGI:3030504]	GO:0007165(signal transduction);GO:0007186(G-protein coupled receptor protein signaling pathway);GO:0007608(sensory perception of smell);GO:0050896(response to stimulus)	GO:0004871(signal transducer activity);GO:0004872(receptor activity);GO:0004930(G-protein coupled receptor activity);GO:0004984(olfactory receptor activity)	GO:0016020(membrane);GO:0016021(integral to membrane)	4.53553	3.74883	0.826547	-0.27483			4.53553	0.675252	0.14888	-2.74777		**
Q99PT6_MOUSE	M400002917									35.1158	13.3918	0.381362	-1.39077		*	35.1158	13.5865	0.386906	-1.36994		*
Lilrb4	M400002781	ENSMUSG00000043675;ENSMUSG00000062593		0	Lilrb4	leukocyte immunoglobulin-like receptor, subfamily B, member 4 [Source:MarkerSymbol;Acc:MGI:102701]			GO:0016020(membrane);GO:0016021(integral to membrane)	18.7524	16.4772	0.878674	-0.186599			18.7524	12.4406	0.663414	-0.592019
Sorcs1	M400002762									4.75486	3.52014	0.740324	-0.433771			4.75486	3.26378	0.686408	-0.542862
-	M400002646									14.9587	15.6342	1.04516	0.0637186			14.9587	10.59	0.707947	-0.498286
Fbs1	M400002626	ENSMUSG00000042423	XM_284344	14123	Fbs1	fibrosin 1 [Source:MarkerSymbol;Acc:MGI:104648]		GO:0005125(cytokine activity);GO:0008083(growth factor activity)	GO:0005615(extracellular space)	42.4409	36.7666	0.866301	-0.20706			42.4409	37.2618	0.87797	-0.187757
Nmnat1	M300006418	ENSMUSG00000028992	XM_207858;XM_359223	66454	Nmnat1	nicotinamide nucleotide adenylyltransferase 1 [Source:MarkerSymbol;Acc:MGI:1913704]	GO:0009058(biosynthetic process);GO:0009435(NAD biosynthetic process);GO:0019363(pyridine nucleotide biosynthetic process)	GO:0000287(magnesium ion binding);GO:0000309(nicotinamide-nucleotide adenylyltransferase activity);GO:0004515(nicotinate-nucleotide adenylyltransferase activity);GO:0005515(protein binding);GO:0016740(transferase activity);GO:0016779(nucleotidyltransferase activity)	GO:0005634(nucleus)	53.8751	51.0482	0.947529	-0.0777578			53.8751	51.7428	0.960421	-0.0582606
-	M400002945									8.6504	7.73053	0.893661	-0.1622			8.6504	8.24387	0.953004	-0.0694463
-	M400002344									69.6999	90.3373	1.29609	0.374166			69.6999	59.3776	0.851904	-0.231237
Ythdf2	M400002322	ENSMUSG00000040025	NM_145393	0	Ythdf2	YTH domain family 2 [Source:MarkerSymbol;Acc:MGI:2444233]				194.558	171.144	0.879657	-0.184988			194.558	176.131	0.905288	-0.143552
Scgb3a2	M400002195	ENSMUSG00000038791	NM_054038	117158	Scgb3a2	secretoglobin, family 3A, member 2 [Source:MarkerSymbol;Acc:MGI:2153470]	GO:0008150(biological_process)	GO:0005515(protein binding)	GO:0005576(extracellular region);GO:0005615(extracellular space)	3.02352	1.90146	0.628891	-0.669118			3.02352	0.596566	0.197309	-2.34147		**
Mbd3l1	M400002178	ENSMUSG00000038691	NM_028557	73503	Mbd3l1	methyl-CpG binding domain protein 3-like 1 [Source:MarkerSymbol;Acc:MGI:1920753]	GO:0000122(negative regulation of transcription from RNA polymerase II promoter);GO:0006350(transcription);GO:0006355(regulation of transcription, DNA-dependent)	GO:0008327(methyl-CpG binding)	GO:0005634(nucleus)	43.7654	33.8513	0.773472	-0.370579			43.7654	20.9071	0.47771	-1.06579		*
Atoh8	M400002033									76.9755	51.2319	0.665561	-0.587356			76.9755	39.7047	0.515809	-0.95509
Thoc2	M400002014	ENSMUSG00000037475	XM_284697	331401	Thoc2	THO complex 2 [Source:MarkerSymbol;Acc:MGI:2442413]				61.081	50.8919	0.833187	-0.263288			61.081	76.353	1.25003	0.321961
-	M400001867									2304.95	1308.63	0.567747	-0.816681			2304.95	1415.35	0.614049	-0.703575
4631403P03Rik	M400002839	ENSMUSG00000044024	NM_153793	319262	4631403P03Rik	RIKEN cDNA 4631403P03 gene [Source:MarkerSymbol;Acc:MGI:1918044]			GO:0016020(membrane);GO:0016021(integral to membrane)	55.2962	52.4145	0.947887	-0.0772126			55.2962	47.1766	0.853161	-0.229109
-	M400005046									169.746	134.078	0.789873	-0.340307			169.746	90.8546	0.535237	-0.901749
Q8BFS0_MOUSE	M400005028	ENSMUSG00000055050		0	Q8BFS0_MOUSE	10 days neonate cortex cDNA, RIKEN full-length enriched library, clone:A830022K22 product:hypothetical protein, full insert sequence (16 days embryo head cDNA, RIKEN full-length enriched library, clone:C130018J17 product:hypothetical protein, full insert [Source:Uniprot/SPTREMBL;Acc:Q8BFS0]				13.9798	8.51598	0.609162	-0.715103			13.9798	4.2287	0.302486	-1.72506		*
Q8CDB9_MOUSE	M400004901									6.49358	2.74047	0.422028	-1.24459		*	6.49358	1.50779	0.232198	-2.10657		**
D730045B01Rik	M400004882	ENSMUSG00000054622		0	D730045B01Rik	RIKEN cDNA D730045B01 gene [Source:MarkerSymbol;Acc:MGI:1925117]				18.0455	12.725	0.705159	-0.50398			18.0455	13.3779	0.74134	-0.431793
NP_001034683.1	M400004773									17.7362	16.9877	0.957794	-0.0622133			17.7362	16.83	0.948906	-0.0756631
NP_808476.1	M400004753									20.607	16.1979	0.786038	-0.347329			20.607	15.9377	0.77341	-0.370695
4933409G03Rik	M400004632	ENSMUSG00000053896	NM_177651	0	4933409G03Rik	RIKEN cDNA 4933409G03 gene [Source:MarkerSymbol;Acc:MGI:3045336]				10.5191	8.34657	0.793465	-0.333762			10.5191	5.51472	0.524255	-0.931658
Ostb	M400004619	ENSMUSG00000053862	NM_178933	330962	Ostb	organic solute transporter beta [Source:MarkerSymbol;Acc:MGI:3582052]	GO:0006810(transport)	GO:0005215(transporter activity)	GO:0005886(plasma membrane)	4.46199	5.09392	1.14163	0.19109			4.46199	2.80816	0.629353	-0.668059
NP_001001318.1	M400004504									115.292	96.9225	0.840667	-0.250394			115.292	61.1626	0.530499	-0.914577
Q8CF48_MOUSE	M400004484									3.79653	2.57627	0.678585	-0.559398			3.79653	1.19174	0.313901	-1.67162		*
Spag16	M400004357	ENSMUSG00000053153		66722	Spag16	sperm associated antigen 16 [Source:MarkerSymbol;Acc:MGI:1913972]				5.32104	3.18704	0.59895	-0.739492			5.32104	2.22363	0.417894	-1.25879		*
Yap1	M400004341	ENSMUSG00000053110	NM_009534	0	Yap1	yes-associated protein 1 [Source:MarkerSymbol;Acc:MGI:103262]	GO:0045944(positive regulation of transcription from RNA polymerase II promoter)	GO:0003713(transcription coactivator activity);GO:0005515(protein binding);GO:0016563(transcriptional activator activity)	GO:0005667(transcription factor complex)	34.734	21.9629	0.632316	-0.661281			34.734	21.1203	0.608059	-0.717716
E130304F04Rik	M400004230	ENSMUSG00000052732	NM_175538	0	E130304F04Rik	RIKEN cDNA E130304F04 gene [Source:MarkerSymbol;Acc:MGI:2442399]	GO:0006468(protein amino acid phosphorylation)	GO:0000166(nucleotide binding);GO:0000287(magnesium ion binding);GO:0004672(protein kinase activity);GO:0004674(protein serine/threonine kinase activity);GO:0004713(protein-tyrosine kinase activity);GO:0005524(ATP binding);GO:0016301(kinase activity);GO:0016740(transferase activity);GO:0046872(metal ion binding)		14.8832	15.1859	1.02034	0.0290487			14.8832	11.5134	0.773584	-0.370369
-	M400003264									5.48454	4.14003	0.754854	-0.40573			5.48454	1.66888	0.304287	-1.71649		*
Q8C507_MOUSE	M400004092									53.4268	47.5908	0.890768	-0.166879			53.4268	32.7286	0.612588	-0.70701
4930505D03Rik	M400004069	ENSMUSG00000052302	XM_137322	74694	4930505D03Rik	RIKEN cDNA 4930505D03 gene [Source:MarkerSymbol;Acc:MGI:1921944]	GO:0032313(regulation of Rab GTPase activity)	GO:0005097(Rab GTPase activator activity)	GO:0005622(intracellular)	7.41746	4.59254	0.619153	-0.691632			7.41746	4.0272	0.542936	-0.881146
-	M400003935									9.51621	5.09341	0.535235	-0.901755			9.51621	6.09925	0.640932	-0.641756
-	M400003920									4.47546	1.84869	0.413074	-1.27553		*	4.47546	1.03783	0.231893	-2.10847		**
Bzw1	M400003801	ENSMUSG00000051223	NM_025824	66882	Bzw1	basic leucine zipper and W2 domains 1 [Source:MarkerSymbol;Acc:MGI:1914132]	GO:0006350(transcription);GO:0006355(regulation of transcription, DNA-dependent);GO:0006446(regulation of translational initiation)	GO:0003743(translation initiation factor activity)	GO:0005737(cytoplasm)	580.983	282.178	0.485692	-1.04189		*	580.983	547.603	0.942545	-0.085366
Gimap9	M400003781	ENSMUSG00000051124	NM_174960	317758	Gimap9	GTPase, IMAP family member 9 [Source:MarkerSymbol;Acc:MGI:3511744]		GO:0005525(GTP binding)		11.1948	8.0022	0.714811	-0.484367			11.1948	4.45172	0.397658	-1.3304		*
B3gnt8	M300020671	ENSMUSG00000059479	NM_146184	232984	B3gnt8	UDP-GlcNAc:betaGal beta-1,3-N-acetylglucosaminyltransferase 8 [Source:MarkerSymbol;Acc:MGI:2385269]	GO:0006486(protein amino acid glycosylation);GO:0030311(poly-N-acetyllactosamine biosynthetic process)	GO:0008378(galactosyltransferase activity);GO:0016262(protein N-acetylglucosaminyltransferase activity);GO:0016740(transferase activity);GO:0016757(transferase activity, transferring glycosyl groups)	GO:0016020(membrane)	12.9997	15.2958	1.17663	0.23466			12.9997	6.92808	0.532942	-0.907951
-	M400003172									15.8634	16.3544	1.03095	0.0439764			15.8634	14.4635	0.911752	-0.133286
XP_915909.1	M400003520									1756.67	1981.68	1.12809	0.173884			1756.67	1934.09	1.101	0.13881
-	M400007067									6.22955	6.04447	0.97029	-0.0435115			6.22955	1.76909	0.283984	-1.81612		*
Stfa2l1	M400006907	ENSMUSG00000059657	NM_173869	268885	Stfa2l1	stefin A2 like 1 [Source:MarkerSymbol;Acc:MGI:3524944]		GO:0004869(cysteine protease inhibitor activity)	GO:0005622(intracellular)	6.86382	6.49563	0.946358	-0.0795419			6.86382	2.05802	0.299836	-1.73776		*
Ear5	M400006890	ENSMUSG00000059606	NM_019398	54159	Ear5	eosinophil-associated, ribonuclease A family, member 5 [Source:MarkerSymbol;Acc:MGI:1858598]		GO:0003676(nucleic acid binding);GO:0004518(nuclease activity);GO:0004519(endonuclease activity);GO:0004522(pancreatic ribonuclease activity);GO:0016787(hydrolase activity)	GO:0005615(extracellular space)	5.85511	2.91011	0.49702	-1.00862		*	5.85511	1.42086	0.24267	-2.04293		**
-	M400006739									766.843	472.106	0.61565	-0.699819			766.843	440.532	0.574475	-0.799685
NP_001005371.1	M400006711									14.8189	14.7386	0.994576	-0.00784651			14.8189	11.2726	0.760688	-0.394624
-	M400006516									44.4992	37.2136	0.836276	-0.257949			44.4992	22.5313	0.506331	-0.981848
-	M400006503									4.84188	3.64301	0.752396	-0.410436			4.84188	0.990241	0.204516	-2.28972		**
8430427H17Rik	M400007373	ENSMUSG00000061411	NM_001001986	329540	8430427H17Rik	RIKEN cDNA 8430427H17 gene [Source:MarkerSymbol;Acc:MGI:1918765]				12.6169	8.73725	0.692503	-0.530108			12.6169	4.9052	0.388779	-1.36298		*
-	M400006309									4740.3	3023.77	0.637887	-0.648628			4740.3	1181.63	0.249273	-2.0042		**
Olfr494	M400006715	ENSMUSG00000059227;ENSMUSG00000059031	NM_146737	258732	Olfr494	olfactory receptor 494 [Source:MarkerSymbol;Acc:MGI:3030328]	GO:0007165(signal transduction);GO:0007186(G-protein coupled receptor protein signaling pathway);GO:0007608(sensory perception of smell);GO:0050896(response to stimulus)	GO:0001584(rhodopsin-like receptor activity);GO:0004871(signal transducer activity);GO:0004872(receptor activity);GO:0004930(G-protein coupled receptor activity);GO:0004984(olfactory receptor activity)	GO:0016020(membrane);GO:0016021(integral to membrane)	7.61209	3.24751	0.426626	-1.22896		*	7.61209	3.50461	0.460401	-1.11904		*
Q8BS28_MOUSE	M400006117									39.9796	31.2769	0.78232	-0.35417			39.9796	12.0371	0.30108	-1.73178		*
-	M400005983									2.34884	1.62023	0.6898	-0.535751			2.34884	0.534627	0.227613	-2.13534		**
Olfr1459	M400005952	ENSMUSG00000057503	NM_146689	258684	Olfr1459	olfactory receptor 1459 [Source:MarkerSymbol;Acc:MGI:3031293]	GO:0007165(signal transduction);GO:0007186(G-protein coupled receptor protein signaling pathway);GO:0007608(sensory perception of smell);GO:0050896(response to stimulus)	GO:0004871(signal transducer activity);GO:0004872(receptor activity);GO:0004930(G-protein coupled receptor activity);GO:0004984(olfactory receptor activity)	GO:0016020(membrane);GO:0016021(integral to membrane)	18.5177	17.4863	0.944305	-0.0826746			18.5177	16.6081	0.896878	-0.157016
Cml1	M400005766	ENSMUSG00000057103	NM_023160	434057	Cml1	camello-like 1 [Source:MarkerSymbol;Acc:MGI:1913366]	GO:0007162(negative regulation of cell adhesion);GO:0008152(metabolic process)	GO:0008080(N-acetyltransferase activity);GO:0016740(transferase activity)	GO:0005615(extracellular space);GO:0005743(mitochondrial inner membrane);GO:0005783(endoplasmic reticulum);GO:0005794(Golgi apparatus);GO:0016021(integral to membrane)	12.1718	20.2328	1.66228	0.733159			12.1718	12.1649	0.999438	-0.000811295
Cfhr1	M400005747	ENSMUSG00000026365;ENSMUSG00000057037		214403	Cfhr1	complement factor H-related 1 [Source:MarkerSymbol;Acc:MGI:2138169]				27.0172	72.2981	2.676	1.42008	*		27.0172	8.66624	0.320767	-1.6404		*
Rbed1	M400005599	ENSMUSG00000056698	NM_144917	232089	Rbed1	RNA binding motif and ELMO domain 1 [Source:MarkerSymbol;Acc:MGI:2445168]	GO:0006909(phagocytosis);GO:0006915(apoptosis)		GO:0005856(cytoskeleton)	66.7251	57.2329	0.857741	-0.221385			66.7251	54.6739	0.819391	-0.287376
Q8C9W2_MOUSE	M400005575									3.71405	1.95287	0.525807	-0.927394			3.71405	0.789816	0.212656	-2.2334		**
A030004J04Rik	M400005452	ENSMUSG00000056270	NM_175424	109314	A030004J04Rik	RIKEN cDNA A030004J04 gene [Source:MarkerSymbol;Acc:MGI:1925680]				92.4413	3.86043	0.0417609	-4.5817		***	92.4413	13.0679	0.141364	-2.82251		**
Npm3	M400005434	ENSMUSG00000056209	NM_008723	18150	Npm3	nucleoplasmin 3 [Source:MarkerSymbol;Acc:MGI:894653]				525.278	403.326	0.767833	-0.381135			525.278	680.696	1.29588	0.373929
BC050777	M400005334	ENSMUSG00000055882	NM_183181	241850	BC050777	cDNA sequence BC050777 [Source:MarkerSymbol;Acc:MGI:3607711]				15.9431	12.7213	0.797923	-0.325679			15.9431	18.3984	1.15401	0.20665
1700034H15Rik	M400005314	ENSMUSG00000055833		0	1700034H15Rik	RIKEN cDNA 1700034H15 gene [Source:MarkerSymbol;Acc:MGI:1921515]				4.61006	2.63318	0.571181	-0.80798			4.61006	1.0987	0.238327	-2.06899		**
Zfp458	M400005192									11.0365	7.17452	0.65007	-0.621332			11.0365	10.775	0.976303	-0.0345995
Maf	M400005175	ENSMUSG00000055435		0	Maf	avian musculoaponeurotic fibrosarcoma (v-maf) AS42 oncogene homolog [Source:MarkerSymbol;Acc:MGI:96909]	GO:0000074(regulation of progression through cell cycle);GO:0001816(cytokine production);GO:0006350(transcription);GO:0006355(regulation of transcription, DNA-dependent);GO:0009987(cellular process);GO:0045449(regulation of transcription);GO:0045944(positive regulation of transcription from RNA polymerase II promoter)	GO:0003677(DNA binding);GO:0003700(transcription factor activity);GO:0005515(protein binding);GO:0043565(sequence-specific DNA binding);GO:0046983(protein dimerization activity)	GO:0005634(nucleus);GO:0005737(cytoplasm)	12.7255	11.821	0.928925	-0.106366			12.7255	5.63753	0.443012	-1.17458		*
4930471M23Rik	M400010362	ENSMUSG00000029175		0	4930471M23Rik	RIKEN cDNA 4930471M23 gene [Source:MarkerSymbol;Acc:MGI:1922169]	GO:0008150(biological_process)	GO:0003674(molecular_function)	GO:0005764(lysosome);GO:0016020(membrane);GO:0016021(integral to membrane)	145.622	93.2801	0.640563	-0.642587			145.622	90.3381	0.620361	-0.688821
Olfr1490	M400010192	ENSMUSG00000061387		258098	Olfr1490	olfactory receptor 1490 [Source:MarkerSymbol;Acc:MGI:3031324]	GO:0007165(signal transduction);GO:0007186(G-protein coupled receptor protein signaling pathway);GO:0007608(sensory perception of smell);GO:0050896(response to stimulus)	GO:0004871(signal transducer activity);GO:0004872(receptor activity);GO:0004930(G-protein coupled receptor activity);GO:0004984(olfactory receptor activity)	GO:0016020(membrane);GO:0016021(integral to membrane)	4.68263	4.81552	1.02838	0.0403721			4.68263	0.810273	0.173038	-2.53084		**
BC003885	M400009632	ENSMUSG00000032215;ENSMUSG00000053740		0	BC003885	cDNA sequence BC003885 [Source:MarkerSymbol;Acc:MGI:2681840]	GO:0006412(translation)	GO:0003735(structural constituent of ribosome)	GO:0005622(intracellular);GO:0005634(nucleus);GO:0005840(ribosome)	395.929	262.707	0.663521	-0.591786			395.929	185.199	0.467758	-1.09617		*
Rbmxrt	M400009572	ENSMUSG00000037070;ENSMUSG00000031134;ENSMUSG00000049235	NM_009033	19656	Rbmxrt	RNA binding motif protein, X chromosome retrogene [Source:MarkerSymbol;Acc:MGI:1343045]	GO:0006396(RNA processing);GO:0006397(mRNA processing);GO:0008380(RNA splicing)	GO:0000166(nucleotide binding);GO:0003676(nucleic acid binding);GO:0003723(RNA binding)	GO:0005634(nucleus);GO:0005681(spliceosome);GO:0030529(ribonucleoprotein complex)	970.076	554.632	0.571741	-0.806567			970.076	541.878	0.558594	-0.840129
Glo1	M400009038	ENSMUSG00000075391;ENSMUSG00000024026		109801	Glo1	glyoxalase 1 [Source:MarkerSymbol;Acc:MGI:95742]	GO:0005975(carbohydrate metabolic process);GO:0006916(anti-apoptosis)	GO:0004462(lactoylglutathione lyase activity);GO:0008270(zinc ion binding);GO:0016829(lyase activity);GO:0046872(metal ion binding)	GO:0005737(cytoplasm)	1573.15	1323.76	0.841472	-0.249013			1573.15	1323.3	0.841178	-0.249518
Nudt15	M400008948	ENSMUSG00000033405;ENSMUSG00000053472	NM_172527	214254	Nudt15	nudix (nucleoside diphosphate linked moiety X)-type motif 15 [Source:MarkerSymbol;Acc:MGI:2443366]	GO:0000302(response to reactive oxygen species);GO:0009217(purine deoxyribonucleoside triphosphate catabolic process)	GO:0000287(magnesium ion binding);GO:0008413(8(oxo-7,8(dihydroguanine triphosphatase activity);GO:0016787(hydrolase activity);GO:0030145(manganese ion binding);GO:0046872(metal ion binding)	GO:0005575(cellular_component)	92.1261	90.2972	0.980148	-0.028929			92.1261	45.7717	0.496838	-1.00915		*
-	M400017565									3.91664	2.069	0.52826	-0.920681			3.91664
Olfr104	M400008578	ENSMUSG00000073398;ENSMUSG00000049234;ENSMUSG00000060137;ENSMUSG00000064169;ENSMUSG00000059346;ENSMUSG00000049618		257948	Olfr104	olfactory receptor 104 [Source:MarkerSymbol;Acc:MGI:2177487]	GO:0007165(signal transduction);GO:0007186(G-protein coupled receptor protein signaling pathway);GO:0007608(sensory perception of smell);GO:0050896(response to stimulus)	GO:0004871(signal transducer activity);GO:0004872(receptor activity);GO:0004930(G-protein coupled receptor activity);GO:0004984(olfactory receptor activity)	GO:0016020(membrane);GO:0016021(integral to membrane)	31.4091	24.7142	0.786848	-0.345843			31.4091	21.6899	0.690562	-0.534157
-	M400008407									9.11894	7.39624	0.811086	-0.302073			9.11894	5.20187	0.570447	-0.809836
1700011J10Rik	M400008379	ENSMUSG00000063714	NM_183265	0	1700011J10Rik	RIKEN cDNA 1700011J10 gene [Source:MarkerSymbol;Acc:MGI:1914936]				51.7443	67.371	1.302	0.380728			51.7443	46.2858	0.894511	-0.16083
-	M400008235									1933.95	1911.72	0.988507	-0.0166773			1933.95	1811.07	0.936459	-0.0947125
-	M400015364									9.04446	7.28583	0.805558	-0.31194			9.04446	4.80605	0.531381	-0.912181
Olfr1450	M400008026	ENSMUSG00000062892	NM_146371	0	Olfr1450	olfactory receptor 1450 [Source:MarkerSymbol;Acc:MGI:3031284]	GO:0007165(signal transduction);GO:0007186(G-protein coupled receptor protein signaling pathway);GO:0007608(sensory perception of smell);GO:0050896(response to stimulus)	GO:0004871(signal transducer activity);GO:0004872(receptor activity);GO:0004930(G-protein coupled receptor activity);GO:0004984(olfactory receptor activity)	GO:0016020(membrane);GO:0016021(integral to membrane)	4.71758	2.45991	0.521436	-0.939439			4.71758	0.943722	0.200044	-2.32161		**
XM_983992.1	M400008013									16.2118	12.6112	0.777904	-0.362337			16.2118	9.53706	0.58828	-0.765426
-	M400007834									144.953	146.127	1.0081	0.0116415			144.953	147.725	1.01912	0.0273296
-	M400007807									8.74226	4.64157	0.530935	-0.913392			8.74226	4.52323	0.517398	-0.950652
-	M400007659									79.0403	80.8321	1.02267	0.0323403			79.0403	80.9901	1.02467	0.0351575
-	M400007641									3.23357	1.56383	0.483624	-1.04804		*	3.23357	0.898274	0.277796	-1.8479		*
U2af1	M400007456									625.41	579.138	0.926013	-0.110896			625.41	764.059	1.22169	0.288881
BC043476	M400007419	ENSMUSG00000061544	XM_354987	0	BC043476	cDNA sequence BC043476 [Source:MarkerSymbol;Acc:MGI:2679295]	GO:0006355(regulation of transcription, DNA-dependent)	GO:0003676(nucleic acid binding);GO:0008270(zinc ion binding);GO:0046872(metal ion binding)	GO:0005622(intracellular);GO:0005634(nucleus)	34.5756	26.2815	0.760115	-0.39571			34.5756	23.3197	0.674455	-0.568205
3110043A19Rik	M400007287	ENSMUSG00000060808	XM_484036	73216	3110043A19Rik	RIKEN cDNA 3110043A19 gene [Source:MarkerSymbol;Acc:MGI:1920466]				3.35275	3.24343	0.967396	-0.0478222			3.35275	1.30737	0.389939	-1.35868		*
-	M400007275									5.58274	4.14331	0.742165	-0.430189			5.58274	2.64097	0.473061	-1.0799		*
Olfr973	M400007090	ENSMUSG00000060107	NM_146613	258606	Olfr973	olfactory receptor 973 [Source:MarkerSymbol;Acc:MGI:3030807]	GO:0007165(signal transduction);GO:0007186(G-protein coupled receptor protein signaling pathway);GO:0007608(sensory perception of smell);GO:0050896(response to stimulus)	GO:0004871(signal transducer activity);GO:0004872(receptor activity);GO:0004930(G-protein coupled receptor activity);GO:0004984(olfactory receptor activity)	GO:0016020(membrane);GO:0016021(integral to membrane)	53.4197	45.626	0.854104	-0.227516			53.4197	39.0704	0.731386	-0.451295
-	M400012306									241.144	173.079	0.717743	-0.47846			241.144	76.3684	0.316693	-1.65884		*
-	M400012186									8.81996	5.49033	0.622489	-0.68388			8.81996	2.91555	0.330563	-1.597		*
-	M400012166									21.1277	16.759	0.793223	-0.334201			21.1277	12.2468	0.579658	-0.786727
-	M400012077									20.1754	14.7357	0.730381	-0.453279			20.1754	11.8842	0.589046	-0.763548
-	M400012066									6.32589	3.19112	0.504454	-0.987206			6.32589	1.46021	0.23083	-2.1151		**
-	M400011977									4.56154	1.90294	0.417169	-1.2613		*	4.56154
-	M400011964									12.8664	10.7574	0.836079	-0.258288			12.8664	4.08914	0.317814	-1.65374		*
-	M400011825									17.0243	17.3114	1.01686	0.024126			17.0243	13.7277	0.806356	-0.310512
-	M400011805									716.189	676.993	0.945272	-0.081198			716.189	676.315	0.944325	-0.0826445
-	M400011667									2.48852	2.23411	0.897767	-0.155587			2.48852	0.441589	0.177451	-2.49451		**
-	M400011648									5.50733	4.02718	0.73124	-0.451583			5.50733	2.42513	0.440345	-1.18329		*
-	M400011519									54.7649	42.1561	0.769764	-0.377512			54.7649	33.3525	0.609012	-0.715458
-	M400011502									243.31	192.348	0.790547	-0.339077			243.31	254.126	1.04445	0.0627475
-	M400011372									4.39073	3.86185	0.879547	-0.185168			4.39073
-	M400011350									65.0164	34.082	0.524206	-0.931794			65.0164	40.6034	0.62451	-0.679202
-	M400011214									161.49	250.986	1.55419	0.636161			161.49	78.5361	0.486321	-1.04002		*
-	M400011194									2208.96	1374.46	0.622217	-0.68451			2208.96	406.037	0.183813	-2.44369		**
Mageb1	M400011066									3.17671						3.17671
-	M400011048									3.41376	1.39533	0.408737	-1.29076		*	3.41376	1.40651	0.412013	-1.27924		*
-	M400010914									74.286	73.4849	0.989215	-0.0156437			74.286	77.3721	1.04154	0.0587221
-	M400010888									562.21	502.414	0.893641	-0.162233			562.21	593.463	1.05559	0.0780471
-	M400010758									2.72742	1.56123	0.572419	-0.804858			2.72742	0.495284	0.181594	-2.46121		**
Cbx3|Cbx3|Cbx3	M400010745									112.783	150.326	1.33288	0.414542			112.783	198.399	1.75912	0.814851
-	M400015486									5.9129	5.14839	0.870704	-0.199746			5.9129	1.15239	0.194895	-2.35923		**
-	M400015440									9.35822	6.77879	0.724368	-0.465206			9.35822	3.21008	0.343023	-1.54362		*
-	M400015117									32.6166	20.1678	0.61833	-0.693551			32.6166	17.5065	0.536736	-0.897714
-	M400015083									20.7179	20.2259	0.976255	-0.03467			20.7179	9.75077	0.470645	-1.08729		*
-	M400014721									20.7965	12.8329	0.61707	-0.696493			20.7965	5.22125	0.251064	-1.99388		*
-	M400014668									18.7411	24.8237	1.32456	0.405511			18.7411	14.9201	0.796119	-0.328944
-	M400014394									72.306	85.9936	1.1893	0.250115			72.306	49.6231	0.686294	-0.543102
9030605E09Rik	M400005786	ENSMUSG00000057138	NM_201360	380997	9030605E09Rik	RIKEN cDNA 9030605E09 gene [Source:MarkerSymbol;Acc:MGI:3584268]	GO:0006118(electron transport)	GO:0004497(monooxygenase activity);GO:0005506(iron ion binding);GO:0016491(oxidoreductase activity);GO:0016712(oxidoreductase activity, acting on paired donors, with incorporation or reduction of molecular oxygen, reduced flavin or flavopr);GO:0020037(heme binding);GO:0046872(metal ion binding)	GO:0016020(membrane)	34.5905	36.8177	1.06439	0.0900242			34.5905	30.7323	0.88846	-0.170621
-	M400014028									18.6905	15.6887	0.839394	-0.252581			18.6905	5.86294	0.313686	-1.67261		*
-	M400013990									7.84205	5.70656	0.727687	-0.458611			7.84205	3.57159	0.455441	-1.13466		*
-	M400013705									111.904	128.925	1.15211	0.204277			111.904	96.1027	0.858799	-0.219608
-	M400013673									8.27335	8.84715	1.06936	0.0967421			8.27335	5.2008	0.628621	-0.669738
-	M400013378									2.62722	3.36177	1.27959	0.355685			2.62722	2.60056	0.989853	-0.0147143
-	M400013330									47.4453	36.0372	0.759551	-0.396782			47.4453	28.2501	0.595424	-0.748011
-	M400013111									85.7648	88.716	1.03441	0.0488078			85.7648	58.3856	0.680763	-0.554774
-	M400013078									5.60241	5.54457	0.989676	-0.0149717			5.60241	3.73985	0.667543	-0.583067
-	M400012825									8.72776	8.39934	0.96237	-0.0553369			8.72776	4.28239	0.490663	-1.02719		*
-	M400012687									8.4465	5.99142	0.709338	-0.495455			8.4465	4.0272	0.47679	-1.06857		*
-	M400012571									353.546	299.106	0.846016	-0.241243			353.546	164.986	0.466661	-1.09955		*
-	M400012557									3.36817	1.73228	0.514308	-0.959295			3.36817	1.56759	0.465414	-1.10341		*
-	M400012433									72.7544	255.984	3.51847	1.81495	*		72.7544	21.9718	0.301999	-1.72738		*
-	M400012416									9.58136	5.60289	0.584769	-0.77406			9.58136	8.98948	0.938225	-0.0919937
Hist2h2aa1|H2afx|Hist1h2ab|Hist1h2ab|Hist1h2af	M400012322									8146.49	5499.84	0.675117	-0.56679			8146.49	5249.14	0.644344	-0.634097
Cysltr1	M400004252	ENSMUSG00000052821	NM_021476	58861	Cysltr1	cysteinyl leukotriene receptor 1 [Source:MarkerSymbol;Acc:MGI:1926218]				2.70174	2.3512	0.870254	-0.200492			2.70174	0.696778	0.257899	-1.95512		*
Tagln3	M300003441	ENSMUSG00000022658	NM_019754;NM_019754;NM_019754;NM_019754;NM_019754	56370	Tagln3	transgelin 3 [Source:MarkerSymbol;Acc:MGI:1926784]	GO:0007417(central nervous system development);GO:0007517(muscle development)			7.05845	7.73676	1.0961	0.132379			7.05845	2.60056	0.368432	-1.44053		*
Cxcr3	M300020938	ENSMUSG00000050232	NM_009910	12766	Cxcr3	chemokine (C-X-C motif) receptor 3 [Source:MarkerSymbol;Acc:MGI:1277207]	GO:0006935(chemotaxis);GO:0006952(defense response);GO:0007165(signal transduction);GO:0007186(G-protein coupled receptor protein signaling pathway)	GO:0001584(rhodopsin-like receptor activity);GO:0004871(signal transducer activity);GO:0004872(receptor activity);GO:0004930(G-protein coupled receptor activity);GO:0004950(chemokine receptor activity);GO:0016493(C-C chemokine receptor activity);GO:0016494(C-X-C chemokine receptor activity);GO:0045028(purinergic nucleotide receptor activity, G-protein coupled)	GO:0016020(membrane);GO:0016021(integral to membrane)	4.69288	4.31159	0.918751	-0.122254			4.69288	0.589391	0.125593	-2.99318		**
Tacr2	M200002666	ENSMUSG00000020081	NM_009314	100044873	Tacr2	tachykinin receptor 2 [Source:MarkerSymbol;Acc:MGI:98477]	GO:0007165(signal transduction);GO:0007186(G-protein coupled receptor protein signaling pathway)	GO:0001584(rhodopsin-like receptor activity);GO:0004871(signal transducer activity);GO:0004872(receptor activity);GO:0004930(G-protein coupled receptor activity);GO:0004983(neuropeptide Y receptor activity);GO:0004995(tachykinin receptor activity)	GO:0005886(plasma membrane);GO:0016020(membrane);GO:0016021(integral to membrane)	7.44025	4.4767	0.601686	-0.732917			7.44025	3.61093	0.485324	-1.04298		*
Drd2	M200013811	ENSMUSG00000032259	NM_010077	13489	Drd2	dopamine receptor 2 [Source:MarkerSymbol;Acc:MGI:94924]	GO:0007165(signal transduction);GO:0007186(G-protein coupled receptor protein signaling pathway);GO:0007195(dopamine receptor, adenylate cyclase inhibiting pathway);GO:0042493(response to drug)	GO:0001584(rhodopsin-like receptor activity);GO:0001591(dopamine D2 receptor-like receptor activity);GO:0004871(signal transducer activity);GO:0004872(receptor activity);GO:0004930(G-protein coupled receptor activity);GO:0004935(adrenoceptor activity);GO:0004952(dopamine receptor activity);GO:0004983(neuropeptide Y receptor activity);GO:0035240(dopamine binding)	GO:0016020(membrane);GO:0016021(integral to membrane)	5.14086	5.03917	0.980219	-0.0288243			5.14086	2.26512	0.44061	-1.18242		*
H2-Eb1	M300004076	ENSMUSG00000047756	NM_181075	330173	H2-Eb1	histocompatibility 2, class II antigen E beta [Source:MarkerSymbol;Acc:MGI:95901]				8.4773	5.59977	0.660561	-0.598236			8.4773	3.82785	0.451541	-1.14707		*
Serpine1	M400002006	ENSMUSG00000037411	NM_008871	0	Serpine1	serine (or cysteine) peptidase inhibitor, clade E, member 1 [Source:MarkerSymbol;Acc:MGI:97608]	GO:0045765(regulation of angiogenesis)	GO:0002020(protease binding);GO:0004866(endopeptidase inhibitor activity);GO:0004867(serine-type endopeptidase inhibitor activity);GO:0005515(protein binding);GO:0008243(plasminogen activator activity)	GO:0005615(extracellular space)	41.4492	18.3764	0.443348	-1.17349		*	41.4492	26.1945	0.631967	-0.662078
Pigr	M200001683	ENSMUSG00000026417	NM_011082	18703	Pigr	polymeric immunoglobulin receptor [Source:MarkerSymbol;Acc:MGI:103080]		GO:0004872(receptor activity)	GO:0016020(membrane);GO:0016021(integral to membrane)	84.6314	78.4127	0.92652	-0.110105			84.6314	54.9695	0.649517	-0.622561
Ubtf	M200001081	ENSMUSG00000020923	NM_011551	21429	Ubtf	upstream binding transcription factor, RNA polymerase I [Source:MarkerSymbol;Acc:MGI:98512]	GO:0006350(transcription);GO:0006355(regulation of transcription, DNA-dependent)	GO:0003677(DNA binding);GO:0003700(transcription factor activity);GO:0005515(protein binding)	GO:0005634(nucleus);GO:0005730(nucleolus)	428.53	364.967	0.851672	-0.231631			428.53	190.127	0.443671	-1.17244		*
Arnt	M300001418	ENSMUSG00000015522		11863	Arnt	aryl hydrocarbon receptor nuclear translocator [Source:MarkerSymbol;Acc:MGI:88071]	GO:0000160(two-component signal transduction system (phosphorelay));GO:0006350(transcription);GO:0006355(regulation of transcription, DNA-dependent);GO:0007165(signal transduction);GO:0009636(response to toxin);GO:0045449(regulation of transcription);GO:0045941(positive regulation of transcription);GO:0045944(positive regulation of transcription from RNA polymerase II promoter)	GO:0000155(two-component sensor activity);GO:0003677(DNA binding);GO:0003700(transcription factor activity);GO:0003713(transcription coactivator activity);GO:0004871(signal transducer activity);GO:0004872(receptor activity);GO:0005515(protein binding);GO:0016563(transcriptional activator activity);GO:0030528(transcription regulator activity)	GO:0005634(nucleus);GO:0005667(transcription factor complex);GO:0005737(cytoplasm)	10.7198	9.30091	0.867636	-0.204838			10.7198	6.24094	0.582186	-0.780447
Esco2	M200014513	ENSMUSG00000022034	NM_028039	71988	Esco2	establishment of cohesion 1 homolog 2 (S. cerevisiae) [Source:MarkerSymbol;Acc:MGI:1919238]	GO:0007049(cell cycle)	GO:0008270(zinc ion binding);GO:0008415(acyltransferase activity);GO:0016740(transferase activity);GO:0046872(metal ion binding)	GO:0005634(nucleus)	122.948	45.8461	0.372891	-1.42318		*	122.948	66.5978	0.541675	-0.884502
-	M400019495									3.93943	1.7359	0.440648	-1.1823		*	3.93943	0.99238	0.251909	-1.98902		*
-	M400019329									3.42825	1.56598	0.456788	-1.1304		*	3.42825	1.31348	0.383133	-1.38408		*
-	M400018477									46.7208	44.5699	0.953964	-0.0679928			46.7208	35.4046	0.757791	-0.400128
Olfr825	M400006178	ENSMUSG00000058084	NM_146677	0	Olfr825	olfactory receptor 825 [Source:MarkerSymbol;Acc:MGI:3030659]	GO:0007165(signal transduction);GO:0007186(G-protein coupled receptor protein signaling pathway);GO:0007608(sensory perception of smell);GO:0050896(response to stimulus)	GO:0004871(signal transducer activity);GO:0004872(receptor activity);GO:0004930(G-protein coupled receptor activity);GO:0004984(olfactory receptor activity)	GO:0016020(membrane);GO:0016021(integral to membrane)	3.32991						3.32991	1.15239	0.346073	-1.53085		*
-	M400017664									5.97815	5.20671	0.870956	-0.199328			5.97815	3.75527	0.628165	-0.670783
-	M400017448									5.33647	4.08601	0.765677	-0.385192			5.33647	2.23905	0.419576	-1.253		*
-	M400016682									15.761	17.5368	1.11267	0.154027			15.761	9.78828	0.621046	-0.687228
-	M400016534									4.67106	2.96866	0.635542	-0.653942			4.67106	1.41369	0.302648	-1.72429		*
-	M400016167									12.3115	12.0993	0.982772	-0.0250716			12.3115	7.62717	0.619518	-0.690781
-	M400016125									4.07497	4.65256	1.14174	0.191238			4.07497	3.15639	0.77458	-0.368513
-	M400015826									36.2614	34.7527	0.958394	-0.0613093			36.2614	37.7153	1.0401	0.0567155
-	M400006053									5.28059	4.70154	0.890344	-0.167566			5.28059	3.83395	0.726047	-0.461865
-	M400010941									4.15783	2.85179	0.685883	-0.543966			4.15783	5.25449	1.26376	0.337719
V1rh16	M400008871	ENSMUSG00000069299;ENSMUSG00000061022	NM_134240	171274	V1rh16	vomeronasal 1 receptor, H16 [Source:MarkerSymbol;Acc:MGI:2159679]	GO:0007186(G-protein coupled receptor protein signaling pathway);GO:0019236(response to pheromone)	GO:0001584(rhodopsin-like receptor activity);GO:0004872(receptor activity);GO:0005550(pheromone binding);GO:0016503(pheromone receptor activity)	GO:0005887(integral to plasma membrane);GO:0016021(integral to membrane)	1.95669	1.45342	0.742796	-0.428963			1.95669
-	M400007343									4.62958	2.12177	0.458308	-1.12561		*	4.62958	1.27413	0.275215	-1.86137		*
V1rl1	M300016300	ENSMUSG00000045340	NM_134228	171262	V1rl1	vomeronasal 1 receptor, L1 [Source:MarkerSymbol;Acc:MGI:2159699]	GO:0007186(G-protein coupled receptor protein signaling pathway);GO:0019236(response to pheromone)	GO:0001584(rhodopsin-like receptor activity);GO:0004872(receptor activity);GO:0005550(pheromone binding);GO:0016503(pheromone receptor activity)	GO:0005887(integral to plasma membrane);GO:0016021(integral to membrane)	3.80815	3.57988	0.940058	-0.0891788			3.80815	1.96845	0.516904	-0.952032
Ccr2	M200002339	ENSMUSG00000049103	NM_009915	12772	Ccr2	chemokine (C-C motif) receptor 2 [Source:MarkerSymbol;Acc:MGI:106185]	GO:0006935(chemotaxis);GO:0006952(defense response);GO:0006954(inflammatory response);GO:0006955(immune response);GO:0006959(humoral immune response);GO:0006968(cellular defense response);GO:0007165(signal transduction);GO:0007186(G-protein coupled receptor protein signaling pathway);GO:0019221(cytokine and chemokine mediated signaling pathway);GO:0019233(sensory perception of pain);GO:0030097(he…	GO:0001584(rhodopsin-like receptor activity);GO:0004871(signal transducer activity);GO:0004872(receptor activity);GO:0004930(G-protein coupled receptor activity);GO:0005515(protein binding);GO:0016493(C-C chemokine receptor activity);GO:0019955(cytokine binding)	GO:0005886(plasma membrane);GO:0016020(membrane);GO:0016021(integral to membrane)	2.82381	1.73517	0.614479	-0.702565			2.82381	0.683497	0.242048	-2.04663		**
Fgf3	M200002051	ENSMUSG00000031074	NM_008007	14174	Fgf3	fibroblast growth factor 3 [Source:MarkerSymbol;Acc:MGI:95517]	GO:0000074(regulation of progression through cell cycle);GO:0001759(induction of an organ);GO:0007165(signal transduction);GO:0008283(cell proliferation);GO:0048538(thymus development)	GO:0005104(fibroblast growth factor receptor binding);GO:0008083(growth factor activity)	GO:0005615(extracellular space);GO:0005634(nucleus);GO:0005783(endoplasmic reticulum)		2.07042						0.944792
Irf4	M200001883	ENSMUSG00000021356	NM_013674	16364	Irf4	interferon regulatory factor 4 [Source:MarkerSymbol;Acc:MGI:1096873]	GO:0006350(transcription);GO:0006355(regulation of transcription, DNA-dependent);GO:0042110(T cell activation);GO:0043011(myeloid dendritic cell differentiation);GO:0045082(positive regulation of interleukin-10 biosynthetic process);GO:0045086(positive regulation of interleukin-2 biosynthetic process);GO:0045368(positive regulation of interleukin-13 biosynthetic process);GO:0045404(positive regul…	GO:0003677(DNA binding);GO:0003700(transcription factor activity);GO:0008134(transcription factor binding);GO:0016563(transcriptional activator activity)	GO:0005622(intracellular);GO:0005634(nucleus)	2.74606						2.74606	1.5139	0.551298	-0.859094
Lrrn1	M200001856	ENSMUSG00000034648	NM_008516	16979	Lrrn1	leucine rich repeat protein 1, neuronal [Source:MarkerSymbol;Acc:MGI:106038]		GO:0005515(protein binding)	GO:0005615(extracellular space);GO:0016020(membrane);GO:0016021(integral to membrane)	57.6175	116.662	2.02478	1.01776	*		57.6175	14.7784	0.256492	-1.96301		*
Gem	M200001705	ENSMUSG00000028214	NM_010276	0	Gem	GTP binding protein (gene overexpressed in skeletal muscle) [Source:MarkerSymbol;Acc:MGI:99844]	GO:0007264(small GTPase mediated signal transduction)	GO:0000166(nucleotide binding);GO:0005525(GTP binding)	GO:0016020(membrane)	28.2869	48.2476	1.70565	0.770321			28.2869	21.2195	0.750151	-0.414747
Lama5	M200001689	ENSMUSG00000015647	XM_203796	0	Lama5	laminin, alpha 5 [Source:MarkerSymbol;Acc:MGI:105382]	GO:0001658(ureteric bud branching);GO:0001738(morphogenesis of a polarized epithelium);GO:0001755(neural crest cell migration);GO:0006413(translational initiation);GO:0007155(cell adhesion);GO:0007431(salivary gland development);GO:0007517(muscle development);GO:0008152(metabolic process);GO:0009887(organ morphogenesis);GO:0016331(morphogenesis of embryonic epithelium);GO:0030155(regulation of ce…	GO:0003743(translation initiation factor activity);GO:0004872(receptor activity);GO:0005102(receptor binding);GO:0005178(integrin binding);GO:0005201(extracellular matrix structural constituent);GO:0005515(protein binding);GO:0016491(oxidoreductase activity)	GO:0005578(proteinaceous extracellular matrix);GO:0005604(basement membrane);GO:0005605(basal lamina);GO:0005606(laminin-1 complex);GO:0005615(extracellular space);GO:0031012(extracellular matrix)	75.0596	60.4142	0.804883	-0.313149			75.0596	36.2421	0.482845	-1.05037		*
Llgl1	M200001515	ENSMUSG00000020536	NM_008502	0	Llgl1	lethal giant larvae homolog 1 (Drosophila) [Source:MarkerSymbol;Acc:MGI:102682]	GO:0006461(protein complex assembly);GO:0007420(brain development);GO:0030866(cortical actin cytoskeleton organization and biogenesis);GO:0035090(maintenance of apical/basal cell polarity)	GO:0005515(protein binding);GO:0019901(protein kinase binding)	GO:0005737(cytoplasm);GO:0005856(cytoskeleton);GO:0030864(cortical actin cytoskeleton)	155.78	105.433	0.676806	-0.563185			155.78	102.816	0.660008	-0.599445
Mst1r	M200001494	ENSMUSG00000032584	NM_009074	19882	Mst1r	macrophage stimulating 1 receptor (c-met-related tyrosine kinase) [Source:MarkerSymbol;Acc:MGI:99614]	GO:0006468(protein amino acid phosphorylation);GO:0007275(multicellular organismal development)	GO:0000166(nucleotide binding);GO:0004672(protein kinase activity);GO:0004713(protein-tyrosine kinase activity);GO:0004872(receptor activity);GO:0005524(ATP binding);GO:0016301(kinase activity);GO:0016740(transferase activity)	GO:0001725(stress fiber);GO:0005615(extracellular space);GO:0005886(plasma membrane);GO:0016020(membrane);GO:0016021(integral to membrane)	3.50785	4.64373	1.32381	0.404695			3.50785	3.50461	0.999077	-0.00133257
Rnase1	M200001322	ENSMUSG00000035896	NM_011271	19752	Rnase1	ribonuclease, RNase A family, 1 (pancreatic) [Source:MarkerSymbol;Acc:MGI:97919]		GO:0003676(nucleic acid binding);GO:0004518(nuclease activity);GO:0004519(endonuclease activity);GO:0004522(pancreatic ribonuclease activity);GO:0016787(hydrolase activity)	GO:0005615(extracellular space)	2.79906	2.00898	0.717735	-0.478477			2.79906	0.829159	0.296228	-1.75522		*
Cfl2	M200001300									347.494	626.396	1.80261	0.850086			347.494	177.712	0.511409	-0.967449
Eif4e2	M200001152	ENSMUSG00000026254	NM_023314	0	Eif4e2	eukaryotic translation initiation factor 4E member 2 [Source:MarkerSymbol;Acc:MGI:1914440]	GO:0006412(translation);GO:0006413(translational initiation);GO:0006417(regulation of translation)	GO:0003723(RNA binding);GO:0003743(translation initiation factor activity);GO:0005515(protein binding)	GO:0005737(cytoplasm)	304.667	434.241	1.42529	0.51126			304.667	335.227	1.1003	0.137902
Myocd	M300002238	ENSMUSG00000020542	NM_145136;NM_146386	0	Myocd	myocardin [Source:MarkerSymbol;Acc:MGI:2137495]	GO:0001560(regulation of cell growth by extracellular stimulus);GO:0001570(vasculogenesis);GO:0006350(transcription);GO:0006355(regulation of transcription, DNA-dependent);GO:0006357(regulation of transcription from RNA polymerase II promoter);GO:0007507(heart development);GO:0008284(positive regulation of cell proliferation);GO:0042692(muscle cell differentiation);GO:0045661(regulation of myobla…	GO:0003676(nucleic acid binding);GO:0003677(DNA binding);GO:0003713(transcription coactivator activity);GO:0005515(protein binding);GO:0016563(transcriptional activator activity)	GO:0005634(nucleus)	2.12531	2.18276	1.02703	0.0384771			2.12531	0.789816	0.371624	-1.42809		*
Esrra	M200000975	ENSMUSG00000024955	NM_007953	0	Esrra	estrogen related receptor, alpha [Source:MarkerSymbol;Acc:MGI:1346831]	GO:0006350(transcription);GO:0006355(regulation of transcription, DNA-dependent);GO:0006810(transport)	GO:0003677(DNA binding);GO:0003700(transcription factor activity);GO:0003707(steroid hormone receptor activity);GO:0004872(receptor activity);GO:0004879(ligand-dependent nuclear receptor activity);GO:0005215(transporter activity);GO:0005496(steroid binding);GO:0005515(protein binding);GO:0008270(zinc ion binding);GO:0016439(tRNA-pseudouridine synthase activity);GO:0043565(sequence-specific DNA bi…	GO:0005634(nucleus);GO:0016020(membrane)	67.6433	59.6408	0.881695	-0.181649			67.6433	47.9294	0.70856	-0.497038
Cfc1	M200000952	ENSMUSG00000026124	NM_007685	12627	Cfc1	cripto, FRL-1, cryptic family 1 [Source:MarkerSymbol;Acc:MGI:109448]	GO:0007275(multicellular organismal development);GO:0007369(gastrulation)		GO:0005615(extracellular space)	15.2804	13.5606	0.887446	-0.172269			15.2804	11.1104	0.727102	-0.459771
Hnrpu	M200000805	ENSMUSG00000039630	NM_016805	51810	Hnrpu	heterogeneous nuclear ribonucleoprotein U [Source:MarkerSymbol;Acc:MGI:1858195]		GO:0003676(nucleic acid binding)	GO:0030529(ribonucleoprotein complex)	822.352	496.906	0.60425	-0.726782			822.352	708.593	0.861666	-0.214799
Cdadc1	M200000782	ENSMUSG00000021982	XM_127813	0	Cdadc1	cytidine and dCMP deaminase domain containing 1 [Source:MarkerSymbol;Acc:MGI:1919141]		GO:0008270(zinc ion binding);GO:0016301(kinase activity);GO:0016787(hydrolase activity)		85.8495	119.409	1.39091	0.47603			85.8495	95.6984	1.11472	0.156685
Snta1	M200000625	ENSMUSG00000027488	NM_009228	20648	Snta1	syntrophin, acidic 1 [Source:MarkerSymbol;Acc:MGI:101772]	GO:0007528(neuromuscular junction development)	GO:0003779(actin binding);GO:0005509(calcium ion binding);GO:0005515(protein binding);GO:0005516(calmodulin binding)	GO:0005856(cytoskeleton);GO:0016020(membrane);GO:0042383(sarcolemma);GO:0045211(postsynaptic membrane)	99.7914	105.767	1.05988	0.0839004			99.7914	55.4047	0.555205	-0.848907
Efna2	M200000603	ENSMUSG00000003070	NM_007909	13637	Efna2	ephrin A2 [Source:MarkerSymbol;Acc:MGI:102707]		GO:0005515(protein binding);GO:0048503(GPI anchor binding)	GO:0005615(extracellular space);GO:0016020(membrane)	22.5828	14.4045	0.637853	-0.648704			22.5828	6.66011	0.29492	-1.76161		*
Crybb2	M200000440	ENSMUSG00000042240	NM_007773	0	Crybb2	crystallin, beta B2 [Source:MarkerSymbol;Acc:MGI:88519]					2.79828						0.528521
Dpp4	M200000417	ENSMUSG00000035000	NM_010074	13482	Dpp4	dipeptidylpeptidase 4 [Source:MarkerSymbol;Acc:MGI:94919]	GO:0006508(proteolysis)	GO:0004177(aminopeptidase activity);GO:0004252(serine-type endopeptidase activity);GO:0004274(dipeptidyl-peptidase IV activity);GO:0004287(prolyl oligopeptidase activity);GO:0008233(peptidase activity);GO:0008236(serine-type peptidase activity);GO:0016787(hydrolase activity)	GO:0016020(membrane);GO:0016021(integral to membrane);GO:0046581(intercellular canaliculus)	2.89316	2.46422	0.851741	-0.231514			2.89316	1.25261	0.432954	-1.20771		*
Ly6e	M200000279	ENSMUSG00000022587	NM_008529	17069	Ly6e	lymphocyte antigen 6 complex, locus E [Source:MarkerSymbol;Acc:MGI:106651]	GO:0006952(defense response)	GO:0048503(GPI anchor binding)	GO:0005615(extracellular space);GO:0005886(plasma membrane);GO:0016020(membrane)	904.988	399.031	0.440924	-1.1814		*	904.988	447.116	0.494057	-1.01725		*
Tnnt1	M200000253	ENSMUSG00000064179	NM_011618	0	Tnnt1	troponin T1, skeletal, slow [Source:MarkerSymbol;Acc:MGI:1333868]	GO:0006937(regulation of muscle contraction)	GO:0005200(structural constituent of cytoskeleton);GO:0005515(protein binding)	GO:0005861(troponin complex)	81.1212	1241.38	15.3028	3.93572	***		81.1212	48.28	0.595158	-0.748654
Inmt	M200000107	ENSMUSG00000003477	NM_009349	21743	Inmt	indolethylamine N-methyltransferase [Source:MarkerSymbol;Acc:MGI:102963]				18.5404	18.2682	0.985316	-0.0213416			18.5404	16.3085	0.879618	-0.185051
Hyi	M300000797	ENSMUSG00000006395	NM_026601	68180	Hyi	hydroxypyruvate isomerase homolog (E. coli) [Source:MarkerSymbol;Acc:MGI:1915430]		GO:0016853(isomerase activity)		32.6665	30.776	0.942129	-0.0860033			32.6665	31.1148	0.9525	-0.0702092
Golga5	M200003982	ENSMUSG00000021192	NM_013747	27277	Golga5	golgi autoantigen, golgin subfamily a, 5 [Source:MarkerSymbol;Acc:MGI:1351475]	GO:0007030(Golgi organization and biogenesis);GO:0048193(Golgi vesicle transport)	GO:0005515(protein binding);GO:0017137(Rab GTPase binding);GO:0042803(protein homodimerization activity)	GO:0000139(Golgi membrane);GO:0005794(Golgi apparatus);GO:0005801(Golgi cis face);GO:0016020(membrane);GO:0016021(integral to membrane);GO:0031985(Golgi cisterna)	158.391	159.022	1.00398	0.0057345			158.391	159.611	1.0077	0.0110697
Epb4.1l1	M200003959	ENSMUSG00000027624	NM_001003815;NM_001006664;NM_013510	0	Epb4.1l1	erythrocyte protein band 4.1-like 1 [Source:MarkerSymbol;Acc:MGI:103010]	GO:0030866(cortical actin cytoskeleton organization and biogenesis)	GO:0003779(actin binding);GO:0005198(structural molecule activity);GO:0005515(protein binding);GO:0008092(cytoskeletal protein binding)	GO:0005737(cytoplasm);GO:0005856(cytoskeleton);GO:0016020(membrane)	122.602	61.0401	0.497872	-1.00615		*	122.602	48.1914	0.393072	-1.34713		*
Rgs19	M200003820	ENSMUSG00000002458	NM_026446	0	Rgs19	regulator of G-protein signaling 19 [Source:MarkerSymbol;Acc:MGI:1915153]	GO:0009968(negative regulation of signal transduction)	GO:0004871(signal transducer activity);GO:0005515(protein binding)	GO:0016020(membrane)	122.898	74.1618	0.603441	-0.728715			122.898	89.2052	0.725847	-0.462263
Fbxl15	M200003795	ENSMUSG00000025226	NM_133694	68431	Fbxl15	F-box and leucine-rich repeat protein 15 [Source:MarkerSymbol;Acc:MGI:1915681]	GO:0006512(ubiquitin cycle)			43.0659	38.2919	0.889147	-0.169507			43.0659	27.0997	0.629261	-0.66827
Acadvl	M200003653	ENSMUSG00000018574		13543	Acadvl	acyl-Coenzyme A dehydrogenase, very long chain [Source:MarkerSymbol;Acc:MGI:895149]	GO:0006118(electron transport);GO:0006629(lipid metabolic process);GO:0006631(fatty acid metabolic process);GO:0008152(metabolic process)	GO:0003995(acyl-CoA dehydrogenase activity);GO:0016491(oxidoreductase activity);GO:0016627(oxidoreductase activity, acting on the CH-CH group of donors);GO:0050660(FAD binding)	GO:0005739(mitochondrion)	615.523	617.175	1.00268	0.0038651			615.523	267.699	0.434913	-1.2012		*
Tbn	M200003623	ENSMUSG00000023980	NM_022015	63856	Tbn	taube nuss [Source:MarkerSymbol;Acc:MGI:1926879]	GO:0045598(regulation of fat cell differentiation);GO:0045893(positive regulation of transcription, DNA-dependent)	GO:0005515(protein binding);GO:0016563(transcriptional activator activity)	GO:0005634(nucleus);GO:0005669(transcription factor TFIID complex)	50.3191	35.4664	0.70483	-0.504652			50.3191	27.1119	0.538799	-0.892181
Chmp5	M200003481	ENSMUSG00000028419	NM_029814	76959	Chmp5	chromatin modifying protein 5 [Source:MarkerSymbol;Acc:MGI:1924209]	GO:0001919(regulation of receptor recycling);GO:0006810(transport);GO:0007040(lysosome organization and biogenesis);GO:0008333(endosome to lysosome transport);GO:0015031(protein transport)	GO:0003674(molecular_function)	GO:0005634(nucleus)	1127.32	1391.76	1.23458	0.304015			1127.32	557.622	0.494644	-1.01554		*
-	M200003450									14.4525	11.9314	0.825555	-0.276563			14.4525	11.9906	0.829652	-0.269421
Phc2	M200003288	ENSMUSG00000028796	NM_018774	0	Phc2	polyhomeotic-like 2 (Drosophila) [Source:MarkerSymbol;Acc:MGI:1860454]	GO:0007275(multicellular organismal development)	GO:0003677(DNA binding);GO:0005515(protein binding);GO:0008270(zinc ion binding);GO:0046872(metal ion binding)	GO:0005634(nucleus);GO:0031519(PcG protein complex)	243.662	146.241	0.600178	-0.736537			243.662	157.413	0.64603	-0.630326
Psmb8	M200003254	ENSMUSG00000024338	NM_010724	16913	Psmb8	proteosome (prosome, macropain) subunit, beta type 8 (large multifunctional peptidase 7) [Source:MarkerSymbol;Acc:MGI:1346527]	GO:0006511(ubiquitin-dependent protein catabolic process);GO:0006955(immune response);GO:0019882(antigen processing and presentation)	GO:0004175(endopeptidase activity);GO:0004298(threonine endopeptidase activity);GO:0005515(protein binding);GO:0008233(peptidase activity);GO:0016787(hydrolase activity)	GO:0005634(nucleus);GO:0005829(cytosol);GO:0005839(proteasome core complex (sensu Eukaryota));GO:0043234(protein complex)	8.54665	17.4878	2.04616	1.03292	*		8.54665	3.3103	0.387321	-1.3684		*
Serpinb11	M200003108	ENSMUSG00000026327	NM_025867	66957	Serpinb11	serine (or cysteine) peptidase inhibitor, clade B (ovalbumin), member 11 [Source:MarkerSymbol;Acc:MGI:1914207]		GO:0004866(endopeptidase inhibitor activity);GO:0004867(serine-type endopeptidase inhibitor activity)		2.977						2.977
Ap1s2	M200003086									122.381	121.011	0.98881	-0.0162343			122.381	34.8294	0.284598	-1.813		*
Rpl37	M200002933									7.46211	11.2673	1.50994	0.594486			7.46211	8.64736	1.15884	0.212675
Abhd5	M200002915	ENSMUSG00000032540	NM_026179	0	Abhd5	abhydrolase domain containing 5 [Source:MarkerSymbol;Acc:MGI:1914719]	GO:0006508(proteolysis);GO:0006629(lipid metabolic process);GO:0006725(aromatic compound metabolic process)	GO:0004177(aminopeptidase activity);GO:0005515(protein binding);GO:0016787(hydrolase activity)	GO:0005811(lipid particle);GO:0005829(cytosol)	103.607	96.6858	0.933197	-0.0997467			103.607	63.9781	0.617507	-0.695474
Hnrpl	M200002764	ENSMUSG00000015165	NM_177301	0	Hnrpl	heterogeneous nuclear ribonucleoprotein L [Source:MarkerSymbol;Acc:MGI:104816]	GO:0006396(RNA processing);GO:0006397(mRNA processing);GO:0008380(RNA splicing)	GO:0000166(nucleotide binding);GO:0003676(nucleic acid binding);GO:0003723(RNA binding)	GO:0005634(nucleus);GO:0030529(ribonucleoprotein complex);GO:0045120(pronucleus)	654.972	354.665	0.541496	-0.884976			654.972	275.23	0.420217	-1.25079		*
Fgf9	M200002744	ENSMUSG00000021974	NM_013518	14180	Fgf9	fibroblast growth factor 9 [Source:MarkerSymbol;Acc:MGI:104723]	GO:0000074(regulation of progression through cell cycle);GO:0001525(angiogenesis);GO:0002053(positive regulation of mesenchymal cell proliferation);GO:0006606(protein import into nucleus);GO:0007165(signal transduction);GO:0007267(cell-cell signaling);GO:0007275(multicellular organismal development);GO:0008283(cell proliferation);GO:0008284(positive regulation of cell proliferation);GO:0008543(fi…	GO:0005104(fibroblast growth factor receptor binding);GO:0008083(growth factor activity);GO:0008201(heparin binding)		4.14949	3.35452	0.808419	-0.306825			4.14949	0.957004	0.230632	-2.11634		**
Pabpn1	M200002589	ENSMUSG00000022198	NM_019402	54196	Pabpn1	poly(A) binding protein, nuclear 1 [Source:MarkerSymbol;Acc:MGI:1859158]	GO:0006378(mRNA polyadenylation);GO:0006397(mRNA processing)	GO:0000166(nucleotide binding);GO:0003676(nucleic acid binding);GO:0003723(RNA binding);GO:0005515(protein binding);GO:0008143(poly(A) binding)	GO:0005634(nucleus)	233.154	186.288	0.798992	-0.323746			233.154	181.639	0.779053	-0.360207
Mr1	M200002572	ENSMUSG00000026471	NM_008209	15064	Mr1	major histocompatibility complex, class I-related [Source:MarkerSymbol;Acc:MGI:1195463]				35.7658	39.6761	1.10933	0.149689			35.7658	16.8976	0.47245	-1.08177		*
Fhl2	M200002429	ENSMUSG00000008136	NM_010212	14200	Fhl2	four and a half LIM domains 2 [Source:MarkerSymbol;Acc:MGI:1338762]	GO:0006357(regulation of transcription from RNA polymerase II promoter)	GO:0005515(protein binding);GO:0008270(zinc ion binding);GO:0046872(metal ion binding)	GO:0005634(nucleus)	504.205	656.482	1.30201	0.380744			504.205	511.167	1.01381	0.0197832
Ptpn9	M200002410	ENSMUSG00000032290	NM_019651	56294	Ptpn9	protein tyrosine phosphatase, non-receptor type 9 [Source:MarkerSymbol;Acc:MGI:1928376]	GO:0006470(protein amino acid dephosphorylation);GO:0006810(transport);GO:0016311(dephosphorylation)	GO:0004721(phosphoprotein phosphatase activity);GO:0004725(protein tyrosine phosphatase activity);GO:0004726(non-membrane spanning protein tyrosine phosphatase activity);GO:0004727(prenylated protein tyrosine phosphatase activity);GO:0005215(transporter activity);GO:0016787(hydrolase activity);GO:0016791(phosphoric monoester hydrolase activity)	GO:0005622(intracellular)	210.877	146.627	0.69532	-0.524251			210.877	93.3818	0.442826	-1.17519		*
Chaf1b	M200002257	ENSMUSG00000022945	NM_028083	0	Chaf1b	chromatin assembly factor 1, subunit B (p60) [Source:MarkerSymbol;Acc:MGI:1314881]				118.661	50.6181	0.426576	-1.22912		*	118.661	97.8454	0.824577	-0.278274
-	M200002234									124.806	156.667	1.25528	0.328009			124.806	95.9676	0.768931	-0.379074
Tpo	M200002077	ENSMUSG00000020673	NM_009417	22018	Tpo	thyroid peroxidase [Source:MarkerSymbol;Acc:MGI:98813]	GO:0006979(response to oxidative stress);GO:0042446(hormone biosynthetic process);GO:0042744(hydrogen peroxide catabolic process)	GO:0004447(iodide peroxidase activity);GO:0004601(peroxidase activity);GO:0005506(iron ion binding);GO:0005509(calcium ion binding);GO:0016491(oxidoreductase activity);GO:0046872(metal ion binding)	GO:0016020(membrane);GO:0016021(integral to membrane)	4.78283	2.0121	0.420692	-1.24916		*	4.78283	1.15239	0.240944	-2.05323		**
G630055P03Rik	M200005941									284.69	169.847	0.596603	-0.745157			284.69	251.41	0.883102	-0.179348
9030623C06Rik	M200005808									3.80907	2.913	0.764752	-0.386936			3.80907	1.16567	0.306025	-1.70828		*
Rfc5	M200005784	ENSMUSG00000029363	XM_132348	72151	Rfc5	replication factor C (activator 1) 5 [Source:MarkerSymbol;Acc:MGI:1919401]	GO:0006260(DNA replication);GO:0006281(DNA repair)	GO:0000166(nucleotide binding);GO:0005524(ATP binding);GO:0017111(nucleoside-triphosphatase activity)	GO:0005634(nucleus)	221.168	76.1743	0.344418	-1.53777		*	221.168	130.2	0.588695	-0.764408
1700003M02Rik	M200005641	ENSMUSG00000028294	NM_027041	69329	1700003M02Rik	RIKEN cDNA 1700003M02 gene [Source:MarkerSymbol;Acc:MGI:1916579]				5.21348	1.89716	0.363895	-1.45841		*	5.21348	0.521345	0.0999995	-3.32193		***
Dbnl	M200005628	ENSMUSG00000020476	NM_013810	0	Dbnl	drebrin-like [Source:MarkerSymbol;Acc:MGI:700006]	GO:0006897(endocytosis);GO:0006955(immune response);GO:0016601(Rac protein signal transduction);GO:0051014(actin filament severing);GO:0051016(barbed-end actin filament capping);GO:0051017(actin filament bundle formation)	GO:0003779(actin binding);GO:0005515(protein binding);GO:0051015(actin filament binding)	GO:0001726(ruffle);GO:0005622(intracellular);GO:0005737(cytoplasm);GO:0005856(cytoskeleton);GO:0005938(cell cortex);GO:0030027(lamellipodium)	195.885	166.994	0.852514	-0.230205			195.885	112.855	0.576128	-0.795538
2010001M09Rik	M200005480	ENSMUSG00000024353	NM_027222	69816	2010001M09Rik	RIKEN cDNA 2010001M09 gene [Source:MarkerSymbol;Acc:MGI:1917066]			GO:0005615(extracellular space);GO:0005783(endoplasmic reticulum)	11.937	6.99933	0.586355	-0.770154			11.937	8.67185	0.726467	-0.461031
Tmem38b	M200005453	ENSMUSG00000028420	NM_028053	52076	Tmem38b	transmembrane protein 38B [Source:MarkerSymbol;Acc:MGI:1098718]	GO:0006334(nucleosome assembly);GO:0007001(chromosome organization and biogenesis (sensu Eukaryota))	GO:0003677(DNA binding)	GO:0000786(nucleosome);GO:0005634(nucleus);GO:0016021(integral to membrane)	61.6664	133.115	2.15863	1.11012	*		61.6664	43.5894	0.706858	-0.500508
Itga2b	M200005317	ENSMUSG00000034664	NM_010575	16399	Itga2b	integrin alpha 2b [Source:MarkerSymbol;Acc:MGI:96601]	GO:0006508(proteolysis);GO:0007155(cell adhesion);GO:0007160(cell-matrix adhesion);GO:0007229(integrin-mediated signaling pathway)	GO:0004182(carboxypeptidase A activity);GO:0004872(receptor activity);GO:0005509(calcium ion binding);GO:0005515(protein binding);GO:0042802(identical protein binding);GO:0050840(extracellular matrix binding)	GO:0005925(focal adhesion);GO:0008305(integrin complex);GO:0009897(external side of plasma membrane);GO:0016020(membrane);GO:0016021(integral to membrane)	4.25613	4.08312	0.959352	-0.0598679			4.25613	0.483072	0.1135	-3.13923		***
Pfkm	M200005294	ENSMUSG00000033065	NM_021514	18642	Pfkm	phosphofructokinase, muscle [Source:MarkerSymbol;Acc:MGI:97548]	GO:0006096(glycolysis);GO:0006110(regulation of glycolysis)	GO:0000166(nucleotide binding);GO:0000287(magnesium ion binding);GO:0003824(catalytic activity);GO:0003872(6(phosphofructokinase activity);GO:0005524(ATP binding);GO:0008022(protein C-terminus binding);GO:0008443(phosphofructokinase activity);GO:0016301(kinase activity);GO:0016740(transferase activity);GO:0046872(metal ion binding)	GO:0005737(cytoplasm);GO:0005945(6(phosphofructokinase complex)	121.509	275.954	2.27105	1.18336	*		121.509	63.7213	0.524416	-0.931218
Gng11	M200005139	ENSMUSG00000032766	NM_025331	66066	Gng11	guanine nucleotide binding protein (G protein), gamma 11 [Source:MarkerSymbol;Acc:MGI:1913316]	GO:0007165(signal transduction);GO:0007186(G-protein coupled receptor protein signaling pathway)	GO:0003924(GTPase activity);GO:0004871(signal transducer activity)	GO:0005834(heterotrimeric G-protein complex);GO:0016020(membrane)	101.027	134.32	1.32954	0.410927			101.027	15.4954	0.153378	-2.70484		**
Arc	M200005121	ENSMUSG00000022602	NM_018790	11838	Arc	activity regulated cytoskeletal-associated protein [Source:MarkerSymbol;Acc:MGI:88067]	GO:0006897(endocytosis);GO:0007275(multicellular organismal development);GO:0007492(endoderm development);GO:0009952(anterior/posterior pattern formation)	GO:0003779(actin binding)	GO:0005856(cytoskeleton)	13.3931	9.0173	0.673281	-0.570718			13.3931	3.02798	0.226085	-2.14506		**
Lrrc40	M200004982	ENSMUSG00000063052	NM_024194	67144	Lrrc40	leucine rich repeat containing 40 [Source:MarkerSymbol;Acc:MGI:1914394]				84.5825	42.4289	0.501627	-0.995312			84.5825	69.9324	0.826795	-0.274399
Cetn2	M200004962	ENSMUSG00000031347	NM_019405	0	Cetn2	centrin 2 [Source:MarkerSymbol;Acc:MGI:1347085]	GO:0007049(cell cycle);GO:0007067(mitosis);GO:0051301(cell division)	GO:0003676(nucleic acid binding);GO:0005509(calcium ion binding);GO:0005515(protein binding);GO:0005524(ATP binding);GO:0008026(ATP-dependent helicase activity)	GO:0005622(intracellular);GO:0005814(centriole)	301.898	440.76	1.45996	0.545931			301.898	183.748	0.608642	-0.716334
Msh5	M200004819	ENSMUSG00000007035	NM_013600	17687	Msh5	mutS homolog 5 (E. coli) [Source:MarkerSymbol;Acc:MGI:1329021]	GO:0006259(DNA metabolic process);GO:0006298(mismatch repair);GO:0007126(meiosis);GO:0007127(meiosis I);GO:0007129(synapsis);GO:0007292(female gamete generation)	GO:0000166(nucleotide binding);GO:0003677(DNA binding);GO:0005524(ATP binding);GO:0030983(mismatched DNA binding)	GO:0000795(synaptonemal complex)	34.5455	27.1737	0.786607	-0.346286			34.5455	27.413	0.793534	-0.333636
Rtn2	M200004804	ENSMUSG00000030401	NM_013648	20167	Rtn2	reticulon 2 (Z-band associated protein) [Source:MarkerSymbol;Acc:MGI:107612]		GO:0003674(molecular_function)	GO:0005783(endoplasmic reticulum);GO:0016020(membrane);GO:0016021(integral to membrane)	262.968	742.447	2.82333	1.4974	*		262.968	96.8331	0.368231	-1.44132		*
1810074P20Rik	M200004641	ENSMUSG00000040359	NM_026194	67490	1810074P20Rik	RIKEN cDNA 1810074P20 gene [Source:MarkerSymbol;Acc:MGI:1914740]				85.7653	70.5734	0.822866	-0.28127			85.7653	56.2872	0.656293	-0.607587
1500016O10Rik	M200004622	ENSMUSG00000058966	XM_133706	68952	1500016O10Rik	RIKEN cDNA 1500016O10 gene [Source:MarkerSymbol;Acc:MGI:1916202]			GO:0005783(endoplasmic reticulum);GO:0016020(membrane);GO:0016021(integral to membrane)	12.1284	10.8668	0.895978	-0.158465			12.1284	6.20663	0.511745	-0.966504
Sqle	M200004466	ENSMUSG00000022351	NM_009270	20775	Sqle	squalene epoxidase [Source:MarkerSymbol;Acc:MGI:109296]	GO:0006118(electron transport);GO:0008152(metabolic process)	GO:0004506(squalene monooxygenase activity);GO:0016491(oxidoreductase activity)	GO:0005615(extracellular space);GO:0016020(membrane);GO:0016021(integral to membrane)	1172.06	934.467	0.797286	-0.326831			1172.06	1088.03	0.928309	-0.107323
Tsta3	M200004442	ENSMUSG00000022570	NM_031201	22122	Tsta3	tissue specific transplantation antigen P35B [Source:MarkerSymbol;Acc:MGI:98857]	GO:0044237(cellular metabolic process)	GO:0003824(catalytic activity);GO:0016491(oxidoreductase activity);GO:0016853(isomerase activity);GO:0050577(GDP-L-fucose synthase activity);GO:0050662(coenzyme binding)		562.018	499.534	0.888822	-0.170033			562.018	511.05	0.909312	-0.137153
D18Ertd653e	M200004298	ENSMUSG00000024544	NM_172631	52662	D18Ertd653e	Uncharacterized protein C18orf1 homolog. [Source:Uniprot/SWISSPROT;Acc:Q8BWJ4]			GO:0016020(membrane);GO:0016021(integral to membrane)	55.1221	54.655	0.991526	-0.0122776			55.1221	49.2225	0.892972	-0.163313
Cpeb1	M200004280	ENSMUSG00000025586	NM_007755	0	Cpeb1	cytoplasmic polyadenylation element binding protein 1 [Source:MarkerSymbol;Acc:MGI:108442]				23.482	35.9809	1.53228	0.615676			23.482	80.6026	3.43253	1.77927	*
Dhrs7b	M200004137	ENSMUSG00000042569	NM_145428	0	Dhrs7b	dehydrogenase/reductase (SDR family) member 7B [Source:MarkerSymbol;Acc:MGI:2384931]	GO:0008152(metabolic process)	GO:0016491(oxidoreductase activity);GO:0016740(transferase activity)		204.51	176.237	0.861751	-0.214658			204.51	183.844	0.898947	-0.153692
-	M200004119									299.332	235.812	0.787795	-0.344107			299.332	304.485	1.01722	0.0246258
Slc25a35	M200007812	ENSMUSG00000018740	NM_028048	0	Slc25a35	solute carrier family 25, member 35 [Source:MarkerSymbol;Acc:MGI:1919248]	GO:0006810(transport)	GO:0005215(transporter activity);GO:0005488(binding)	GO:0005743(mitochondrial inner membrane);GO:0016020(membrane);GO:0016021(integral to membrane)	17.0802	15.7432	0.921721	-0.117598			17.0802	9.08251	0.531757	-0.911162
Leprel2	M200007795	ENSMUSG00000023191	NM_013534	14789	Leprel2	leprecan-like 2 [Source:MarkerSymbol;Acc:MGI:1315208]	GO:0019538(protein metabolic process)	GO:0005488(binding);GO:0005506(iron ion binding);GO:0016491(oxidoreductase activity);GO:0016702(oxidoreductase activity, acting on single donors with incorporation of molecular oxygen, incorporation of two atoms of oxygen);GO:0016706(oxidoreductase activity, acting on paired donors, with incorporation or reduction of molecular oxygen, 2(oxoglutarate as one don);GO:0019797(procollagen-proline 3(di…	GO:0005783(endoplasmic reticulum)	22.4426	31.4427	1.40103	0.486483			22.4426	9.14231	0.407364	-1.29561		*
4933425L03Rik	M200007646	ENSMUSG00000020576		0	4933425L03Rik	RIKEN cDNA 4933425L03 gene [Source:MarkerSymbol;Acc:MGI:1918419]				4.03773	1.78822	0.442878	-1.17502		*	4.03773	2.39296	0.59265	-0.754747
Zfp312	M200007626									14.6295	8.06794	0.551485	-0.858607			14.6295	6.43419	0.43981	-1.18505		*
Riok2	M200007487	ENSMUSG00000023846	NM_025934	67045	Riok2	RIO kinase 2 (yeast) [Source:MarkerSymbol;Acc:MGI:1914295]	GO:0006468(protein amino acid phosphorylation)	GO:0000166(nucleotide binding);GO:0004672(protein kinase activity);GO:0004674(protein serine/threonine kinase activity);GO:0005524(ATP binding);GO:0016301(kinase activity);GO:0016740(transferase activity)		28.7276	15.859	0.552049	-0.857131			28.7276	72.3668	2.51907	1.33289	*
Rab7l1	M200007464	ENSMUSG00000026433	NM_144875	226422	Rab7l1	RAB7, member RAS oncogene family-like 1 [Source:MarkerSymbol;Acc:MGI:2385107]	GO:0006810(transport);GO:0007264(small GTPase mediated signal transduction);GO:0015031(protein transport)	GO:0000166(nucleotide binding);GO:0005515(protein binding);GO:0005525(GTP binding)	GO:0016020(membrane)	43.2335	39.8623	0.922023	-0.117125			43.2335	25.8657	0.598279	-0.741109
Slc41a3	M200007299	ENSMUSG00000030089	XM_132686	71699	Slc41a3	solute carrier family 41, member 3 [Source:MarkerSymbol;Acc:MGI:1918949]	GO:0006812(cation transport)	GO:0004601(peroxidase activity);GO:0005515(protein binding);GO:0008324(cation transporter activity)	GO:0016021(integral to membrane)	26.6102	35.8122	1.34581	0.428471			26.6102	25.43	0.955649	-0.0654465
4930556P03Rik	M200007272	ENSMUSG00000037525	NM_029236	75284	4930556P03Rik	RIKEN cDNA 4930556P03 gene [Source:MarkerSymbol;Acc:MGI:1922534]		GO:0016740(transferase activity)		56.0368	48.4952	0.865418	-0.208531			56.0368	40.0612	0.714908	-0.48417
Rab32	M200007106	ENSMUSG00000019832	NM_026405	67844	Rab32	RAB32, member RAS oncogene family [Source:MarkerSymbol;Acc:MGI:1915094]	GO:0006468(protein amino acid phosphorylation);GO:0006886(intracellular protein transport);GO:0007264(small GTPase mediated signal transduction);GO:0015031(protein transport)	GO:0000166(nucleotide binding);GO:0004672(protein kinase activity);GO:0005524(ATP binding);GO:0005525(GTP binding)	GO:0005739(mitochondrion)	92.0948	95.0571	1.03217	0.0456739			92.0948	39.7225	0.431322	-1.21316		*
1200013B08Rik	M200007087	ENSMUSG00000031101	NM_028773	74131	1200013B08Rik	RIKEN cDNA 1200013B08 gene [Source:MarkerSymbol;Acc:MGI:1921381]				3.8142	3.58254	0.939263	-0.0903988			3.8142	0.951967	0.249585	-2.0024		**
Sntb2	M200006908	ENSMUSG00000041308	NM_009229	100047790	Sntb2	syntrophin, basic 2 [Source:MarkerSymbol;Acc:MGI:101771]				35.7854	25.6086	0.715615	-0.482744			35.7854	20.4715	0.572062	-0.805756
Snap23	M200006889	ENSMUSG00000027287	NM_009222	0	Snap23	synaptosomal-associated protein 23 [Source:MarkerSymbol;Acc:MGI:109356]	GO:0006810(transport);GO:0006886(intracellular protein transport);GO:0006892(post-Golgi vesicle-mediated transport);GO:0006903(vesicle targeting);GO:0006944(membrane fusion);GO:0007033(vacuole organization and biogenesis);GO:0015031(protein transport)	GO:0005486(t-SNARE activity);GO:0005515(protein binding);GO:0008565(protein transporter activity)	GO:0005792(microsome);GO:0005886(plasma membrane);GO:0016020(membrane);GO:0019717(synaptosome);GO:0030133(transport vesicle);GO:0045202(synapse)	165.707	176.922	1.06768	0.0944758			165.707	111.188	0.670993	-0.575631
Ndufa9	M200006740	ENSMUSG00000000399	NM_025358	66108	Ndufa9	NADH dehydrogenase (ubiquinone) 1 alpha subcomplex, 9 [Source:MarkerSymbol;Acc:MGI:1913358]	GO:0044237(cellular metabolic process)	GO:0003824(catalytic activity);GO:0003954(NADH dehydrogenase activity);GO:0008137(NADH dehydrogenase (ubiquinone) activity);GO:0016491(oxidoreductase activity);GO:0050662(coenzyme binding)	GO:0005615(extracellular space);GO:0005739(mitochondrion);GO:0005743(mitochondrial inner membrane)	624.621	674.271	1.07949	0.110348			624.621	507.162	0.811951	-0.300535
Tsfm	M200006718	ENSMUSG00000040521	NM_025537	66399	Tsfm	Ts translation elongation factor, mitochondrial [Source:MarkerSymbol;Acc:MGI:1913649]	GO:0006412(translation);GO:0006414(translational elongation)	GO:0003746(translation elongation factor activity)	GO:0005622(intracellular);GO:0005739(mitochondrion)	503.038	353.527	0.702783	-0.508849			503.038	150.521	0.299224	-1.7407		*
4921520P21Rik	M200006595									4.30781	4.19302	0.973353	-0.0389644			4.30781	1.52108	0.353097	-1.50186		*
2610028A01Rik	M200006579	ENSMUSG00000021958	NM_028228	72400	2610028A01Rik	RIKEN cDNA 2610028A01 gene [Source:MarkerSymbol;Acc:MGI:1919650]	GO:0007004(telomere maintenance via telomerase);GO:0007049(cell cycle);GO:0045786(negative regulation of progression through cell cycle)	GO:0003676(nucleic acid binding);GO:0005515(protein binding)	GO:0000781(chromosome, telomeric region);GO:0005622(intracellular);GO:0005634(nucleus);GO:0005694(chromosome);GO:0005730(nucleolus)	77.6866	65.2436	0.839831	-0.25183			77.6866	73.8757	0.950945	-0.0725654
Anks3	M200006434	ENSMUSG00000022515	NM_028301	72615	Anks3	ankyrin repeat and sterile alpha motif domain containing 3 [Source:MarkerSymbol;Acc:MGI:1919865]	GO:0006355(regulation of transcription, DNA-dependent)	GO:0003677(DNA binding);GO:0003700(transcription factor activity)		46.5099	61.65	1.32553	0.406565			46.5099	44.365	0.953884	-0.068114
Ybx2	M200006416	ENSMUSG00000018554	NM_016875	0	Ybx2	Y box protein 2 [Source:MarkerSymbol;Acc:MGI:1096372]	GO:0006118(electron transport);GO:0006350(transcription);GO:0006355(regulation of transcription, DNA-dependent);GO:0007286(spermatid development);GO:0017148(negative regulation of protein biosynthetic process);GO:0048157(oogenesis (sensu Mammalia))	GO:0003676(nucleic acid binding);GO:0003677(DNA binding);GO:0003682(chromatin binding);GO:0003723(RNA binding);GO:0003729(mRNA binding);GO:0008121(ubiquinol-cytochrome-c reductase activity);GO:0008289(lipid binding);GO:0045182(translation regulator activity)	GO:0005634(nucleus);GO:0005737(cytoplasm);GO:0016020(membrane);GO:0030529(ribonucleoprotein complex);GO:0045285(ubiquinol-cytochrome-c reductase complex)	2.93972	1.44934	0.493021	-1.02028		*	2.93972	1.4541	0.494639	-1.01555		*
D3Ertd751e	M200006273									4.14436	3.58203	0.864313	-0.210374			4.14436	0.78264	0.188845	-2.40473		**
Ilkap	M200006253	ENSMUSG00000026309	NM_023343	67444	Ilkap	integrin-linked kinase-associated serine/threonine phosphatase 2C [Source:MarkerSymbol;Acc:MGI:1914694]	GO:0006470(protein amino acid dephosphorylation)	GO:0000287(magnesium ion binding);GO:0003824(catalytic activity);GO:0004721(phosphoprotein phosphatase activity);GO:0004722(protein serine/threonine phosphatase activity);GO:0016787(hydrolase activity);GO:0030145(manganese ion binding);GO:0046872(metal ion binding)	GO:0008287(protein serine/threonine phosphatase complex)	279.835	354.665	1.26741	0.341881			279.835	191.378	0.683897	-0.548149
Osgepl1	M200006121	ENSMUSG00000026096	NM_028091	0	Osgepl1	O-sialoglycoprotein endopeptidase-like 1 [Source:MarkerSymbol;Acc:MGI:1919335]	GO:0006508(proteolysis)	GO:0004175(endopeptidase activity);GO:0008233(peptidase activity);GO:0008270(zinc ion binding);GO:0008450(O-sialoglycoprotein endopeptidase activity)		88.9573	76.0126	0.854484	-0.226875			88.9573	82.5699	0.928197	-0.107498
Slc16a3	M200006101	ENSMUSG00000025161	NM_030696	80879	Slc16a3	solute carrier family 16 (monocarboxylic acid transporters), member 3 [Source:MarkerSymbol;Acc:MGI:1933438]	GO:0006810(transport);GO:0015711(organic anion transport)	GO:0005215(transporter activity);GO:0015293(symporter activity);GO:0015355(monocarboxylate porter activity)	GO:0016020(membrane);GO:0016021(integral to membrane)	107.967	83.6289	0.774581	-0.368512			107.967	24.5427	0.227318	-2.13722		**
Ide	M200005967	ENSMUSG00000056999	NM_031156	15925	Ide	insulin degrading enzyme [Source:MarkerSymbol;Acc:MGI:96412]	GO:0006508(proteolysis)	GO:0004222(metalloendopeptidase activity);GO:0004231(insulysin activity);GO:0008233(peptidase activity);GO:0008237(metallopeptidase activity);GO:0008270(zinc ion binding);GO:0016787(hydrolase activity);GO:0046872(metal ion binding)	GO:0005615(extracellular space)	308.826	203.076	0.657576	-0.604771			308.826	284.972	0.92276	-0.115973
1700126L10Rik	M200010632	ENSMUSG00000017720	XM_355364	0	1700126L10Rik	RIKEN cDNA 1700126L10 gene [Source:MarkerSymbol;Acc:MGI:1920853]				2.95226						2.95226	0.84351	0.285717	-1.80734		*
1110006G14Rik	M200010053	ENSMUSG00000030664	XM_485989	68469	1110006G14Rik	RIKEN cDNA 1110006G14 gene [Source:MarkerSymbol;Acc:MGI:1915719]				4.52524						4.52524
-	M400000092									35.4244	52.1242	1.47142	0.557207			35.4244	17.6589	0.498494	-1.00435		*
Klra17	M200009820	ENSMUSG00000014543	NM_133203	0	Klra17	killer cell lectin-like receptor, subfamily A, member 17 [Source:MarkerSymbol;Acc:MGI:2180674]		GO:0004872(receptor activity);GO:0005529(sugar binding)	GO:0016021(integral to membrane)	5.40582	3.91705	0.724599	-0.464744			5.40582	1.56759	0.289983	-1.78596		*
Calb2	M400000077	ENSMUSG00000003657	NM_007586	12308	Calb2	calbindin 2 [Source:MarkerSymbol;Acc:MGI:101914]		GO:0005509(calcium ion binding)	GO:0005921(gap junction)	15.2268	11.5913	0.76124	-0.393577			15.2268	9.17662	0.602661	-0.730582
Rbp3	M200009623	ENSMUSG00000041534	NM_015745	19661	Rbp3	retinol binding protein 3, interstitial [Source:MarkerSymbol;Acc:MGI:97878]	GO:0006508(proteolysis);GO:0006629(lipid metabolic process);GO:0006810(transport);GO:0007601(visual perception)	GO:0005501(retinoid binding);GO:0005504(fatty acid binding);GO:0008233(peptidase activity);GO:0008236(serine-type peptidase activity);GO:0016918(retinal binding)	GO:0005578(proteinaceous extracellular matrix);GO:0005615(extracellular space)	25.6449	19.559	0.762687	-0.390836			25.6449	17.3261	0.675614	-0.565729
4930424G05Rik	M200009598	ENSMUSG00000027233	NM_026251	67578	4930424G05Rik	RIKEN cDNA 4930424G05 gene [Source:MarkerSymbol;Acc:MGI:1914828]				3.83797	5.26022	1.37057	0.454778			3.83797	1.62953	0.424582	-1.23588		*
D15Ertd785e	M200009432									146.073	106.396	0.728378	-0.457241			146.073	61.6474	0.422032	-1.24458		*
Prg2	M200009412	ENSMUSG00000027073	NM_008920	19074	Prg2	proteoglycan 2, bone marrow [Source:MarkerSymbol;Acc:MGI:103294]				8.55085	9.6369	1.12701	0.172502			8.55085	0.944792	0.110491	-3.178		***
BC003266	M200009268	ENSMUSG00000042380	NM_030252	80284	BC003266	cDNA sequence BC003266 [Source:MarkerSymbol;Acc:MGI:1933141]			GO:0005615(extracellular space)	120.798	150.949	1.2496	0.321468			120.798	66.9853	0.554525	-0.850675
Hnrpd	M400000017									5.65214	4.64084	0.821077	-0.284411			5.65214
Bmper	M200008990	ENSMUSG00000031963	NM_028472	73230	Bmper	BMP-binding endothelial regulator [Source:MarkerSymbol;Acc:MGI:1920480]	GO:0030514(negative regulation of BMP signaling pathway)	GO:0005515(protein binding)	GO:0005576(extracellular region)	32.2544	42.7039	1.32397	0.404871			32.2544	19.9303	0.617908	-0.694537
B3galt2	M200008954	ENSMUSG00000033849	NM_020025	26878	B3galt2	UDP-Gal:betaGlcNAc beta 1,3-galactosyltransferase, polypeptide 2 [Source:MarkerSymbol;Acc:MGI:1349461]	GO:0006486(protein amino acid glycosylation);GO:0009312(oligosaccharide biosynthetic process)	GO:0008378(galactosyltransferase activity);GO:0008499(UDP-galactose:beta-N-acetylglucosamine beta-1,3(galactosyltransferase activity);GO:0016740(transferase activity);GO:0016757(transferase activity, transferring glycosyl groups);GO:0030145(manganese ion binding)	GO:0016020(membrane);GO:0016021(integral to membrane)	3.57301	4.31374	1.20731	0.2718			3.57301	0.435483	0.121881	-3.03645		***
Cryzl1	M200008769	ENSMUSG00000058240	NM_133679	0	Cryzl1	crystallin, zeta (quinone reductase)-like 1 [Source:MarkerSymbol;Acc:MGI:1913859]		GO:0008270(zinc ion binding);GO:0016491(oxidoreductase activity)		133.557	129.761	0.971578	-0.0415988			133.557	133.127	0.996781	-0.00465103
1700006E09Rik	M200008737	ENSMUSG00000010841	XM_126493	75437	1700006E09Rik	RIKEN cDNA 1700006E09 gene [Source:MarkerSymbol;Acc:MGI:1922687]				9.9655	7.44663	0.747241	-0.420354			9.9655	10.2224	1.02578	0.0367155
Lats1	M200008559	ENSMUSG00000040021		16798	Lats1	large tumor suppressor [Source:MarkerSymbol;Acc:MGI:1333883]	GO:0000086(G2/M transition of mitotic cell cycle);GO:0000819(sister chromatid segregation);GO:0006468(protein amino acid phosphorylation);GO:0007049(cell cycle);GO:0007067(mitosis);GO:0009755(hormone-mediated signaling);GO:0030833(regulation of actin filament polymerization);GO:0045736(negative regulation of cyclin-dependent protein kinase activity);GO:0045786(negative regulation of progression t…	GO:0000166(nucleotide binding);GO:0000287(magnesium ion binding);GO:0004672(protein kinase activity);GO:0004674(protein serine/threonine kinase activity);GO:0004713(protein-tyrosine kinase activity);GO:0005524(ATP binding);GO:0016301(kinase activity);GO:0016740(transferase activity);GO:0046872(metal ion binding)	GO:0000922(spindle pole)	30.8397	20.2267	0.655864	-0.608532			30.8397	26.7232	0.86652	-0.206696
B230343H07Rik	M300021438									7.39183	6.72455	0.909727	-0.136494			7.39183	5.47751	0.741022	-0.432411
Gckr	M200008361	ENSMUSG00000059434	NM_144909	231103	Gckr	glucokinase regulatory protein [Source:MarkerSymbol;Acc:MGI:1096345]	GO:0000060(protein import into nucleus, translocation);GO:0001678(cell glucose homeostasis);GO:0005975(carbohydrate metabolic process)	GO:0005515(protein binding);GO:0005529(sugar binding);GO:0030234(enzyme regulator activity)	GO:0005634(nucleus)	14.311	17.6503	1.23334	0.30257			14.311	10.41	0.727415	-0.45915
Taf9b	M300018095	ENSMUSG00000047242	NM_001001176	0	Taf9b	TAF9B RNA polymerase II, TATA box binding protein (TBP)-associated factor [Source:MarkerSymbol;Acc:MGI:3039562]	GO:0006350(transcription);GO:0006352(transcription initiation);GO:0006355(regulation of transcription, DNA-dependent)		GO:0005634(nucleus);GO:0005669(transcription factor TFIID complex)	11.611	10.1418	0.873465	-0.195178			11.611	5.29383	0.455931	-1.13311		*
Adss	M200008158	ENSMUSG00000015961	NM_007422	11566	Adss	adenylosuccinate synthetase, non muscle [Source:MarkerSymbol;Acc:MGI:87948]	GO:0006164(purine nucleotide biosynthetic process)	GO:0000166(nucleotide binding);GO:0000287(magnesium ion binding);GO:0004019(adenylosuccinate synthase activity);GO:0005525(GTP binding);GO:0016874(ligase activity);GO:0046872(metal ion binding)		434.723	197.765	0.454921	-1.13631		*	434.723	321.407	0.739337	-0.435696
Rab17	M200008134	ENSMUSG00000026304	NM_008998	19329	Rab17	RAB17, member RAS oncogene family [Source:MarkerSymbol;Acc:MGI:104640]	GO:0006810(transport);GO:0007264(small GTPase mediated signal transduction);GO:0015031(protein transport)	GO:0000166(nucleotide binding);GO:0005525(GTP binding)	GO:0005622(intracellular);GO:0016020(membrane)	5.95341	4.98855	0.837932	-0.255095			5.95341	2.88074	0.483881	-1.04727		*
Spon1	M200007988	ENSMUSG00000038156	NM_145584	233744	Spon1	spondin 1, (f-spondin) extracellular matrix protein [Source:MarkerSymbol;Acc:MGI:2385287]	GO:0007155(cell adhesion);GO:0007275(multicellular organismal development)	GO:0005515(protein binding)	GO:0005578(proteinaceous extracellular matrix);GO:0005615(extracellular space)	4.82841	1.95474	0.404842	-1.30457		*	4.82841	1.40041	0.290035	-1.7857		*
4930426D05Rik	M200007962									18.3738	18.3781	1.00024	0.000339245			18.3738	10.3752	0.564675	-0.824508
Slc22a4	M200013911	ENSMUSG00000020334	NM_019687	30805	Slc22a4	solute carrier family 22 (organic cation transporter), member 4 [Source:MarkerSymbol;Acc:MGI:1353479]	GO:0006810(transport);GO:0006811(ion transport);GO:0006814(sodium ion transport)	GO:0000166(nucleotide binding);GO:0005215(transporter activity);GO:0005524(ATP binding);GO:0015075(ion transporter activity);GO:0015293(symporter activity);GO:0031402(sodium ion binding)	GO:0005739(mitochondrion);GO:0016020(membrane);GO:0016021(integral to membrane)	37.8096	21.8064	0.576743	-0.793999			37.8096	0.429377	0.0113563	-6.46036		***
Cdc34	M400000378	ENSMUSG00000020307	NM_177613	100046898	Cdc34	cell division cycle 34 homolog (S. cerevisiae) [Source:MarkerSymbol;Acc:MGI:102657]	GO:0006464(protein modification);GO:0006512(ubiquitin cycle)	GO:0004842(ubiquitin-protein ligase activity);GO:0016874(ligase activity);GO:0019787(small conjugating protein ligase activity)		512.937	452.6	0.88237	-0.180544			512.937	513.829	1.00174	0.00250781
Dapk2	M200013731	ENSMUSG00000032380	NM_010019	13143	Dapk2	death-associated kinase 2 [Source:MarkerSymbol;Acc:MGI:1341297]	GO:0006468(protein amino acid phosphorylation);GO:0006915(apoptosis);GO:0006917(induction of apoptosis);GO:0007243(protein kinase cascade)	GO:0000166(nucleotide binding);GO:0004672(protein kinase activity);GO:0004674(protein serine/threonine kinase activity);GO:0004685(calcium- and calmodulin-dependent protein kinase activity);GO:0004713(protein-tyrosine kinase activity);GO:0005516(calmodulin binding);GO:0005524(ATP binding);GO:0016301(kinase activity);GO:0016740(transferase activity);GO:0042802(identical protein binding)	GO:0005737(cytoplasm)	92.217	427.574	4.63661	2.21307	**		92.217	14.4087	0.156248	-2.67809		**
Btbd10	M200013707	ENSMUSG00000038187	NM_133700	0	Btbd10	BTB (POZ) domain containing 10 [Source:MarkerSymbol;Acc:MGI:1916065]	GO:0006813(potassium ion transport)	GO:0005249(voltage-gated potassium channel activity);GO:0005515(protein binding)	GO:0005634(nucleus);GO:0008076(voltage-gated potassium channel complex);GO:0016020(membrane)	60.8231	39.509	0.649573	-0.622436			60.8231	28.8761	0.474756	-1.07474		*
Tfg	M200013565	ENSMUSG00000022757	NM_019678	0	Tfg	Trk-fused gene [Source:MarkerSymbol;Acc:MGI:1338041]		GO:0005515(protein binding);GO:0042802(identical protein binding)		347.709	252.078	0.72497	-0.464006			347.709	304.991	0.877144	-0.189115
Rwdd2	M200013541	ENSMUSG00000032417	NM_027100	69519	Rwdd2	RWD domain containing 2 [Source:MarkerSymbol;Acc:MGI:1916769]				8.02415	6.49965	0.810012	-0.303986			8.02415	3.05511	0.380739	-1.39313		*
Zbtb7c	M200013325	ENSMUSG00000044646	NM_145356	207259	Zbtb7c	zinc finger and BTB domain containing 7C [Source:MarkerSymbol;Acc:MGI:2443302]	GO:0006350(transcription);GO:0006355(regulation of transcription, DNA-dependent)	GO:0003676(nucleic acid binding);GO:0005515(protein binding);GO:0008270(zinc ion binding);GO:0046872(metal ion binding)	GO:0005622(intracellular)	379.846	284.001	0.747673	-0.41952			379.846	421.016	1.10838	0.148459
1700058C01Rik	M200013296	ENSMUSG00000042320	NM_175198	73422	1700058C01Rik	RIKEN cDNA 1700058C01 gene [Source:MarkerSymbol;Acc:MGI:1920672]	GO:0007275(multicellular organismal development);GO:0045449(regulation of transcription)	GO:0003677(DNA binding);GO:0030528(transcription regulator activity)	GO:0005634(nucleus)	6.96948	7.16466	1.02801	0.0398479			6.96948	3.25767	0.46742	-1.09721		*
Gdi1	M200013074	ENSMUSG00000015291	NM_010273	14567	Gdi1	guanosine diphosphate (GDP) dissociation inhibitor 1 [Source:MarkerSymbol;Acc:MGI:99846]				366.937	240.289	0.65485	-0.610763			366.937	100.28	0.273289	-1.8715		*
Col20a1	M400000256	ENSMUSG00000016356	XM_181390	0	Col20a1	collagen, type XX, alpha 1 [Source:MarkerSymbol;Acc:MGI:1920618]	GO:0006817(phosphate transport);GO:0007155(cell adhesion)	GO:0005198(structural molecule activity)	GO:0005737(cytoplasm)	4.82007	4.81433	0.998809	-0.00171901			4.82007	2.03038	0.421236	-1.2473		*
Rabif	M200012853	ENSMUSG00000042229	NM_145510	98710	Rabif	RAB interacting factor [Source:MarkerSymbol;Acc:MGI:2138605]	GO:0006810(transport);GO:0007264(small GTPase mediated signal transduction);GO:0015031(protein transport)	GO:0005085(guanyl-nucleotide exchange factor activity);GO:0008270(zinc ion binding);GO:0046872(metal ion binding)		278.79	268.449	0.962907	-0.0545313			278.79	182.372	0.654155	-0.612296
Prnpip1	M200012821	ENSMUSG00000033423	NM_080469	0	Prnpip1	prion protein interacting protein 1 [Source:MarkerSymbol;Acc:MGI:2153887]	GO:0008150(biological_process)	GO:0004527(exonuclease activity);GO:0005515(protein binding)	GO:0005622(intracellular);GO:0005886(plasma membrane)	460.026	555.576	1.20771	0.272269			460.026	264.97	0.575989	-0.795886
4931407K02Rik	M200012613	ENSMUSG00000022441	NM_029946	77627	4931407K02Rik	RIKEN cDNA 4931407K02 gene [Source:MarkerSymbol;Acc:MGI:1924877]	GO:0006350(transcription);GO:0006355(regulation of transcription, DNA-dependent)	GO:0005509(calcium ion binding)	GO:0005634(nucleus)	6.75341	6.7776	1.00358	0.0051583			6.75341	3.51179	0.520002	-0.94341
Ecgf1	M200012586	ENSMUSG00000022615	NM_138302	0	Ecgf1	endothelial cell growth factor 1 (platelet-derived) [Source:MarkerSymbol;Acc:MGI:1920212]	GO:0006118(electron transport);GO:0006206(pyrimidine base metabolic process);GO:0006935(chemotaxis);GO:0008152(metabolic process);GO:0009887(organ morphogenesis)	GO:0004645(phosphorylase activity);GO:0009032(thymidine phosphorylase activity);GO:0016740(transferase activity);GO:0016757(transferase activity, transferring glycosyl groups)		99.9103	75.2758	0.753434	-0.408448			99.9103	115.035	1.15138	0.203366
Ucn2	M200012182	ENSMUSG00000049699		171530	Ucn2	urocortin 2 [Source:MarkerSymbol;Acc:MGI:2176375]				4.4	3.63389	0.825884	-0.275989			4.4	1.50672	0.342437	-1.54609		*
Zfp189	M200012160									22.7905	21.2861	0.933992	-0.0985184			22.7905	10.6758	0.468434	-1.09408		*
Adck1	M200011991	ENSMUSG00000021044	NM_028105	72113	Adck1	aarF domain containing kinase 1 [Source:MarkerSymbol;Acc:MGI:1919363]	GO:0006468(protein amino acid phosphorylation)	GO:0000166(nucleotide binding);GO:0004672(protein kinase activity);GO:0005524(ATP binding);GO:0016301(kinase activity);GO:0016740(transferase activity)		101.08	157.629	1.55946	0.641042			101.08	120.264	1.1898	0.250717
Aldh3a2	M400000173	ENSMUSG00000010025		0	Aldh3a2	aldehyde dehydrogenase family 3, subfamily A2 [Source:MarkerSymbol;Acc:MGI:1353452]				35.8041	31.2694	0.873349	-0.195369			35.8041	23.8617	0.666453	-0.585426
Notch4	M200011763	ENSMUSG00000015468	NM_010929	18132	Notch4	Notch gene homolog 4 (Drosophila) [Source:MarkerSymbol;Acc:MGI:107471]	GO:0001569(patterning of blood vessels);GO:0001709(cell fate determination);GO:0001763(morphogenesis of a branching structure);GO:0006350(transcription);GO:0006355(regulation of transcription, DNA-dependent);GO:0007219(Notch signaling pathway);GO:0007275(multicellular organismal development);GO:0009790(embryonic development);GO:0030097(hemopoiesis);GO:0030154(cell differentiation);GO:0045602(nega…	GO:0004872(receptor activity);GO:0005509(calcium ion binding);GO:0005515(protein binding);GO:0046982(protein heterodimerization activity)	GO:0005634(nucleus);GO:0005887(integral to plasma membrane);GO:0009986(cell surface);GO:0016020(membrane);GO:0016021(integral to membrane)	6.30221	6.78162	1.07607	0.105773			6.30221	3.1742	0.503665	-0.989463
Dhrs10	M200011733									7.41462	5.09607	0.687301	-0.540987			7.41462	5.37623	0.725085	-0.463778
Trub1	M200011234	ENSMUSG00000025086	NM_029839	0	Trub1	TruB pseudouridine (psi) synthase homolog 1 (E. coli) [Source:MarkerSymbol;Acc:MGI:1919383]	GO:0006396(RNA processing);GO:0008033(tRNA processing)	GO:0004730(pseudouridylate synthase activity);GO:0016439(tRNA-pseudouridine synthase activity);GO:0016853(isomerase activity)		13.361	10.2579	0.767752	-0.381288			13.361	14.821	1.10927	0.149615
Slc24a2	M200011171	ENSMUSG00000037996	NM_172426	0	Slc24a2	solute carrier family 24 (sodium/potassium/calcium exchanger), member 2 [Source:MarkerSymbol;Acc:MGI:1923626]			GO:0016021(integral to membrane)	123.319	67.0988	0.544109	-0.878031			123.319	159.064	1.28986	0.367218
1700016H13Rik	M200010706	ENSMUSG00000029320	XM_132216	0	1700016H13Rik	RIKEN cDNA 1700016H13 gene [Source:MarkerSymbol;Acc:MGI:1921468]				4.30264	4.30966	1.00163	0.00235319			4.30264	2.17712	0.505995	-0.982804
-	M400000641									11.471	8.23378	0.717789	-0.478369			11.471	9.60353	0.837199	-0.256358
Evx2	M200016257	ENSMUSG00000001815	NM_007967	0	Evx2	even skipped homeotic gene 2 homolog [Source:MarkerSymbol;Acc:MGI:95462]	GO:0006355(regulation of transcription, DNA-dependent);GO:0007275(multicellular organismal development);GO:0045449(regulation of transcription)	GO:0003677(DNA binding);GO:0003700(transcription factor activity);GO:0043565(sequence-specific DNA binding)	GO:0005634(nucleus)	8.0954	5.32618	0.657927	-0.604001			8.0954	2.83529	0.350235	-1.5136		*
Rer1	M200016217	ENSMUSG00000029048	NM_026395	67830	Rer1	RER1 retention in endoplasmic reticulum 1 homolog (S. cerevisiae) [Source:MarkerSymbol;Acc:MGI:1915080]			GO:0016020(membrane);GO:0016021(integral to membrane)	1073.95	937.646	0.873081	-0.195812			1073.95	596.892	0.555791	-0.847386
Polk	M200016031	ENSMUSG00000021668	NM_012048	0	Polk	polymerase (DNA directed), kappa [Source:MarkerSymbol;Acc:MGI:1349767]	GO:0006260(DNA replication);GO:0006281(DNA repair);GO:0006974(response to DNA damage stimulus)	GO:0000287(magnesium ion binding);GO:0003677(DNA binding);GO:0003887(DNA-directed DNA polymerase activity);GO:0008270(zinc ion binding);GO:0016450(kappa DNA polymerase activity);GO:0016740(transferase activity);GO:0016779(nucleotidyltransferase activity);GO:0046872(metal ion binding)	GO:0005634(nucleus)	95.8814	81.8858	0.854032	-0.227638			95.8814	86.0978	0.897961	-0.155275
Lace1	M200016009	ENSMUSG00000038302	NM_145743	215951	Lace1	lactation elevated 1 [Source:MarkerSymbol;Acc:MGI:2148801]	GO:0008150(biological_process)	GO:0000166(nucleotide binding);GO:0003674(molecular_function);GO:0005524(ATP binding)	GO:0005575(cellular_component)	83.3506	76.7898	0.921286	-0.118279			83.3506	50.436	0.605107	-0.724738
Snap29	M200015836	ENSMUSG00000022765	NM_023348	0	Snap29	synaptosomal-associated protein [Source:MarkerSymbol;Acc:MGI:1914724]	GO:0006810(transport);GO:0006886(intracellular protein transport);GO:0015031(protein transport)	GO:0008565(protein transporter activity);GO:0019905(syntaxin binding)	GO:0016020(membrane);GO:0019717(synaptosome);GO:0045202(synapse)	73.6164	83.6369	1.13612	0.184113			73.6164	67.4723	0.916539	-0.125731
2010012O05Rik	M200015811	ENSMUSG00000062376	NM_025563	66439	2010012O05Rik	RIKEN cDNA 2010012O05 gene [Source:MarkerSymbol;Acc:MGI:1913689]				84.678	90.7978	1.07227	0.100669			84.678	95.2079	1.12435	0.169093
Slc29a3	M200015601									56.7594	54.5909	0.961796	-0.0561978			56.7594	50.6311	0.892031	-0.164834
Ppp2r2a	M400000535	ENSMUSG00000022052		71978	Ppp2r2a	protein phosphatase 2 (formerly 2A), regulatory subunit B (PR 52), alpha isoform [Source:MarkerSymbol;Acc:MGI:1919228]	GO:0006470(protein amino acid dephosphorylation);GO:0007165(signal transduction)	GO:0000158(protein phosphatase type 2A activity);GO:0005515(protein binding);GO:0008601(protein phosphatase type 2A regulator activity)	GO:0000159(protein phosphatase type 2A complex)	119.579	56.338	0.471134	-1.08579		*	119.579	63.0496	0.527261	-0.923411
4921517D22Rik	M200015353	ENSMUSG00000049902	NM_183290	70900	4921517D22Rik	RIKEN cDNA 4921517D22 gene [Source:MarkerSymbol;Acc:MGI:1918150]				11.4351	8.67967	0.75904	-0.397752			11.4351	5.5562	0.485892	-1.04129		*
4833424O15Rik	M200015328	ENSMUSG00000033342	XM_131156	75769	4833424O15Rik	RIKEN cDNA 4833424O15 gene [Source:MarkerSymbol;Acc:MGI:1923019]			GO:0016021(integral to membrane)	3.9735	4.08862	1.02897	0.0412022			3.9735	1.09152	0.274701	-1.86407		*
Abcc6	M200015113	ENSMUSG00000030834	NM_018795	27421	Abcc6	ATP-binding cassette, sub-family C (CFTR/MRP), member 6 [Source:MarkerSymbol;Acc:MGI:1351634]	GO:0006810(transport)	GO:0000166(nucleotide binding);GO:0005215(transporter activity);GO:0005524(ATP binding);GO:0016887(ATPase activity);GO:0017111(nucleoside-triphosphatase activity);GO:0042626(ATPase activity, coupled to transmembrane movement of substances)	GO:0016020(membrane);GO:0016021(integral to membrane)	12.8372	10.198	0.794408	-0.332047			12.8372	10.4555	0.814468	-0.296071
Prdm16	M200015095	ENSMUSG00000039410		0	Prdm16	PR domain containing 16 [Source:MarkerSymbol;Acc:MGI:1917923]	GO:0006350(transcription);GO:0006355(regulation of transcription, DNA-dependent)	GO:0003676(nucleic acid binding);GO:0003677(DNA binding);GO:0008270(zinc ion binding);GO:0046872(metal ion binding)	GO:0005622(intracellular);GO:0005634(nucleus)	4.50762	3.30221	0.732584	-0.448933			4.50762	1.15239	0.255655	-1.96773		*
Agrp	M200014883	ENSMUSG00000005705	NM_007427	11604	Agrp	agouti related protein [Source:MarkerSymbol;Acc:MGI:892013]	GO:0007218(neuropeptide signaling pathway);GO:0008150(biological_process);GO:0009755(hormone-mediated signaling)	GO:0005184(neuropeptide hormone activity)	GO:0005576(extracellular region);GO:0005615(extracellular space)	6.25654	5.71522	0.913481	-0.130554			6.25654	2.486	0.397344	-1.33154		*
Fut1	M200014860	ENSMUSG00000008461	NM_008051	14343	Fut1	fucosyltransferase 1 [Source:MarkerSymbol;Acc:MGI:109375]	GO:0005975(carbohydrate metabolic process)	GO:0008107(galactoside 2(alpha-L-fucosyltransferase activity);GO:0016740(transferase activity);GO:0016757(transferase activity, transferring glycosyl groups)	GO:0005615(extracellular space);GO:0005794(Golgi apparatus);GO:0016020(membrane);GO:0016021(integral to membrane)	4.14441	2.73872	0.660822	-0.597667			4.14441	0.589391	0.142213	-2.81387		**
Parp9	M200014659	ENSMUSG00000022906	NM_030253	0	Parp9	poly (ADP-ribose) polymerase family, member 9 [Source:MarkerSymbol;Acc:MGI:1933117]	GO:0006471(protein amino acid ADP-ribosylation);GO:0006605(protein targeting);GO:0006886(intracellular protein transport)	GO:0003950(NAD+ ADP-ribosyltransferase activity);GO:0016740(transferase activity)	GO:0005634(nucleus);GO:0016020(membrane)	27.9857	47.026	1.68036	0.748768			27.9857	3.92089	0.140103	-2.83544		**
Q5SUX9_MOUSE	M400000424									123.971	98.7024	0.796171	-0.328851			123.971	100.105	0.807485	-0.308493
Reg4	M200014464	ENSMUSG00000027876	NM_026328	67709	Reg4	regenerating islet-derived family, member 4 [Source:MarkerSymbol;Acc:MGI:1914959]	GO:0008150(biological_process)	GO:0005529(sugar binding)	GO:0005615(extracellular space);GO:0005737(cytoplasm)	3.54509	4.30581	1.21458	0.280462			3.54509	0.78264	0.220767	-2.1794		**
Ttn	M200014444	ENSMUSG00000047319	XM_130312	0	Ttn	titin [Source:MarkerSymbol;Acc:MGI:98864]	GO:0001701(in utero embryonic development);GO:0003007(heart morphogenesis);GO:0005975(carbohydrate metabolic process);GO:0006278(RNA-dependent DNA replication);GO:0006468(protein amino acid phosphorylation);GO:0006508(proteolysis);GO:0006936(muscle contraction);GO:0006979(response to oxidative stress);GO:0007155(cell adhesion);GO:0007512(adult heart development);GO:0007517(muscle development);GO:…	GO:0003723(RNA binding);GO:0003964(RNA-directed DNA polymerase activity);GO:0004198(calpain activity);GO:0004601(peroxidase activity);GO:0004674(protein serine/threonine kinase activity);GO:0004713(protein-tyrosine kinase activity);GO:0005021(vascular endothelial growth factor receptor activity);GO:0005200(structural constituent of cytoskeleton);GO:0005515(protein binding);GO:0005524(ATP binding)…	GO:0005622(intracellular);GO:0005859(muscle myosin complex);GO:0016021(integral to membrane);GO:0030017(sarcomere);GO:0030018(Z disc);GO:0031430(M line);GO:0031672(A band);GO:0031674(I band)	70.3885	276.615	3.92983	1.97447	*		70.3885
Car9	M200014286	ENSMUSG00000028463	NM_139305	0	Car9	carbonic anhydrase 9 [Source:MarkerSymbol;Acc:MGI:2447188]	GO:0002009(morphogenesis of an epithelium);GO:0006730(one-carbon compound metabolic process);GO:0046903(secretion)	GO:0004089(carbonate dehydratase activity);GO:0008270(zinc ion binding);GO:0016829(lyase activity);GO:0046872(metal ion binding)	GO:0016020(membrane);GO:0016021(integral to membrane)	12.2919	11.3149	0.920515	-0.119486			12.2919	7.11069	0.578487	-0.789645
Tmem138	M200014264	ENSMUSG00000024666	NM_028411	72982	Tmem138	transmembrane protein 138 [Source:MarkerSymbol;Acc:MGI:1920232]			GO:0016021(integral to membrane)	77.0347	52.124	0.67663	-0.563562			77.0347	46.7327	0.606644	-0.721077
Cap2	M200014106	ENSMUSG00000021373	NM_026056	67252	Cap2	CAP, adenylate cyclase-associated protein, 2 (yeast) [Source:MarkerSymbol;Acc:MGI:1914502]			GO:0016020(membrane)	7.43834	28.9143	3.88719	1.95873	*		7.43834	3.10376	0.417265	-1.26096		*
Foxq1	M200014070	ENSMUSG00000038415	NM_008239	15220	Foxq1	forkhead box Q1 [Source:MarkerSymbol;Acc:MGI:1298228]	GO:0006350(transcription);GO:0006355(regulation of transcription, DNA-dependent);GO:0031069(hair follicle morphogenesis)	GO:0003677(DNA binding);GO:0003700(transcription factor activity);GO:0043565(sequence-specific DNA binding)	GO:0005634(nucleus);GO:0005667(transcription factor complex)	4.26316	4.97439	1.16683	0.222597			4.26316	2.74119	0.642994	-0.637122
Olfr456	M400006513	ENSMUSG00000058825;ENSMUSG00000068573		259144	Olfr456	olfactory receptor 456 [Source:MarkerSymbol;Acc:MGI:3030290]	GO:0007165(signal transduction);GO:0007186(G-protein coupled receptor protein signaling pathway);GO:0007608(sensory perception of smell);GO:0050896(response to stimulus)	GO:0004871(signal transducer activity);GO:0004872(receptor activity);GO:0004930(G-protein coupled receptor activity);GO:0004984(olfactory receptor activity)	GO:0016020(membrane);GO:0016021(integral to membrane)	30.666	22.2497	0.725549	-0.462855			30.666	28.2573	0.921453	-0.118018
C130052I12Rik	M300002854									1011.76	969.21	0.957941	-0.0619914			1011.76	832.834	0.823151	-0.280771
0610010D24Rik	M300002606	ENSMUSG00000021182	NM_026681	68339	0610010D24Rik	RIKEN cDNA 0610010D24 gene [Source:MarkerSymbol;Acc:MGI:1915589]				11.1464	6.55486	0.58807	-0.765939			11.1464	5.47537	0.491224	-1.02555		*
Casp1	M200000383	ENSMUSG00000025888	NM_009807	100044207	Casp1	caspase 1 [Source:MarkerSymbol;Acc:MGI:96544]	GO:0001666(response to hypoxia);GO:0006508(proteolysis);GO:0006915(apoptosis);GO:0006917(induction of apoptosis);GO:0008219(cell death);GO:0016485(protein processing);GO:0042981(regulation of apoptosis)	GO:0005515(protein binding);GO:0008233(peptidase activity);GO:0008234(cysteine-type peptidase activity);GO:0016787(hydrolase activity);GO:0030693(caspase activity)	GO:0005576(extracellular region);GO:0005622(intracellular);GO:0005737(cytoplasm)	19.9853	26.6832	1.33514	0.416996			19.9853	10.7229	0.536539	-0.898246
Sumo2	M300002370	ENSMUSG00000020738	NM_133354	100048458	Sumo2	SMT3 suppressor of mif two 3 homolog 2 (yeast) [Source:MarkerSymbol;Acc:MGI:2158813]	GO:0006464(protein modification);GO:0006512(ubiquitin cycle);GO:0016925(protein sumoylation)	GO:0019949(SUMO conjugating enzyme activity)	GO:0005575(cellular_component);GO:0005634(nucleus)	4881.33	4448.75	0.911381	-0.133874			4881.33	2664.06	0.545765	-0.873649
Rasl10b	M300002334									17.6153	12.3787	0.702724	-0.50897			17.6153	9.21489	0.52312	-0.934786
Sumo3	M300002101	ENSMUSG00000020265		0	Sumo3	SMT3 suppressor of mif two 3 homolog 3 (yeast) [Source:MarkerSymbol;Acc:MGI:1336201]	GO:0006464(protein modification);GO:0006512(ubiquitin cycle);GO:0016925(protein sumoylation)	GO:0019949(SUMO conjugating enzyme activity)		726.775	629.289	0.865865	-0.207786			726.775	468.506	0.644638	-0.633439
Q3UQ04_MOUSE	M400000847									127.919	117.383	0.917632	-0.124012			127.919	118.03	0.922689	-0.116083
Cd164	M300001846	ENSMUSG00000019818	NM_016898	53599	Cd164	CD164 antigen [Source:MarkerSymbol;Acc:MGI:1859568]	GO:0007155(cell adhesion);GO:0007157(heterophilic cell adhesion)		GO:0005615(extracellular space);GO:0005886(plasma membrane);GO:0016021(integral to membrane)	2402.51	3438.59	1.43125	0.517276			2402.51	1090.35	0.45384	-1.13974		*
Tmc4	M300001812									32.6725	36.3203	1.11165	0.152698			32.6725	23.2179	0.710624	-0.492841
Wsb1	M300001601	ENSMUSG00000017677		78889	Wsb1	WD repeat and SOCS box-containing 1 [Source:MarkerSymbol;Acc:MGI:1926139]	GO:0007242(intracellular signaling cascade);GO:0008150(biological_process)	GO:0003674(molecular_function)	GO:0005575(cellular_component);GO:0005622(intracellular)	516.123	401.454	0.777827	-0.362479			516.123	275.593	0.533968	-0.905175
Stac2	M300001578	ENSMUSG00000017400	NM_146028	217154	Stac2	SH3 and cysteine rich domain 2 [Source:MarkerSymbol;Acc:MGI:2144518]	GO:0007242(intracellular signaling cascade);GO:0008150(biological_process)	GO:0003674(molecular_function);GO:0008270(zinc ion binding);GO:0019992(diacylglycerol binding);GO:0046872(metal ion binding)	GO:0005575(cellular_component)	608.845	328.829	0.540086	-0.888739			608.845	235.837	0.387351	-1.36829		*
Adamts13	M300001343	ENSMUSG00000014852	NM_001001322	279028	Adamts13	a disintegrin-like and metallopeptidase (reprolysin type) with thrombospondin type 1 motif, 13 [Source:MarkerSymbol;Acc:MGI:2685556]				4.82841	7.16421	1.48376	0.569259			4.82841	2.94161	0.60923	-0.714941
Klra6	M300001308	ENSMUSG00000030173;ENSMUSG00000061769	NM_008464;NM_053154	100044301	Klra6	killer cell lectin-like receptor, subfamily A, member 6 [Source:MarkerSymbol;Acc:MGI:101902]	GO:0008150(biological_process)	GO:0003674(molecular_function);GO:0004872(receptor activity);GO:0005529(sugar binding)	GO:0005886(plasma membrane)	8.61083	5.04183	0.585522	-0.772205			8.61083	6.27311	0.728514	-0.456972
Tcfcp2	M300001069	ENSMUSG00000009733		21422	Tcfcp2	transcription factor CP2 [Source:MarkerSymbol;Acc:MGI:98509]	GO:0006350(transcription);GO:0006355(regulation of transcription, DNA-dependent);GO:0006357(regulation of transcription from RNA polymerase II promoter)	GO:0003677(DNA binding);GO:0016563(transcriptional activator activity)	GO:0005634(nucleus);GO:0005667(transcription factor complex)	51.9719	60.8649	1.17111	0.227879			51.9719	29.3174	0.5641	-0.825976
Map4k2	M400000784	ENSMUSG00000024948	NM_009006	26412	Map4k2	mitogen activated protein kinase kinase kinase kinase 2 [Source:MarkerSymbol;Acc:MGI:1346883]	GO:0006468(protein amino acid phosphorylation);GO:0006903(vesicle targeting);GO:0007243(protein kinase cascade)	GO:0000166(nucleotide binding);GO:0004672(protein kinase activity);GO:0004674(protein serine/threonine kinase activity);GO:0004713(protein-tyrosine kinase activity);GO:0005083(small GTPase regulator activity);GO:0005515(protein binding);GO:0005524(ATP binding);GO:0016301(kinase activity);GO:0016740(transferase activity)		31.941	21.5223	0.673814	-0.569578			31.941	23.2758	0.728715	-0.456574
Slc5a6	M300000838	ENSMUSG00000006641	NM_177870	0	Slc5a6	solute carrier family 5 (sodium-dependent vitamin transporter), member 6 [Source:MarkerSymbol;Acc:MGI:2660847]	GO:0006810(transport);GO:0006811(ion transport);GO:0006814(sodium ion transport)	GO:0005215(transporter activity);GO:0015293(symporter activity);GO:0031402(sodium ion binding)	GO:0016020(membrane);GO:0016021(integral to membrane)	28.5525	25.3811	0.888925	-0.169866			28.5525	29.9341	1.04838	0.0681683
Rbm14	M300000808	ENSMUSG00000006456	NM_019869	56275	Rbm14	RNA binding motif protein 14 [Source:MarkerSymbol;Acc:MGI:1929092]	GO:0006260(DNA replication);GO:0006281(DNA repair);GO:0006310(DNA recombination);GO:0006350(transcription);GO:0006355(regulation of transcription, DNA-dependent);GO:0008150(biological_process);GO:0009725(response to hormone stimulus);GO:0016575(histone deacetylation);GO:0030520(estrogen receptor signaling pathway);GO:0042921(glucocorticoid receptor signaling pathway);GO:0045944(positive regulatio…	GO:0000166(nucleotide binding);GO:0003674(molecular_function);GO:0003676(nucleic acid binding);GO:0003723(RNA binding);GO:0016455(RNA polymerase II transcription mediator activity);GO:0030374(ligand-dependent nuclear receptor transcription coactivator activity);GO:0030674(protein binding, bridging)	GO:0000119(mediator complex);GO:0005575(cellular_component);GO:0005634(nucleus);GO:0005667(transcription factor complex);GO:0030529(ribonucleoprotein complex)	170.62	84.5792	0.495717	-1.01241		*	170.62	89.0303	0.521804	-0.938419
Cd244	M300000600	ENSMUSG00000004709	NM_018729	677008	Cd244	CD244 natural killer cell receptor 2B4 [Source:MarkerSymbol;Acc:MGI:109294]				2.21428	2.6219	1.18409	0.243776			2.21428
Ctse	M300000564	ENSMUSG00000004552	NM_007799	0	Ctse	cathepsin E [Source:MarkerSymbol;Acc:MGI:107361]	GO:0006508(proteolysis);GO:0019886(antigen processing and presentation of exogenous peptide antigen via MHC class II)	GO:0004190(aspartic-type endopeptidase activity);GO:0004193(cathepsin E activity);GO:0004194(pepsin A activity);GO:0005198(structural molecule activity);GO:0008130(neutrophil collagenase activity);GO:0008233(peptidase activity);GO:0016787(hydrolase activity);GO:0042803(protein homodimerization activity)	GO:0005615(extracellular space);GO:0005768(endosome);GO:0019028(viral capsid);GO:0019031(viral envelope)	4.04285	2.34163	0.579203	-0.78786			4.04285	1.05325	0.260521	-1.94053		*
Zfp40	M300000326	ENSMUSG00000002617		22700	Zfp40	zinc finger protein 40 [Source:MarkerSymbol;Acc:MGI:99185]	GO:0006355(regulation of transcription, DNA-dependent)	GO:0003676(nucleic acid binding);GO:0008270(zinc ion binding);GO:0046872(metal ion binding)	GO:0005622(intracellular)	12.8176	12.5469	0.978882	-0.0307927			12.8176	21.3147	1.66293	0.733725
Zim1	M300000294	ENSMUSG00000002266	NM_011769	0	Zim1	zinc finger, imprinted 1 [Source:MarkerSymbol;Acc:MGI:1341879]	GO:0006355(regulation of transcription, DNA-dependent)	GO:0003676(nucleic acid binding);GO:0008270(zinc ion binding);GO:0046872(metal ion binding)	GO:0005622(intracellular);GO:0005634(nucleus)	8.66769	9.58221	1.10551	0.144711			8.66769	10.2202	1.17912	0.237709
Il12rb1	M300000119	ENSMUSG00000000791	NM_008353	0	Il12rb1	interleukin 12 receptor, beta 1 [Source:MarkerSymbol;Acc:MGI:104579]	GO:0007166(cell surface receptor linked signal transduction)	GO:0004872(receptor activity);GO:0004896(hematopoietin/interferon-class (D200(domain) cytokine receptor activity);GO:0004907(interleukin receptor activity)	GO:0005887(integral to plasma membrane);GO:0016020(membrane);GO:0016021(integral to membrane)	27.0139	20.1796	0.747008	-0.420805			27.0139	25.1727	0.931842	-0.101843
Ctbs	M300005988	ENSMUSG00000028189	NM_028836	74245	Ctbs	chitobiase, di-N-acetyl- [Source:MarkerSymbol;Acc:MGI:1921495]	GO:0005975(carbohydrate metabolic process);GO:0006032(chitin catabolic process);GO:0008152(metabolic process)	GO:0003824(catalytic activity);GO:0004553(hydrolase activity, hydrolyzing O-glycosyl compounds);GO:0004568(chitinase activity);GO:0016787(hydrolase activity);GO:0016798(hydrolase activity, acting on glycosyl bonds);GO:0043169(cation binding)	GO:0005615(extracellular space);GO:0005764(lysosome)	66.7033	53.421	0.800876	-0.32035			66.7033	64.0554	0.960304	-0.0584366
Gnb4	M300005743	ENSMUSG00000027669	NM_013531	0	Gnb4	guanine nucleotide binding protein, beta 4 [Source:MarkerSymbol;Acc:MGI:104581]	GO:0007165(signal transduction);GO:0007186(G-protein coupled receptor protein signaling pathway)	GO:0003924(GTPase activity);GO:0004871(signal transducer activity);GO:0005083(small GTPase regulator activity)	GO:0005834(heterotrimeric G-protein complex)	153.369	63.776	0.415834	-1.26592		*	153.369	84.7978	0.5529	-0.854909
Pcmtd2	M300005710	ENSMUSG00000027589	NM_153594	245867	Pcmtd2	protein-L-isoaspartate (D-aspartate) O-methyltransferase domain containing 2 [Source:MarkerSymbol;Acc:MGI:1923927]	GO:0006464(protein modification)	GO:0004719(protein-L-isoaspartate (D-aspartate) O-methyltransferase activity);GO:0008757(S-adenosylmethionine-dependent methyltransferase activity)		128.736	162.786	1.2645	0.338562			128.736	65.9156	0.512023	-0.96572
Prrg4	M300005495	ENSMUSG00000027171	NM_178695	676960	Prrg4	proline rich Gla (G-carboxyglutamic acid) 4 (transmembrane) [Source:MarkerSymbol;Acc:MGI:2442211]		GO:0005509(calcium ion binding)	GO:0005576(extracellular region);GO:0016020(membrane);GO:0016021(integral to membrane)	332.566	168.715	0.507312	-0.979054			332.566	162.985	0.490085	-1.0289		*
-	M300005476									10.8461	8.00843	0.73837	-0.437584			10.8461	8.51341	0.784929	-0.349366
2610300B10Rik	M300005248									183.917	90.798	0.49369	-1.01832		*	183.917	108.718	0.591122	-0.758471
Iars2	M300005209	ENSMUSG00000026618	NM_198653	636969	Iars2	isoleucine-tRNA synthetase 2, mitochondrial [Source:MarkerSymbol;Acc:MGI:1919586]				41.2391	36.1031	0.875456	-0.191893			41.2391	23.9441	0.580616	-0.784344
Fn1	M300004979	ENSMUSG00000026193	NM_010233	14268	Fn1	fibronectin 1 [Source:MarkerSymbol;Acc:MGI:95566]	GO:0000902(cell morphogenesis);GO:0006953(acute-phase response);GO:0007044(cell-substrate junction assembly);GO:0007155(cell adhesion);GO:0007160(cell-matrix adhesion);GO:0007169(transmembrane receptor protein tyrosine kinase signaling pathway);GO:0008152(metabolic process);GO:0042060(wound healing)	GO:0005515(protein binding);GO:0008201(heparin binding);GO:0016491(oxidoreductase activity);GO:0016504(protease activator activity)	GO:0005576(extracellular region);GO:0005578(proteinaceous extracellular matrix);GO:0016324(apical plasma membrane)	8607.27	12194.4	1.41676	0.502597			8607.27	3691.82	0.428919	-1.22122		*
Rhbdd1	M300004959									6.08894	8.17931	1.34331	0.425788			6.08894	3.86612	0.634942	-0.655303
Sdc3	M300004746	ENSMUSG00000025743	NM_011520	20970	Sdc3	syndecan 3 [Source:MarkerSymbol;Acc:MGI:1349163]		GO:0008092(cytoskeletal protein binding)	GO:0016020(membrane);GO:0016021(integral to membrane)	7.68335	5.15343	0.670727	-0.576202			7.68335	2.70184	0.351649	-1.50779		*
6620401K05Rik	M300004718	ENSMUSG00000025646	NM_172774	235610	6620401K05Rik	RIKEN cDNA 6620401K05 gene [Source:MarkerSymbol;Acc:MGI:1925349]	GO:0006281(DNA repair);GO:0006974(response to DNA damage stimulus)		GO:0005634(nucleus)	69.3981	74.9374	1.07982	0.110789			69.3981	40.0125	0.576565	-0.794445
Slc18a2	M300004482	ENSMUSG00000025094	NM_172523	0	Slc18a2	solute carrier family 18 (vesicular monoamine), member 2 [Source:MarkerSymbol;Acc:MGI:106677]	GO:0006810(transport);GO:0006836(neurotransmitter transport);GO:0015904(tetracycline transport)	GO:0005215(transporter activity);GO:0005386(carrier activity);GO:0015520(tetracycline:hydrogen antiporter activity)	GO:0005887(integral to plasma membrane);GO:0016020(membrane);GO:0016021(integral to membrane)	6.71896	5.43251	0.808534	-0.306619			6.71896	5.12665	0.763011	-0.390224
-	M300004446									3222.63	4083.05	1.26699	0.34141			3222.63	1859.53	0.577022	-0.793301
Setbp1	M300004201	ENSMUSG00000024548	NM_053099	240427	Setbp1	SET binding protein 1 [Source:MarkerSymbol;Acc:MGI:1933199]	GO:0006355(regulation of transcription, DNA-dependent)	GO:0003677(DNA binding);GO:0005515(protein binding)	GO:0005634(nucleus)	8.03952	25.3831	3.15729	1.65868	*		8.03952	3.92089	0.487701	-1.03593		*
Mdh1	M200001215	ENSMUSG00000020321	NM_008618	17449	Mdh1	malate dehydrogenase 1, NAD (soluble) [Source:MarkerSymbol;Acc:MGI:97051]	GO:0006096(glycolysis);GO:0006099(tricarboxylic acid cycle);GO:0006100(tricarboxylic acid cycle intermediate metabolic process);GO:0006108(malate metabolic process)	GO:0004459(L-lactate dehydrogenase activity);GO:0016491(oxidoreductase activity);GO:0016615(malate dehydrogenase activity);GO:0030060(L-malate dehydrogenase activity)	GO:0005829(cytosol)	1877.02	2139.88	1.14004	0.189086			1877.02	1237.72	0.659406	-0.600761
Rhoq	M300003942	ENSMUSG00000024143	NM_145491	104215	Rhoq	ras homolog gene family, member Q [Source:MarkerSymbol;Acc:MGI:1931553]	GO:0007264(small GTPase mediated signal transduction);GO:0008360(regulation of cell shape);GO:0030036(actin cytoskeleton organization and biogenesis)	GO:0000166(nucleotide binding);GO:0003924(GTPase activity);GO:0005515(protein binding);GO:0005525(GTP binding)	GO:0005622(intracellular);GO:0005886(plasma membrane);GO:0016020(membrane)	509.504	809.781	1.58935	0.668439			509.504	602.017	1.18158	0.240712
Nrxn1	M300003917	ENSMUSG00000024109	NM_020252	0	Nrxn1	neurexin I [Source:MarkerSymbol;Acc:MGI:1096391]	GO:0007155(cell adhesion);GO:0007268(synaptic transmission);GO:0007269(neurotransmitter secretion);GO:0007416(synaptogenesis)	GO:0005246(calcium channel regulator activity);GO:0005509(calcium ion binding);GO:0005515(protein binding);GO:0046872(metal ion binding)	GO:0005624(membrane fraction);GO:0016020(membrane);GO:0016021(integral to membrane);GO:0042734(presynaptic membrane)	8.96383	9.58289	1.06906	0.0963451			8.96383	8.19628	0.914372	-0.129146
Amhr2	M300003652	ENSMUSG00000023047	NM_144547	110542	Amhr2	anti-Mullerian hormone type 2 receptor [Source:MarkerSymbol;Acc:MGI:105062]	GO:0001880(Mullerian duct regression);GO:0006468(protein amino acid phosphorylation);GO:0007165(signal transduction);GO:0007179(transforming growth factor beta receptor signaling pathway);GO:0007548(sex differentiation)	GO:0000166(nucleotide binding);GO:0000287(magnesium ion binding);GO:0004672(protein kinase activity);GO:0004674(protein serine/threonine kinase activity);GO:0004675(transmembrane receptor protein serine/threonine kinase activity);GO:0004713(protein-tyrosine kinase activity);GO:0004872(receptor activity);GO:0005024(transforming growth factor beta receptor activity);GO:0005026(transforming growth f…	GO:0005615(extracellular space);GO:0005887(integral to plasma membrane);GO:0016020(membrane);GO:0016021(integral to membrane)	4.88844	6.82896	1.39696	0.48229			4.88844	18.8301	3.85196	1.94559	*
Fmnl3	M300003624	ENSMUSG00000023008	NM_011711	22379	Fmnl3	formin-like 3 [Source:MarkerSymbol;Acc:MGI:109569]	GO:0008150(biological_process);GO:0016043(cellular component organization and biogenesis);GO:0030036(actin cytoskeleton organization and biogenesis)	GO:0003779(actin binding);GO:0005515(protein binding);GO:0017048(Rho GTPase binding)	GO:0005575(cellular_component)	28.3094	20.1724	0.712568	-0.4889			28.3094	12.6798	0.447901	-1.15875		*
Rabl2a	M300003412	ENSMUSG00000022621	NM_026817	0	Rabl2a	RAB, member of RAS oncogene family-like 2A [Source:MarkerSymbol;Acc:MGI:1915958]				8.04791	7.9475	0.987523	-0.0181135			8.04791	8.60034	1.06864	0.0957786
Oplah	M300003373	ENSMUSG00000022562	NM_153122	75475	Oplah	5-oxoprolinase (ATP-hydrolysing) [Source:MarkerSymbol;Acc:MGI:1922725]		GO:0003824(catalytic activity);GO:0016787(hydrolase activity);GO:0017168(5(oxoprolinase (ATP-hydrolyzing) activity)		33.8335	53.8643	1.59204	0.670877			33.8335	16.7155	0.49405	-1.01727		*
DHRS4_MOUSE	M300003143									281.189	237.873	0.845955	-0.241347			281.189	171.973	0.611593	-0.709356
Lrrfip1	M400000912	ENSMUSG00000026305	NM_008515	16978	Lrrfip1	leucine rich repeat (in FLII) interacting protein 1 [Source:MarkerSymbol;Acc:MGI:1342770]				28.8798	32.561	1.12747	0.173084			28.8798	24.2836	0.840849	-0.250081
Trim36	M300009046	ENSMUSG00000033949	NM_178872	28105	Trim36	tripartite motif-containing 36 [Source:MarkerSymbol;Acc:MGI:106264]	GO:0006030(chitin metabolic process);GO:0007340(acrosome reaction)	GO:0005515(protein binding);GO:0008061(chitin binding);GO:0008270(zinc ion binding);GO:0046872(metal ion binding)	GO:0001669(acrosome);GO:0005576(extracellular region);GO:0005622(intracellular)	11.4081	4.47381	0.392161	-1.35048		*	11.4081	4.23694	0.371399	-1.42896		*
Usp36	M300009022	ENSMUSG00000033909	XM_126772	0	Usp36	ubiquitin specific peptidase 36 [Source:MarkerSymbol;Acc:MGI:1919594]	GO:0006511(ubiquitin-dependent protein catabolic process)	GO:0004197(cysteine-type endopeptidase activity);GO:0004221(ubiquitin thiolesterase activity);GO:0016787(hydrolase activity)		14.0739	5.37776	0.382109	-1.38794		*	14.0739	7.69308	0.546621	-0.871388
-	M300008744									5.61676	5.37448	0.956864	-0.0636139			5.61676	6.08489	1.08335	0.115494
1700009P03Rik	M300008709									38.5849	36.7664	0.95287	-0.0696488			38.5849	60.9754	1.58029	0.66019
Gtf3c1	M300008440	ENSMUSG00000032777	NM_207239	0	Gtf3c1	general transcription factor III C 1 [Source:MarkerSymbol;Acc:MGI:107887]	GO:0006350(transcription);GO:0006355(regulation of transcription, DNA-dependent)	GO:0003677(DNA binding);GO:0003700(transcription factor activity)	GO:0005634(nucleus);GO:0005667(transcription factor complex)	251.004	180.822	0.720397	-0.473136			251.004	98.3542	0.391844	-1.35165		*
-	M300008415									85.9585	63.1096	0.734187	-0.44578			85.9585	139.232	1.61975	0.695775
Ubl7	M300008187	ENSMUSG00000055720	NM_027086	69459	Ubl7	ubiquitin-like 7 (bone marrow stromal cell-derived) [Source:MarkerSymbol;Acc:MGI:1916709]	GO:0006464(protein modification);GO:0006605(protein targeting);GO:0006886(intracellular protein transport)	GO:0005515(protein binding)	GO:0016020(membrane)	97.1713	69.3279	0.713461	-0.487094			97.1713	28.9098	0.297514	-1.74897		*
Nnmt	M300008161	ENSMUSG00000032271	NM_010924	18113	Nnmt	nicotinamide N-methyltransferase [Source:MarkerSymbol;Acc:MGI:1099443]		GO:0008112(nicotinamide N-methyltransferase activity);GO:0008168(methyltransferase activity);GO:0016740(transferase activity)		41.3336	67.5376	1.63396	0.708375			41.3336	56.061	1.3563	0.439681
Hsbp1	M300007929	ENSMUSG00000031839	NM_024219	68196	Hsbp1	heat shock factor binding protein 1 [Source:MarkerSymbol;Acc:MGI:1915446]	GO:0000122(negative regulation of transcription from RNA polymerase II promoter)	GO:0003714(transcription corepressor activity)	GO:0005634(nucleus)	1201.28	1717.49	1.42972	0.515736			1201.28	723.646	0.602397	-0.731213
Mmp15	M300007902	ENSMUSG00000031790	NM_008609	17388	Mmp15	matrix metallopeptidase 15 [Source:MarkerSymbol;Acc:MGI:109320]	GO:0000270(peptidoglycan metabolic process);GO:0006508(proteolysis)	GO:0004222(metalloendopeptidase activity);GO:0005509(calcium ion binding);GO:0008233(peptidase activity);GO:0008237(metallopeptidase activity);GO:0008270(zinc ion binding);GO:0016787(hydrolase activity);GO:0046872(metal ion binding)	GO:0005578(proteinaceous extracellular matrix);GO:0005615(extracellular space);GO:0016020(membrane);GO:0016021(integral to membrane)	29.8661	24.3211	0.814339	-0.296299			29.8661	21.8925	0.733022	-0.448072
Cdkl5	M300007650	ENSMUSG00000031292		0	Cdkl5	cyclin-dependent kinase-like 5 [Source:MarkerSymbol;Acc:MGI:1278336]	GO:0006468(protein amino acid phosphorylation);GO:0008150(biological_process)	GO:0000166(nucleotide binding);GO:0004672(protein kinase activity);GO:0004674(protein serine/threonine kinase activity);GO:0005524(ATP binding);GO:0016301(kinase activity);GO:0016740(transferase activity)	GO:0005575(cellular_component)	4.12479	4.92881	1.19493	0.25692			4.12479	1.00566	0.243809	-2.03618		**
Msn	M300007610									381.601	137.767	0.361024	-1.46983		*	381.601	102.633	0.268955	-1.89457		*
Cyp2r1	M300007353	ENSMUSG00000030670	NM_177382	0	Cyp2r1	cytochrome P450, family 2, subfamily r, polypeptide 1 [Source:MarkerSymbol;Acc:MGI:2449771]	GO:0006118(electron transport);GO:0042359(vitamin D metabolic process)	GO:0004497(monooxygenase activity);GO:0005506(iron ion binding);GO:0016491(oxidoreductase activity);GO:0020037(heme binding);GO:0030343(vitamin D3 25(hydroxylase activity);GO:0046872(metal ion binding)	GO:0005575(cellular_component);GO:0005783(endoplasmic reticulum);GO:0005792(microsome);GO:0016020(membrane)	4.45076	2.68311	0.602844	-0.730143			4.45076	0.577179	0.129681	-2.94696		**
Agc1	M300007320	ENSMUSG00000030607	NM_007424	11595	Agc1	aggrecan 1 [Source:MarkerSymbol;Acc:MGI:99602]	GO:0001502(cartilage condensation);GO:0007155(cell adhesion);GO:0030166(proteoglycan biosynthetic process);GO:0030199(collagen fibril organization)	GO:0005509(calcium ion binding);GO:0005515(protein binding);GO:0005529(sugar binding);GO:0005540(hyaluronic acid binding)	GO:0005578(proteinaceous extracellular matrix);GO:0005604(basement membrane)	2.97705	2.57151	0.86378	-0.211265			2.97705
A630024B12Rik	M300007038									6.4232	4.41837	0.687877	-0.539777			6.4232	3.78637	0.589483	-0.762479
Sumf1	M300007004	ENSMUSG00000030101	NM_145937	58911	Sumf1	sulfatase modifying factor 1 [Source:MarkerSymbol;Acc:MGI:1889844]	GO:0016567(protein ubiquitination);GO:0030279(negative regulation of ossification)	GO:0005509(calcium ion binding);GO:0005515(protein binding);GO:0042803(protein homodimerization activity);GO:0046872(metal ion binding)	GO:0005783(endoplasmic reticulum)	124.689	167.915	1.34667	0.429393			124.689	128.775	1.03277	0.0465208
Oas1b	M300006763	ENSMUSG00000029605	NM_011853	0	Oas1b	2'-5' oligoadenylate synthetase 1B [Source:MarkerSymbol;Acc:MGI:97430]				8.39667	6.21196	0.739812	-0.43477			8.39667	3.00248	0.35758	-1.48366		*
2410014A08Rik	M300006732	ENSMUSG00000048578	NM_175403	109154	2410014A08Rik	RIKEN cDNA 2410014A08 gene [Source:MarkerSymbol;Acc:MGI:1924015]	GO:0006605(protein targeting)		GO:0016020(membrane);GO:0016021(integral to membrane)	226.221	177.452	0.784419	-0.350304			226.221	153.319	0.677742	-0.561192
-	M300006499									416.992	444.811	1.06671	0.0931719			416.992	261.306	0.626646	-0.674278
Dvl1	M300006465	ENSMUSG00000029071	NM_010091	13542	Dvl1	dishevelled, dsh homolog 1 (Drosophila) [Source:MarkerSymbol;Acc:MGI:94941]	GO:0001505(regulation of neurotransmitter levels);GO:0007242(intracellular signaling cascade);GO:0007269(neurotransmitter secretion);GO:0007275(multicellular organismal development);GO:0007528(neuromuscular junction development);GO:0016055(Wnt receptor signaling pathway);GO:0043113(receptor clustering);GO:0048813(dendrite morphogenesis);GO:0050808(synapse organization and biogenesis)	GO:0004871(signal transducer activity);GO:0005515(protein binding)	GO:0005622(intracellular);GO:0015630(microtubule cytoskeleton);GO:0016023(cytoplasmic membrane-bound vesicle);GO:0019717(synaptosome);GO:0045202(synapse)	122.185	104.484	0.85513	-0.225785			122.185	55.6564	0.45551	-1.13445		*
Dmbx1	M300006245	ENSMUSG00000028707		140477	Dmbx1	diencephalon/mesencephalon homeobox 1 [Source:MarkerSymbol;Acc:MGI:2153518]	GO:0006350(transcription);GO:0006355(regulation of transcription, DNA-dependent);GO:0007275(multicellular organismal development);GO:0007420(brain development);GO:0016481(negative regulation of transcription);GO:0045449(regulation of transcription);GO:0048589(developmental growth)	GO:0003677(DNA binding);GO:0003700(transcription factor activity);GO:0016564(transcriptional repressor activity);GO:0043565(sequence-specific DNA binding)	GO:0005634(nucleus)	26.2471	12.9916	0.494973	-1.01458		*	26.2471	8.58492	0.327081	-1.61228		*
Tceb3	M300006222	ENSMUSG00000028668	NM_013736	27224	Tceb3	transcription elongation factor B (SIII), polypeptide 3 [Source:MarkerSymbol;Acc:MGI:1351315]	GO:0006350(transcription);GO:0006355(regulation of transcription, DNA-dependent);GO:0045449(regulation of transcription)	GO:0003746(translation elongation factor activity)	GO:0005634(nucleus);GO:0016021(integral to membrane)	156.023	119.967	0.768905	-0.379122			156.023	117.97	0.756105	-0.403342
1110007M04Rik	M300006021	ENSMUSG00000028261	NM_026742	68493	1110007M04Rik	RIKEN cDNA 1110007M04 gene [Source:MarkerSymbol;Acc:MGI:1915743]				256.395	169.39	0.660657	-0.598026			256.395	261.374	1.01942	0.0277461
C1qtnf7	M300012362	ENSMUSG00000061535	NM_175425	109323	C1qtnf7	C1q and tumor necrosis factor related protein 7 [Source:MarkerSymbol;Acc:MGI:1925911]	GO:0006817(phosphate transport);GO:0051260(protein homooligomerization)	GO:0003674(molecular_function)	GO:0005615(extracellular space);GO:0005737(cytoplasm)	9.62089	6.3795	0.663088	-0.592728			9.62089	2.21753	0.230491	-2.11722		**
Picalm	M300012114	ENSMUSG00000039361	NM_146194	0	Picalm	phosphatidylinositol binding clathrin assembly protein [Source:MarkerSymbol;Acc:MGI:2385902]	GO:0006461(protein complex assembly);GO:0006897(endocytosis);GO:0006898(receptor-mediated endocytosis);GO:0007275(multicellular organismal development);GO:0030097(hemopoiesis)	GO:0005543(phospholipid binding);GO:0005545(phosphatidylinositol binding);GO:0030276(clathrin binding)	GO:0005905(coated pit)	407.13	339.055	0.832794	-0.263969			407.13	223.891	0.549926	-0.862691
Hexdc	M300012092	ENSMUSG00000039307	NM_001001333	238023	Hexdc	hexosaminidase (glycosyl hydrolase family 20, catalytic domain) containing [Source:MarkerSymbol;Acc:MGI:3605542]	GO:0005975(carbohydrate metabolic process)	GO:0004563(beta-N-acetylhexosaminidase activity);GO:0016787(hydrolase activity);GO:0043169(cation binding)		53.4444	62.0506	1.16103	0.215406			53.4444	13.5124	0.252831	-1.98376		*
Slco4a1	M300011867	ENSMUSG00000038963	NM_148933	108115	Slco4a1	solute carrier organic anion transporter family, member 4a1 [Source:MarkerSymbol;Acc:MGI:1351866]	GO:0006810(transport);GO:0006811(ion transport);GO:0008150(biological_process)	GO:0003674(molecular_function);GO:0005215(transporter activity)	GO:0005575(cellular_component);GO:0016020(membrane);GO:0016021(integral to membrane)	15.6231	5.15077	0.329689	-1.60082		*	15.6231	2.82705	0.180953	-2.46631		**
Pogz	M300011837	ENSMUSG00000038902	NM_172683	0	Pogz	pogo transposable element with ZNF domain [Source:MarkerSymbol;Acc:MGI:2442117]	GO:0007275(multicellular organismal development);GO:0045449(regulation of transcription)	GO:0003676(nucleic acid binding);GO:0003677(DNA binding);GO:0008270(zinc ion binding);GO:0046872(metal ion binding)	GO:0005622(intracellular);GO:0005634(nucleus)	80.7883	66.5836	0.824174	-0.278979			80.7883	61.3938	0.759935	-0.396052
4930520K10Rik	M300011582	ENSMUSG00000038491		0	4930520K10Rik	RIKEN cDNA 4930520K10 gene [Source:MarkerSymbol;Acc:MGI:1914837]				7.66895	7.11331	0.927547	-0.108508			7.66895	5.32971	0.694973	-0.524971
-	M300011528									1124.44	752.255	0.669006	-0.579909			1124.44	1171.02	1.04143	0.0585605
AW456874	M300011304	ENSMUSG00000038042	NM_207232	100047240	AW456874	expressed sequence AW456874 [Source:MarkerSymbol;Acc:MGI:2145430]	GO:0006470(protein amino acid dephosphorylation)	GO:0004725(protein tyrosine phosphatase activity);GO:0008138(protein tyrosine/serine/threonine phosphatase activity);GO:0016787(hydrolase activity);GO:0016791(phosphoric monoester hydrolase activity)		20.3858	12.2731	0.60204	-0.732069			20.3858	8.35125	0.40966	-1.2875		*
Igsf9	M300011271	ENSMUSG00000037995	NM_033608	0	Igsf9	immunoglobulin superfamily, member 9 [Source:MarkerSymbol;Acc:MGI:2135283]	GO:0016358(dendrite development)		GO:0005615(extracellular space);GO:0016021(integral to membrane);GO:0030425(dendrite)	21.6687	18.3735	0.847927	-0.237988			21.6687	4.54476	0.209738	-2.25334		**
1700022P22Rik	M300010991	ENSMUSG00000057072	XM_484955	0	1700022P22Rik	RIKEN cDNA 1700022P22 gene [Source:MarkerSymbol;Acc:MGI:1922808]				4.21982	4.81433	1.14088	0.190153			4.21982	0.696778	0.16512	-2.59841		**
BC043098	M300010963	ENSMUSG00000037503	NM_174997	214469	BC043098	cDNA sequence BC043098 [Source:MarkerSymbol;Acc:MGI:2448487]				276.155	239.003	0.865464	-0.208454			276.155	141.873	0.513743	-0.960882
Inhbb	M300010707	ENSMUSG00000037035	XM_148966	16324	Inhbb	inhibin beta-B [Source:MarkerSymbol;Acc:MGI:96571]				19.93	35.199	1.76613	0.820591			19.93	9.94509	0.499	-1.00289		*
Kcnq3	M300010675	ENSMUSG00000056258	NM_152923	110862	Kcnq3	potassium voltage-gated channel, subfamily Q, member 3 [Source:MarkerSymbol;Acc:MGI:1336181]	GO:0006810(transport);GO:0006811(ion transport);GO:0006813(potassium ion transport)	GO:0005216(ion channel activity);GO:0005244(voltage-gated ion channel activity);GO:0005249(voltage-gated potassium channel activity);GO:0005267(potassium channel activity);GO:0030955(potassium ion binding)	GO:0005887(integral to plasma membrane);GO:0008076(voltage-gated potassium channel complex);GO:0016020(membrane);GO:0016021(integral to membrane)	14.6988	14.6779	0.998577	-0.00205418			14.6988	9.67875	0.658471	-0.602809
BC032203	M300010444	ENSMUSG00000036568		210982	BC032203	cDNA sequence BC032203 [Source:MarkerSymbol;Acc:MGI:2673855]	GO:0008150(biological_process)	GO:0003674(molecular_function)	GO:0005575(cellular_component)	10.1061	7.89734	0.781442	-0.35579			10.1061	5.47537	0.541788	-0.884199
Capn11	M300010414	ENSMUSG00000058626	XM_193876	0	Capn11	calpain 11 [Source:MarkerSymbol;Acc:MGI:1352490]	GO:0006508(proteolysis)	GO:0004198(calpain activity);GO:0005509(calcium ion binding);GO:0008233(peptidase activity);GO:0008234(cysteine-type peptidase activity);GO:0016787(hydrolase activity)	GO:0005622(intracellular)	3.16227	4.032	1.27503	0.350535			3.16227	2.94986	0.93283	-0.100314
Q3TYA3_MOUSE	M400006985	ENSMUSG00000059852	XM_140499	0	Q3TYA3_MOUSE	Visual cortex cDNA, RIKEN full-length enriched library, clone:K430308M08 product:similar to Shab-like voltage-gated potassium channel cKv6.3 (Fragment). [Source:Uniprot/SPTREMBL;Acc:Q3TYA3]	GO:0006811(ion transport);GO:0006813(potassium ion transport)	GO:0005216(ion channel activity);GO:0005249(voltage-gated potassium channel activity);GO:0005515(protein binding)	GO:0008076(voltage-gated potassium channel complex);GO:0016020(membrane)		3.47117						2.31881
Dock4	M300010170	ENSMUSG00000035954	XM_358307	238130	Dock4	dedicator of cytokinesis 4 [Source:MarkerSymbol;Acc:MGI:1918006]		GO:0005085(guanyl-nucleotide exchange factor activity)	GO:0016020(membrane)	7.73224	9.3585	1.21032	0.27539			7.73224	8.49799	1.09903	0.136234
F730015K02Rik	M300009951	ENSMUSG00000053641	NM_176935	0	F730015K02Rik	RIKEN cDNA F730015K02 gene [Source:MarkerSymbol;Acc:MGI:2442199]				3.5958	3.58395	0.996705	-0.00476084			3.5958	3.51179	0.976636	-0.0341066
Ankrd38	M300009903	ENSMUSG00000035407	NM_172872	242553	Ankrd38	ankyrin repeat domain 38 [Source:MarkerSymbol;Acc:MGI:3043381]				9.19248	6.71855	0.730874	-0.452306			9.19248	5.11387	0.55631	-0.84604
-	M300009642									370.956	368.608	0.993672	-0.00915794			370.956	281.536	0.758948	-0.397926
Spert	M300009613	ENSMUSG00000034913	NM_026457	67926	Spert	spermatid associated [Source:MarkerSymbol;Acc:MGI:1915176]	GO:0008150(biological_process)	GO:0003674(molecular_function)	GO:0016023(cytoplasmic membrane-bound vesicle)	3.17257	3.46805	1.09314	0.128475			3.17257	1.44692	0.456074	-1.13266		*
Gulo	M300009356	ENSMUSG00000034450	NM_178747	268756	Gulo	gulonolactone (L-) oxidase [Source:MarkerSymbol;Acc:MGI:1353434]	GO:0006118(electron transport);GO:0009058(biosynthetic process);GO:0019853(L-ascorbic acid biosynthetic process)	GO:0003885(D-arabinono-1,4(lactone oxidase activity);GO:0016491(oxidoreductase activity);GO:0016899(oxidoreductase activity, acting on the CH-OH group of donors, oxygen as acceptor);GO:0050105(L-gulonolactone oxidase activity)	GO:0005783(endoplasmic reticulum);GO:0005792(microsome);GO:0016020(membrane);GO:0016021(integral to membrane)	6.08474	6.88943	1.13225	0.179188			6.08474	4.49106	0.738086	-0.438139
Dhx57	M300009325	ENSMUSG00000035051		106794	Dhx57	DEAH (Asp-Glu-Ala-Asp/His) box polypeptide 57 [Source:MarkerSymbol;Acc:MGI:2147067]	GO:0008150(biological_process)	GO:0000166(nucleotide binding);GO:0003674(molecular_function);GO:0003676(nucleic acid binding);GO:0004386(helicase activity);GO:0005524(ATP binding);GO:0008026(ATP-dependent helicase activity);GO:0008270(zinc ion binding);GO:0016787(hydrolase activity);GO:0046872(metal ion binding)	GO:0005575(cellular_component)	16.3371	15.0165	0.919169	-0.121598			16.3371	10.6498	0.651879	-0.617324
B230317F23Rik	M300016679	ENSMUSG00000045746	NM_177148	0	B230317F23Rik	RIKEN cDNA B230317F23 gene [Source:MarkerSymbol;Acc:MGI:2443920]				5.59304	5.71211	1.02129	0.0303913			5.59304	3.41875	0.611252	-0.710162
Pqlc3	M300016615	ENSMUSG00000045679	NM_172574	217430	Pqlc3	PQ loop repeat containing [Source:MarkerSymbol;Acc:MGI:2444067]			GO:0016020(membrane);GO:0016021(integral to membrane)	389	227.915	0.5859	-0.771273			389	204.577	0.525904	-0.927129
1700025H01Rik	M300016240	ENSMUSG00000045272	XM_148040;XM_358825	75531	1700025H01Rik	RIKEN cDNA 1700025H01 gene [Source:MarkerSymbol;Acc:MGI:1922781]				8.27144	6.66362	0.805618	-0.311832			8.27144	4.8515	0.586537	-0.769707
Asxl3	M300016186	ENSMUSG00000045215	XM_140204	0	Asxl3	additional sex combs like 3 (Drosophila) [Source:MarkerSymbol;Acc:MGI:2685175]				3.19121	4.48004	1.40387	0.489409			3.19121	1.64735	0.516215	-0.953955
-	M300015754									18.5838	29.8769	1.60768	0.684984			18.5838	39.1	2.10398	1.07312	*
A330102K23Rik	M300015653	ENSMUSG00000044647	NM_153409	0	A330102K23Rik	RIKEN cDNA A330102K23 gene [Source:MarkerSymbol;Acc:MGI:1925021]	GO:0006915(apoptosis)		GO:0005634(nucleus)	3.6061	1.73228	0.480375	-1.05777		*	3.6061	0.635909	0.176343	-2.50355		**
BC038822	M300015278	ENSMUSG00000044250	NM_172293	239647	BC038822	cDNA sequence BC038822 [Source:MarkerSymbol;Acc:MGI:2446270]		GO:0016301(kinase activity)		4.29336	1.5674	0.365075	-1.45373		*	4.29336	0.78371	0.18254	-2.45372		**
-	M300015221									12.0353	8.2335	0.684112	-0.547696			12.0353	6.55486	0.544636	-0.876636
1520401A03Rik	M300014808	ENSMUSG00000043747	NM_177132	0	1520401A03Rik	RIKEN cDNA 1520401A03 gene [Source:MarkerSymbol;Acc:MGI:2443785]				19.3414	18.7667	0.970284	-0.0435204			19.3414	12.7883	0.661187	-0.59687
Tshz3	M300014749	ENSMUSG00000021217	NM_172298	243931	Tshz3	teashirt zinc finger family member 3 [Source:MarkerSymbol;Acc:MGI:2442819]	GO:0006350(transcription);GO:0006355(regulation of transcription, DNA-dependent);GO:0007275(multicellular organismal development);GO:0045449(regulation of transcription)	GO:0003676(nucleic acid binding);GO:0003677(DNA binding);GO:0003700(transcription factor activity);GO:0008270(zinc ion binding);GO:0043565(sequence-specific DNA binding);GO:0046872(metal ion binding)	GO:0005622(intracellular);GO:0005634(nucleus)	130.312	169.097	1.29763	0.375883			130.312	48.931	0.375492	-1.41315		*
Zmpste24	M300014277	ENSMUSG00000043207	NM_172700	230709	Zmpste24	zinc metallopeptidase, STE24 homolog (S. cerevisiae) [Source:MarkerSymbol;Acc:MGI:1890508]	GO:0006508(proteolysis);GO:0006998(nuclear membrane organization and biogenesis);GO:0030327(prenylated protein catabolic process)	GO:0004222(metalloendopeptidase activity);GO:0008233(peptidase activity);GO:0008237(metallopeptidase activity);GO:0008270(zinc ion binding);GO:0016787(hydrolase activity);GO:0046872(metal ion binding)	GO:0005624(membrane fraction);GO:0005783(endoplasmic reticulum);GO:0016020(membrane);GO:0016021(integral to membrane)	253.163	174.534	0.689412	-0.536562			253.163	186.596	0.737056	-0.440153
BC022713	M300014222									26.5473	19.6173	0.738955	-0.436441			26.5473	22.8176	0.859505	-0.218421
Obfc1	M300013839	ENSMUSG00000042694	NM_175360	108689	Obfc1	oligonucleotide/oligosaccharide-binding fold containing 1 [Source:MarkerSymbol;Acc:MGI:1915581]		GO:0003676(nucleic acid binding)		452.309	309.928	0.685213	-0.545376			452.309	426.398	0.942716	-0.0851056
Flad1	M300013811									13.1817	13.6769	1.03757	0.0532029			13.1817	4.02003	0.30497	-1.71326		*
A530082C11Rik	M300013561	ENSMUSG00000042202	NM_177186	320541	A530082C11Rik	RIKEN cDNA A530082C11 gene [Source:MarkerSymbol;Acc:MGI:2444240]				7.14356	5.20597	0.728765	-0.456475			7.14356	4.4961	0.629392	-0.667969
Cox10	M300013533	ENSMUSG00000042148	NM_178379	70383	Cox10	COX10 homolog, cytochrome c oxidase assembly protein, heme A: farnesyltransferase (yeast) [Source:MarkerSymbol;Acc:MGI:1917633]	GO:0000266(mitochondrial fission);GO:0006783(heme biosynthetic process);GO:0006784(heme a biosynthetic process);GO:0007005(mitochondrion organization and biogenesis);GO:0008535(cytochrome c oxidase complex assembly);GO:0009060(aerobic respiration);GO:0017004(cytochrome complex assembly);GO:0018347(protein amino acid farnesylation)	GO:0004129(cytochrome-c oxidase activity);GO:0004311(farnesyltranstransferase activity);GO:0004659(prenyltransferase activity);GO:0008495(protoheme IX farnesyltransferase activity);GO:0016740(transferase activity)	GO:0005739(mitochondrion);GO:0016020(membrane);GO:0016021(integral to membrane)	136.834	108.117	0.790133	-0.339832			136.834	99.9079	0.730138	-0.453758
Rims1	M300013290	ENSMUSG00000041670		0	Rims1	regulating synaptic membrane exocytosis 1 [Source:MarkerSymbol;Acc:MGI:2152971]				1.91623	3.3051	1.72479	0.78642			1.91623
Sdk2	M300013237	ENSMUSG00000041592	NM_172800	237979	Sdk2	sidekick homolog 2 (chicken) [Source:MarkerSymbol;Acc:MGI:2443847]	GO:0006605(protein targeting);GO:0007155(cell adhesion)	GO:0005515(protein binding)	GO:0005615(extracellular space);GO:0016020(membrane);GO:0016021(integral to membrane)	3.45197	4.47862	1.29741	0.375634			3.45197	1.3943	0.403914	-1.30788		*
Ceacam13	M300012980										3.01978						0.884992
Padi6	M300012942	ENSMUSG00000040935	NM_153106	0	Padi6	peptidyl arginine deiminase, type VI [Source:MarkerSymbol;Acc:MGI:2655198]	GO:0006464(protein modification);GO:0008150(biological_process)	GO:0003674(molecular_function);GO:0004668(protein-arginine deiminase activity);GO:0005509(calcium ion binding);GO:0016787(hydrolase activity)	GO:0005634(nucleus);GO:0005737(cytoplasm);GO:0045111(intermediate filament cytoskeleton)	7.8016	4.08884	0.524104	-0.932076			7.8016	6.28639	0.805782	-0.311538
-	M300012668									85.5287	76.4498	0.89385	-0.161895			85.5287	47.7037	0.557751	-0.842307
-	M300012631									69.4157	61.0353	0.879272	-0.185618			69.4157	35.6255	0.513219	-0.962353
Slc45a1	M300012400	ENSMUSG00000039838	NM_173774	242773	Slc45a1	solute carrier family 45, member 1 [Source:MarkerSymbol;Acc:MGI:2653235]	GO:0006810(transport)	GO:0005351(sugar porter activity);GO:0015293(symporter activity)	GO:0016020(membrane);GO:0016021(integral to membrane)	16.2988	7.78885	0.477878	-1.06529		*	16.2988	14.7402	0.904369	-0.145017
Tardbp	M400002503	ENSMUSG00000041459	NM_145556	230908	Tardbp	TAR DNA binding protein [Source:MarkerSymbol;Acc:MGI:2387629]	GO:0006350(transcription);GO:0006355(regulation of transcription, DNA-dependent)	GO:0000166(nucleotide binding);GO:0003676(nucleic acid binding);GO:0003677(DNA binding);GO:0003723(RNA binding)	GO:0005634(nucleus)	1485.98	837.254	0.563434	-0.827683			1485.98	955.229	0.642826	-0.637501
Olfr1325	M300022316	ENSMUSG00000051706	NM_146398	258393	Olfr1325	olfactory receptor 1325 [Source:MarkerSymbol;Acc:MGI:3031159]	GO:0007165(signal transduction);GO:0007186(G-protein coupled receptor protein signaling pathway);GO:0007608(sensory perception of smell);GO:0050896(response to stimulus)	GO:0004871(signal transducer activity);GO:0004872(receptor activity);GO:0004930(G-protein coupled receptor activity);GO:0004984(olfactory receptor activity)	GO:0016020(membrane);GO:0016021(integral to membrane)	4.51596	3.41284	0.75573	-0.404058			4.51596	2.2845	0.505873	-0.983152
Krt1-9	M300022235									9.70376	7.38882	0.761439	-0.393199			9.70376	6.56921	0.676976	-0.562824
Trim31	M300021744	ENSMUSG00000058063	NM_146077	224762	Trim31	tripartite motif-containing 31 [Source:MarkerSymbol;Acc:MGI:2385051]		GO:0005515(protein binding);GO:0008270(zinc ion binding);GO:0046872(metal ion binding)	GO:0005622(intracellular)	5.85511	4.70607	0.803754	-0.315175			5.85511	2.53969	0.433756	-1.20504		*
Rhox11	M300021692	ENSMUSG00000051038	NM_198598	194738	Rhox11	reproductive homeobox 11 [Source:MarkerSymbol;Acc:MGI:2681831]	GO:0006350(transcription);GO:0006355(regulation of transcription, DNA-dependent)	GO:0003677(DNA binding);GO:0003700(transcription factor activity);GO:0043565(sequence-specific DNA binding)	GO:0005634(nucleus)	106.052	76.1097	0.717666	-0.478616			106.052	67.2769	0.634378	-0.656586
0910001L09Rik	M300021242	ENSMUSG00000050552	XM_132434	66096	0910001L09Rik	RIKEN cDNA 0910001L09 gene [Source:MarkerSymbol;Acc:MGI:1913346]				514.679	732.801	1.4238	0.509749			514.679	197.471	0.383678	-1.38203		*
Olfr807	M300021175	ENSMUSG00000050478	NM_146929	258931	Olfr807	olfactory receptor 807 [Source:MarkerSymbol;Acc:MGI:3030641]	GO:0007165(signal transduction);GO:0007186(G-protein coupled receptor protein signaling pathway);GO:0007608(sensory perception of smell);GO:0050896(response to stimulus)	GO:0004871(signal transducer activity);GO:0004872(receptor activity);GO:0004930(G-protein coupled receptor activity);GO:0004984(olfactory receptor activity)	GO:0016020(membrane);GO:0016021(integral to membrane)	5.07566	2.73758	0.539355	-0.890693			5.07566	1.67498	0.330003	-1.59945		*
D830007B15Rik	M300020719	ENSMUSG00000050010	XM_485619	330096	D830007B15Rik	RIKEN cDNA D830007B15 gene [Source:MarkerSymbol;Acc:MGI:3041225]				17.6846	19.5024	1.10279	0.141155			17.6846	21.5233	1.21707	0.283407
-	M400002411									11.7797	6.71855	0.570351	-0.810078			11.7797	8.80687	0.747633	-0.419598
Dtx3l	M300020249	ENSMUSG00000049502	XM_148582	209200	Dtx3l	deltex 3-like (Drosophila) [Source:MarkerSymbol;Acc:MGI:2656973]		GO:0005515(protein binding);GO:0008270(zinc ion binding);GO:0046872(metal ion binding)		18.6024	34.2398	1.84061	0.880185			18.6024	8.14472	0.437831	-1.19155		*
-	M300020152									13.6269	17.3642	1.27426	0.349659			13.6269	8.02298	0.588762	-0.764245
2810453I06Rik	M300019683	ENSMUSG00000048910	NM_026050;NM_133703	434799	2810453I06Rik	RIKEN cDNA 2810453I06 gene [Source:MarkerSymbol;Acc:MGI:1914488]				219.067	223.253	1.01911	0.0273067			219.067	173.151	0.790403	-0.33934
-	M300019624									2.54957	2.39774	0.940449	-0.0885778			2.54957	0.589391	0.231172	-2.11296		**
Fgfbp1	M300019179	ENSMUSG00000048373	NM_008009	14181	Fgfbp1	fibroblast growth factor binding protein 1 [Source:MarkerSymbol;Acc:MGI:1096350]	GO:0006355(regulation of transcription, DNA-dependent)	GO:0003677(DNA binding);GO:0019838(growth factor binding)	GO:0005634(nucleus);GO:0016020(membrane)	7.91946	15.1873	1.91772	0.939395			7.91946	8.09607	1.0223	0.0318188
Kif19a	M300019107									5.48356	3.97249	0.724435	-0.465072			5.48356	2.45276	0.447293	-1.16071		*
Flrt1	M300018618	ENSMUSG00000047787	NM_201411	0	Flrt1	fibronectin leucine rich transmembrane protein 3 [Source:MarkerSymbol;Acc:MGI:3026647]	GO:0007155(cell adhesion)	GO:0005515(protein binding)	GO:0016021(integral to membrane)	3.63402	4.98351	1.37135	0.455597			3.63402	3.16463	0.870836	-0.199527
Negr1	M400002323									119.144	106.436	0.893337	-0.162724			119.144	65.7638	0.551968	-0.857342
4931429P17Rik	M300018173	ENSMUSG00000047324		70971	4931429P17Rik	RIKEN cDNA 4931429P17 gene [Source:MarkerSymbol;Acc:MGI:1918221]				1.96792	2.18321	1.1094	0.14978			1.96792	0.683497	0.34732	-1.52566		*
AU020772	M300018100	ENSMUSG00000047248	XM_204259	0	AU020772	expressed sequence AU020772 [Source:MarkerSymbol;Acc:MGI:2142166]				115.563	105.528	0.913165	-0.131053			115.563	120.908	1.04626	0.065235
A530053G22Rik	M300017641	ENSMUSG00000046764	NM_177329	0	A530053G22Rik	RIKEN cDNA A530053G22 gene [Source:MarkerSymbol;Acc:MGI:2443347]				2.06948	1.84818	0.893069	-0.163157			2.06948	0.78371	0.3787	-1.40087		*
Foxc2	M300017601	ENSMUSG00000046714	NM_013519	14234	Foxc2	forkhead box C2 [Source:MarkerSymbol;Acc:MGI:1347481]	GO:0001501(skeletal development);GO:0001503(ossification);GO:0001569(patterning of blood vessels);GO:0001656(metanephros development);GO:0001657(ureteric bud development);GO:0001822(kidney development);GO:0001946(lymphangiogenesis);GO:0001974(blood vessel remodeling);GO:0006350(transcription);GO:0006355(regulation of transcription, DNA-dependent);GO:0007219(Notch signaling pathway);GO:0007275(mul…	GO:0003677(DNA binding);GO:0003700(transcription factor activity);GO:0016563(transcriptional activator activity);GO:0031490(chromatin DNA binding);GO:0043565(sequence-specific DNA binding)	GO:0005634(nucleus)	147.951	63.6736	0.430369	-1.21635		*	147.951	116.546	0.787734	-0.34422
A030007E19Rik	M300017163	ENSMUSG00000046248	XM_489211	0	A030007E19Rik	RIKEN cDNA A030007E19 gene [Source:MarkerSymbol;Acc:MGI:1924465]				25.6542	24.0447	0.93726	-0.0934793			25.6542	23.8734	0.930584	-0.103792
Nxph1	M300017101	ENSMUSG00000046178	NM_008751	18231	Nxph1	neurexophilin 1 [Source:MarkerSymbol;Acc:MGI:107492]		GO:0005102(receptor binding)	GO:0005615(extracellular space)	4.89874	4.93097	1.00658	0.00946031			4.89874	3.41051	0.696201	-0.522424
Inoc1	M400001655	ENSMUSG00000034154	XM_355376	0	Inoc1	INO80 complex homolog 1 (S. cerevisiae) [Source:MarkerSymbol;Acc:MGI:1915392]		GO:0000166(nucleotide binding);GO:0003676(nucleic acid binding);GO:0003677(DNA binding);GO:0004386(helicase activity);GO:0005524(ATP binding);GO:0016787(hydrolase activity)	GO:0005634(nucleus)	10.372	8.57192	0.826444	-0.275011			10.372	8.81008	0.849406	-0.235474
-	M400001636									167.036	110.969	0.664342	-0.590002			167.036	67.2641	0.402692	-1.31225		*
D430041D05Rik	M400001485	ENSMUSG00000032662	XM_141380	0	D430041D05Rik	RIKEN cDNA D430041D05 gene [Source:MarkerSymbol;Acc:MGI:2181743]				6.4926	5.7651	0.88795	-0.17145			6.4926	4.73801	0.729755	-0.454516
Tdgf1	M400001469									18.0767	14.9006	0.824301	-0.278757			18.0767	11.8904	0.657774	-0.604337
Gpm6b	M400001361									9.01039	4.64707	0.515746	-0.955269			9.01039	3.05618	0.339183	-1.55986		*
Rab39b	M400001347	ENSMUSG00000031202	NM_175122	67790	Rab39b	RAB39B, member RAS oncogene family [Source:MarkerSymbol;Acc:MGI:1915040]	GO:0006810(transport);GO:0006886(intracellular protein transport);GO:0007264(small GTPase mediated signal transduction);GO:0015031(protein transport)	GO:0000166(nucleotide binding);GO:0005525(GTP binding);GO:0008565(protein transporter activity)	GO:0005622(intracellular);GO:0016020(membrane)	12.9377	3.97107	0.306938	-1.70398		*	12.9377	23.0113	1.77863	0.830763
Mug4	M400001221	ENSMUSG00000030131;ENSMUSG00000030113;ENSMUSG00000059908		0	Mug4	murinoglobulin 4 [Source:MarkerSymbol;Acc:MGI:101843]	GO:0006810(transport)	GO:0004866(endopeptidase inhibitor activity);GO:0004867(serine-type endopeptidase inhibitor activity);GO:0004872(receptor activity);GO:0005215(transporter activity);GO:0017114(wide-spectrum protease inhibitor activity)	GO:0005615(extracellular space);GO:0016020(membrane)	10.1919	7.2868	0.714962	-0.484061			10.1919	8.65907	0.849606	-0.235134
Wrnip1	M400002682	ENSMUSG00000042874		78903	Wrnip1	Werner helicase interacting protein 1 [Source:MarkerSymbol;Acc:MGI:1926153]				41.5945	32.7343	0.786985	-0.345591			41.5945	27.5347	0.66198	-0.59514
1700028J19Rik	M200010107	ENSMUSG00000038782		0	1700028J19Rik	RIKEN cDNA 1700028J19 gene [Source:MarkerSymbol;Acc:MGI:1917254]		GO:0003676(nucleic acid binding)		21.6739	17.2579	0.796255	-0.328698			21.6739	21.8123	1.00639	0.00918284
-	M400001075									8.10892	6.5484	0.807555	-0.308368			8.10892	4.18111	0.515619	-0.955623
Fubp3	M400000965	ENSMUSG00000026843		0	Fubp3	far upstream element (FUSE) binding protein 3 [Source:MarkerSymbol;Acc:MGI:2443699]	GO:0045944(positive regulation of transcription from RNA polymerase II promoter)	GO:0003676(nucleic acid binding);GO:0003697(single-stranded DNA binding);GO:0016563(transcriptional activator activity)	GO:0005575(cellular_component)	158.904	114.958	0.723444	-0.467047			158.904	110.264	0.693901	-0.527199
Dclre1c	M400000951	ENSMUSG00000026648	NM_175683	227525	Dclre1c	DNA cross-link repair 1C, PSO2 homolog (S. cerevisiae) [Source:MarkerSymbol;Acc:MGI:2441769]	GO:0000723(telomere maintenance);GO:0006281(DNA repair);GO:0006302(double-strand break repair);GO:0006310(DNA recombination);GO:0006955(immune response);GO:0006974(response to DNA damage stimulus);GO:0007001(chromosome organization and biogenesis (sensu Eukaryota));GO:0010212(response to ionizing radiation);GO:0030183(B cell differentiation)	GO:0000014(single-stranded DNA specific endodeoxyribonuclease activity);GO:0000287(magnesium ion binding);GO:0004518(nuclease activity);GO:0004519(endonuclease activity);GO:0004527(exonuclease activity);GO:0008409(5'-3' exonuclease activity);GO:0016787(hydrolase activity)	GO:0005634(nucleus)	11.2498	14.1264	1.25571	0.328499			11.2498	8.24387	0.732804	-0.4485
Crisp3	M400000835	ENSMUSG00000025433		0	Crisp3	cysteine-rich secretory protein 3 [Source:MarkerSymbol;Acc:MGI:102552]			GO:0005576(extracellular region)	4.08429	1.67826	0.410907	-1.28311		*	4.08429
Pus7l	M200007545	ENSMUSG00000033356	NM_172437	78895	Pus7l	pseudouridylate synthase 7 homolog (S. cerevisiae)-like [Source:MarkerSymbol;Acc:MGI:1926145]	GO:0008033(tRNA processing)	GO:0004730(pseudouridylate synthase activity)		82.2751	54.4908	0.6623	-0.594443			82.2751	57.1724	0.694892	-0.525138
Rshl2	M400000679									359.525	450.01	1.25168	0.323863			359.525	232.284	0.646086	-0.630201
Ppig	M400002584	ENSMUSG00000042133		228005	Ppig	peptidyl-prolyl isomerase G (cyclophilin G) [Source:MarkerSymbol;Acc:MGI:2445173]	GO:0006457(protein folding)	GO:0003755(peptidyl-prolyl cis-trans isomerase activity);GO:0016853(isomerase activity)		93.6585	60.4176	0.645083	-0.632442			93.6585	95.6484	1.02125	0.0303305
Lats2	M400000530	ENSMUSG00000021959		50523	Lats2	large tumor suppressor 2 [Source:MarkerSymbol;Acc:MGI:1354386]	GO:0000082(G1/S transition of mitotic cell cycle);GO:0006468(protein amino acid phosphorylation);GO:0007049(cell cycle);GO:0007067(mitosis);GO:0007243(protein kinase cascade);GO:0009755(hormone-mediated signaling);GO:0045736(negative regulation of cyclin-dependent protein kinase activity);GO:0045786(negative regulation of progression through cell cycle);GO:0051301(cell division)	GO:0000166(nucleotide binding);GO:0000287(magnesium ion binding);GO:0004672(protein kinase activity);GO:0004674(protein serine/threonine kinase activity);GO:0005524(ATP binding);GO:0016301(kinase activity);GO:0016740(transferase activity);GO:0046872(metal ion binding)	GO:0000922(spindle pole);GO:0005634(nucleus)	84.0135	126.74	1.50856	0.593175			84.0135	97.4118	1.15948	0.213475
Ecd	M400000515	ENSMUSG00000021810	NM_027475	70601	Ecd	ecdysoneless homolog (Drosophila) [Source:MarkerSymbol;Acc:MGI:1917851]				113.817	111.545	0.980043	-0.0290824			113.817	102.53	0.900836	-0.150663
Adcy1	M400000387	ENSMUSG00000020431	XM_483980	432530	Adcy1	adenylate cyclase 1 [Source:MarkerSymbol;Acc:MGI:99677]	GO:0006171(cAMP biosynthetic process);GO:0007190(adenylate cyclase activation);GO:0007242(intracellular signaling cascade);GO:0009190(cyclic nucleotide biosynthetic process)	GO:0000287(magnesium ion binding);GO:0004016(adenylate cyclase activity);GO:0004383(guanylate cyclase activity);GO:0005516(calmodulin binding);GO:0016829(lyase activity);GO:0016849(phosphorus-oxygen lyase activity);GO:0046872(metal ion binding)	GO:0005886(plasma membrane);GO:0016020(membrane);GO:0016021(integral to membrane)	4.31103	3.69436	0.856956	-0.222707			4.31103	1.82278	0.422818	-1.24189		*
1700011E04Rik	M400000368									2.14298						2.14298	1.19891	0.559461	-0.837892
Ncf1	M400000244	ENSMUSG00000015950	NM_010876	0	Ncf1	neutrophil cytosolic factor 1 [Source:MarkerSymbol;Acc:MGI:97283]	GO:0006118(electron transport);GO:0006691(leukotriene metabolic process);GO:0006742(NADP catabolic process);GO:0006954(inflammatory response);GO:0006968(cellular defense response);GO:0007154(cell communication);GO:0008283(cell proliferation);GO:0009617(response to bacterium)	GO:0005515(protein binding);GO:0016175(superoxide-generating NADPH oxidase activity);GO:0035091(phosphoinositide binding)	GO:0005737(cytoplasm);GO:0005829(cytosol)	3.21913	4.98447	1.54839	0.630773			3.21913	3.4642	1.07613	0.105855
Gstk1	M200005538	ENSMUSG00000029864	NM_029555	76263	Gstk1	glutathione S-transferase kappa 1 [Source:MarkerSymbol;Acc:MGI:1923513]	GO:0006605(protein targeting);GO:0006749(glutathione metabolic process)	GO:0004364(glutathione transferase activity);GO:0004602(glutathione peroxidase activity);GO:0015035(protein disulfide oxidoreductase activity);GO:0016740(transferase activity)	GO:0005739(mitochondrion);GO:0005743(mitochondrial inner membrane);GO:0030288(outer membrane-bounded periplasmic space)	43.8928	40.7478	0.928349	-0.107261			43.8928	38.4859	0.876816	-0.189654
Apoa2	M400000108	ENSMUSG00000005681	NM_013474	0	Apoa2	apolipoprotein A-II [Source:MarkerSymbol;Acc:MGI:88050]	GO:0001817(regulation of cytokine production);GO:0006006(glucose metabolic process);GO:0006631(fatty acid metabolic process);GO:0006810(transport);GO:0006869(lipid transport);GO:0009749(response to glucose stimulus);GO:0015759(beta-glucoside transport);GO:0030300(regulation of cholesterol absorption);GO:0042119(neutrophil activation);GO:0042157(lipoprotein metabolic process);GO:0045416(positive r…	GO:0005319(lipid transporter activity);GO:0008289(lipid binding);GO:0046982(protein heterodimerization activity)	GO:0005576(extracellular region);GO:0005615(extracellular space)	4.90801	3.25063	0.66231	-0.594421			4.90801	2.99424	0.610071	-0.712951
Speer4b	M400003458	ENSMUSG00000048703	NM_028561	73526	Speer4b	spermatogenesis associated glutamate (E)-rich protein 4b [Source:MarkerSymbol;Acc:MGI:1920776]	GO:0008150(biological_process)	GO:0003674(molecular_function)	GO:0005575(cellular_component)	19.4429	16.5291	0.850135	-0.234236			19.4429	6.93789	0.356834	-1.48667		*
Pdha2	M400003330	ENSMUSG00000047674	NM_008811	18598	Pdha2	pyruvate dehydrogenase E1 alpha 2 [Source:MarkerSymbol;Acc:MGI:97533]	GO:0006096(glycolysis);GO:0008152(metabolic process)	GO:0004739(pyruvate dehydrogenase (acetyl-transferring) activity);GO:0016491(oxidoreductase activity);GO:0016624(oxidoreductase activity, acting on the aldehyde or oxo group of donors, disulfide as acceptor)	GO:0005615(extracellular space);GO:0005739(mitochondrion)	4.69288	3.40854	0.726322	-0.46132			4.69288	0.84458	0.17997	-2.47417		**
-	M400003314									281.581	212.894	0.756067	-0.403414			281.581	208.11	0.739075	-0.436207
Q8CEY4_MOUSE	M300014555	ENSMUSG00000043488		0	Q8CEY4_MOUSE	Adult male tongue cDNA, RIKEN full-length enriched library, clone:2310035N23 product:hypothetical protein, full insert sequence. (Fragment). [Source:Uniprot/SPTREMBL;Acc:Q8CEY4]				6.50612	6.10732	0.938705	-0.0912567			6.50612	5.52296	0.848887	-0.236355
-	M400003166									3725.04	3215.01	0.86308	-0.212433			3725.04	2737.48	0.734887	-0.444406
Sprrl1	M400003040	ENSMUSG00000045475;ENSMUSG00000043472	NM_033175	94060	Sprrl1	small proline rich-like 1 [Source:MarkerSymbol;Acc:MGI:2135932]	GO:0008150(biological_process)	GO:0003674(molecular_function)	GO:0005575(cellular_component)	43.5389	33.4002	0.767134	-0.382449			43.5389	51.8682	1.19131	0.252546
XR_003487.1	M400003005									49.0659	43.78	0.892269	-0.164449			49.0659	62.1734	1.26714	0.341578
AB041803	M400002903	ENSMUSG00000044471	NM_144555	0	AB041803	cDNA sequence AB041803 [Source:MarkerSymbol;Acc:MGI:2673128]				19.7554	21.0723	1.06666	0.0931011			19.7554	20.1815	1.02157	0.0307856
Neurog3	M400002884	ENSMUSG00000044312	NM_009719	11925	Neurog3	neurogenin 3 [Source:MarkerSymbol;Acc:MGI:893591]	GO:0006350(transcription);GO:0006355(regulation of transcription, DNA-dependent);GO:0007275(multicellular organismal development);GO:0007399(nervous system development);GO:0030154(cell differentiation);GO:0030855(epithelial cell differentiation);GO:0045449(regulation of transcription);GO:0045944(positive regulation of transcription from RNA polymerase II promoter)	GO:0003677(DNA binding);GO:0003700(transcription factor activity);GO:0030528(transcription regulator activity)	GO:0005634(nucleus)	4.40513	4.58779	1.04146	0.0586139			4.40513	2.34537	0.532419	-0.909367
-	M300009928									24.3253	21.1767	0.870562	-0.199981			24.3253	15.2745	0.627925	-0.671336
Pnpla1	M400002733	ENSMUSG00000043286	XM_484618	433091	Pnpla1	patatin-like phospholipase domain containing 1 [Source:MarkerSymbol;Acc:MGI:3617850]	GO:0006629(lipid metabolic process)			1.98978	3.35311	1.68517	0.75289			1.98978	1.15239	0.579156	-0.787977
Stab1	M400002608	ENSMUSG00000042286	NM_138672	192187	Stab1	stabilin 1 [Source:MarkerSymbol;Acc:MGI:2178742]	GO:0006898(receptor-mediated endocytosis);GO:0006954(inflammatory response);GO:0007155(cell adhesion);GO:0007267(cell-cell signaling);GO:0016525(negative regulation of angiogenesis);GO:0042742(defense response to bacterium)	GO:0004872(receptor activity);GO:0005041(low-density lipoprotein receptor activity);GO:0005044(scavenger receptor activity);GO:0005515(protein binding);GO:0005540(hyaluronic acid binding);GO:0008367(bacterial binding);GO:0015035(protein disulfide oxidoreductase activity)	GO:0005737(cytoplasm);GO:0005887(integral to plasma membrane);GO:0016020(membrane);GO:0016021(integral to membrane)	9.08072	10.8649	1.19648	0.258796			9.08072	7.78108	0.856879	-0.222837
Lyn	M400002593	ENSMUSG00000042228	NM_010747	17096	Lyn	Yamaguchi sarcoma viral (v-yes-1) oncogene homolog [Source:MarkerSymbol;Acc:MGI:96892]	GO:0006468(protein amino acid phosphorylation);GO:0007242(intracellular signaling cascade);GO:0008284(positive regulation of cell proliferation);GO:0009725(response to hormone stimulus);GO:0018108(peptidyl-tyrosine phosphorylation);GO:0030218(erythrocyte differentiation);GO:0042531(positive regulation of tyrosine phosphorylation of STAT protein);GO:0042541(hemoglobin biosynthetic process);GO:0046…	GO:0000166(nucleotide binding);GO:0004672(protein kinase activity);GO:0004713(protein-tyrosine kinase activity);GO:0005128(erythropoietin receptor binding);GO:0005515(protein binding);GO:0005524(ATP binding);GO:0016301(kinase activity);GO:0016740(transferase activity)	GO:0005634(nucleus);GO:0005737(cytoplasm)	35.1637	30.9361	0.879773	-0.184796			35.1637	29.0999	0.827554	-0.273075
-	M400002462										1.39561						0.837404
Phf11	M400002930	ENSMUSG00000044703	NM_172603	628693	Phf11	PHD finger protein 11 [Source:MarkerSymbol;Acc:MGI:1918441]	GO:0030655(beta-lactam antibiotic catabolic process);GO:0046677(response to antibiotic)	GO:0008800(beta-lactamase activity)		3.99629	4.25735	1.06532	0.091293			3.99629	2.83422	0.709213	-0.495708
Heca	M400002306									13.5575	12.106	0.892941	-0.163364			13.5575	11.918	0.87907	-0.185949
BC048651	M400002290									20.5544	16.4239	0.799049	-0.323645			20.5544	58.4676	2.84454	1.50819	*
1110054O05Rik	M400002150	ENSMUSG00000038544	XM_485388	66209	1110054O05Rik	RIKEN cDNA 1110054O05 gene [Source:MarkerSymbol;Acc:MGI:1913459]				68.3407	48.0263	0.702749	-0.50892			68.3407	48.9121	0.71571	-0.482553
Usp5	M400002134	ENSMUSG00000038429	NM_013700	22225	Usp5	ubiquitin specific peptidase 5 (isopeptidase T) [Source:MarkerSymbol;Acc:MGI:1347343]	GO:0006511(ubiquitin-dependent protein catabolic process);GO:0006512(ubiquitin cycle)	GO:0004221(ubiquitin thiolesterase activity);GO:0005515(protein binding);GO:0008233(peptidase activity);GO:0008234(cysteine-type peptidase activity);GO:0008270(zinc ion binding);GO:0016787(hydrolase activity);GO:0046872(metal ion binding)		366.11	290.92	0.794626	-0.331653			366.11	350.089	0.956239	-0.0645569
4932438A13Rik	M400001997	ENSMUSG00000037291		0	4932438A13Rik	RIKEN cDNA 4932438A13 gene [Source:MarkerSymbol;Acc:MGI:2444631]				14.2332	17.0266	1.19625	0.258523			14.2332	16.0307	1.12629	0.171576
-	M400001975									28.0612	20.2358	0.721131	-0.471667			28.0612	23.3878	0.833456	-0.262821
1810020D17Rik	M400001829	ENSMUSG00000035642	NM_183251	0	1810020D17Rik	RIKEN cDNA 1810020D17 gene [Source:MarkerSymbol;Acc:MGI:1913523]				84.2411	641.243	7.612	2.92828	**		84.2411	37.0024	0.439244	-1.18691		*
-	M400002793									2.63239	2.96509	1.12638	0.1717			2.63239	1.67498	0.636296	-0.652229
Naaladl1	M400005010	ENSMUSG00000054999	XM_355137	381204	Naaladl1	N-acetylated alpha-linked acidic dipeptidase-like 1 [Source:MarkerSymbol;Acc:MGI:2685810]	GO:0006508(proteolysis)	GO:0003824(catalytic activity);GO:0004180(carboxypeptidase activity);GO:0008233(peptidase activity);GO:0008237(metallopeptidase activity);GO:0008270(zinc ion binding);GO:0016787(hydrolase activity);GO:0016805(dipeptidase activity);GO:0043275(glutamate carboxypeptidase II activity);GO:0046872(metal ion binding)	GO:0016020(membrane);GO:0016021(integral to membrane)	7.579	6.77188	0.893506	-0.162451			7.579	3.86719	0.510251	-0.970721
5330416C01Rik	M400004991	ENSMUSG00000054944	NM_207528	0	5330416C01Rik	RIKEN cDNA 5330416C01 gene [Source:MarkerSymbol;Acc:MGI:2685378]				9.12537	7.61485	0.834471	-0.261067			9.12537	7.12504	0.780794	-0.356986
-	M400004862									5.32715	4.87027	0.914235	-0.129362			5.32715	2.44559	0.45908	-1.12318		*
Olfr1500	M400004846	ENSMUSG00000054526		258097	Olfr1500	olfactory receptor 1500 [Source:MarkerSymbol;Acc:MGI:3031334]	GO:0007165(signal transduction);GO:0007186(G-protein coupled receptor protein signaling pathway);GO:0007608(sensory perception of smell);GO:0050896(response to stimulus)	GO:0004871(signal transducer activity);GO:0004872(receptor activity);GO:0004930(G-protein coupled receptor activity);GO:0004984(olfactory receptor activity)	GO:0016020(membrane);GO:0016021(integral to membrane)	3.8794	3.4702	0.894519	-0.160815			3.8794	0.682427	0.17591	-2.50709		**
Q8C3P5_MOUSE	M400004731									12.1886	11.0917	0.910007	-0.136051			12.1886	10.2003	0.836873	-0.256919
Frat2	M400003320	ENSMUSG00000047604	NM_177603	212398	Frat2	frequently rearranged in advanced T-cell lymphomas 2 [Source:MarkerSymbol;Acc:MGI:2673967]	GO:0016055(Wnt receptor signaling pathway)			15.9626	11.7153	0.733923	-0.446299			15.9626	13.8661	0.868663	-0.203131
Q8C4H4_MOUSE	M400004597									3.28433	4.64254	1.41354	0.499315			3.28433	2.76882	0.84304	-0.246327
-	M400004581									2.39442	2.62598	1.09671	0.133181			2.39442	0.488108	0.203852	-2.2944		**
Mapk14	M400004468	ENSMUSG00000053436	NM_011951	26416	Mapk14	mitogen activated protein kinase 14 [Source:MarkerSymbol;Acc:MGI:1346865]	GO:0000077(DNA damage checkpoint);GO:0001525(angiogenesis);GO:0006006(glucose metabolic process);GO:0006468(protein amino acid phosphorylation);GO:0006928(cell motility);GO:0006935(chemotaxis);GO:0006950(response to stress);GO:0007166(cell surface receptor linked signal transduction);GO:0007243(protein kinase cascade);GO:0007519(striated muscle development);GO:0019395(fatty acid oxidation);GO:003…	GO:0000166(nucleotide binding);GO:0004672(protein kinase activity);GO:0004674(protein serine/threonine kinase activity);GO:0004707(MAP kinase activity);GO:0004708(MAP kinase kinase activity);GO:0005515(protein binding);GO:0005524(ATP binding);GO:0008339(MP kinase activity);GO:0016301(kinase activity);GO:0016740(transferase activity)	GO:0000922(spindle pole);GO:0005623(cell);GO:0005634(nucleus);GO:0005737(cytoplasm)	85.9668	68.2027	0.793361	-0.333951			85.9668	56.1529	0.653193	-0.614418
Atp6v1e2	M400004449	ENSMUSG00000053375	NM_029121	74915	Atp6v1e2	ATPase, H+ transporting, lysosomal V1 subunit E2 [Source:MarkerSymbol;Acc:MGI:1922165]	GO:0015986(ATP synthesis coupled proton transport);GO:0015991(ATP hydrolysis coupled proton transport)	GO:0008553(hydrogen-exporting ATPase activity, phosphorylative mechanism);GO:0046933(hydrogen ion transporting ATP synthase activity, rotational mechanism);GO:0046961(hydrogen ion transporting ATPase activity, rotational mechanism)	GO:0001669(acrosome);GO:0005753(mitochondrial proton-transporting ATP synthase complex);GO:0016469(proton-transporting two-sector ATPase complex)	42.5938	34.465	0.809155	-0.305511			42.5938	23.8234	0.559317	-0.838263
Tnks	M400004326	ENSMUSG00000053051	NM_175322	0	Tnks	tankyrase, TRF1-interacting ankyrin-related ADP-ribose polymerase [Source:MarkerSymbol;Acc:MGI:1341087]				97.8964	98.8809	1.01006	0.0144365			97.8964	50.9442	0.520389	-0.942337
Q8CC74_MOUSE	M400004311									3.71786	3.85947	1.03809	0.0539295			3.71786	0.950898	0.255765	-1.96711		*
4933424C13Rik	M400004195									8.08003	6.66334	0.824668	-0.278115			8.08003	2.22974	0.275957	-1.85748		*
Mbtps2	M400003215	ENSMUSG00000046873	NM_172307	0	Mbtps2	membrane-bound transcription factor peptidase, site 2 [Source:MarkerSymbol;Acc:MGI:2444506]	GO:0006508(proteolysis);GO:0006629(lipid metabolic process);GO:0008202(steroid metabolic process);GO:0008203(cholesterol metabolic process)	GO:0003676(nucleic acid binding);GO:0004222(metalloendopeptidase activity);GO:0005515(protein binding);GO:0008233(peptidase activity);GO:0008237(metallopeptidase activity);GO:0008270(zinc ion binding);GO:0016787(hydrolase activity);GO:0046872(metal ion binding)	GO:0005622(intracellular);GO:0016020(membrane);GO:0016021(integral to membrane)	14.5148	13.1574	0.906481	-0.141652			14.5148	6.59313	0.454234	-1.13849		*
XP_001000770.1	M400004054									37.7662	33.1221	0.877029	-0.189304			37.7662	44.0687	1.16688	0.222656
XP_920351.1	M400004034									2669.76	2814.01	1.05403	0.0759148			2669.76	2747.6	1.02915	0.0414575
-	M400003904									10174.3	12204.1	1.1995	0.262437			10174.3	7078.64	0.69574	-0.523379
-	M400003883									49.839	52.4188	1.05176	0.0728097			49.839	58.3725	1.17122	0.228014
Pddc1	M400003764	ENSMUSG00000051007		213350	Pddc1	Parkinson disease 7 domain containing 1 [Source:MarkerSymbol;Acc:MGI:2387178]				75.2355	76.8032	1.02084	0.029753			75.2355	29.2344	0.388572	-1.36375		*
Tatdn1	M400003750									38.0602	34.6385	0.910098	-0.135906			38.0602	32.1661	0.845138	-0.242741
2610318N02Rik	M400003622	ENSMUSG00000073554;ENSMUSG00000049916		629292	2610318N02Rik	RIKEN cDNA 2610318N02 gene [Source:MarkerSymbol;Acc:MGI:1917708]				16.0776	8.06697	0.501752	-0.994953			16.0776	27.311	1.6987	0.764428
XP_897768.1	M400003159									13.5832	13.6291	1.00338	0.00487019			13.5832	16.829	1.23895	0.309122
Depdc2	M400003482	ENSMUSG00000048960		109294	Depdc2	DEP domain containing 2 [Source:MarkerSymbol;Acc:MGI:1923385]				3.30204	3.69844	1.12005	0.163561			3.30204	1.97058	0.596778	-0.744734
XP_141707.4	M400007018									5022.7	5316.27	1.05845	0.081951			5022.7	3100.5	0.617297	-0.695963
-	M400006862									5.73081	5.53811	0.966374	-0.0493457			5.73081	2.02428	0.353227	-1.50133		*
Olfr415	M400006831	ENSMUSG00000066672;ENSMUSG00000059503	NM_146714	258709	Olfr415	olfactory receptor 415 [Source:MarkerSymbol;Acc:MGI:3030249]	GO:0007165(signal transduction);GO:0007186(G-protein coupled receptor protein signaling pathway);GO:0007608(sensory perception of smell);GO:0050896(response to stimulus)	GO:0004871(signal transducer activity);GO:0004872(receptor activity);GO:0004930(G-protein coupled receptor activity);GO:0004984(olfactory receptor activity)	GO:0016020(membrane);GO:0016021(integral to membrane)	6.98206	3.53068	0.505678	-0.983709			6.98206	2.74836	0.393632	-1.34508		*
-	M400006675									495.446	605.343	1.22181	0.289026			495.446	369.84	0.74648	-0.421825
Olfr1504	M400006646	ENSMUSG00000057270;ENSMUSG00000059105	NM_146634	258627	Olfr1504	olfactory receptor 1504 [Source:MarkerSymbol;Acc:MGI:3031338]	GO:0007165(signal transduction);GO:0007186(G-protein coupled receptor protein signaling pathway);GO:0007608(sensory perception of smell);GO:0050896(response to stimulus)	GO:0004871(signal transducer activity);GO:0004872(receptor activity);GO:0004930(G-protein coupled receptor activity);GO:0004984(olfactory receptor activity)	GO:0016020(membrane);GO:0016021(integral to membrane)	31.8003	28.8663	0.907736	-0.139655			31.8003	29.652	0.932445	-0.100909
Q8BQP4_MOUSE	M400006468									85.2548	73.0879	0.857288	-0.222148			85.2548	63.746	0.747712	-0.419446
-	M400006445									5.64794	6.54817	1.15939	0.213367			5.64794	8.58385	1.51982	0.603899
-	M400006281									4.37721	5.20501	1.18912	0.249889			4.37721	1.72975	0.395171	-1.33945		*
Idi1	M400006262	ENSMUSG00000070508;ENSMUSG00000058258;ENSMUSG00000044232	NM_145360;NM_177960	0	Idi1	isopentenyl-diphosphate delta isomerase [Source:MarkerSymbol;Acc:MGI:2442264]	GO:0006694(steroid biosynthetic process);GO:0006695(cholesterol biosynthetic process);GO:0008299(isoprenoid biosynthetic process);GO:0008610(lipid biosynthetic process);GO:0016117(carotenoid biosynthetic process);GO:0016126(sterol biosynthetic process)	GO:0000287(magnesium ion binding);GO:0004452(isopentenyl-diphosphate delta-isomerase activity);GO:0016787(hydrolase activity);GO:0016853(isomerase activity)	GO:0005777(peroxisome)	682.809	689.317	1.00953	0.0136843			682.809	448.642	0.657054	-0.605917
A230042K10Rik	M400006095	ENSMUSG00000057842	NM_177622	218314	A230042K10Rik	RIKEN cDNA A030001O10 gene [Source:MarkerSymbol;Acc:MGI:3040707]	GO:0006355(regulation of transcription, DNA-dependent)	GO:0003676(nucleic acid binding);GO:0005515(protein binding);GO:0008270(zinc ion binding);GO:0046872(metal ion binding)	GO:0005622(intracellular);GO:0005634(nucleus)	17.8085	14.0057	0.786461	-0.346552			17.8085	10.7178	0.601837	-0.732556
-	M400006076									4.35251	2.18009	0.500882	-0.997458			4.35251
Olfr138	M400005923	ENSMUSG00000057443	NM_130868	170648	Olfr138	olfactory receptor 138 [Source:MarkerSymbol;Acc:MGI:2177521]	GO:0007165(signal transduction);GO:0007186(G-protein coupled receptor protein signaling pathway);GO:0007608(sensory perception of smell);GO:0050896(response to stimulus)	GO:0004871(signal transducer activity);GO:0004872(receptor activity);GO:0004930(G-protein coupled receptor activity);GO:0004984(olfactory receptor activity)	GO:0016020(membrane);GO:0016021(integral to membrane)	2.19886	2.34645	1.06712	0.0937218			2.19886
XP_921239.1	M400005904									137.145	73.6559	0.537065	-0.896832			137.145	123.135	0.897842	-0.155467
Olfr799	M400005729	ENSMUSG00000057002;ENSMUSG00000059787	NM_146927	258929	Olfr799	olfactory receptor 799 [Source:MarkerSymbol;Acc:MGI:3030633]	GO:0007165(signal transduction);GO:0007186(G-protein coupled receptor protein signaling pathway);GO:0007608(sensory perception of smell);GO:0050896(response to stimulus)	GO:0004871(signal transducer activity);GO:0004872(receptor activity);GO:0004930(G-protein coupled receptor activity);GO:0004984(olfactory receptor activity)	GO:0016020(membrane);GO:0016021(integral to membrane)	2.06108	3.13184	1.51951	0.603604			2.06108	0.622627	0.302087	-1.72696		*
Tas2r113	M400005695	ENSMUSG00000056926	NM_207018	100044408	Tas2r113	taste receptor, type 2, member 113 [Source:MarkerSymbol;Acc:MGI:2681217]	GO:0007165(signal transduction);GO:0007186(G-protein coupled receptor protein signaling pathway);GO:0050896(response to stimulus);GO:0050909(sensory perception of taste)	GO:0004871(signal transducer activity);GO:0004872(receptor activity);GO:0004930(G-protein coupled receptor activity)	GO:0016020(membrane);GO:0016021(integral to membrane)		2.46207
Lrrc48	M400005558	ENSMUSG00000056598	NM_029044	0	Lrrc48	leucine rich repeat containing 48 [Source:MarkerSymbol;Acc:MGI:1921915]		GO:0005515(protein binding)	GO:0005737(cytoplasm)	5.42954	4.42149	0.814339	-0.296298			5.42954	2.74012	0.504668	-0.986593
Il17d	M400003663	ENSMUSG00000050222	NM_145837	239114	Il17d	interleukin 17D [Source:MarkerSymbol;Acc:MGI:2446510]	GO:0006954(inflammatory response)	GO:0005125(cytokine activity)	GO:0005576(extracellular region)	3.88775	3.69289	0.949879	-0.0741837			3.88775
Cndp1	M400005420	ENSMUSG00000056162	NM_177450	338403	Cndp1	carnosine dipeptidase 1 (metallopeptidase M20 family) [Source:MarkerSymbol;Acc:MGI:2451097]	GO:0006508(proteolysis)	GO:0004180(carboxypeptidase activity);GO:0008233(peptidase activity);GO:0008237(metallopeptidase activity);GO:0016787(hydrolase activity);GO:0016805(dipeptidase activity);GO:0046983(protein dimerization activity)	GO:0005829(cytosol)	5.10265	4.14167	0.811671	-0.301033			5.10265	1.76191	0.345294	-1.5341		*
Tas2r134	M400005404	ENSMUSG00000056115	NM_199158	387511	Tas2r134	taste receptor, type 2, member 134 [Source:MarkerSymbol;Acc:MGI:2681300]	GO:0001580(detection of chemical stimulus during sensory perception of bitter taste);GO:0007165(signal transduction);GO:0007186(G-protein coupled receptor protein signaling pathway);GO:0050896(response to stimulus);GO:0050909(sensory perception of taste)	GO:0004871(signal transducer activity);GO:0004872(receptor activity);GO:0004930(G-protein coupled receptor activity);GO:0008527(taste receptor activity)	GO:0016020(membrane);GO:0016021(integral to membrane)	10.7614	8.23638	0.765367	-0.385777			10.7614	9.25134	0.859682	-0.218126
Q8C683_MOUSE	M400005300									6.52252	6.10517	0.936015	-0.0953972			6.52252	7.16438	1.09841	0.135413
Ldoc1l	M400005279	ENSMUSG00000055745	NM_177630	223732	Ldoc1l	leucine zipper, down-regulated in cancer 1-like [Source:MarkerSymbol;Acc:MGI:2675858]				4.90895	4.52901	0.922604	-0.116217			4.90895	2.74119	0.558407	-0.840612
1110020C17Rik	M400005157	ENSMUSG00000055404		0	1110020C17Rik	RIKEN cDNA 1110020C17 gene [Source:MarkerSymbol;Acc:MGI:1915834]				2.46475	2.12177	0.860848	-0.21617			2.46475	0.649191	0.26339	-1.92473		*
Zfp457	M400005133	ENSMUSG00000055341;ENSMUSG00000055480;ENSMUSG00000057396;ENSMUSG00000056552	NM_001003666	0	Zfp457	zinc finger protein 457 [Source:MarkerSymbol;Acc:MGI:2664334]	GO:0006355(regulation of transcription, DNA-dependent)	GO:0003676(nucleic acid binding);GO:0008270(zinc ion binding);GO:0046872(metal ion binding)	GO:0005622(intracellular)	26.1115	24.5443	0.939983	-0.0892935			26.1115	23.3338	0.893621	-0.162265
-	M400009947									5.50221	2.85083	0.518124	-0.94863			5.50221	3.00141	0.545493	-0.874368
-	M400009779									2864.05	1900.78	0.663669	-0.591463			2864.05	1346.35	0.470087	-1.089		*
-	M400009499									269.347	282.871	1.05021	0.0706761			269.347	422.577	1.56889	0.649748
-	M400009424									4.65242	3.41426	0.733867	-0.446409			4.65242	1.46845	0.315632	-1.66369		*
Plp2	M400008905	ENSMUSG00000057762;ENSMUSG00000075274		0	Plp2	proteolipid protein 2 [Source:MarkerSymbol;Acc:MGI:1298382]				3212.26	2096.69	0.652716	-0.615472			3212.26	1290.6	0.401773	-1.31555		*
-	M400008865									5644.6	3970.9	0.703486	-0.507405			5644.6	3657.75	0.648009	-0.625915
XP_204404.1	M400008561									2.75953	1.39606	0.505906	-0.983059			2.75953
BC048507	M400008535	ENSMUSG00000064063		408058	BC048507	cDNA sequence BC048507 [Source:MarkerSymbol;Acc:MGI:3040680]	GO:0007017(microtubule-based process)	GO:0003777(microtubule motor activity)	GO:0005875(microtubule associated complex)	2.12112	3.13019	1.47573	0.561428			2.12112	1.045	0.492667	-1.02131		*
5033405K12Rik	M400008359									4.93085	4.48485	0.909549	-0.136776			4.93085	2.98813	0.606007	-0.722594
NP_001013842.1	M400008336									3.58555	3.80642	1.0616	0.0862395			3.58555	1.25261	0.349348	-1.51726		*
Olfr535	M400008163	ENSMUSG00000063230	NM_146954	258956	Olfr535	olfactory receptor 535 [Source:MarkerSymbol;Acc:MGI:3030369]	GO:0007165(signal transduction);GO:0007186(G-protein coupled receptor protein signaling pathway);GO:0007608(sensory perception of smell);GO:0050896(response to stimulus)	GO:0004871(signal transducer activity);GO:0004872(receptor activity);GO:0004930(G-protein coupled receptor activity);GO:0004984(olfactory receptor activity)	GO:0016020(membrane);GO:0016021(integral to membrane)	10.9508	10.3015	0.940706	-0.0881836			10.9508	9.02775	0.824394	-0.278594
XP_889644.1	M400008141									5988.42	8201.36	1.36954	0.453688			5988.42	5927.66	0.989853	-0.014714
Gm382	M400007989	ENSMUSG00000062791	XM_142112	211208	Gm382	gene model 382, (NCBI) [Source:MarkerSymbol;Acc:MGI:2685228]		GO:0003723(RNA binding)		2.31672	3.13042	1.35123	0.434269			2.31672
Hist1h2bk	M400007964	=HYPERLINK("http://uswest.ensembl.org/Mus_musculus/Gene/Summary?g=ENSMUSG00000047246;ENSMUSG00000069314;ENSMUSG00000058854;ENSMUSG00000069268;ENSMUSG00000069300;ENSMUSG00000069271;ENSMUSG00000058189;ENSMUSG00000069308;ENSMUSG00000058385;ENSMUSG00000050799	NM_175665	0	Hist1h2bk	histone cluster 1, H2bk [Source:MarkerSymbol;Acc:MGI:2448399]	GO:0006334(nucleosome assembly);GO:0007001(chromosome organization and biogenesis (sensu Eukaryota))	GO:0003677(DNA binding)	GO:0000786(nucleosome);GO:0005634(nucleus);GO:0005694(chromosome)	83.8141	115.587	1.37909	0.463718			83.8141	80.9399	0.965707	-0.0503429
Q8C4K5_MOUSE	M400007782									18.7225	24.9948	1.33501	0.41685			18.7225	19.9417	1.06512	0.0910132
XP_987148.1	M400007761									3818.5	5307.05	1.38983	0.474906			3818.5	2519.94	0.65993	-0.599616
-	M400007622									5.44823	5.09415	0.935009	-0.0969475			5.44823	4.62344	0.848614	-0.23682
Dsg1b	M400007601	ENSMUSG00000061928	NM_181682	225256	Dsg1b	desmoglein 1 beta [Source:MarkerSymbol;Acc:MGI:2664357]	GO:0007155(cell adhesion);GO:0007156(homophilic cell adhesion)	GO:0005509(calcium ion binding);GO:0005515(protein binding)	GO:0005856(cytoskeleton);GO:0016020(membrane);GO:0016021(integral to membrane);GO:0030057(desmosome)	6.75024	4.64899	0.688716	-0.53802			6.75024	2.45837	0.364189	-1.45724		*
-	M400007392									1471.38	1682.84	1.14371	0.193725			1471.38	1021.53	0.694267	-0.526437
Efcab4b	M400007375	ENSMUSG00000061414	XM_355814	381812	Efcab4b	EF-hand calcium binding domain 4B [Source:MarkerSymbol;Acc:MGI:2685919]		GO:0005509(calcium ion binding)		17.2543	18.8952	1.0951	0.131066			17.2543	24.8431	1.43982	0.525891
Dcc	M400007256	ENSMUSG00000060534	NM_007831	0	Dcc	deleted in colorectal carcinoma [Source:MarkerSymbol;Acc:MGI:94869]	GO:0001764(neuron migration);GO:0006915(apoptosis);GO:0007049(cell cycle);GO:0007275(multicellular organismal development);GO:0045786(negative regulation of progression through cell cycle)	GO:0004872(receptor activity)	GO:0005615(extracellular space);GO:0016020(membrane);GO:0016021(integral to membrane);GO:0030424(axon)	4.71758	4.70154	0.9966	-0.0049141			4.71758	2.85361	0.604889	-0.725258
Cyp2a12	M400007238	ENSMUSG00000060407	NM_133657	233005	Cyp2a12	cytochrome P450, family 2, subfamily a, polypeptide 12 [Source:MarkerSymbol;Acc:MGI:105055]	GO:0006118(electron transport)	GO:0004497(monooxygenase activity);GO:0005506(iron ion binding);GO:0016491(oxidoreductase activity);GO:0016712(oxidoreductase activity, acting on paired donors, with incorporation or reduction of molecular oxygen, reduced flavin or flavopr);GO:0020037(heme binding);GO:0046872(metal ion binding);GO:0050381(unspecific monooxygenase activity)	GO:0005615(extracellular space);GO:0005783(endoplasmic reticulum);GO:0005792(microsome);GO:0016020(membrane)	7.77041	4.86953	0.626676	-0.674208			7.77041	4.2574	0.547899	-0.868018
Hnt	M400007041	ENSMUSG00000059974	NM_172290	235106	Hnt	neurotrimin [Source:MarkerSymbol;Acc:MGI:2446259]	GO:0007155(cell adhesion)	GO:0005515(protein binding);GO:0048503(GPI anchor binding)	GO:0016020(membrane);GO:0016021(integral to membrane)	62.6871	56.8916	0.907549	-0.139952			62.6871	56.0269	0.893756	-0.162048
-	M400012276									2.78144						2.78144
-	M400012153									8.38515	6.27532	0.748384	-0.418149			8.38515	3.8733	0.461923	-1.11428		*
-	M400012139									31.9195	25.0567	0.784995	-0.349245			31.9195	23.043	0.721909	-0.47011
-	M400012052									16.8557	15.3527	0.910833	-0.134742			16.8557	14.9954	0.889631	-0.168721
-	M400012039									2.51131	2.2922	0.912753	-0.131704			2.51131	1.25367	0.499212	-1.00228		*
-	M400011952									3.20375	2.68572	0.838306	-0.254451			3.20375	2.44666	0.763686	-0.388949
-	M400011939									5.07244	4.59334	0.905548	-0.143137			5.07244	3.61918	0.713499	-0.487018
-	M400011772									53.6349	61.943	1.1549	0.207771			53.6349	14.8178	0.276272	-1.85584		*
-	M400011749									10.8646	11.4358	1.05257	0.0739185			10.8646	3.24943	0.299083	-1.74138		*
-	M400011629									5.38816	5.93672	1.10181	0.139876			5.38816	4.0211	0.746285	-0.422202
-	M400011608									3.32767	2.40686	0.723288	-0.467358			3.32767	0.78264	0.235192	-2.08809		**
-	M400011481									5.55575	8.17999	1.47235	0.558117			5.55575	5.14603	0.926253	-0.110522
-	M400011469									59.041	121.843	2.06371	1.04524	*		59.041	31.009	0.525211	-0.92903
-	M400011326									74.3642	56.1594	0.755195	-0.40508			74.3642	59.834	0.804607	-0.313643
-	M400011313									81.8002	99.325	1.21424	0.280054			81.8002	65.1394	0.796324	-0.328572
-	M400011179									2.06943	2.34905	1.13512	0.182845			2.06943	0.535696	0.258862	-1.94975		*
-	M400011160									100.966	53.5882	0.530756	-0.91388			100.966	13.2848	0.131577	-2.92602		**
-	M400011030									6.63233	7.79123	1.17474	0.232336			6.63233	5.86294	0.883995	-0.17789
-	M400011007									251.442	192.872	0.767064	-0.382582			251.442	227.617	0.90525	-0.143612
-	M400010865									16.4761	17.427	1.05771	0.0809486			16.4761	27.7163	1.68221	0.750355
-	M400010846									386.357	496.099	1.28404	0.360695			386.357	167.189	0.432731	-1.20846		*
-	M400010728									74.8508	72.469	0.968179	-0.0466544			74.8508	72.5618	0.969419	-0.0448073
-	M400010711									5.36117	3.63576	0.678166	-0.56029			5.36117	2.89509	0.540012	-0.888937
-	M400015385									3.07427	2.51246	0.817253	-0.291146			3.07427
-	M400015347									4.63993	3.80279	0.81958	-0.287043			4.63993	2.5519	0.549988	-0.862528
-	M400015046									324.537	335.799	1.0347	0.0492177			324.537	349.168	1.0759	0.105541
-	M400015008									3.78819	2.01476	0.531853	-0.9109			3.78819
-	M400014631									2.82376	4.2026	1.4883	0.573663			2.82376
-	M400014592									8.39159	8.56761	1.02098	0.0299491			8.39159	8.30581	0.989777	-0.0148245
-	M400014293									30.994	23.931	0.772117	-0.373108			30.994	12.8592	0.414895	-1.26918		*
-	M400014254									251.121	186.322	0.741961	-0.430585			251.121	261.877	1.04283	0.0605059
-	M400013933									7.03697	7.00244	0.995094	-0.00709542			7.03697	19.4768	2.76778	1.46873	*
-	M400013896									3.08784	2.63102	0.852061	-0.230971			3.08784	0.736122	0.238394	-2.06858		**
-	M400013634									3.08364	1.73517	0.562701	-0.829559			3.08364	0.434414	0.140877	-2.82749		**
-	M400013589									5.00118	6.49444	1.29858	0.376936			5.00118	3.06839	0.613533	-0.704788
-	M400013300									33.6443	51.0592	1.51762	0.601807			33.6443	6.32573	0.188018	-2.41106		**
-	M400013281									8.42561	10.3057	1.22314	0.29059			8.42561	4.20874	0.499518	-1.00139		*
-	M400013049									2.6934	2.06374	0.766219	-0.384171			2.6934	0.883922	0.328181	-1.60744		*
-	M400013007									121.947	239.169	1.96125	0.971777			121.947	100.741	0.826107	-0.2756
-	M400012672									6.09406	6.89152	1.13086	0.177418			6.09406	4.34326	0.712704	-0.488625
-	M400012657									6.29992	7.16613	1.1375	0.185861			6.29992	4.66436	0.740383	-0.433656
-	M400012539									37.4786	52.4033	1.39822	0.48359			37.4786	1.56149	0.0416634	-4.58507		***
-	M400012518									74.1896	84.3561	1.13703	0.185276			74.1896	53.4206	0.720056	-0.473819
-	M400012401									94.0633	92.5435	0.983843	-0.0235003			94.0633	65.2995	0.694208	-0.526561
-	M400012390									5.8291	5.15173	0.883795	-0.178217			5.8291	8.18407	1.404	0.489544
-	M400012292									2.91921	3.0174	1.03364	0.0477273			2.91921	1.03783	0.355517	-1.49201		*
Npy6r	M200014984	ENSMUSG00000038071	NM_010935	18169	Npy6r	neuropeptide Y receptor Y6 [Source:MarkerSymbol;Acc:MGI:1098590]	GO:0007165(signal transduction);GO:0007186(G-protein coupled receptor protein signaling pathway);GO:0007218(neuropeptide signaling pathway)	GO:0001584(rhodopsin-like receptor activity);GO:0001601(peptide YY receptor activity);GO:0004871(signal transducer activity);GO:0004872(receptor activity);GO:0004930(G-protein coupled receptor activity);GO:0004983(neuropeptide Y receptor activity)	GO:0016020(membrane);GO:0016021(integral to membrane)	56.2513	61.0389	1.08511	0.117841			56.2513	41.9022	0.74491	-0.424861
Agtrl1	M300015362	ENSMUSG00000044338	NM_011784	23796	Agtrl1	angiotensin receptor-like 1 [Source:MarkerSymbol;Acc:MGI:1346086]	GO:0007165(signal transduction);GO:0007186(G-protein coupled receptor protein signaling pathway)	GO:0001584(rhodopsin-like receptor activity);GO:0004871(signal transducer activity);GO:0004872(receptor activity);GO:0004930(G-protein coupled receptor activity)	GO:0016020(membrane);GO:0016021(integral to membrane)	9.5898	8.8582	0.92371	-0.114488			9.5898	8.79409	0.917025	-0.124967
Opn4	M200008584	ENSMUSG00000021799	NM_013887	30044	Opn4	opsin 4 (melanopsin) [Source:MarkerSymbol;Acc:MGI:1353425]	GO:0007165(signal transduction);GO:0007186(G-protein coupled receptor protein signaling pathway);GO:0007601(visual perception);GO:0007602(phototransduction);GO:0018298(protein-chromophore linkage);GO:0042752(regulation of circadian rhythm);GO:0048511(rhythmic process);GO:0050896(response to stimulus)	GO:0001584(rhodopsin-like receptor activity);GO:0004871(signal transducer activity);GO:0004872(receptor activity);GO:0004930(G-protein coupled receptor activity);GO:0005502(11(cis retinal binding);GO:0008020(G-protein coupled photoreceptor activity)	GO:0016020(membrane);GO:0016021(integral to membrane)	11.8789	8.79365	0.740272	-0.433872			11.8789	6.21727	0.523386	-0.934052
Htr1b	M200014906	ENSMUSG00000049511	NM_010482	15551	Htr1b	5-hydroxytryptamine (serotonin) receptor 1B [Source:MarkerSymbol;Acc:MGI:96274]	GO:0007165(signal transduction);GO:0007186(G-protein coupled receptor protein signaling pathway)	GO:0001584(rhodopsin-like receptor activity);GO:0004871(signal transducer activity);GO:0004872(receptor activity);GO:0004930(G-protein coupled receptor activity);GO:0004935(adrenoceptor activity);GO:0004983(neuropeptide Y receptor activity);GO:0004993(serotonin receptor activity)	GO:0016020(membrane);GO:0016021(integral to membrane)	21.3222	18.0438	0.846244	-0.240854			21.3222	11.8306	0.554846	-0.84984
-	M400010831									39261.2	43914.9	1.11853	0.161608			39261.2	27556.2	0.701868	-0.510729
Cd83	M200014952	ENSMUSG00000015396	NM_009856	12522	Cd83	CD83 antigen [Source:MarkerSymbol;Acc:MGI:1328316]			GO:0005615(extracellular space);GO:0005886(plasma membrane);GO:0016021(integral to membrane)	9.78951	3.85947	0.394245	-1.34283		*	9.78951	0.790885	0.0807891	-3.6297		***
Tpbpb	M400007949									24.6689	25.9444	1.0517	0.0727268			24.6689	20.2695	0.821661	-0.283385
Fas	M200000655	ENSMUSG00000024778	NM_007987	0	Fas	Fas (TNF receptor superfamily member) [Source:MarkerSymbol;Acc:MGI:95484]	GO:0006915(apoptosis);GO:0006924(activated T cell apoptosis);GO:0006925(inflammatory cell apoptosis);GO:0006927(transformed cell apoptosis);GO:0006955(immune response);GO:0007165(signal transduction);GO:0008625(induction of apoptosis via death domain receptors);GO:0043065(positive regulation of apoptosis);GO:0045060(negative thymic T cell selection)	GO:0004872(receptor activity);GO:0004888(transmembrane receptor activity);GO:0005515(protein binding)	GO:0009897(external side of plasma membrane);GO:0016020(membrane);GO:0016021(integral to membrane)	31.4214	56.2729	1.79091	0.840694			31.4214	59.4919	1.89336	0.920946
Ccl6	M200000046	ENSMUSG00000018927	NM_009139	20305	Ccl6	chemokine (C-C motif) ligand 6 [Source:MarkerSymbol;Acc:MGI:98263]	GO:0006935(chemotaxis);GO:0006955(immune response);GO:0007165(signal transduction)	GO:0005125(cytokine activity);GO:0008009(chemokine activity)	GO:0005576(extracellular region);GO:0005615(extracellular space)	5.25262	7.0029	1.33322	0.414914			5.25262	4.33609	0.825509	-0.276644
Keap1	M200009625	ENSMUSG00000003308		0	Keap1	kelch-like ECH-associated protein 1 [Source:MarkerSymbol;Acc:MGI:1858732]				102.919	107.036	1.04	0.0565843			102.919	53.629	0.521077	-0.94043
Dnaja1	M200005745	ENSMUSG00000028410	NM_008298	100048597	Dnaja1	DnaJ (Hsp40) homolog, subfamily A, member 1 [Source:MarkerSymbol;Acc:MGI:1270129]	GO:0006457(protein folding);GO:0007283(spermatogenesis);GO:0009408(response to heat);GO:0030317(sperm motility);GO:0030521(androgen receptor signaling pathway)	GO:0008270(zinc ion binding);GO:0031072(heat shock protein binding);GO:0046872(metal ion binding);GO:0050750(low-density lipoprotein receptor binding);GO:0051082(unfolded protein binding)		517.727	539.828	1.04269	0.060308			517.727	343.858	0.664169	-0.590378
-	M400019239									34.7951	41.0824	1.18069	0.239635			34.7951	40.9022	1.17552	0.233294
-	M400019083									6.57416	8.00418	1.21752	0.283947			6.57416	3.85441	0.586297	-0.770296
-	M400018246									583.878	569.686	0.975693	-0.0355004			583.878	377.239	0.646092	-0.630188
Gsta2	M400006126	ENSMUSG00000074183;ENSMUSG00000057933;ENSMUSG00000074181;ENSMUSG00000074179	NM_008182	14858	Gsta2	glutathione S-transferase, alpha 2 (Yc2) [Source:MarkerSymbol;Acc:MGI:95863]	GO:0008152(metabolic process)	GO:0004364(glutathione transferase activity);GO:0016740(transferase activity)		51.559	22.031	0.427297	-1.22669		*	51.559	282.134	5.47207	2.45209	**
-	M400017361									4.19927	5.65498	1.34666	0.429384			4.19927	2.42513	0.577512	-0.792077
-	M400017279									4.20024	6.27362	1.49363	0.578824			4.20024	3.30312	0.786411	-0.346644
-	M400016441									184.691	186.347	1.00897	0.0128792			184.691	322.04	1.74367	0.802126
-	M400016386									451.029	400.337	0.887609	-0.172004			451.029	294.322	0.652557	-0.615825
-	M400016078									18.3602	21.0093	1.14428	0.194443			18.3602	13.9778	0.76131	-0.393444
-	M400016042										2.2905						4.44348
-	M400015772									4.67941	7.72793	1.65147	0.723755			4.67941	5.88447	1.25752	0.330586
Zfp746	M400006026									50.8036	49.6596	0.977482	-0.0328586			50.8036	43.0534	0.847449	-0.238802
-	M400011720										3.74379						1.8632
V1rg5	M400003328	ENSMUSG00000047655	NM_134206	171240	V1rg5	vomeronasal 1 receptor, G5 [Source:MarkerSymbol;Acc:MGI:2159644]	GO:0007186(G-protein coupled receptor protein signaling pathway);GO:0019236(response to pheromone)	GO:0001584(rhodopsin-like receptor activity);GO:0004872(receptor activity);GO:0005550(pheromone binding);GO:0016503(pheromone receptor activity)	GO:0005887(integral to plasma membrane);GO:0016021(integral to membrane)	2.48437	1.90197	0.765576	-0.385382			2.48437	1.79062	0.720753	-0.472423
Calcr	M400009396	ENSMUSG00000023964	NM_007588	12311	Calcr	calcitonin receptor [Source:MarkerSymbol;Acc:MGI:101950]	GO:0007165(signal transduction);GO:0007186(G-protein coupled receptor protein signaling pathway);GO:0007189(G-protein signaling, adenylate cyclase activating pathway);GO:0007204(elevation of cytosolic calcium ion concentration);GO:0030279(negative regulation of ossification);GO:0030316(osteoclast differentiation);GO:0043488(regulation of mRNA stability);GO:0045124(regulation of bone resorption)	GO:0004871(signal transducer activity);GO:0004872(receptor activity);GO:0004930(G-protein coupled receptor activity);GO:0004948(calcitonin receptor activity)	GO:0001669(acrosome);GO:0005615(extracellular space);GO:0016020(membrane);GO:0016021(integral to membrane);GO:0044442(microtubule-based flagellum part)	4.72177	8.51167	1.80264	0.850114			4.72177	9.69097	2.0524	1.03731	*
Adcyap1r1	M200014077	ENSMUSG00000029778	NM_007407	11517	Adcyap1r1	adenylate cyclase activating polypeptide 1 receptor 1 [Source:MarkerSymbol;Acc:MGI:108449]	GO:0007165(signal transduction);GO:0007186(G-protein coupled receptor protein signaling pathway);GO:0007275(multicellular organismal development);GO:0007283(spermatogenesis);GO:0030154(cell differentiation)	GO:0004871(signal transducer activity);GO:0004872(receptor activity);GO:0004930(G-protein coupled receptor activity);GO:0004999(vasoactive intestinal polypeptide receptor activity)	GO:0005615(extracellular space);GO:0016020(membrane);GO:0016021(integral to membrane)		1.95599						1.65453
-	M400007528									6.18299	8.1771	1.32252	0.403285			6.18299	5.32971	0.861996	-0.214247
Edg7	M200009821	ENSMUSG00000036832	NM_022983	65086	Edg7	endothelial differentiation, lysophosphatidic acid G-protein-coupled receptor 7 [Source:MarkerSymbol;Acc:MGI:1929469]	GO:0007165(signal transduction);GO:0007186(G-protein coupled receptor protein signaling pathway)	GO:0001584(rhodopsin-like receptor activity);GO:0001619(lysosphingolipid and lysophosphatidic acid receptor activity);GO:0004871(signal transducer activity);GO:0004872(receptor activity);GO:0004930(G-protein coupled receptor activity)	GO:0016020(membrane);GO:0016021(integral to membrane)	3.10414	5.0963	1.64177	0.715255			3.10414	3.45199	1.11206	0.153233
Dll1	M200002010	ENSMUSG00000014773	NM_007865	13388	Dll1	delta-like 1 (Drosophila) [Source:MarkerSymbol;Acc:MGI:104659]	GO:0001701(in utero embryonic development);GO:0001709(cell fate determination);GO:0001756(somitogenesis);GO:0001757(somite specification);GO:0007154(cell communication);GO:0007219(Notch signaling pathway);GO:0007275(multicellular organismal development);GO:0007368(determination of left/right symmetry);GO:0007386(compartment specification);GO:0007399(nervous system development);GO:0009887(organ mo…	GO:0005112(Notch binding);GO:0005509(calcium ion binding);GO:0005515(protein binding)	GO:0005576(extracellular region);GO:0005615(extracellular space);GO:0005886(plasma membrane);GO:0005887(integral to plasma membrane);GO:0016020(membrane);GO:0016021(integral to membrane);GO:0031410(cytoplasmic vesicle)	15.5621	33.1267	2.12867	1.08995	*		15.5621	10.7178	0.688712	-0.538027
Tbx2	M200001834	ENSMUSG00000000093	NM_009324	21385	Tbx2	T-box 2 [Source:MarkerSymbol;Acc:MGI:98494]	GO:0000122(negative regulation of transcription from RNA polymerase II promoter);GO:0003007(heart morphogenesis);GO:0006350(transcription);GO:0006355(regulation of transcription, DNA-dependent);GO:0007275(multicellular organismal development);GO:0007521(muscle cell fate determination);GO:0007569(cell aging);GO:0008284(positive regulation of cell proliferation);GO:0016481(negative regulation of tr…	GO:0003677(DNA binding);GO:0003700(transcription factor activity);GO:0005515(protein binding);GO:0016564(transcriptional repressor activity)	GO:0005634(nucleus);GO:0005667(transcription factor complex)	11.7857	10.6446	0.90318	-0.146915			11.7857	12.8298	1.08859	0.122461
Mtf1	M200001813	ENSMUSG00000028890	NM_008636	17764	Mtf1	metal response element binding transcription factor 1 [Source:MarkerSymbol;Acc:MGI:101786]	GO:0006350(transcription);GO:0006355(regulation of transcription, DNA-dependent);GO:0006979(response to oxidative stress);GO:0045944(positive regulation of transcription from RNA polymerase II promoter);GO:0046686(response to cadmium ion)	GO:0003676(nucleic acid binding);GO:0003677(DNA binding);GO:0003700(transcription factor activity);GO:0008270(zinc ion binding);GO:0042156(zinc-mediated transcriptional activator activity);GO:0046872(metal ion binding)	GO:0005622(intracellular);GO:0005634(nucleus)	17.7321	10.7024	0.603559	-0.728433			17.7321	11.0793	0.624817	-0.678495
Cst3	M200001658	ENSMUSG00000027447	NM_009976	13010	Cst3	cystatin C [Source:MarkerSymbol;Acc:MGI:102519]		GO:0004866(endopeptidase inhibitor activity);GO:0004869(cysteine protease inhibitor activity)	GO:0005615(extracellular space)	1334.08	2729.61	2.04607	1.03286	*		1334.08	1079.57	0.809226	-0.305385
Ints6	M200001625	ENSMUSG00000035161	NM_008715	18130	Ints6	integrator complex subunit 6 [Source:MarkerSymbol;Acc:MGI:1202397]	GO:0016180(snRNA processing)	GO:0003676(nucleic acid binding);GO:0005515(protein binding);GO:0005524(ATP binding);GO:0008026(ATP-dependent helicase activity)	GO:0005615(extracellular space);GO:0005634(nucleus);GO:0032039(integrator complex)	46.0223	36.8844	0.801447	-0.319321			46.0223	84.7916	1.8424	0.881588
Etf1	M200001473	ENSMUSG00000024360	NM_144866	225363	Etf1	eukaryotic translation termination factor 1 [Source:MarkerSymbol;Acc:MGI:2385071]	GO:0006412(translation);GO:0006415(translational termination)	GO:0003747(translation release factor activity);GO:0005515(protein binding);GO:0016149(translation release factor activity, codon specific)	GO:0005575(cellular_component);GO:0005737(cytoplasm)	876.083	515.538	0.588457	-0.76499			876.083	1061.64	1.2118	0.277153
Hmgcr	M300002883	ENSMUSG00000021670		15357	Hmgcr	3-hydroxy-3-methylglutaryl-Coenzyme A reductase [Source:MarkerSymbol;Acc:MGI:96159]	GO:0006629(lipid metabolic process);GO:0006694(steroid biosynthetic process);GO:0006695(cholesterol biosynthetic process);GO:0008542(visual learning);GO:0008610(lipid biosynthetic process);GO:0009058(biosynthetic process);GO:0009790(embryonic development);GO:0016126(sterol biosynthetic process);GO:0043407(negative regulation of MAPK activity)	GO:0004420(hydroxymethylglutaryl-CoA reductase (NADPH) activity);GO:0016491(oxidoreductase activity)	GO:0005777(peroxisome);GO:0005783(endoplasmic reticulum);GO:0005789(endoplasmic reticulum membrane);GO:0005792(microsome);GO:0016020(membrane);GO:0016021(integral to membrane)	30.4277	28.3466	0.931603	-0.102213			30.4277	66.0373	2.1703	1.1179	*
Tpsab1	M200001276	ENSMUSG00000024173	NM_031187	17230	Tpsab1	tryptase alpha/beta 1 [Source:MarkerSymbol;Acc:MGI:96943]	GO:0006508(proteolysis)	GO:0004252(serine-type endopeptidase activity);GO:0008233(peptidase activity);GO:0016787(hydrolase activity);GO:0030019(tryptase activity)	GO:0005615(extracellular space)	8.08193	4.37229	0.540996	-0.886311			8.08193	37.5165	4.64202	2.21475	**
Plfr	M200001257	ENSMUSG00000021348	NM_011120	18814	Plfr	proliferin related protein [Source:MarkerSymbol;Acc:MGI:97619]		GO:0005179(hormone activity)	GO:0005576(extracellular region);GO:0005615(extracellular space)		1.95333
Tyro3	M200001103	ENSMUSG00000027298		100048488	Tyro3	TYRO3 protein tyrosine kinase 3 [Source:MarkerSymbol;Acc:MGI:104294]	GO:0006468(protein amino acid phosphorylation);GO:0007155(cell adhesion)	GO:0000166(nucleotide binding);GO:0004672(protein kinase activity);GO:0004674(protein serine/threonine kinase activity);GO:0004713(protein-tyrosine kinase activity);GO:0004872(receptor activity);GO:0005515(protein binding);GO:0005524(ATP binding);GO:0016301(kinase activity);GO:0016740(transferase activity)	GO:0005615(extracellular space);GO:0016020(membrane);GO:0016021(integral to membrane)	37.4287	20.6219	0.550966	-0.859964			37.4287	28.1863	0.753068	-0.409149
Tff1	M200001084	ENSMUSG00000024032	NM_009362	100041004	Tff1	trefoil factor 1 [Source:MarkerSymbol;Acc:MGI:88135]	GO:0008285(negative regulation of cell proliferation);GO:0009611(response to wounding);GO:0030154(cell differentiation)	GO:0005515(protein binding);GO:0008083(growth factor activity)	GO:0005737(cytoplasm)	11.2395	10.5356	0.937377	-0.0932987			11.2395	8.43365	0.750358	-0.414348
Sh3d19	M200000930	ENSMUSG00000028082	NM_012059	27059	Sh3d19	SH3 domain protein D19 [Source:MarkerSymbol;Acc:MGI:1350923]	GO:0008150(biological_process)	GO:0003674(molecular_function)	GO:0005575(cellular_component)	118.612	123.099	1.03783	0.0535634			118.612	87.5931	0.738482	-0.437365
Syp	M200000900	ENSMUSG00000031144	NM_009305	0	Syp	synaptophysin [Source:MarkerSymbol;Acc:MGI:98467]	GO:0006810(transport);GO:0006897(endocytosis);GO:0007268(synaptic transmission)	GO:0005215(transporter activity);GO:0005509(calcium ion binding);GO:0015485(cholesterol binding)	GO:0008021(synaptic vesicle);GO:0016020(membrane);GO:0016021(integral to membrane);GO:0019717(synaptosome);GO:0030285(integral to synaptic vesicle membrane);GO:0030672(synaptic vesicle membrane);GO:0042734(presynaptic membrane);GO:0045202(synapse)	3.31224	3.24321	0.979157	-0.0303877			3.31224	1.29302	0.390375	-1.35707		*
Taf6	M200000755	ENSMUSG00000036980	NM_009315	21343	Taf6	TAF6 RNA polymerase II, TATA box binding protein (TBP)-associated factor [Source:MarkerSymbol;Acc:MGI:109129]	GO:0006350(transcription);GO:0006352(transcription initiation);GO:0006355(regulation of transcription, DNA-dependent);GO:0051090(regulation of transcription factor activity)	GO:0003702(RNA polymerase II transcription factor activity);GO:0004571(mannosyl-oligosaccharide 1,2(alpha-mannosidase activity);GO:0005509(calcium ion binding);GO:0016986(transcription initiation factor activity)	GO:0005634(nucleus);GO:0005669(transcription factor TFIID complex);GO:0016020(membrane)	46.819	39.9591	0.85348	-0.228572			46.819	38.0819	0.813385	-0.29799
Rab36	M300002042	ENSMUSG00000020175	XM_125709	76877	Rab36	RAB36, member RAS oncogene family [Source:MarkerSymbol;Acc:MGI:1924127]	GO:0007264(small GTPase mediated signal transduction);GO:0015031(protein transport)	GO:0000166(nucleotide binding);GO:0005525(GTP binding)	GO:0016020(membrane)		3.24729						2.3382
Rptn	M200000576	ENSMUSG00000041984	NM_009100	20129	Rptn	repetin [Source:MarkerSymbol;Acc:MGI:1099055]		GO:0005198(structural molecule activity);GO:0005509(calcium ion binding)	GO:0001533(cornified envelope);GO:0005578(proteinaceous extracellular matrix)	2.28876	2.57129	1.12344	0.167925			2.28876	1.34671	0.588402	-0.765125
Rab11a	M200000553	ENSMUSG00000004771	NM_017382	53869	Rab11a	RAB11a, member RAS oncogene family [Source:MarkerSymbol;Acc:MGI:1858202]	GO:0000160(two-component signal transduction system (phosphorelay));GO:0006355(regulation of transcription, DNA-dependent);GO:0006810(transport);GO:0007264(small GTPase mediated signal transduction);GO:0015031(protein transport);GO:0048227(plasma membrane to endosome transport)	GO:0000166(nucleotide binding);GO:0003677(DNA binding);GO:0003924(GTPase activity);GO:0005215(transporter activity);GO:0005515(protein binding);GO:0005525(GTP binding);GO:0008565(protein transporter activity);GO:0019905(syntaxin binding)	GO:0005802(Golgi trans face)	823.673	941.727	1.14333	0.193238			823.673	673.081	0.817171	-0.29129
Ube1x	M200000399	ENSMUSG00000001924	NM_009457	22201	Ube1x	ubiquitin-activating enzyme E1, Chr X [Source:MarkerSymbol;Acc:MGI:98890]	GO:0006464(protein modification);GO:0006511(ubiquitin-dependent protein catabolic process);GO:0006512(ubiquitin cycle)	GO:0000166(nucleotide binding);GO:0003824(catalytic activity);GO:0004839(ubiquitin activating enzyme activity);GO:0005515(protein binding);GO:0005524(ATP binding);GO:0008641(small protein activating enzyme activity);GO:0016874(ligase activity)		830.356	672.249	0.809591	-0.304734			830.356	148.611	0.178973	-2.48219		**
Arrb1	M300001748	ENSMUSG00000018909	NM_177231;NM_178220	109689	Arrb1	arrestin, beta 1 [Source:MarkerSymbol;Acc:MGI:99473]	GO:0007165(signal transduction);GO:0007600(sensory perception);GO:0008277(regulation of G-protein coupled receptor protein signaling pathway);GO:0050896(response to stimulus)	GO:0005515(protein binding)	GO:0005622(intracellular);GO:0005624(membrane fraction);GO:0005737(cytoplasm)	4.04705	2.74308	0.677797	-0.561075			4.04705	2.48707	0.614539	-0.702424
Tnp1	M200000232	ENSMUSG00000026182	NM_009407	21958	Tnp1	transition protein 1 [Source:MarkerSymbol;Acc:MGI:98784]	GO:0000012(single strand break repair);GO:0006337(nucleosome disassembly);GO:0006338(chromatin remodeling);GO:0006342(chromatin silencing);GO:0007001(chromosome organization and biogenesis (sensu Eukaryota));GO:0007275(multicellular organismal development);GO:0007283(spermatogenesis);GO:0007290(spermatid nuclear elongation);GO:0019953(sexual reproduction);GO:0030154(cell differentiation);GO:00303…	GO:0003677(DNA binding)	GO:0000786(nucleosome);GO:0001673(male germ cell nucleus);GO:0005634(nucleus);GO:0005694(chromosome)		2.29243						0.467651
Gpi1	M200000208	ENSMUSG00000036427	NM_008155	14751	Gpi1	glucose phosphate isomerase 1 [Source:MarkerSymbol;Acc:MGI:95797]				852.327	1009.17	1.18401	0.243687			852.327	691.548	0.811364	-0.301579
Mafk	M200000058	ENSMUSG00000018143	NM_010757	17135	Mafk	v-maf musculoaponeurotic fibrosarcoma oncogene family, protein K (avian) [Source:MarkerSymbol;Acc:MGI:99951]	GO:0000074(regulation of progression through cell cycle);GO:0006350(transcription);GO:0006355(regulation of transcription, DNA-dependent);GO:0009987(cellular process)	GO:0003677(DNA binding);GO:0003700(transcription factor activity);GO:0005515(protein binding);GO:0043565(sequence-specific DNA binding);GO:0046983(protein dimerization activity)	GO:0005622(intracellular);GO:0005634(nucleus)	19.686	23.3631	1.18679	0.247064			19.686	35.5641	1.80657	0.853251
Ryr3	M300000451	ENSMUSG00000057378		0	Ryr3	ryanodine receptor 3 [Source:MarkerSymbol;Acc:MGI:99684]	GO:0006810(transport);GO:0006811(ion transport);GO:0006816(calcium ion transport);GO:0006874(calcium ion homeostasis);GO:0006941(striated muscle contraction)	GO:0004872(receptor activity);GO:0005216(ion channel activity);GO:0005219(ryanodine-sensitive calcium-release channel activity);GO:0005262(calcium channel activity);GO:0005509(calcium ion binding)	GO:0016020(membrane);GO:0016021(integral to membrane);GO:0030314(junctional membrane complex)		2.06685						2.59232
Hipk1	M200003942	ENSMUSG00000008730		0	Hipk1	homeodomain interacting protein kinase 1 [Source:MarkerSymbol;Acc:MGI:1314873]				126.682	126.844	1.00128	0.00185221			126.682	129.706	1.02388	0.034041
Rgs6	M200003916	ENSMUSG00000021219	NM_015812	50779	Rgs6	regulator of G-protein signaling 6 [Source:MarkerSymbol;Acc:MGI:1354730]				3.86076	2.45725	0.636468	-0.651839			3.86076	1.81668	0.470549	-1.08758		*
Ndufa8	M200003777	ENSMUSG00000026895	NM_026703	68375	Ndufa8	NADH dehydrogenase (ubiquinone) 1 alpha subcomplex, 8 [Source:MarkerSymbol;Acc:MGI:1915625]		GO:0003954(NADH dehydrogenase activity);GO:0008137(NADH dehydrogenase (ubiquinone) activity);GO:0016491(oxidoreductase activity)	GO:0005739(mitochondrion);GO:0005743(mitochondrial inner membrane);GO:0005747(mitochondrial respiratory chain complex I)	990.417	1265.43	1.27768	0.353521			990.417	865.774	0.874152	-0.194045
Mettl7b	M200003753	ENSMUSG00000025347	NM_027853	71664	Mettl7b	methyltransferase like 7B [Source:MarkerSymbol;Acc:MGI:1918914]		GO:0008168(methyltransferase activity);GO:0008757(S-adenosylmethionine-dependent methyltransferase activity);GO:0016740(transferase activity)		5.3169	3.74906	0.705122	-0.504055			5.3169	3.5777	0.672892	-0.571553
Slc2a2	M200003608	ENSMUSG00000027690	NM_031197	20526	Slc2a2	solute carrier family 2 (facilitated glucose transporter), member 2 [Source:MarkerSymbol;Acc:MGI:1095438]	GO:0006810(transport);GO:0008643(carbohydrate transport)	GO:0005215(transporter activity);GO:0005351(sugar porter activity);GO:0005355(glucose transporter activity)	GO:0005886(plasma membrane);GO:0005903(brush border);GO:0016020(membrane);GO:0016021(integral to membrane)	3.70761	3.30294	0.890856	-0.166737			3.70761	1.05111	0.283501	-1.81857		*
Rph3a	M300006767	ENSMUSG00000029608	NM_011286	19894	Rph3a	rabphilin 3A [Source:MarkerSymbol;Acc:MGI:102788]	GO:0006810(transport);GO:0006886(intracellular protein transport);GO:0015031(protein transport)	GO:0005215(transporter activity);GO:0005515(protein binding);GO:0008270(zinc ion binding);GO:0017137(Rab GTPase binding);GO:0046872(metal ion binding)	GO:0008021(synaptic vesicle);GO:0016020(membrane);GO:0045202(synapse)	4.69991	3.74906	0.797687	-0.326105			4.69991	3.17074	0.674638	-0.567815
Mtcp1	M200003429	ENSMUSG00000031200	NM_010839	0	Mtcp1	mature T-cell proliferation 1 [Source:MarkerSymbol;Acc:MGI:102699]			GO:0005739(mitochondrion)	35.1968	43.6048	1.23889	0.309043			35.1968	25.1677	0.715056	-0.483871
1810030O07Rik	M200003408	ENSMUSG00000044148	NM_175141	69155	1810030O07Rik	RIKEN cDNA 1810030O07 gene [Source:MarkerSymbol;Acc:MGI:1916405]				155.896	135.369	0.868329	-0.203687			155.896	87.8376	0.563437	-0.827673
Rgs11	M200003232	ENSMUSG00000024186		100048881	Rgs11	regulator of G-protein signaling 11 [Source:MarkerSymbol;Acc:MGI:1354739]	GO:0007186(G-protein coupled receptor protein signaling pathway);GO:0007242(intracellular signaling cascade);GO:0009968(negative regulation of signal transduction)	GO:0004871(signal transducer activity);GO:0005096(GTPase activator activity);GO:0005515(protein binding)	GO:0005834(heterotrimeric G-protein complex)	7.4197	6.21581	0.837744	-0.255419			7.4197	3.39723	0.457866	-1.127		*
Nme6	M200003205	ENSMUSG00000032478	NM_018757	100046163	Nme6	expressed in non-metastatic cells 6, protein [Source:MarkerSymbol;Acc:MGI:1861676]	GO:0006183(GTP biosynthetic process);GO:0006228(UTP biosynthetic process);GO:0006241(CTP biosynthetic process);GO:0009117(nucleotide metabolic process)	GO:0000166(nucleotide binding);GO:0000287(magnesium ion binding);GO:0004550(nucleoside diphosphate kinase activity);GO:0005524(ATP binding);GO:0016301(kinase activity);GO:0016740(transferase activity);GO:0046872(metal ion binding)	GO:0005615(extracellular space)	108.221	102.473	0.946885	-0.0787392			108.221	127.911	1.18194	0.241158
Stxbp3a	M200003069	ENSMUSG00000027882	NM_011504	20912	Stxbp3a	syntaxin binding protein 3A [Source:MarkerSymbol;Acc:MGI:107362]	GO:0006810(transport);GO:0006904(vesicle docking during exocytosis);GO:0015031(protein transport);GO:0015758(glucose transport);GO:0016192(vesicle-mediated transport)	GO:0005515(protein binding);GO:0019905(syntaxin binding)	GO:0005829(cytosol);GO:0005886(plasma membrane)	106.811	107.938	1.01056	0.0151487			106.811	130.289	1.21981	0.28666
Bxdc1	M200003043	ENSMUSG00000038510	NM_023323	67239	Bxdc1	brix domain containing 1 [Source:MarkerSymbol;Acc:MGI:1914489]			GO:0005634(nucleus)	282.325	209.982	0.743759	-0.427092			282.325	487.918	1.72822	0.789283
Syngr1	M200002898	ENSMUSG00000022415	NM_009303	20972	Syngr1	synaptogyrin 1 [Source:MarkerSymbol;Acc:MGI:1328323]	GO:0006605(protein targeting)		GO:0008021(synaptic vesicle);GO:0016020(membrane);GO:0016021(integral to membrane);GO:0045202(synapse)	13.4602	17.9833	1.33604	0.417959			13.4602	26.9069	1.999	0.999275
SYCP2_MOUSE	M300005682									2.65523	1.67543	0.630993	-0.664304			2.65523	1.10587	0.416489	-1.26365		*
Cbx4	M200002723	ENSMUSG00000039989	NM_007625	12418	Cbx4	chromobox homolog 4 (Drosophila Pc class) [Source:MarkerSymbol;Acc:MGI:1195985]	GO:0006333(chromatin assembly or disassembly);GO:0006350(transcription);GO:0006355(regulation of transcription, DNA-dependent);GO:0006512(ubiquitin cycle);GO:0016568(chromatin modification)	GO:0003682(chromatin binding)	GO:0000785(chromatin);GO:0005634(nucleus)	37.6015	30.0972	0.800425	-0.321162			37.6015	30.5534	0.812558	-0.299457
Mcoln1	M200002702	ENSMUSG00000004567	NM_053177	0	Mcoln1	mucolipin 1 [Source:MarkerSymbol;Acc:MGI:1890498]	GO:0006810(transport);GO:0006811(ion transport);GO:0006816(calcium ion transport);GO:0016197(endosome transport)	GO:0005216(ion channel activity);GO:0005261(cation channel activity);GO:0005509(calcium ion binding)	GO:0005764(lysosome);GO:0005770(late endosome);GO:0016020(membrane);GO:0016021(integral to membrane)	145.107	181.149	1.24838	0.320054			145.107	82.8123	0.570696	-0.809206
Mark1	M200002548									3.70342	2.79681	0.755198	-0.405074			3.70342	2.90013	0.783096	-0.352738
Gamt	M200002525	ENSMUSG00000020150	NM_010255	0	Gamt	guanidinoacetate methyltransferase [Source:MarkerSymbol;Acc:MGI:1098221]	GO:0006601(creatine biosynthetic process);GO:0007283(spermatogenesis);GO:0009887(organ morphogenesis);GO:0040014(regulation of body size)	GO:0008168(methyltransferase activity);GO:0016740(transferase activity);GO:0030731(guanidinoacetate N-methyltransferase activity)		189.947	457.33	2.40767	1.26764	*		189.947	48.461	0.255129	-1.9707		*
Fkbp8	M200002387	ENSMUSG00000019428	NM_010223	14232	Fkbp8	FK506 binding protein 8 [Source:MarkerSymbol;Acc:MGI:1341070]	GO:0001708(cell fate specification);GO:0006457(protein folding);GO:0006915(apoptosis);GO:0007224(smoothened signaling pathway);GO:0009953(dorsal/ventral pattern formation);GO:0043010(camera-type eye development)	GO:0003755(peptidyl-prolyl cis-trans isomerase activity);GO:0005488(binding);GO:0005509(calcium ion binding);GO:0016853(isomerase activity)	GO:0005739(mitochondrion);GO:0005740(mitochondrial envelope);GO:0016020(membrane);GO:0016021(integral to membrane);GO:0030176(integral to endoplasmic reticulum membrane)	142.591	116.15	0.814564	-0.2959			142.591	122.677	0.860341	-0.21702
Timeless	M200002366	ENSMUSG00000039994	NM_011589	0	Timeless	timeless homolog (Drosophila) [Source:MarkerSymbol;Acc:MGI:1321393]	GO:0002009(morphogenesis of an epithelium);GO:0006350(transcription);GO:0006355(regulation of transcription, DNA-dependent);GO:0007275(multicellular organismal development);GO:0007623(circadian rhythm);GO:0016481(negative regulation of transcription);GO:0030324(lung development);GO:0048511(rhythmic process);GO:0048754(branching morphogenesis of a tube)	GO:0003677(DNA binding);GO:0005515(protein binding);GO:0042803(protein homodimerization activity);GO:0046982(protein heterodimerization activity)	GO:0005634(nucleus)	108.365	57.1076	0.526992	-0.924148			108.365	145.9	1.34638	0.429082
Klk8	M200002206	ENSMUSG00000064023	NM_008940	259277	Klk8	kallikrein related-peptidase 8 [Source:MarkerSymbol;Acc:MGI:1343327]	GO:0006508(proteolysis);GO:0050808(synapse organization and biogenesis)	GO:0004252(serine-type endopeptidase activity)		3.97667	2.34831	0.590523	-0.759936			3.97667	0.474827	0.119403	-3.06609		***
Fgf8	M300004517	ENSMUSG00000025219		0	Fgf8	fibroblast growth factor 8 [Source:MarkerSymbol;Acc:MGI:99604]				11.9505	9.46676	0.792162	-0.336133			11.9505	12.1301	1.01503	0.0215189
Gabra1	M200002029	ENSMUSG00000010803	NM_010250	14394	Gabra1	gamma-aminobutyric acid (GABA-A) receptor, subunit alpha 1 [Source:MarkerSymbol;Acc:MGI:95613]				3.89898	3.86066	0.990172	-0.0142483			3.89898	2.37861	0.61006	-0.712977
Spp2	M200005906	ENSMUSG00000026295	NM_029269	75396	Spp2	secreted phosphoprotein 2 [Source:MarkerSymbol;Acc:MGI:1922646]	GO:0046849(bone remodeling)		GO:0005576(extracellular region);GO:0005615(extracellular space)	4.60908	3.91779	0.850016	-0.234439			4.60908	3.31747	0.719769	-0.474395
Ckap1	M200005766									517.461	663.804	1.28281	0.359308			517.461	701.747	1.35614	0.439502
-	M200005742									36.1537	49.9337	1.38115	0.46587			36.1537	88.5458	2.44915	1.29228	*
Zfp68	M200005609									57.1399	61.2045	1.07113	0.0991393			57.1399	84.3801	1.47673	0.562405
D130059P03Rik	M300011611	ENSMUSG00000038538	NM_177185	320538	D130059P03Rik	RIKEN cDNA D130059P03 gene [Source:MarkerSymbol;Acc:MGI:2444236]	GO:0007017(microtubule-based process)	GO:0005525(GTP binding)	GO:0005874(microtubule)	69.0308	71.5734	1.03683	0.0521846			69.0308	76.3391	1.10587	0.145183
Anapc4	M200005436	ENSMUSG00000029176	NM_024213	52206	Anapc4	anaphase promoting complex subunit 4 [Source:MarkerSymbol;Acc:MGI:1098673]	GO:0006512(ubiquitin cycle);GO:0007049(cell cycle);GO:0007067(mitosis);GO:0051301(cell division)			599.93	546.707	0.911284	-0.134027			599.93	493.322	0.822299	-0.282265
5730536A07Rik	M200005420	ENSMUSG00000032381	NM_026635	68250	5730536A07Rik	RIKEN cDNA 5730536A07 gene [Source:MarkerSymbol;Acc:MGI:1915500]			GO:0005615(extracellular space)	204.973	179.048	0.873519	-0.195089			204.973	300.33	1.46522	0.551114
Sgk2	M200005275	ENSMUSG00000017868	NM_013731	0	Sgk2	serum/glucocorticoid regulated kinase 2 [Source:MarkerSymbol;Acc:MGI:1351318]	GO:0006468(protein amino acid phosphorylation)	GO:0000166(nucleotide binding);GO:0004672(protein kinase activity);GO:0004674(protein serine/threonine kinase activity);GO:0004682(protein kinase CK2 activity);GO:0004713(protein-tyrosine kinase activity);GO:0005524(ATP binding);GO:0015459(potassium channel regulator activity);GO:0016301(kinase activity);GO:0016740(transferase activity);GO:0017080(sodium channel regulator activity)	GO:0005575(cellular_component)	4.84705	2.46207	0.507951	-0.977238			4.84705	3.00752	0.620484	-0.688534
Acp1	M200005250	ENSMUSG00000044573	NM_021330	0	Acp1	acid phosphatase 1, soluble [Source:MarkerSymbol;Acc:MGI:87881]				55.1892	48.3707	0.876452	-0.190254			55.1892	47.0896	0.85324	-0.228976
Gstt3	M200005103	ENSMUSG00000001665	NM_133994	103140	Gstt3	glutathione S-transferase, theta 3 [Source:MarkerSymbol;Acc:MGI:2143526]	GO:0006749(glutathione metabolic process)	GO:0004364(glutathione transferase activity);GO:0016740(transferase activity)	GO:0005575(cellular_component)	12.4987	6.04781	0.483875	-1.04729		*	12.4987	6.54875	0.523954	-0.932487
Lrp4	M200005083	ENSMUSG00000027253	NM_172668	228357	Lrp4	low density lipoprotein receptor-related protein 4 [Source:MarkerSymbol;Acc:MGI:2442252]	GO:0006897(endocytosis);GO:0009953(dorsal/ventral pattern formation);GO:0030178(negative regulation of Wnt receptor signaling pathway);GO:0030326(embryonic limb morphogenesis);GO:0042733(embryonic digit morphogenesis)	GO:0004872(receptor activity);GO:0005509(calcium ion binding)	GO:0005615(extracellular space);GO:0005886(plasma membrane);GO:0016020(membrane);GO:0016021(integral to membrane)	23.4107	193.302	8.257	3.04562	***		23.4107	16.5913	0.708707	-0.49674
Slc25a19	M200004938	ENSMUSG00000020744	NM_026071	67283	Slc25a19	solute carrier family 25 (mitochondrial deoxynucleotide carrier), member 19 [Source:MarkerSymbol;Acc:MGI:1914533]	GO:0006810(transport)	GO:0005215(transporter activity);GO:0005488(binding)	GO:0005739(mitochondrion);GO:0005743(mitochondrial inner membrane);GO:0016020(membrane);GO:0016021(integral to membrane)	75.2294	74.9967	0.996907	-0.00446943			75.2294	46.1508	0.613468	-0.704941
Nrap	M300010469	ENSMUSG00000049134	NM_008733	18175	Nrap	nebulin-related anchoring protein [Source:MarkerSymbol;Acc:MGI:1098765]	GO:0030036(actin cytoskeleton organization and biogenesis)	GO:0003779(actin binding);GO:0005515(protein binding);GO:0008270(zinc ion binding);GO:0017166(vinculin binding);GO:0046872(metal ion binding);GO:0051371(muscle alpha-actinin binding)	GO:0005916(fascia adherens);GO:0005927(muscle tendon junction);GO:0030016(myofibril)	5.41929	13.4021	2.47304	1.30629	*		5.41929	10.4826	1.93431	0.95182
Slco1b2	M200004776	ENSMUSG00000030236	NM_020495	28253	Slco1b2	solute carrier organic anion transporter family, member 1b2 [Source:MarkerSymbol;Acc:MGI:1351899]	GO:0006810(transport);GO:0006811(ion transport);GO:0008150(biological_process)	GO:0005215(transporter activity);GO:0008514(organic anion transporter activity)	GO:0005887(integral to plasma membrane);GO:0016020(membrane);GO:0016021(integral to membrane)		2.79539
Blvrb	M200004758	ENSMUSG00000040466		0	Blvrb	biliverdin reductase B (flavin reductase (NADPH)) [Source:MarkerSymbol;Acc:MGI:2385271]	GO:0044237(cellular metabolic process)	GO:0003824(catalytic activity);GO:0003959(NADPH dehydrogenase activity);GO:0004074(biliverdin reductase activity);GO:0016491(oxidoreductase activity);GO:0042602(flavin reductase activity);GO:0050662(coenzyme binding)		144.268	114.685	0.794944	-0.331075			144.268	162.796	1.12843	0.174315
0610041E09Rik	M200004601									76.332	68.4443	0.896666	-0.157357			76.332	97.7792	1.28097	0.357239
1600012P17Rik	M200004576	ENSMUSG00000047661	XM_484930	0	1600012P17Rik	RIKEN cDNA 1600012P17 gene [Source:MarkerSymbol;Acc:MGI:1919275]				3.91245	5.54145	1.41636	0.502193			3.91245	4.38261	1.12017	0.163718
Exoc7	M200004418	ENSMUSG00000020792	NM_016857	0	Exoc7	exocyst complex component 7 [Source:MarkerSymbol;Acc:MGI:1859270]	GO:0006810(transport);GO:0006887(exocytosis);GO:0015031(protein transport)		GO:0000145(exocyst)	93.1557	112.254	1.20501	0.269047			93.1557	111.542	1.19737	0.259867
Ssbp2	M200004388	ENSMUSG00000003992		66970	Ssbp2	single-stranded DNA binding protein 2 [Source:MarkerSymbol;Acc:MGI:1914220]	GO:0006350(transcription);GO:0006355(regulation of transcription, DNA-dependent)	GO:0003677(DNA binding);GO:0003697(single-stranded DNA binding);GO:0005515(protein binding);GO:0030528(transcription regulator activity)	GO:0005634(nucleus)	20.5749	23.1918	1.12719	0.172727			20.5749	25.5999	1.24423	0.315249
Ela2a	M200004254	ENSMUSG00000058579	NM_007919	13706	Ela2a	elastase 2A [Source:MarkerSymbol;Acc:MGI:95316]	GO:0006508(proteolysis)	GO:0004252(serine-type endopeptidase activity);GO:0004281(pancreatic elastase II activity);GO:0008233(peptidase activity);GO:0016787(hydrolase activity)	GO:0005615(extracellular space)	14.106	14.3429	1.01679	0.0240225			14.106	25.0847	1.77829	0.830495
Agpat6	M300007771	ENSMUSG00000031545	NM_018743	102247	Agpat6	1-acylglycerol-3-phosphate O-acyltransferase 6 (lysophosphatidic acid acyltransferase, zeta) [Source:MarkerSymbol;Acc:MGI:2142716]	GO:0002071(glandular epithelial cell maturation);GO:0006631(fatty acid metabolic process);GO:0006641(triacylglycerol metabolic process);GO:0007595(lactation);GO:0008152(metabolic process);GO:0008610(lipid biosynthetic process);GO:0019432(triacylglycerol biosynthetic process);GO:0030879(mammary gland development);GO:0040014(regulation of body size);GO:0046339(diacylglycerol metabolic process)	GO:0003841(1(acylglycerol-3(phosphate O-acyltransferase activity);GO:0008415(acyltransferase activity);GO:0008780(acyl-[acyl-carrier-protein]-UDP-N-acetylglucosamine O-acyltransferase activity);GO:0016740(transferase activity)	GO:0005783(endoplasmic reticulum);GO:0016020(membrane);GO:0016021(integral to membrane);GO:0030176(integral to endoplasmic reticulum membrane)	130.081	115.471	0.88768	-0.171889			130.081	147.791	1.13614	0.184141
Rnf4	M200004097									287.971	209.862	0.728759	-0.456485			287.971	339.898	1.18032	0.239175
Osbpl5	M200004081	ENSMUSG00000037606	NM_024289	0	Osbpl5	oxysterol binding protein-like 5 [Source:MarkerSymbol;Acc:MGI:1930265]	GO:0006810(transport);GO:0006869(lipid transport);GO:0006893(Golgi to plasma membrane transport);GO:0008202(steroid metabolic process);GO:0008203(cholesterol metabolic process);GO:0030301(cholesterol transport)	GO:0008142(oxysterol binding)	GO:0005829(cytosol);GO:0016021(integral to membrane)	45.4128	55.4282	1.22054	0.28752			45.4128	35.265	0.776543	-0.364862
Cmtm7	M200007777	ENSMUSG00000032436	NM_133978	0	Cmtm7	CKLF-like MARVEL transmembrane domain containing 7 [Source:MarkerSymbol;Acc:MGI:2447166]	GO:0006935(chemotaxis)	GO:0005125(cytokine activity)	GO:0005615(extracellular space);GO:0016020(membrane);GO:0016021(integral to membrane)	187.498	139.721	0.745186	-0.424327			187.498	173.127	0.923349	-0.115052
Pip5kl1	M300016580	ENSMUSG00000046854	NM_198191	0	Pip5kl1	phosphatidylinositol-4-phosphate 5-kinase-like 1 [Source:MarkerSymbol;Acc:MGI:2448520]		GO:0005515(protein binding);GO:0016301(kinase activity);GO:0016308(1(phosphatidylinositol-4(phosphate 5(kinase activity)	GO:0042995(cell projection)	3.19349	1.90078	0.595205	-0.748542			3.19349	0.84458	0.264469	-1.91883		*
Rpo1-3	M200007605	ENSMUSG00000029642	NM_009087	20018	Rpo1-3	RNA polymerase 1-3 [Source:MarkerSymbol;Acc:MGI:108403]	GO:0006350(transcription)	GO:0003677(DNA binding);GO:0003899(DNA-directed RNA polymerase activity);GO:0005515(protein binding);GO:0016740(transferase activity);GO:0016779(nucleotidyltransferase activity);GO:0046983(protein dimerization activity)	GO:0005634(nucleus);GO:0005736(DNA-directed RNA polymerase I complex)	412.794	498.309	1.20716	0.27162			412.794	512.067	1.24049	0.310911
E130307M08Rik	M200007587	ENSMUSG00000003199	NM_026530	0	E130307M08Rik	RIKEN cDNA E130307M08 gene [Source:MarkerSymbol;Acc:MGI:1915297]				231.37	282.332	1.22026	0.287188			231.37	101.694	0.439532	-1.18596		*
Dok3	M200007444	ENSMUSG00000035711	NM_013739	27261	Dok3	docking protein 3 [Source:MarkerSymbol;Acc:MGI:1351490]	GO:0007265(Ras protein signal transduction)	GO:0005158(insulin receptor binding);GO:0005515(protein binding)	GO:0005737(cytoplasm)	21.3986	26.1207	1.22067	0.287676			21.3986	20.1195	0.940225	-0.0889224
Gnpda2	M200007425	ENSMUSG00000029209		67980	Gnpda2	glucosamine-6-phosphate deaminase 2 [Source:MarkerSymbol;Acc:MGI:1915230]	GO:0005975(carbohydrate metabolic process);GO:0006044(N-acetylglucosamine metabolic process)	GO:0004342(glucosamine-6(phosphate deaminase activity);GO:0016853(isomerase activity)		34.0798	35.6517	1.04612	0.0650538			34.0798	17.7301	0.520253	-0.942714
-	M200007245									77.0302	87.4882	1.13576	0.183664			77.0302	81.8665	1.06278	0.0878498
Zfp281	M200007226	ENSMUSG00000041483	NM_177643	0	Zfp281	zinc finger protein 281 [Source:MarkerSymbol;Acc:MGI:3029290]		GO:0003676(nucleic acid binding);GO:0008270(zinc ion binding);GO:0046872(metal ion binding)	GO:0005622(intracellular)	60.4548	60.875	1.00695	0.00999342			60.4548	57.4531	0.950348	-0.0734729
Camk2n2	M200007064	ENSMUSG00000051146		73047	Camk2n2	calcium/calmodulin-dependent protein kinase II inhibitor 2 [Source:MarkerSymbol;Acc:MGI:1920297]				23.3186	15.9142	0.682471	-0.551161			23.3186	14.8659	0.637512	-0.649475
Myst4	M200007040	ENSMUSG00000021767		0	Myst4	MYST histone acetyltransferase monocytic leukemia 4 [Source:MarkerSymbol;Acc:MGI:1858746]	GO:0006334(nucleosome assembly);GO:0006350(transcription);GO:0006355(regulation of transcription, DNA-dependent);GO:0016481(negative regulation of transcription);GO:0016568(chromatin modification);GO:0016573(histone acetylation);GO:0045941(positive regulation of transcription)	GO:0003677(DNA binding);GO:0004402(histone acetyltransferase activity);GO:0004406(H3/H4 histone acetyltransferase activity);GO:0005515(protein binding);GO:0008134(transcription factor binding);GO:0008270(zinc ion binding);GO:0008415(acyltransferase activity);GO:0016407(acetyltransferase activity);GO:0016563(transcriptional activator activity);GO:0016564(transcriptional repressor activity);GO:0016…	GO:0000786(nucleosome);GO:0005634(nucleus)	78.9126	71.7465	0.909188	-0.137349			78.9126	39.2858	0.497839	-1.00625		*
Sdf4	M200006866	ENSMUSG00000029076	NM_011341	20318	Sdf4	stromal cell derived factor 4 [Source:MarkerSymbol;Acc:MGI:108079]		GO:0005509(calcium ion binding)	GO:0005615(extracellular space)	331.722	363.143	1.09472	0.130564			331.722	362.72	1.09344	0.128879
Txlna	M300012849	ENSMUSG00000053841	NM_001005506	0	Txlna	taxilin alpha [Source:MarkerSymbol;Acc:MGI:105968]	GO:0006887(exocytosis)			26.6652	17.4254	0.653489	-0.613765			26.6652	15.9488	0.598115	-0.741506
Csnk1g2	M200006701	ENSMUSG00000003345	NM_134002	103236	Csnk1g2	casein kinase 1, gamma 2 [Source:MarkerSymbol;Acc:MGI:1920014]	GO:0006468(protein amino acid phosphorylation);GO:0016055(Wnt receptor signaling pathway)	GO:0000166(nucleotide binding);GO:0004672(protein kinase activity);GO:0004674(protein serine/threonine kinase activity);GO:0004713(protein-tyrosine kinase activity);GO:0005524(ATP binding);GO:0016301(kinase activity);GO:0016740(transferase activity)		503.32	563.305	1.11918	0.162442			503.32	398.661	0.792064	-0.336312
Rhebl1	M200006679	ENSMUSG00000023755	NM_026967	69159	Rhebl1	Ras homolog enriched in brain like 1 [Source:MarkerSymbol;Acc:MGI:1916409]	GO:0007264(small GTPase mediated signal transduction);GO:0015031(protein transport)	GO:0000166(nucleotide binding);GO:0005525(GTP binding)	GO:0005622(intracellular);GO:0016020(membrane)	54.9493	55.7766	1.01506	0.0215604			54.9493	55.1434	1.00353	0.00508753
Ranbp3	M200006560	ENSMUSG00000002372	XM_128698	71810	Ranbp3	RAN binding protein 3 [Source:MarkerSymbol;Acc:MGI:1919060]	GO:0006810(transport);GO:0015031(protein transport);GO:0046907(intracellular transport)	GO:0005515(protein binding)	GO:0005634(nucleus)	283.991	228.91	0.806045	-0.311068			283.991	245.639	0.864954	-0.209305
Mmp2	M200006538	ENSMUSG00000031740	NM_008610	17390	Mmp2	matrix metallopeptidase 2 [Source:MarkerSymbol;Acc:MGI:97009]	GO:0000270(peptidoglycan metabolic process);GO:0001955(blood vessel maturation);GO:0006508(proteolysis);GO:0030574(collagen catabolic process)	GO:0004222(metalloendopeptidase activity);GO:0004228(gelatinase A activity);GO:0005509(calcium ion binding);GO:0005515(protein binding);GO:0008233(peptidase activity);GO:0008237(metallopeptidase activity);GO:0008270(zinc ion binding);GO:0016787(hydrolase activity);GO:0046872(metal ion binding)	GO:0005578(proteinaceous extracellular matrix);GO:0005615(extracellular space)	139.237	495.071	3.55561	1.8301	*		139.237	42.7169	0.306794	-1.70466		*
2810046M22Rik	M200006400	ENSMUSG00000055235	NM_026621	269633	2810046M22Rik	RIKEN cDNA 2810046M22 gene [Source:MarkerSymbol;Acc:MGI:1915466]				3.03288	2.35262	0.775704	-0.366422			3.03288	0.950898	0.313529	-1.67333		*
Lmo4	M200006369									196.188	175.904	0.89661	-0.157447			196.188	231.868	1.18187	0.241068
1810008A14Rik	M200006233	ENSMUSG00000010607	NM_025457	0	1810008A14Rik	RIKEN cDNA 1810008A14 gene [Source:MarkerSymbol;Acc:MGI:1913518]				47.5156	64.011	1.34716	0.429917			47.5156	32.6196	0.686502	-0.542664
Lman1l	M300012278	ENSMUSG00000056271	NM_199222	235416	Lman1l	lectin, mannose-binding 1 like [Source:MarkerSymbol;Acc:MGI:2667537]		GO:0005529(sugar binding)	GO:0016020(membrane);GO:0016021(integral to membrane)	16.1768	23.8698	1.47555	0.561255			16.1768	9.93501	0.614151	-0.703335
Lias	M200006085	ENSMUSG00000029199	NM_024471	0	Lias	lipoic acid synthetase [Source:MarkerSymbol;Acc:MGI:1934604]	GO:0008152(metabolic process);GO:0009105(lipoic acid biosynthetic process);GO:0009107(lipoate biosynthetic process)	GO:0003824(catalytic activity);GO:0005506(iron ion binding);GO:0016992(lipoate synthase activity);GO:0017140(lipoic acid synthase activity);GO:0046872(metal ion binding);GO:0051536(iron-sulfur cluster binding);GO:0051538(3 iron, 4 sulfur cluster binding)	GO:0005739(mitochondrion)	143.516	127.499	0.888401	-0.170717			143.516	124.628	0.868396	-0.203575
Acad9	M200006067	ENSMUSG00000027710	NM_172678	229211	Acad9	acyl-Coenzyme A dehydrogenase family, member 9 [Source:MarkerSymbol;Acc:MGI:1914272]	GO:0006118(electron transport);GO:0008152(metabolic process)	GO:0003995(acyl-CoA dehydrogenase activity);GO:0016491(oxidoreductase activity);GO:0016627(oxidoreductase activity, acting on the CH-CH group of donors);GO:0050660(FAD binding)	GO:0005739(mitochondrion)	126.466	108.622	0.858901	-0.219436			126.466	27.699	0.219023	-2.19084		**
Renbp	M200005925	ENSMUSG00000031387	NM_023132	0	Renbp	renin binding protein [Source:MarkerSymbol;Acc:MGI:105940]	GO:0006013(mannose metabolic process);GO:0006044(N-acetylglucosamine metabolic process)	GO:0003824(catalytic activity);GO:0004476(mannose-6(phosphate isomerase activity);GO:0005515(protein binding);GO:0016853(isomerase activity);GO:0050121(N-acylglucosamine 2(epimerase activity)	GO:0005575(cellular_component)	297.959	450.811	1.51299	0.597406			297.959	42.5514	0.142809	-2.80784		**
Ndufa3	M200010469	ENSMUSG00000035674		0	Ndufa3	NADH dehydrogenase (ubiquinone) 1 alpha subcomplex, 3 [Source:MarkerSymbol;Acc:MGI:1913341]				11.1338	13.4485	1.2079	0.272495			11.1338	11.6889	1.04985	0.0701888
Med25	M200009962	ENSMUSG00000002968	NM_029365	75613	Med25	mediator of RNA polymerase II transcription, subunit 25 homolog (yeast) [Source:MarkerSymbol;Acc:MGI:1922863]				157.364	183.188	1.16411	0.219222			157.364	105.599	0.671048	-0.575512
Il21	M200009944	ENSMUSG00000027718	NM_021782	637754	Il21	interleukin 21 [Source:MarkerSymbol;Acc:MGI:1890474]					3.63485						1.60083
Saps2	M200009770	ENSMUSG00000036561	NM_026813;NM_027805	0	Saps2	SAPS domain family, member 2 [Source:MarkerSymbol;Acc:MGI:1918724]	GO:0043666(regulation of phosphoprotein phosphatase activity)	GO:0005488(binding);GO:0005515(protein binding);GO:0019903(protein phosphatase binding)		18.9391	25.5028	1.34657	0.429288			18.9391	13.9852	0.738433	-0.43746
Utp14a	M200009751	ENSMUSG00000063785	NM_028276	0	Utp14a	UTP14, U3 small nucleolar ribonucleoprotein, homolog A (yeast) [Source:MarkerSymbol;Acc:MGI:1919804]			GO:0005634(nucleus)	70.7087	63.4408	0.897214	-0.156476			70.7087	68.0536	0.96245	-0.0552163
3100002J23Rik	M200009565	ENSMUSG00000049154	XM_484029	75429	3100002J23Rik	RIKEN cDNA 3100002J23 gene [Source:MarkerSymbol;Acc:MGI:1922679]				6.50095	5.93837	0.913462	-0.130584			6.50095	2.24516	0.345359	-1.53383		*
Rps3	M200009543	ENSMUSG00000030744	NM_012052	27050	Rps3	ribosomal protein S3 [Source:MarkerSymbol;Acc:MGI:1350917]	GO:0006412(translation)	GO:0003676(nucleic acid binding);GO:0003723(RNA binding);GO:0003735(structural constituent of ribosome)	GO:0005622(intracellular);GO:0005737(cytoplasm);GO:0005840(ribosome);GO:0005843(cytosolic small ribosomal subunit (sensu Eukaryota));GO:0015935(small ribosomal subunit);GO:0030529(ribonucleoprotein complex)	11734.3	11584	0.987195	-0.0185927			11734.3	5764.54	0.491256	-1.02545		*
2400003C14Rik	M200009397	ENSMUSG00000031729	NM_028018	71955	2400003C14Rik	RIKEN cDNA 2400003C14 gene [Source:MarkerSymbol;Acc:MGI:1919205]		GO:0005515(protein binding)	GO:0005793(ER-Golgi intermediate compartment)	367.732	308.026	0.837638	-0.255602			367.732	264.761	0.719983	-0.473965
Gtpbp3	M200009376	ENSMUSG00000007610	NM_032544	70359	Gtpbp3	GTP binding protein 3 [Source:MarkerSymbol;Acc:MGI:1917609]	GO:0006400(tRNA modification);GO:0008033(tRNA processing)	GO:0000166(nucleotide binding);GO:0003924(GTPase activity);GO:0005525(GTP binding)	GO:0005615(extracellular space);GO:0005622(intracellular);GO:0005739(mitochondrion)	74.3538	83.1303	1.11804	0.160969			74.3538	83.3642	1.12118	0.165022
Zfp336	M200009195									26.5874	25.2851	0.951018	-0.0724553			26.5874	18.6908	0.702992	-0.508419
Rasgef1c	M200009153	ENSMUSG00000020374	XM_126185	0	Rasgef1c	RasGEF domain family, member 1C [Source:MarkerSymbol;Acc:MGI:1921813]	GO:0007264(small GTPase mediated signal transduction);GO:0051056(regulation of small GTPase mediated signal transduction);GO:0051301(cell division)	GO:0005085(guanyl-nucleotide exchange factor activity)	GO:0005622(intracellular)	5.53944	4.3651	0.788002	-0.343728			5.53944	1.14522	0.206739	-2.27412		**
Samd4	M200008913	ENSMUSG00000021838	XM_127686	74480	Samd4	sterile alpha motif domain containing 4 [Source:MarkerSymbol;Acc:MGI:1921730]	GO:0045727(positive regulation of protein biosynthetic process)	GO:0030371(translation repressor activity)	GO:0019717(synaptosome)	50.4497	40.8508	0.809733	-0.304481			50.4497	82.6494	1.63825	0.712159
Gm623	M300022003									3.05661	2.07257	0.678063	-0.560509			3.05661	0.78264	0.256049	-1.96551		*
Kynu	M200008692	ENSMUSG00000026866	NM_027552	70789	Kynu	kynureninase (L-kynurenine hydrolase) [Source:MarkerSymbol;Acc:MGI:1918039]	GO:0006569(tryptophan catabolic process);GO:0008152(metabolic process);GO:0009435(NAD biosynthetic process);GO:0019363(pyridine nucleotide biosynthetic process)	GO:0008483(transaminase activity);GO:0016787(hydrolase activity);GO:0030170(pyridoxal phosphate binding);GO:0030429(kynureninase activity)	GO:0005737(cytoplasm)								0.435483
Tbc1d8	M200008677	ENSMUSG00000003134	NM_018775	54610	Tbc1d8	TBC1 domain family, member 8 [Source:MarkerSymbol;Acc:MGI:1927225]	GO:0008150(biological_process);GO:0032313(regulation of Rab GTPase activity)	GO:0003674(molecular_function);GO:0005096(GTPase activator activity);GO:0005097(Rab GTPase activator activity)	GO:0005575(cellular_component);GO:0005622(intracellular);GO:0016020(membrane);GO:0016021(integral to membrane)	6.14062	13.9491	2.27161	1.18371	*		6.14062	4.7606	0.775264	-0.367241
2410131K14Rik	M200008520	ENSMUSG00000032840	XM_485677	76792	2410131K14Rik	RIKEN cDNA 2410131K14 gene [Source:MarkerSymbol;Acc:MGI:1924042]				10.8535	9.18767	0.846521	-0.240383			10.8535	15.5711	1.43467	0.52072
Taf7l	M200008505	ENSMUSG00000009596	NM_028958	74469	Taf7l	TAF7-like RNA polymerase II, TATA box binding protein (TBP)-associated factor [Source:MarkerSymbol;Acc:MGI:1921719]	GO:0008150(biological_process);GO:0045449(regulation of transcription)	GO:0003674(molecular_function);GO:0003700(transcription factor activity)	GO:0005575(cellular_component);GO:0005634(nucleus)		3.41262						2.39296
3222401M22Rik	M200008319									8.25792	18.3786	2.22557	1.15417	*		8.25792	5.20797	0.630664	-0.665057
Fbxo32	M200008286	ENSMUSG00000022358	NM_026346	67731	Fbxo32	F-box protein 32 [Source:MarkerSymbol;Acc:MGI:1914981]	GO:0006512(ubiquitin cycle);GO:0008150(biological_process)	GO:0005515(protein binding)	GO:0005634(nucleus)	14.3822	49.4317	3.437	1.78115	*		14.3822	18.4736	1.28447	0.361176
Tmem43	M200008116	ENSMUSG00000030095	NM_028766	74122	Tmem43	transmembrane protein 43 [Source:MarkerSymbol;Acc:MGI:1921372]			GO:0016021(integral to membrane)	397.877	244.103	0.613512	-0.704836			397.877	373.457	0.938623	-0.0913822
Rgs9	M200008094	ENSMUSG00000020599	NM_011268	0	Rgs9	regulator of G-protein signaling 9 [Source:MarkerSymbol;Acc:MGI:1338824]				9.89703	13.3945	1.35338	0.436572			9.89703	11.9906	1.21153	0.276831
Narf	M200007939	ENSMUSG00000000056	NM_026272	67608	Narf	nuclear prelamin A recognition factor [Source:MarkerSymbol;Acc:MGI:1914858]		GO:0005515(protein binding)	GO:0005638(lamin filament);GO:0031981(nuclear lumen)	10.2626	12.4317	1.21136	0.276632			10.2626	5.41557	0.527701	-0.922207
Zhx1	M200007919	ENSMUSG00000022361	NM_009572	22770	Zhx1	zinc fingers and homeoboxes protein 1 [Source:MarkerSymbol;Acc:MGI:109271]	GO:0006350(transcription);GO:0006355(regulation of transcription, DNA-dependent);GO:0045449(regulation of transcription);GO:0045892(negative regulation of transcription, DNA-dependent)	GO:0003676(nucleic acid binding);GO:0003677(DNA binding);GO:0003700(transcription factor activity);GO:0005515(protein binding);GO:0008270(zinc ion binding);GO:0043565(sequence-specific DNA binding);GO:0046872(metal ion binding)	GO:0005622(intracellular);GO:0005634(nucleus);GO:0005667(transcription factor complex)	67.1615	83.5041	1.24333	0.314213			67.1615	44.3743	0.66071	-0.597911
Icos	M200013856	ENSMUSG00000026009	NM_017480	100048841	Icos	inducible T-cell co-stimulator [Source:MarkerSymbol;Acc:MGI:1858745]		GO:0005515(protein binding)	GO:0005887(integral to plasma membrane);GO:0009897(external side of plasma membrane);GO:0016020(membrane);GO:0016021(integral to membrane)	10.5843	10.6441	1.00565	0.00812633			10.5843	11.0948	1.04822	0.0679459
Gria3	M200013837	ENSMUSG00000001986	NM_016886	53623	Gria3	glutamate receptor, ionotropic, AMPA3 (alpha 3) [Source:MarkerSymbol;Acc:MGI:95810]	GO:0006810(transport);GO:0006811(ion transport)	GO:0003824(catalytic activity);GO:0004872(receptor activity);GO:0004970(ionotropic glutamate receptor activity);GO:0005215(transporter activity);GO:0005216(ion channel activity);GO:0005234(glutamate-gated ion channel activity);GO:0005515(protein binding)	GO:0016020(membrane);GO:0016021(integral to membrane);GO:0045211(postsynaptic membrane)	16.6308	15.4684	0.930101	-0.10454			16.6308	26.5536	1.59665	0.675051
3110003A22Rik	M200013684	ENSMUSG00000028243	NM_026534	68053	3110003A22Rik	RIKEN cDNA 3110003A22 gene [Source:MarkerSymbol;Acc:MGI:1915303]				24.3005	28.8495	1.1872	0.247559			24.3005	18.5151	0.76192	-0.392288
Zcchc12	M200013665	ENSMUSG00000036699	NM_028325	0	Zcchc12	zinc finger, CCHC domain containing 12 [Source:MarkerSymbol;Acc:MGI:1919943]		GO:0003676(nucleic acid binding);GO:0008270(zinc ion binding);GO:0046872(metal ion binding)		10.1197	9.18603	0.90774	-0.13965			10.1197	7.01765	0.693466	-0.528103
2900002H16Rik	M200013516	ENSMUSG00000029392	NM_021430	75695	2900002H16Rik	RIKEN cDNA 2900002H16 gene [Source:MarkerSymbol;Acc:MGI:1922945]				72.0671	129.094	1.79131	0.841014			72.0671	43.121	0.598345	-0.74095
9030617O03Rik	M200013484	ENSMUSG00000021185	NM_145448	0	9030617O03Rik	RIKEN cDNA 9030617O03 gene [Source:MarkerSymbol;Acc:MGI:2444813]			GO:0005739(mitochondrion)	94.6955	93.8277	0.990836	-0.0132813			94.6955	105.393	1.11297	0.154415
Cox15	M200013248	ENSMUSG00000040018	NM_144874	226139	Cox15	COX15 homolog, cytochrome c oxidase assembly protein (yeast) [Source:MarkerSymbol;Acc:MGI:1920112]	GO:0006461(protein complex assembly);GO:0006784(heme a biosynthetic process);GO:0008535(cytochrome c oxidase complex assembly)	GO:0003674(molecular_function)	GO:0005739(mitochondrion);GO:0005743(mitochondrial inner membrane);GO:0016020(membrane);GO:0016021(integral to membrane);GO:0044429(mitochondrial part)	130.073	131.216	1.00879	0.0126233			130.073	103.988	0.79946	-0.322901
-	M200013220									5.20704	5.65328	1.0857	0.118624			5.20704	9.81724	1.88538	0.914854
Mylk2	M200013016	ENSMUSG00000027470		0	Mylk2	myosin, light polypeptide kinase 2, skeletal muscle [Source:MarkerSymbol;Acc:MGI:2139434]				53.8118	26.0663	0.484397	-1.04574		*	53.8118	42.1864	0.783961	-0.351145
4930425F17Rik	M200012989	ENSMUSG00000062501		78107	4930425F17Rik	RIKEN cDNA 4930425F17 gene [Source:MarkerSymbol;Acc:MGI:1925357]				37.0199	28.7562	0.776776	-0.36443			37.0199	23.5002	0.634799	-0.655628
Bicd2	M200012788	ENSMUSG00000037933	NM_029791	0	Bicd2	bicaudal D homolog 2 (Drosophila) [Source:MarkerSymbol;Acc:MGI:1924145]	GO:0007018(microtubule-based movement)	GO:0005515(protein binding)	GO:0005794(Golgi apparatus);GO:0005856(cytoskeleton)	84.1421	139.632	1.65948	0.730735			84.1421	81.7759	0.971879	-0.0411516
Abcg2	M200012772	ENSMUSG00000029802	NM_011920	0	Abcg2	ATP-binding cassette, sub-family G (WHITE), member 2 [Source:MarkerSymbol;Acc:MGI:1347061]	GO:0006810(transport)	GO:0000166(nucleotide binding);GO:0005524(ATP binding);GO:0016887(ATPase activity);GO:0017111(nucleoside-triphosphatase activity)	GO:0016020(membrane);GO:0016021(integral to membrane)	494.526	339.555	0.686629	-0.542398			494.526	477.306	0.96518	-0.0511299
Idh3a	M200012512	ENSMUSG00000032279	NM_029573	67834	Idh3a	isocitrate dehydrogenase 3 (NAD+) alpha [Source:MarkerSymbol;Acc:MGI:1915084]	GO:0006099(tricarboxylic acid cycle);GO:0008152(metabolic process);GO:0044262(cellular carbohydrate metabolic process)	GO:0004449(isocitrate dehydrogenase (NAD+) activity);GO:0004450(isocitrate dehydrogenase (NADP+) activity);GO:0016491(oxidoreductase activity);GO:0016616(oxidoreductase activity, acting on the CH-OH group of donors, NAD or NADP as acceptor)	GO:0005739(mitochondrion)	678.759	412.221	0.607316	-0.71948			678.759	368.326	0.542646	-0.881916
Tex10	M200012473	ENSMUSG00000028345	XM_485378	269536	Tex10	testis expressed gene 10 [Source:MarkerSymbol;Acc:MGI:1344413]				115.138	91.0236	0.790562	-0.339049			115.138	94.5612	0.821287	-0.284042
2510039O18Rik	M200012134	ENSMUSG00000044496	NM_029841	77034	2510039O18Rik	RIKEN cDNA 2510039O18 gene [Source:MarkerSymbol;Acc:MGI:1924284]				199.659	176.381	0.883412	-0.178842			199.659	143.164	0.717041	-0.479873
Slc12a3	M200012108	ENSMUSG00000031766	NM_019415	20497	Slc12a3	solute carrier family 12, member 3 [Source:MarkerSymbol;Acc:MGI:108114]	GO:0006810(transport);GO:0006811(ion transport);GO:0006814(sodium ion transport);GO:0006821(chloride transport);GO:0006865(amino acid transport)	GO:0005215(transporter activity);GO:0005279(amino acid-polyamine transporter activity);GO:0005386(carrier activity);GO:0015293(symporter activity);GO:0015377(cation:chloride symporter activity);GO:0031402(sodium ion binding)	GO:0005887(integral to plasma membrane);GO:0016020(membrane);GO:0016021(integral to membrane)	2.91082	2.68306	0.921752	-0.11755			2.91082	3.07556	1.0566	0.0794231
Them5	M200011935	ENSMUSG00000028148	NM_025416	66198	Them5	thioesterase superfamily member 5 [Source:MarkerSymbol;Acc:MGI:1913448]		GO:0003824(catalytic activity)		4.10581	4.08171	0.994129	-0.00849551			4.10581	1.87037	0.455542	-1.13434		*
Srgap1	M200011901	ENSMUSG00000020121		117600	Srgap1	SLIT-ROBO Rho GTPase activating protein 1 [Source:MarkerSymbol;Acc:MGI:2152936]	GO:0007165(signal transduction);GO:0007266(Rho protein signal transduction);GO:0016477(cell migration)	GO:0005096(GTPase activator activity);GO:0005100(Rho GTPase activator activity);GO:0005515(protein binding);GO:0017048(Rho GTPase binding)	GO:0005575(cellular_component);GO:0005622(intracellular)	3.84217	2.01284	0.523881	-0.93269			3.84217	2.54076	0.661284	-0.596658
Dhx38	M200011691	ENSMUSG00000037993	NM_178380	64340	Dhx38	DEAH (Asp-Glu-Ala-His) box polypeptide 38 [Source:MarkerSymbol;Acc:MGI:1927617]		GO:0003676(nucleic acid binding);GO:0004386(helicase activity);GO:0005524(ATP binding);GO:0008026(ATP-dependent helicase activity)		10.8888	7.73121	0.710013	-0.494083			10.8888	6.22048	0.571272	-0.807751
Scara5	M200011665	ENSMUSG00000022032		0	Scara5	scavenger receptor class A, member 5 (putative) [Source:MarkerSymbol;Acc:MGI:1918395]				7.77783	4.36866	0.561682	-0.832175			7.77783	8.96078	1.15209	0.204256
4930578C19Rik	M200011076	ENSMUSG00000037358	NM_175228	75905	4930578C19Rik	RIKEN cDNA 4930578C19 gene [Source:MarkerSymbol;Acc:MGI:1923155]		GO:0016787(hydrolase activity)		2.09227	2.12704	1.01662	0.0237802			2.09227	1.30019	0.621428	-0.686341
Cdyl2	M200011041									7.32146	6.71928	0.917752	-0.123824			7.32146	4.06762	0.555575	-0.847947
3110018I06Rik	M200010582	ENSMUSG00000060375		0	3110018I06Rik	RIKEN cDNA 3110018I06 gene [Source:MarkerSymbol;Acc:MGI:1920410]				4.07082	7.39936	1.81766	0.862082			4.07082	9.81938	2.41214	1.27031	*
Dlat	M300000032	ENSMUSG00000000168	NM_145614	235339	Dlat	dihydrolipoamide S-acetyltransferase (E2 component of pyruvate dehydrogenase complex) [Source:MarkerSymbol;Acc:MGI:2385311]	GO:0006086(acetyl-CoA biosynthetic process from pyruvate);GO:0006096(glycolysis);GO:0008152(metabolic process)	GO:0004742(dihydrolipoyllysine-residue acetyltransferase activity);GO:0005515(protein binding);GO:0008415(acyltransferase activity);GO:0016740(transferase activity);GO:0031405(lipoic acid binding)	GO:0005739(mitochondrion);GO:0005967(mitochondrial pyruvate dehydrogenase complex);GO:0045254(pyruvate dehydrogenase complex)	457.672	373.284	0.815615	-0.29404			457.672	131.426	0.287161	-1.80007		*
-	M200016188									1.97724	2.29481	1.16061	0.214886			1.97724	0.737191	0.372838	-1.42338		*
2310079F23Rik	M200016167	ENSMUSG00000029097	NM_030208	78890	2310079F23Rik	RIKEN cDNA 2310079F23 gene [Source:MarkerSymbol;Acc:MGI:1926140]		GO:0008168(methyltransferase activity);GO:0016740(transferase activity)		32.8993	31.616	0.960992	-0.0574032			32.8993	28.8843	0.877963	-0.187769
Hsf4	M200015982	ENSMUSG00000033249	NM_011939	0	Hsf4	heat shock transcription factor 4 [Source:MarkerSymbol;Acc:MGI:1347058]	GO:0006350(transcription);GO:0006355(regulation of transcription, DNA-dependent);GO:0006457(protein folding);GO:0006986(response to unfolded protein);GO:0008284(positive regulation of cell proliferation);GO:0043010(camera-type eye development);GO:0045597(positive regulation of cell differentiation);GO:0048468(cell development)	GO:0003677(DNA binding);GO:0003700(transcription factor activity);GO:0043565(sequence-specific DNA binding)	GO:0005634(nucleus)	7.65166	4.64707	0.607328	-0.719452			7.65166	2.4323	0.317879	-1.65345		*
Slc12a5	M200015957	ENSMUSG00000017740	NM_020333	57138	Slc12a5	solute carrier family 12, member 5 [Source:MarkerSymbol;Acc:MGI:1862037]	GO:0006810(transport);GO:0006811(ion transport);GO:0006813(potassium ion transport);GO:0006814(sodium ion transport);GO:0006821(chloride transport);GO:0006873(cell ion homeostasis);GO:0007268(synaptic transmission)	GO:0005215(transporter activity);GO:0015293(symporter activity);GO:0015377(cation:chloride symporter activity);GO:0015379(potassium:chloride symporter activity);GO:0030955(potassium ion binding)	GO:0005886(plasma membrane);GO:0016020(membrane);GO:0016021(integral to membrane)	12.5019	9.69738	0.775673	-0.36648			12.5019	9.64659	0.771611	-0.374055
2610203E10Rik	M200015784	ENSMUSG00000040272		329470	2610203E10Rik	RIKEN cDNA 2610203E10 gene [Source:MarkerSymbol;Acc:MGI:1919717]	GO:0009058(biosynthetic process)	GO:0008483(transaminase activity);GO:0016847(1(aminocyclopropane-1(carboxylate synthase activity)		22.3634	23.1407	1.03475	0.0492892			22.3634	17.7506	0.793733	-0.333275
Cldn13	M200015751	ENSMUSG00000008843	NM_020504	57255	Cldn13	claudin 13 [Source:MarkerSymbol;Acc:MGI:1913102]		GO:0005198(structural molecule activity)	GO:0005615(extracellular space);GO:0005923(tight junction);GO:0016020(membrane);GO:0016021(integral to membrane)	4.88942	3.85828	0.789108	-0.341705			4.88942	2.09125	0.42771	-1.22529		*
4931414P19Rik	M200015541	ENSMUSG00000022179	NM_028890	74359	4931414P19Rik	RIKEN cDNA 4931414P19 gene [Source:MarkerSymbol;Acc:MGI:1921609]				72.2119	72.6833	1.00653	0.00938623			72.2119	87.0301	1.2052	0.269276
Cdc37l1	M200015508	ENSMUSG00000024780	NM_025950	67072	Cdc37l1	cell division cycle 37 homolog (S. cerevisiae)-like 1 [Source:MarkerSymbol;Acc:MGI:1914322]	GO:0000074(regulation of progression through cell cycle);GO:0000910(cytokinesis);GO:0051301(cell division)	GO:0005515(protein binding)	GO:0005737(cytoplasm)	100.933	100.392	0.99464	-0.00775306			100.933	74.4747	0.737866	-0.43857
-	M200015305									4.9514	3.69267	0.745782	-0.423174			4.9514	6.81829	1.37704	0.461574
BC010462	M200015271										3.41573
4930430O22Rik	M200015061	ENSMUSG00000057354		0	4930430O22Rik	RIKEN cDNA 4930430O22 gene [Source:MarkerSymbol;Acc:MGI:1925404]				10.8773	8.73414	0.802971	-0.316579			10.8773	6.01899	0.553355	-0.853723
2310061N02Rik	M200015024	ENSMUSG00000050704	XM_489599	69661	2310061N02Rik	RIKEN cDNA 2310061N02 gene [Source:MarkerSymbol;Acc:MGI:1916911]				2.92434	1.73183	0.592211	-0.755817			2.92434	1.05325	0.360167	-1.47326		*
Iqgap1	M200014838	ENSMUSG00000030536	NM_016721	29875	Iqgap1	IQ motif containing GTPase activating protein 1 [Source:MarkerSymbol;Acc:MGI:1352757]	GO:0007264(small GTPase mediated signal transduction);GO:0046580(negative regulation of Ras protein signal transduction);GO:0051056(regulation of small GTPase mediated signal transduction)	GO:0005096(GTPase activator activity);GO:0005099(Ras GTPase activator activity);GO:0005516(calmodulin binding)	GO:0005622(intracellular);GO:0005737(cytoplasm);GO:0016020(membrane)	674.455	459.493	0.68128	-0.55368			674.455	446.459	0.661955	-0.595195
Slc22a16	M200014804	ENSMUSG00000019834		70840	Slc22a16	solute carrier family 22 (organic cation transporter), member 16 [Source:MarkerSymbol;Acc:MGI:1918090]				3.62894	3.74713	1.03257	0.0462407			3.62894	1.35282	0.372786	-1.42358		*
Dnajb4	M200014597	ENSMUSG00000028035	NM_025926	0	Dnajb4	DnaJ (Hsp40) homolog, subfamily B, member 4 [Source:MarkerSymbol;Acc:MGI:1914285]	GO:0006457(protein folding)	GO:0031072(heat shock protein binding);GO:0051082(unfolded protein binding)		661.919	366.309	0.553405	-0.853593			661.919	490.06	0.740362	-0.433698
Tmem144	M200014568	ENSMUSG00000027956	NM_027495	70652	Tmem144	transmembrane protein 144 [Source:MarkerSymbol;Acc:MGI:1917902]				18.6253	12.0508	0.647015	-0.628129			18.6253	32.1467	1.72597	0.787411
9830002I17Rik	M200014425	ENSMUSG00000020798	XM_126365	0	9830002I17Rik	RIKEN cDNA 9830002I17 gene [Source:MarkerSymbol;Acc:MGI:1924827]	GO:0006810(transport);GO:0015904(tetracycline transport)	GO:0004867(serine-type endopeptidase inhibitor activity);GO:0005215(transporter activity);GO:0015520(tetracycline:hydrogen antiporter activity)	GO:0016020(membrane);GO:0016021(integral to membrane)	4.88849	5.09488	1.04222	0.0596612			4.88849	1.20609	0.24672	-2.01905		**
Insl6	M200014409	ENSMUSG00000050957	NM_013754	27356	Insl6	insulin-like 6 [Source:MarkerSymbol;Acc:MGI:1351595]		GO:0005179(hormone activity)	GO:0005576(extracellular region);GO:0005615(extracellular space)	15.1254	11.5949	0.766586	-0.38348			15.1254
Defb4	M200014229	ENSMUSG00000059230	NM_019728	56519	Defb4	defensin beta 4 [Source:MarkerSymbol;Acc:MGI:1927667]	GO:0006952(defense response);GO:0042742(defense response to bacterium)		GO:0005576(extracellular region);GO:0005615(extracellular space)	9.81934	8.12071	0.827012	-0.27402			9.81934	12.3138	1.25404	0.326578
Slc26a6	M200014210	ENSMUSG00000023259	NM_134420	171429	Slc26a6	solute carrier family 26, member 6 [Source:MarkerSymbol;Acc:MGI:2159728]	GO:0006810(transport);GO:0006821(chloride transport);GO:0008272(sulfate transport);GO:0015701(bicarbonate transport);GO:0015724(formate transport)	GO:0005215(transporter activity);GO:0008271(sulfate porter activity);GO:0015108(chloride transporter activity);GO:0015380(anion exchanger activity);GO:0015499(formate transporter activity)	GO:0005624(membrane fraction);GO:0005887(integral to plasma membrane);GO:0016020(membrane)	9.4449	8.74014	0.925382	-0.111879			9.4449	5.47034	0.579184	-0.787906
9130213B05Rik	M200014054	ENSMUSG00000034981	NM_145562	231440	9130213B05Rik	RIKEN cDNA 9130213B05 gene [Source:MarkerSymbol;Acc:MGI:2443349]			GO:0005615(extracellular space);GO:0016020(membrane);GO:0016021(integral to membrane)	2.41497	1.78652	0.73977	-0.434852			2.41497	62.8061	26.007	4.70083	***
Vdr	M200014038	ENSMUSG00000022479	NM_009504	22337	Vdr	vitamin D receptor [Source:MarkerSymbol;Acc:MGI:103076]	GO:0001501(skeletal development);GO:0006350(transcription);GO:0006355(regulation of transcription, DNA-dependent);GO:0006816(calcium ion transport);GO:0006874(calcium ion homeostasis);GO:0007275(multicellular organismal development);GO:0009887(organ morphogenesis);GO:0016481(negative regulation of transcription);GO:0050892(intestinal absorption)	GO:0003677(DNA binding);GO:0003700(transcription factor activity);GO:0003707(steroid hormone receptor activity);GO:0004872(receptor activity);GO:0004879(ligand-dependent nuclear receptor activity);GO:0005515(protein binding);GO:0008270(zinc ion binding);GO:0030528(transcription regulator activity);GO:0043565(sequence-specific DNA binding);GO:0046872(metal ion binding)	GO:0005634(nucleus)	11.6721	25.8399	2.21383	1.14654	*		11.6721	18.6403	1.597	0.675364
2310010B21Rik	M300002811									57.4083	36.0373	0.627737	-0.671769			57.4083	64.3438	1.12081	0.164544
Cts7	M300002759	ENSMUSG00000021440	NM_019539	56092	Cts7	cathepsin 7 [Source:MarkerSymbol;Acc:MGI:1860262]	GO:0006508(proteolysis)	GO:0004197(cysteine-type endopeptidase activity);GO:0004217(cathepsin L activity);GO:0008233(peptidase activity);GO:0008234(cysteine-type peptidase activity);GO:0016787(hydrolase activity)	GO:0005615(extracellular space)	3.12181	2.96458	0.949634	-0.0745562			3.12181	2.11625	0.677891	-0.560875
Max	M300002537	ENSMUSG00000059436	NM_008558	100048299	Max	Max protein [Source:MarkerSymbol;Acc:MGI:96921]	GO:0006350(transcription);GO:0006355(regulation of transcription, DNA-dependent);GO:0045449(regulation of transcription)	GO:0003677(DNA binding);GO:0003700(transcription factor activity);GO:0005515(protein binding);GO:0030528(transcription regulator activity)	GO:0005634(nucleus)	135.487	116.597	0.860571	-0.216634			135.487	154.304	1.13888	0.187621
Creg1	M200000170									88.1711	97.2977	1.10351	0.1421			88.1711	101.475	1.15089	0.202752
Rnf144	M300002301	ENSMUSG00000020642		108089	Rnf144	ring finger protein 144 [Source:MarkerSymbol;Acc:MGI:1344401]	GO:0006512(ubiquitin cycle)	GO:0005515(protein binding);GO:0008270(zinc ion binding);GO:0046872(metal ion binding)	GO:0005634(nucleus);GO:0005794(Golgi apparatus);GO:0016021(integral to membrane)	3.19536	2.90796	0.910057	-0.135972			3.19536	1.97058	0.616702	-0.697354
Gna13	M300002274	ENSMUSG00000020611	NM_010303	14674	Gna13	guanine nucleotide binding protein, alpha 13 [Source:MarkerSymbol;Acc:MGI:95768]	GO:0001525(angiogenesis);GO:0001569(patterning of blood vessels);GO:0001701(in utero embryonic development);GO:0007165(signal transduction);GO:0007186(G-protein coupled receptor protein signaling pathway);GO:0007243(protein kinase cascade);GO:0007266(Rho protein signal transduction);GO:0008360(regulation of cell shape);GO:0030154(cell differentiation);GO:0030168(platelet activation);GO:0030334(re…	GO:0000166(nucleotide binding);GO:0003924(GTPase activity);GO:0004871(signal transducer activity);GO:0005515(protein binding);GO:0005525(GTP binding);GO:0019001(guanyl nucleotide binding)	GO:0005834(heterotrimeric G-protein complex);GO:0016020(membrane)	120.267	125.31	1.04193	0.0592618			120.267	110.828	0.921518	-0.117916
9530003J23Rik	M300002045	ENSMUSG00000020177	NM_029906	77397	9530003J23Rik	RIKEN cDNA 9530003J23 gene [Source:MarkerSymbol;Acc:MGI:1924647]	GO:0006605(protein targeting);GO:0016998(cell wall catabolic process)	GO:0003796(lysozyme activity)	GO:0005576(extracellular region);GO:0005615(extracellular space)	2.21526	3.01978	1.36317	0.446969			2.21526	2.41902	1.09198	0.126949
2310011J03Rik	M300002018	ENSMUSG00000020133	NM_025521	66374	2310011J03Rik	RIKEN cDNA 2310011J03 gene [Source:MarkerSymbol;Acc:MGI:1913624]				309.039	312.733	1.01195	0.0171417			309.039	277.58	0.898203	-0.154887
Sec14l4	M300001784	ENSMUSG00000019368	NM_146013	103655	Sec14l4	SEC14-like 4 (S. cerevisiae) [Source:MarkerSymbol;Acc:MGI:2144095]	GO:0006810(transport)	GO:0005215(transporter activity);GO:0008289(lipid binding)	GO:0005622(intracellular);GO:0016021(integral to membrane)	10.2594	9.2388	0.900524	-0.151163			10.2594	7.45174	0.726336	-0.461291
Cdca7	M300001755	ENSMUSG00000055612	NM_025866	66953	Cdca7	cell division cycle associated 7 [Source:MarkerSymbol;Acc:MGI:1914203]				98.7956	38.2247	0.386907	-1.36994		*	98.7956	87.3113	0.883757	-0.178278
Plcg1	M300001540	ENSMUSG00000016933	NM_021280	18803	Plcg1	phospholipase C, gamma 1 [Source:MarkerSymbol;Acc:MGI:97615]	GO:0001701(in utero embryonic development);GO:0006629(lipid metabolic process);GO:0007165(signal transduction);GO:0007242(intracellular signaling cascade);GO:0016042(lipid catabolic process)	GO:0004435(phosphoinositide phospholipase C activity);GO:0004629(phospholipase C activity);GO:0004871(signal transducer activity);GO:0005509(calcium ion binding);GO:0005515(protein binding);GO:0016787(hydrolase activity)	GO:0005575(cellular_component)	20.5576	23.0317	1.12035	0.163951			20.5576	9.02775	0.439144	-1.18723		*
Gtf3a	M300001521	ENSMUSG00000016503	NM_025652	0	Gtf3a	general transcription factor III A [Source:MarkerSymbol;Acc:MGI:1913846]		GO:0003677(DNA binding);GO:0008270(zinc ion binding);GO:0046872(metal ion binding)	GO:0005622(intracellular)	285.84	266.272	0.931542	-0.102308			285.84	235.006	0.822158	-0.282513
Ndufa2	M300001272	ENSMUSG00000014294	NM_010885	17991	Ndufa2	NADH dehydrogenase (ubiquinone) 1 alpha subcomplex, 2 [Source:MarkerSymbol;Acc:MGI:1343103]				1356.74	1885.94	1.39005	0.475133			1356.74	1762.05	1.29873	0.377105
Ehmt2	M300001240	ENSMUSG00000013787	NM_145830;NM_147151	110147	Ehmt2	euchromatic histone lysine N-methyltransferase 2 [Source:MarkerSymbol;Acc:MGI:2148922]	GO:0016568(chromatin modification)	GO:0008168(methyltransferase activity);GO:0008270(zinc ion binding);GO:0016740(transferase activity);GO:0018024(histone-lysine N-methyltransferase activity)	GO:0005634(nucleus)	346.757	393.728	1.13546	0.183276			346.757	329.899	0.951385	-0.071899
Trpm5	M300001019	ENSMUSG00000009246	NM_020277	56843	Trpm5	transient receptor potential cation channel, subfamily M, member 5 [Source:MarkerSymbol;Acc:MGI:1861718]	GO:0006810(transport);GO:0006811(ion transport);GO:0008150(biological_process)	GO:0004872(receptor activity);GO:0005216(ion channel activity)	GO:0016020(membrane);GO:0016021(integral to membrane)	4.89039	7.61055	1.55622	0.63805			4.89039	10.1665	2.07888	1.05581	*
Rala	M300000994	ENSMUSG00000008859	NM_019491	0	Rala	v-ral simian leukemia viral oncogene homolog A (ras related) [Source:MarkerSymbol;Acc:MGI:1927243]	GO:0007264(small GTPase mediated signal transduction)	GO:0000166(nucleotide binding);GO:0003924(GTPase activity);GO:0005515(protein binding);GO:0005525(GTP binding)	GO:0005622(intracellular);GO:0016020(membrane)	188.549	202.592	1.07448	0.103637			188.549	153.277	0.812927	-0.298803
Zbtb32	M300000779	ENSMUSG00000006310	NM_021397	0	Zbtb32	zinc finger and BTB domain containing 32 [Source:MarkerSymbol;Acc:MGI:1891838]	GO:0001817(regulation of cytokine production);GO:0006350(transcription);GO:0006355(regulation of transcription, DNA-dependent);GO:0030097(hemopoiesis);GO:0042098(T cell proliferation)	GO:0003676(nucleic acid binding);GO:0003714(transcription corepressor activity);GO:0005515(protein binding);GO:0008270(zinc ion binding);GO:0046872(metal ion binding)	GO:0000228(nuclear chromosome);GO:0005622(intracellular);GO:0005634(nucleus)	5.3779	3.80472	0.707472	-0.499254			5.3779	3.45092	0.641685	-0.640062
Dhx34	M300000746									82.1406	47.0828	0.573197	-0.802896			82.1406	55.2763	0.672947	-0.571435
-	M300000540									12.832	9.80609	0.76419	-0.387997			12.832	15.9353	1.24184	0.312479
Gstm5	M300000499	ENSMUSG00000004032	NM_010360	14866	Gstm5	glutathione S-transferase, mu 5 [Source:MarkerSymbol;Acc:MGI:1309466]	GO:0008152(metabolic process)	GO:0004364(glutathione transferase activity);GO:0016740(transferase activity)		312.549	405.663	1.29792	0.376203			312.549	248.602	0.795402	-0.330243
2310004L02Rik	M300000277	ENSMUSG00000057229	NM_025504	66349	2310004L02Rik	RIKEN cDNA 2310004L02 gene [Source:MarkerSymbol;Acc:MGI:1913599]				97.1006	113.723	1.17119	0.227972			97.1006	81.4405	0.838722	-0.253735
Rpl10	M300000252	ENSMUSG00000060879	XM_138143	0	Rpl10	ribosomal protein 10 [Source:MarkerSymbol;Acc:MGI:105943]				4.59044	7.62012	1.66	0.731182			4.59044	6.0312	1.31386	0.393813
Mx1	M300000067	ENSMUSG00000000386		0	Mx1	myxovirus (influenza virus) resistance 1 [Source:MarkerSymbol;Acc:MGI:97243]	GO:0006955(immune response);GO:0009615(response to virus);GO:0045087(innate immune response)	GO:0000166(nucleotide binding);GO:0003924(GTPase activity);GO:0005515(protein binding);GO:0005525(GTP binding)	GO:0005634(nucleus)	9.63441	8.73821	0.90698	-0.140857			9.63441	4.02003	0.417258	-1.26099		*
Kcnq5	M300005910	ENSMUSG00000028033	XM_129704	226922	Kcnq5	potassium voltage-gated channel, subfamily Q, member 5 [Source:MarkerSymbol;Acc:MGI:1924937]	GO:0006810(transport);GO:0006811(ion transport);GO:0006813(potassium ion transport)	GO:0005216(ion channel activity);GO:0005244(voltage-gated ion channel activity);GO:0005249(voltage-gated potassium channel activity);GO:0005267(potassium channel activity);GO:0030955(potassium ion binding)	GO:0008076(voltage-gated potassium channel complex);GO:0016020(membrane);GO:0016021(integral to membrane)	3.35885	2.18151	0.649481	-0.62264			3.35885	4.18218	1.24512	0.316288
Stx16	M300005676	ENSMUSG00000027522	NM_172675	228960	Stx16	syntaxin 16 [Source:MarkerSymbol;Acc:MGI:1923396]	GO:0006810(transport);GO:0006886(intracellular protein transport);GO:0006891(intra-Golgi vesicle-mediated transport);GO:0015031(protein transport)	GO:0005484(SNAP receptor activity);GO:0005486(t-SNARE activity);GO:0008565(protein transporter activity)	GO:0005737(cytoplasm);GO:0005792(microsome);GO:0005794(Golgi apparatus);GO:0005795(Golgi stack);GO:0016020(membrane);GO:0016021(integral to membrane)	25.008	20.1661	0.806387	-0.310456			25.008	19.7391	0.789313	-0.341331
Xrn2	M300005643	ENSMUSG00000027433		24128	Xrn2	5'-3' exoribonuclease 2 [Source:MarkerSymbol;Acc:MGI:894687]	GO:0000738(DNA catabolic process, exonucleolytic);GO:0006281(DNA repair);GO:0006310(DNA recombination);GO:0006350(transcription);GO:0006353(transcription termination);GO:0006355(regulation of transcription, DNA-dependent);GO:0006397(mRNA processing);GO:0007017(microtubule-based process);GO:0007283(spermatogenesis);GO:0016049(cell growth);GO:0016070(RNA metabolic process)	GO:0003676(nucleic acid binding);GO:0004518(nuclease activity);GO:0004527(exonuclease activity);GO:0004534(5'-3' exoribonuclease activity);GO:0005515(protein binding);GO:0008270(zinc ion binding);GO:0016787(hydrolase activity);GO:0046872(metal ion binding)	GO:0005622(intracellular);GO:0005634(nucleus);GO:0005730(nucleolus)	469.178	339.799	0.724243	-0.465455			469.178	392.324	0.836193	-0.258092
Zfp533	M300005438	ENSMUSG00000027016	NM_178723	0	Zfp533	zinc finger protein 533 [Source:MarkerSymbol;Acc:MGI:2444734]	GO:0008150(biological_process)	GO:0003674(molecular_function);GO:0003676(nucleic acid binding);GO:0008270(zinc ion binding);GO:0046872(metal ion binding)	GO:0005575(cellular_component);GO:0005622(intracellular);GO:0005634(nucleus)	21.0541	19.111	0.90771	-0.139697			21.0541	18.2992	0.869153	-0.202318
Smr3	M400001156									109.067	92.4359	0.847515	-0.238689			109.067	76.3434	0.699968	-0.514639
Sacy	M300005181	ENSMUSG00000026567	NM_173029	271639	Sacy	soluble adenylyl cyclase [Source:MarkerSymbol;Acc:MGI:2660854]	GO:0007242(intracellular signaling cascade);GO:0009190(cyclic nucleotide biosynthetic process)	GO:0004016(adenylate cyclase activity);GO:0004383(guanylate cyclase activity)	GO:0005737(cytoplasm)	8.06236	8.40007	1.04189	0.0591997			8.06236	7.22525	0.896171	-0.158155
Srp9	M300005153	ENSMUSG00000026511		0	Srp9	signal recognition particle 9 [Source:MarkerSymbol;Acc:MGI:1350930]	GO:0006605(protein targeting);GO:0045900(negative regulation of translational elongation)	GO:0003723(RNA binding)	GO:0005786(signal recognition particle, endoplasmic reticulum targeting);GO:0030529(ribonucleoprotein complex)	326.446	366.415	1.12244	0.166635			326.446	282.526	0.86546	-0.20846
1700019A02Rik	M300004934	ENSMUSG00000060715		69397	1700019A02Rik	RIKEN cDNA 1700019A02 gene [Source:MarkerSymbol;Acc:MGI:1916647]					1.61807						0.991311
Sgol2	M300004914									56.9888	29.7612	0.522229	-0.937245			56.9888	19.6068	0.344046	-1.53933		*
Fgf14	M300004689	ENSMUSG00000025551	NM_010201;NM_207667	14169	Fgf14	fibroblast growth factor 14 [Source:MarkerSymbol;Acc:MGI:109189]		GO:0008083(growth factor activity)		3.44265	4.19569	1.21874	0.285387			3.44265	3.78637	1.09984	0.137294
Ifitm5	M300004659	ENSMUSG00000025489		73835	Ifitm5	interferon induced transmembrane protein 5 [Source:MarkerSymbol;Acc:MGI:1934923]	GO:0007275(multicellular organismal development);GO:0009607(response to biotic stimulus)	GO:0003674(molecular_function)	GO:0016021(integral to membrane)	19.7675	16.1364	0.816309	-0.292813			19.7675	7.41346	0.375032	-1.41491		*
-	M300004420									11.2004	12.4329	1.11005	0.150619			11.2004	13.6392	1.21774	0.284211
-	M400001079									6.24819	5.82275	0.931909	-0.101739			6.24819	11.9419	1.91126	0.934523
Cabyr	M300004124	ENSMUSG00000024430	NM_027687	0	Cabyr	calcium-binding tyrosine-(Y)-phosphorylation regulated (fibrousheathin 2) [Source:MarkerSymbol;Acc:MGI:1918382]	GO:0007165(signal transduction)	GO:0005198(structural molecule activity);GO:0005509(calcium ion binding);GO:0008603(cAMP-dependent protein kinase regulator activity);GO:0046872(metal ion binding)	GO:0005634(nucleus);GO:0005856(cytoskeleton);GO:0009434(microtubule-based flagellum)	7.52219	6.82748	0.907646	-0.139799			7.52219	9.397	1.24924	0.321048
Stard4	M300004096	ENSMUSG00000024378	NM_133774	0	Stard4	StAR-related lipid transfer (START) domain containing 4 [Source:MarkerSymbol;Acc:MGI:2156764]	GO:0006694(steroid biosynthetic process);GO:0006810(transport);GO:0006869(lipid transport)	GO:0008289(lipid binding);GO:0015485(cholesterol binding);GO:0017127(cholesterol transporter activity)	GO:0005739(mitochondrion)	173.159	88.7794	0.512704	-0.963801			173.159	107.712	0.622038	-0.684925
Akap8	M300003877	ENSMUSG00000024045	NM_019774	56399	Akap8	A kinase (PRKA) anchor protein 8 [Source:MarkerSymbol;Acc:MGI:1928488]				208.778	138.578	0.663759	-0.591268			208.778	180.383	0.863994	-0.210907
Foxp4	M300003849	ENSMUSG00000023991	NM_028767	74123	Foxp4	forkhead box P4 [Source:MarkerSymbol;Acc:MGI:1921373]	GO:0000122(negative regulation of transcription from RNA polymerase II promoter);GO:0006350(transcription);GO:0006355(regulation of transcription, DNA-dependent);GO:0007507(heart development);GO:0048617(embryonic foregut morphogenesis)	GO:0003676(nucleic acid binding);GO:0003677(DNA binding);GO:0003700(transcription factor activity);GO:0008270(zinc ion binding);GO:0016564(transcriptional repressor activity);GO:0042803(protein homodimerization activity);GO:0043565(sequence-specific DNA binding);GO:0046872(metal ion binding);GO:0046982(protein heterodimerization activity)	GO:0005622(intracellular);GO:0005634(nucleus)	15.083	7.34126	0.486725	-1.03882		*	15.083	6.85153	0.454256	-1.13842		*
Cbr3	M300003595	ENSMUSG00000022947	NM_173047	109857	Cbr3	carbonyl reductase 3 [Source:MarkerSymbol;Acc:MGI:1309992]	GO:0008152(metabolic process)	GO:0004090(carbonyl reductase (NADPH) activity);GO:0016491(oxidoreductase activity)	GO:0005829(cytosol)	96.5856	73.6473	0.762508	-0.391175			96.5856	84.803	0.878009	-0.187692
Kng1	M300003565	ENSMUSG00000022875		0	Kng1	kininogen 1 [Source:MarkerSymbol;Acc:MGI:1097705]				3.79556	2.06781	0.544798	-0.876205			3.79556	0.495284	0.13049	-2.93799		**
Zfp251	M300003334	ENSMUSG00000022526	XM_147946	71591	Zfp251	zinc finger protein 251 [Source:MarkerSymbol;Acc:MGI:1918841]	GO:0006355(regulation of transcription, DNA-dependent)	GO:0003676(nucleic acid binding);GO:0008270(zinc ion binding);GO:0046872(metal ion binding)	GO:0005622(intracellular);GO:0005634(nucleus)	16.2896	12.5565	0.770831	-0.375513			16.2896	13.3109	0.817142	-0.291342
XP_355309.4	M400000953									56.7519	57.9038	1.0203	0.0289878			56.7519	49.226	0.867389	-0.205249
Itm2b	M300003096	ENSMUSG00000022108		16432	Itm2b	integral membrane protein 2B [Source:MarkerSymbol;Acc:MGI:1309517]	GO:0006915(apoptosis);GO:0006917(induction of apoptosis)	GO:0005515(protein binding);GO:0005524(ATP binding)	GO:0005624(membrane fraction);GO:0016020(membrane);GO:0016021(integral to membrane)	551.147	1601.36	2.9055	1.53879	*		551.147	613.425	1.113	0.15445
Ccdc25	M300003074	ENSMUSG00000022035	NM_145944	67179	Ccdc25	coiled-coil domain containing 25 [Source:MarkerSymbol;Acc:MGI:1914429]				54.885	54.8144	0.998712	-0.00185944			54.885	83.5702	1.52264	0.606575
Magi1	M300008977	ENSMUSG00000045095	NM_010367	14924	Magi1	membrane associated guanylate kinase, WW and PDZ domain containing 1 [Source:MarkerSymbol;Acc:MGI:1203522]	GO:0007242(intracellular signaling cascade)	GO:0000166(nucleotide binding);GO:0005515(protein binding);GO:0005524(ATP binding);GO:0016301(kinase activity);GO:0016740(transferase activity)	GO:0005634(nucleus);GO:0005923(tight junction);GO:0016020(membrane)	18.9223	15.5226	0.820335	-0.285716			18.9223	18.5312	0.979332	-0.0301306
AW060207	M300008933	ENSMUSG00000033773	NM_144911	231571	AW060207	expressed sequence AW060207 [Source:MarkerSymbol;Acc:MGI:2141142]			GO:0016020(membrane);GO:0016021(integral to membrane)	93.3019	100.34	1.07543	0.104915			93.3019	76.013	0.814699	-0.29566
Ttll4	M300008666	ENSMUSG00000033257	XM_129771	67534	Ttll4	tubulin tyrosine ligase-like family, member 4 [Source:MarkerSymbol;Acc:MGI:1914784]	GO:0006464(protein modification)	GO:0003824(catalytic activity);GO:0004835(tubulin-tyrosine ligase activity);GO:0005524(ATP binding);GO:0016874(ligase activity)		13.0038	6.04544	0.464896	-1.10502		*	13.0038	8.60751	0.661921	-0.59527
Parp16	M400001458	ENSMUSG00000032392		0	Parp16	poly (ADP-ribose) polymerase family, member 16 [Source:MarkerSymbol;Acc:MGI:2446133]				3.88262	2.68119	0.690561	-0.534159			3.88262	1.35282	0.348429	-1.52106		*
Malt1	M300008387	ENSMUSG00000032688	NM_172833	240354	Malt1	mucosa associated lymphoid tissue lymphoma translocation gene 1 [Source:MarkerSymbol;Acc:MGI:2445027]	GO:0001923(B-1 B cell differentiation);GO:0002237(response to molecule of bacterial origin);GO:0002726(positive regulation of T cell cytokine production);GO:0006508(proteolysis);GO:0006512(ubiquitin cycle);GO:0006915(apoptosis);GO:0007165(signal transduction);GO:0007249(I-kappaB kinase/NF-kappaB cascade);GO:0007250(activation of NF-kappaB-inducing kinase);GO:0009620(response to fungus);GO:0042098…	GO:0004842(ubiquitin-protein ligase activity);GO:0004871(signal transducer activity);GO:0005515(protein binding);GO:0008233(peptidase activity);GO:0016787(hydrolase activity);GO:0019209(kinase activator activity);GO:0030693(caspase activity);GO:0043621(protein self-association)	GO:0005575(cellular_component);GO:0005634(nucleus);GO:0005737(cytoplasm);GO:0005829(cytosol)	17.1174	15.746	0.919884	-0.120476			17.1174	16.4153	0.958985	-0.06042
Flcn	M300008358	ENSMUSG00000032633	NM_146018	0	Flcn	folliculin [Source:MarkerSymbol;Acc:MGI:2442184]	GO:0007049(cell cycle);GO:0008150(biological_process);GO:0045786(negative regulation of progression through cell cycle)	GO:0003674(molecular_function)	GO:0005575(cellular_component)	191.178	428.726	2.24255	1.16514	*		191.178	226.662	1.18561	0.245627
Rnf111	M300008124	ENSMUSG00000032217	NM_033604	93836	Rnf111	ring finger 111 [Source:MarkerSymbol;Acc:MGI:1934919]	GO:0006512(ubiquitin cycle);GO:0007275(multicellular organismal development);GO:0007389(pattern specification process);GO:0016042(lipid catabolic process)	GO:0004623(phospholipase A2 activity);GO:0005509(calcium ion binding);GO:0005515(protein binding);GO:0008270(zinc ion binding);GO:0016874(ligase activity);GO:0046872(metal ion binding)	GO:0005634(nucleus)	118.417	118.775	1.00303	0.00436194			118.417	69.5805	0.58759	-0.767119
Stt3a	M300008081	ENSMUSG00000032116	NM_008408	16430	Stt3a	STT3, subunit of the oligosaccharyltransferase complex, homolog A (S. cerevisiae) [Source:MarkerSymbol;Acc:MGI:105124]	GO:0006486(protein amino acid glycosylation)	GO:0004576(oligosaccharyl transferase activity);GO:0004579(dolichyl-diphosphooligosaccharide-protein glycotransferase activity);GO:0016740(transferase activity)	GO:0005615(extracellular space);GO:0005624(membrane fraction);GO:0005783(endoplasmic reticulum);GO:0016020(membrane);GO:0016021(integral to membrane)	788.977	692.339	0.877515	-0.188504			788.977	523.546	0.663575	-0.591668
Phlppl	M300007869	ENSMUSG00000031732	XM_146511	244650	Phlppl	PH domain and leucine rich repeat protein phosphatase-like [Source:MarkerSymbol;Acc:MGI:2444928]		GO:0003824(catalytic activity);GO:0004721(phosphoprotein phosphatase activity);GO:0005515(protein binding);GO:0016787(hydrolase activity);GO:0030145(manganese ion binding);GO:0046872(metal ion binding)		22.1572	19.0498	0.859756	-0.218002			22.1572	23.8008	1.07418	0.103235
BC050188	M300007840	ENSMUSG00000031651	NM_177742	244448	BC050188	cDNA sequence BC050188 [Source:MarkerSymbol;Acc:MGI:2687279]		GO:0005515(protein binding);GO:0008270(zinc ion binding);GO:0046872(metal ion binding)		2.14908	3.01548	1.40315	0.488667			2.14908
Lmo6	M300007577	ENSMUSG00000031145	NM_175097	0	Lmo6	LIM domain only 6 [Source:MarkerSymbol;Acc:MGI:1859635]		GO:0008270(zinc ion binding);GO:0046872(metal ion binding)		15.0168	16.0818	1.07092	0.0988462			15.0168	13.2654	0.883371	-0.178909
Nox4	M400001293	ENSMUSG00000030562		0	Nox4	NADPH oxidase 4 [Source:MarkerSymbol;Acc:MGI:1354184]					2.17987						0.435483
Vps33b	M300007286	ENSMUSG00000030534	NM_178070	0	Vps33b	vacuolar protein sorting 33B (yeast) [Source:MarkerSymbol;Acc:MGI:2446237]	GO:0006810(transport);GO:0006904(vesicle docking during exocytosis);GO:0015031(protein transport);GO:0016192(vesicle-mediated transport)		GO:0016020(membrane)	83.3886	92.7124	1.11181	0.152913			83.3886	50.0681	0.600419	-0.735958
4933405K07Rik	M300007257									2.88384	3.41313	1.18354	0.243105			2.88384	1.21937	0.422828	-1.24186		*
Kbtbd8	M300006972	ENSMUSG00000030031	XM_144916	243574	Kbtbd8	kelch repeat and BTB (POZ) domain containing 8 [Source:MarkerSymbol;Acc:MGI:2661430]	GO:0008150(biological_process)	GO:0003674(molecular_function);GO:0005515(protein binding)	GO:0005575(cellular_component)	5.22378	2.46467	0.471818	-1.0837		*	5.22378	3.36399	0.643977	-0.63492
Eapa2	M300006912	ENSMUSG00000018656	NM_203396	403088	Eapa2	experimental autoimmune prostatitis antigen 2 [Source:MarkerSymbol;Acc:MGI:3042585]				6.23565	5.04206	0.808586	-0.306528			6.23565	4.70477	0.754495	-0.406416
Anapc5	M300006695	ENSMUSG00000029472	NM_021505	59008	Anapc5	anaphase-promoting complex subunit 5 [Source:MarkerSymbol;Acc:MGI:1929722]	GO:0006512(ubiquitin cycle);GO:0007049(cell cycle);GO:0007067(mitosis);GO:0008150(biological_process);GO:0051301(cell division)	GO:0003674(molecular_function);GO:0005488(binding)	GO:0005575(cellular_component)	1807.29	1300.4	0.719532	-0.47487			1807.29	1141.31	0.631503	-0.663139
Pitpnm2	M300006665	ENSMUSG00000029406	NM_011256	0	Pitpnm2	phosphatidylinositol transfer protein, membrane-associated 2 [Source:MarkerSymbol;Acc:MGI:1336192]	GO:0006118(electron transport);GO:0006810(transport)	GO:0005509(calcium ion binding);GO:0005543(phospholipid binding);GO:0008289(lipid binding);GO:0016491(oxidoreductase activity);GO:0046872(metal ion binding)	GO:0005622(intracellular);GO:0005625(soluble fraction);GO:0016020(membrane)	3.87525	1.90435	0.491413	-1.02499		*	3.87525	2.27229	0.586359	-0.770143
-	M300006435									24.2954	21.3523	0.878863	-0.186289			24.2954	22.052	0.907662	-0.139772
Aebp2	M400001242	ENSMUSG00000030232	NM_009637	0	Aebp2	AE binding protein 2 [Source:MarkerSymbol;Acc:MGI:1338038]				19.1406	17.0909	0.89291	-0.163413			19.1406	19.6876	1.02857	0.0406469
Dmrtb1	M300006191	ENSMUSG00000028610	XM_205469	56296	Dmrtb1	DMRT-like family B with proline-rich C-terminal, 1 [Source:MarkerSymbol;Acc:MGI:1927125]	GO:0006355(regulation of transcription, DNA-dependent);GO:0007548(sex differentiation);GO:0008150(biological_process)	GO:0003700(transcription factor activity);GO:0005515(protein binding)	GO:0005575(cellular_component);GO:0005634(nucleus)	9.84442	8.00916	0.813574	-0.297654			9.84442	11.0743	1.12493	0.169838
-	M300006164									54.168	94.1596	1.73829	0.797669			54.168	40.3714	0.7453	-0.424107
G430022H21Rik	M300005947	ENSMUSG00000028114	NM_201638	210529	G430022H21Rik	RIKEN cDNA G430022H21 gene [Source:MarkerSymbol;Acc:MGI:2442926]	GO:0006139(nucleobase, nucleoside, nucleotide and nucleic acid metabolic process)	GO:0008168(methyltransferase activity)	GO:0005634(nucleus)	69.4116	38.4578	0.554054	-0.851903			69.4116	61.4127	0.884761	-0.17664
Sdk1	M300012297	ENSMUSG00000039683	NM_177879	0	Sdk1	sidekick homolog 1 (chicken) [Source:MarkerSymbol;Acc:MGI:2444413]	GO:0007155(cell adhesion)	GO:0005515(protein binding)	GO:0016020(membrane);GO:0016021(integral to membrane)	3.36295	2.85083	0.847714	-0.23835			3.36295
B3galnt2	M300012056	ENSMUSG00000039242	NM_178640	97884	B3galnt2	UDP-GalNAc:betaGlcNAc beta 1,3-galactosaminyltransferase, polypeptide 2 [Source:MarkerSymbol;Acc:MGI:2145517]	GO:0006486(protein amino acid glycosylation);GO:0019276(UDP-N-acetylgalactosamine metabolic process)	GO:0008376(acetylgalactosaminyltransferase activity);GO:0008378(galactosyltransferase activity);GO:0016740(transferase activity);GO:0016757(transferase activity, transferring glycosyl groups)	GO:0005575(cellular_component);GO:0016020(membrane);GO:0016021(integral to membrane)	36.217	23.7094	0.654648	-0.611208			36.217	34.3594	0.948708	-0.0759641
XP_354643.4	M400001796									3.60517	4.25276	1.17963	0.238333			3.60517	2.11838	0.587596	-0.767102
Ythdf1	M300011809	ENSMUSG00000038848	NM_173761	228994	Ythdf1	YTH domain family 1 [Source:MarkerSymbol;Acc:MGI:1917431]	GO:0008150(biological_process)	GO:0003674(molecular_function)	GO:0005575(cellular_component)	142.415	114.512	0.804068	-0.31461			142.415	109.556	0.769273	-0.378433
-	M300011774									80.8447	76.4582	0.945741	-0.0804824			80.8447	53.9012	0.666725	-0.584836
[truncated: 24,180 more rows]

## Sheet: up-up
Number of genes extracted: 238										C2C12-DF／C2C12-PR						C2C12-W4-08／C2C12-PR
										global normalization				fold_change		global normalization				fold_change
[truncated: 239 more rows]

## Sheet: down-down
Number of genes extracted: 277										C2C12-DF／C2C12-PR						C2C12-W4-08／C2C12-PR
[truncated: 279 more rows]

## Sheet: up-down
Number of genes extracted: 134										C2C12-DF／C2C12-PR						C2C12-W4-08／C2C12-PR
[truncated: 136 more rows]

[truncated: 1 more sheets: down-up]
